# Supplementary material for: Real-Time Chest Compression Quality Measurements by Smartphone Camera
Source: J Healthc Eng. 2018 Oct 28;2018:6241856. doi: 10.1155/2018/6241856 (PMC6277120; doi:10.1155/2018/6241856)
Supplement: Supplementary Materials — The supplementary material consists data files for each of the five presented experiments. For the first four experiments, the data are presented for each test person as Matlab mat-files containing both the compared reference data and the detection data. For the fifth test, CPR summary report test, the data is presented as ssx-files (reference data) and xls-files (detection data). A readme-file explaining the preprocessing performed prior to the comparison between reference data and detection data is here also included. [file 6241856.f1.zip]

Archive with 126 entries (105 files):
- 6241856.f1/Data files/
- 6241856.f1/Data files/Test 1 Main/
- 6241856.f1/Data files/Test 1 Main/readMe.txt
- 6241856.f1/Data files/Test 1 Main/Test person 1/
- 6241856.f1/Data files/Test 1 Main/Test person 1/DetectionSignalsTest1.mat
- 6241856.f1/Data files/Test 1 Main/Test person 1/DetectionSignalsTest10.mat
- 6241856.f1/Data files/Test 1 Main/Test person 1/DetectionSignalsTest11.mat
- 6241856.f1/Data files/Test 1 Main/Test person 1/DetectionSignalsTest2.mat
- 6241856.f1/Data files/Test 1 Main/Test person 1/DetectionSignalsTest3.mat
- 6241856.f1/Data files/Test 1 Main/Test person 1/DetectionSignalsTest4.mat
- 6241856.f1/Data files/Test 1 Main/Test person 1/DetectionSignalsTest5.mat
- 6241856.f1/Data files/Test 1 Main/Test person 1/DetectionSignalsTest6.mat
- 6241856.f1/Data files/Test 1 Main/Test person 1/DetectionSignalsTest7.mat
- 6241856.f1/Data files/Test 1 Main/Test person 1/DetectionSignalsTest8.mat
- 6241856.f1/Data files/Test 1 Main/Test person 1/DetectionSignalsTest9.mat
- 6241856.f1/Data files/Test 1 Main/Test person 2/
- 6241856.f1/Data files/Test 1 Main/Test person 2/DetectionSignalsTest1.mat
- 6241856.f1/Data files/Test 1 Main/Test person 2/DetectionSignalsTest10.mat
- 6241856.f1/Data files/Test 1 Main/Test person 2/DetectionSignalsTest11.mat
- 6241856.f1/Data files/Test 1 Main/Test person 2/DetectionSignalsTest2.mat
- 6241856.f1/Data files/Test 1 Main/Test person 2/DetectionSignalsTest3.mat
- 6241856.f1/Data files/Test 1 Main/Test person 2/DetectionSignalsTest4.mat
- 6241856.f1/Data files/Test 1 Main/Test person 2/DetectionSignalsTest5.mat
- 6241856.f1/Data files/Test 1 Main/Test person 2/DetectionSignalsTest6.mat
- 6241856.f1/Data files/Test 1 Main/Test person 2/DetectionSignalsTest7.mat
- 6241856.f1/Data files/Test 1 Main/Test person 2/DetectionSignalsTest8.mat
- 6241856.f1/Data files/Test 1 Main/Test person 2/DetectionSignalsTest9.mat
- 6241856.f1/Data files/Test 1 Main/Test person 3/
- 6241856.f1/Data files/Test 1 Main/Test person 3/DetectionSignalsTest1.mat
- 6241856.f1/Data files/Test 1 Main/Test person 3/DetectionSignalsTest10.mat
- 6241856.f1/Data files/Test 1 Main/Test person 3/DetectionSignalsTest11.mat
- 6241856.f1/Data files/Test 1 Main/Test person 3/DetectionSignalsTest2.mat
- 6241856.f1/Data files/Test 1 Main/Test person 3/DetectionSignalsTest3.mat
- 6241856.f1/Data files/Test 1 Main/Test person 3/DetectionSignalsTest4.mat
- 6241856.f1/Data files/Test 1 Main/Test person 3/DetectionSignalsTest5.mat
- 6241856.f1/Data files/Test 1 Main/Test person 3/DetectionSignalsTest6.mat
- 6241856.f1/Data files/Test 1 Main/Test person 3/DetectionSignalsTest7.mat
- 6241856.f1/Data files/Test 1 Main/Test person 3/DetectionSignalsTest8.mat
- 6241856.f1/Data files/Test 1 Main/Test person 3/DetectionSignalsTest9.mat
- 6241856.f1/Data files/Test 1 Main/Test person 4/
- 6241856.f1/Data files/Test 1 Main/Test person 4/DetectionSignalsTest1.mat
- 6241856.f1/Data files/Test 1 Main/Test person 4/DetectionSignalsTest10.mat
- 6241856.f1/Data files/Test 1 Main/Test person 4/DetectionSignalsTest11.mat
- 6241856.f1/Data files/Test 1 Main/Test person 4/DetectionSignalsTest2.mat
- 6241856.f1/Data files/Test 1 Main/Test person 4/DetectionSignalsTest3.mat
- 6241856.f1/Data files/Test 1 Main/Test person 4/DetectionSignalsTest4.mat
- 6241856.f1/Data files/Test 1 Main/Test person 4/DetectionSignalsTest5.mat
- 6241856.f1/Data files/Test 1 Main/Test person 4/DetectionSignalsTest6.mat
- 6241856.f1/Data files/Test 1 Main/Test person 4/DetectionSignalsTest7.mat
- 6241856.f1/Data files/Test 1 Main/Test person 4/DetectionSignalsTest8.mat
- 6241856.f1/Data files/Test 1 Main/Test person 4/DetectionSignalsTest9.mat
- 6241856.f1/Data files/Test 1 Main/Test person 5/
- 6241856.f1/Data files/Test 1 Main/Test person 5/DetectionSignalsTest1.mat
- 6241856.f1/Data files/Test 1 Main/Test person 5/DetectionSignalsTest10.mat
- 6241856.f1/Data files/Test 1 Main/Test person 5/DetectionSignalsTest11.mat
- 6241856.f1/Data files/Test 1 Main/Test person 5/DetectionSignalsTest2.mat
- 6241856.f1/Data files/Test 1 Main/Test person 5/DetectionSignalsTest3.mat
- 6241856.f1/Data files/Test 1 Main/Test person 5/DetectionSignalsTest4.mat
- 6241856.f1/Data files/Test 1 Main/Test person 5/DetectionSignalsTest5.mat
- 6241856.f1/Data files/Test 1 Main/Test person 5/DetectionSignalsTest6.mat
- 6241856.f1/Data files/Test 1 Main/Test person 5/DetectionSignalsTest7.mat
- 6241856.f1/Data files/Test 1 Main/Test person 5/DetectionSignalsTest8.mat
- 6241856.f1/Data files/Test 1 Main/Test person 5/DetectionSignalsTest9.mat
- 6241856.f1/Data files/Test 1 Main/Test person 6/
- 6241856.f1/Data files/Test 1 Main/Test person 6/DetectionSignalsTest1.mat
- 6241856.f1/Data files/Test 1 Main/Test person 6/DetectionSignalsTest10.mat
- 6241856.f1/Data files/Test 1 Main/Test person 6/DetectionSignalsTest11.mat
- 6241856.f1/Data files/Test 1 Main/Test person 6/DetectionSignalsTest2.mat
- 6241856.f1/Data files/Test 1 Main/Test person 6/DetectionSignalsTest3.mat
- 6241856.f1/Data files/Test 1 Main/Test person 6/DetectionSignalsTest4.mat
- 6241856.f1/Data files/Test 1 Main/Test person 6/DetectionSignalsTest5.mat
- 6241856.f1/Data files/Test 1 Main/Test person 6/DetectionSignalsTest6.mat
- 6241856.f1/Data files/Test 1 Main/Test person 6/DetectionSignalsTest7.mat
- 6241856.f1/Data files/Test 1 Main/Test person 6/DetectionSignalsTest8.mat
- 6241856.f1/Data files/Test 1 Main/Test person 6/DetectionSignalsTest9.mat
- 6241856.f1/Data files/Test 1 Main/Test person 7/
- 6241856.f1/Data files/Test 1 Main/Test person 7/DetectionSignalsTest1.mat
- 6241856.f1/Data files/Test 1 Main/Test person 7/DetectionSignalsTest10.mat
- 6241856.f1/Data files/Test 1 Main/Test person 7/DetectionSignalsTest11.mat
- 6241856.f1/Data files/Test 1 Main/Test person 7/DetectionSignalsTest2.mat
- 6241856.f1/Data files/Test 1 Main/Test person 7/DetectionSignalsTest3.mat
- 6241856.f1/Data files/Test 1 Main/Test person 7/DetectionSignalsTest4.mat
- 6241856.f1/Data files/Test 1 Main/Test person 7/DetectionSignalsTest5.mat
- 6241856.f1/Data files/Test 1 Main/Test person 7/DetectionSignalsTest6.mat
- 6241856.f1/Data files/Test 1 Main/Test person 7/DetectionSignalsTest7.mat
- 6241856.f1/Data files/Test 1 Main/Test person 7/DetectionSignalsTest8.mat
- 6241856.f1/Data files/Test 1 Main/Test person 7/DetectionSignalsTest9.mat
- 6241856.f1/Data files/Test 2. Outdoor/
- 6241856.f1/Data files/Test 2. Outdoor/Cloudy/
- 6241856.f1/Data files/Test 2. Outdoor/Cloudy/OutdoorCloudyLongNoBackgroundSignals.mat
- 6241856.f1/Data files/Test 2. Outdoor/Cloudy/OutdoorCloudyLongWithBackgroundSignals.mat
- 6241856.f1/Data files/Test 2. Outdoor/Cloudy/OutdoorCloudyMediumNoBackgroundSignals.mat
- 6241856.f1/Data files/Test 2. Outdoor/Cloudy/OutdoorCloudyMediumWithBackgroundSignals.mat
- 6241856.f1/Data files/Test 2. Outdoor/Cloudy/OutdoorCloudyShortNoBackgroundSignals.mat
- 6241856.f1/Data files/Test 2. Outdoor/Cloudy/OutdoorCloudyShortWithBackgroundSignals.mat
- 6241856.f1/Data files/Test 2. Outdoor/Sunshine/
- 6241856.f1/Data files/Test 2. Outdoor/Sunshine/OutdoorSunnyLongNoBackgroundSignals.mat
- 6241856.f1/Data files/Test 2. Outdoor/Sunshine/OutdoorSunnyLongWithBackgroundSignals.mat
- 6241856.f1/Data files/Test 2. Outdoor/Sunshine/OutdoorSunnyMediumNoBackgroundSignals.mat
- 6241856.f1/Data files/Test 2. Outdoor/Sunshine/OutdoorSunnyMediumWithBackgroundSignals.mat
- 6241856.f1/Data files/Test 2. Outdoor/Sunshine/OutdoorSunnyShortNoBackgroundSignals.mat
- 6241856.f1/Data files/Test 2. Outdoor/Sunshine/OutdoorSunnyShortWithBackgroundSignals.mat
- 6241856.f1/Data files/Test 3. Disturbance/
- 6241856.f1/Data files/Test 3. Disturbance/DisturbanceTestSignals.mat
- 6241856.f1/Data files/Test 4. Random movements/
- 6241856.f1/Data files/Test 4. Random movements/RandMovSig-1..mat
- 6241856.f1/Data files/Test 4. Random movements/RandMovSig-2.mat
- 6241856.f1/Data files/Test 4. Random movements/RandMovSig-3.mat
- 6241856.f1/Data files/Test 5. CPR summary report/
- 6241856.f1/Data files/Test 5. CPR summary report/TestData/
- 6241856.f1/Data files/Test 5. CPR summary report/TestData/readMe.txt
- 6241856.f1/Data files/Test 5. CPR summary report/TestData/TP1/
- 6241856.f1/Data files/Test 5. CPR summary report/TestData/TP1/bls_session_CPRMeasuresTest_2017-03-31-13-48-26.ssx
- 6241856.f1/Data files/Test 5. CPR summary report/TestData/TP1/TP1.xls
- 6241856.f1/Data files/Test 5. CPR summary report/TestData/TP2/
- 6241856.f1/Data files/Test 5. CPR summary report/TestData/TP2/bls_session_CPRMeasuresTest_2017-04-04-13-53-23.ssx
- 6241856.f1/Data files/Test 5. CPR summary report/TestData/TP2/TP2.xls
- 6241856.f1/Data files/Test 5. CPR summary report/TestData/TP3/
- 6241856.f1/Data files/Test 5. CPR summary report/TestData/TP3/bls_session_CPRMeasuresTest_2017-04-06-14-40-27.ssx
- 6241856.f1/Data files/Test 5. CPR summary report/TestData/TP3/TP3.xls
- 6241856.f1/Data files/Test 5. CPR summary report/TestData/TP4/
- 6241856.f1/Data files/Test 5. CPR summary report/TestData/TP4/bls_session_CPRMeasuresTest_2017-04-04-15-32-22.ssx
- 6241856.f1/Data files/Test 5. CPR summary report/TestData/TP4/TP4.xls
- 6241856.f1/Data files/Test 5. CPR summary report/TestData/TP5/
- 6241856.f1/Data files/Test 5. CPR summary report/TestData/TP5/bls_session_CPRMeasuresTest_2017-04-07-17-08-28.ssx
- 6241856.f1/Data files/Test 5. CPR summary report/TestData/TP5/TP5.xls
