# Supplementary material for: Real-Time Chest Compression Quality Measurements by Smartphone Camera
Source: J Healthc Eng. 2018 Oct 28;2018:6241856. doi: 10.1155/2018/6241856 (PMC6277120; doi:10.1155/2018/6241856)
Supplement: Supplementary Materials — The supplementary material consists data files for each of the five presented experiments. For the first four experiments, the data are presented for each test person as Matlab mat-files containing both the compared reference data and the detection data. For the fifth test, CPR summary report test, the data is presented as ssx-files (reference data) and xls-files (detection data). A readme-file explaining the preprocessing performed prior to the comparison between reference data and detection data is here also included. [file 6241856.f1.zip › 6241856.f1/Data files/Test 1 Main/readMe.txt]

Test 1 Main:

Test 1 main includes 11 differenct sub-test explained in the article. 
The 7 test persons consists of two test persons with short hair(2,7),  two with medium long hair(3,6) and three with long hair(1,4,5).
