# Supplementary material for: Real-Time Chest Compression Quality Measurements by Smartphone Camera
Source: J Healthc Eng. 2018 Oct 28;2018:6241856. doi: 10.1155/2018/6241856 (PMC6277120; doi:10.1155/2018/6241856)
Supplement: Supplementary Materials — The supplementary material consists data files for each of the five presented experiments. For the first four experiments, the data are presented for each test person as Matlab mat-files containing both the compared reference data and the detection data. For the fifth test, CPR summary report test, the data is presented as ssx-files (reference data) and xls-files (detection data). A readme-file explaining the preprocessing performed prior to the comparison between reference data and detection data is here also included. [file 6241856.f1.zip › 6241856.f1/Data files/Test 5. CPR summary report/TestData/readMe.txt]

In the CPR summary report the reference data for the summary parameters are found from the .ssx-files using Matlab scripts made by Laerdal Medical. 
Unfortunately these scripts can`t be made available due to Laerdal Medical`s policy. The .ssx files generated by the Resusci Anne manikin are though included.


The compression rate signal in the detection data(xls-files) undergoes a preprocessing step before the CPR summary parameters are found and compared with the reference data:


% Filtering short peaks on detection signal. 40 cpm is the lower detection limit and the only value below this threshold is zero(no movement) or -1 (noise)

for o=2 : length(TP1_det_rate)-4
    if TP1_det_rate(o) > 40
        if TP1_det_rate(o-1)<40 
            if TP1_det_rate(o+1)<40 || TP1_det_rate(o+2)<40 || TP1_det_rate(o+3)<40 || TP1_det_rate(o+4)<40 
                filter(o)=TP1_det_rate(o);
                TP1_det_rate(o) = 0;
            end
        end
    end
end

The filter removes possible short false detections caused by random movements prior to CPR start.
