# Supplementary material for: Real-Time Chest Compression Quality Measurements by Smartphone Camera
Source: J Healthc Eng. 2018 Oct 28;2018:6241856. doi: 10.1155/2018/6241856 (PMC6277120; doi:10.1155/2018/6241856)
Supplement: Supplementary Materials — The supplementary material consists data files for each of the five presented experiments. For the first four experiments, the data are presented for each test person as Matlab mat-files containing both the compared reference data and the detection data. For the fifth test, CPR summary report test, the data is presented as ssx-files (reference data) and xls-files (detection data). A readme-file explaining the preprocessing performed prior to the comparison between reference data and detection data is here also included. [file 6241856.f1.zip › 6241856.f1/Data files/Test 5. CPR summary report/TestData/TP1/TP1.xls]

## Sheet: appOyvind
$__	isNew	errors	_maxListeners	_doc	_pres	_posts	save	db	collection	discriminators	__v	id	_id	scepticalToFrequency	mse	sequence	rate	pp2pt	p2et	s2pt	rd	pd	edt	sid	schema	$__delta	$__version	increment	$__where	remove	model	$__buildDoc	init	$__storeShard	hook	pre	post	removePre	_lazySetupHooks	update	set	$__shouldModify	$__set	getValue	setValue	get	$__path	markModified	$__try
	false	undefined	0							undefined	0	58de3af0eb71121000d36d62		true	705	0	0	0	0	0	0	1	undefined	58de3af0eb71121000d36d61
	false	undefined	0							undefined	0	58de3af1eb71121000d36d63		true	1369	1	0	0	0	0	0	1	undefined	58de3af0eb71121000d36d61
	false	undefined	0							undefined	0	58de3af2eb71121000d36d64		true	1905	2	0	0	0	0	0	1	undefined	58de3af0eb71121000d36d61
	false	undefined	0							undefined	0	58de3af2eb71121000d36d65		true	2501	3	0	0	0	0	0	1	undefined	58de3af0eb71121000d36d61
	false	undefined	0							undefined	0	58de3af3eb71121000d36d66		true	2983	4	0	0	0	0	0	1	undefined	58de3af0eb71121000d36d61
	false	undefined	0							undefined	0	58de3af3eb71121000d36d67		true	3514	5	-1	0	0	0	0	1	undefined	58de3af0eb71121000d36d61
	false	undefined	0							undefined	0	58de3af4eb71121000d36d68		true	4050	6	-1	0	0	0	0	1	undefined	58de3af0eb71121000d36d61
	false	undefined	0							undefined	0	58de3af4eb71121000d36d69		true	4577	7	-1	0	0	0	0	1	undefined	58de3af0eb71121000d36d61
	false	undefined	0							undefined	0	58de3af5eb71121000d36d6a		true	5175	8	-1	0	0	0	0	1	undefined	58de3af0eb71121000d36d61
	false	undefined	0							undefined	0	58de3af5eb71121000d36d6b		true	5699	9	-1	0	0	0	0	1	undefined	58de3af0eb71121000d36d61
	false	undefined	0							undefined	0	58de3af6eb71121000d36d6c		true	6257	10	-1	0	0	0	0	1	undefined	58de3af0eb71121000d36d61
	false	undefined	0							undefined	0	58de3af7eb71121000d36d6d		true	6859	11	-1	0	0	0	0	1	undefined	58de3af0eb71121000d36d61
	false	undefined	0							undefined	0	58de3af7eb71121000d36d6e		true	7369	12	-1	0	0	0	0	1	undefined	58de3af0eb71121000d36d61
	false	undefined	0							undefined	0	58de3af8eb71121000d36d6f		true	7907	13	-1	0	0	0	0	1	undefined	58de3af0eb71121000d36d61
	false	undefined	0							undefined	0	58de3af8eb71121000d36d70		true	8538	14	-1	0	0	0	0	1	undefined	58de3af0eb71121000d36d61
	false	undefined	0							undefined	0	58de3af9eb71121000d36d71		true	9043	15	-1	0	0	0	0	1	undefined	58de3af0eb71121000d36d61
	false	undefined	0							undefined	0	58de3af9eb71121000d36d72		true	9606	16	-1	0	0	0	0	1	undefined	58de3af0eb71121000d36d61
	false	undefined	0							undefined	0	58de3afaeb71121000d36d73		true	10126	17	-1	0	0	0	0	1	undefined	58de3af0eb71121000d36d61
	false	undefined	0							undefined	0	58de3afaeb71121000d36d74		true	10647	18	-1	0	0	0	0	1	undefined	58de3af0eb71121000d36d61
	false	undefined	0							undefined	0	58de3afbeb71121000d36d75		false	11191	19	-1	0	0	0	0	1	undefined	58de3af0eb71121000d36d61
	false	undefined	0							undefined	0	58de3afbeb71121000d36d76		false	11726	20	-1	0	0	0	0	1	undefined	58de3af0eb71121000d36d61
	false	undefined	0							undefined	0	58de3afceb71121000d36d77		false	12239	21	-1	0	0	0	0	1	undefined	58de3af0eb71121000d36d61
	false	undefined	0							undefined	0	58de3afceb71121000d36d78		false	12774	22	-1	0	0	0	0	1	undefined	58de3af0eb71121000d36d61
	false	undefined	0							undefined	0	58de3afdeb71121000d36d79		false	13337	23	-1	0	0	0	0	1	undefined	58de3af0eb71121000d36d61
	false	undefined	0							undefined	0	58de3afeeb71121000d36d7a		false	13937	24	-1	0	0	0	0	1	undefined	58de3af0eb71121000d36d61
	false	undefined	0							undefined	0	58de3afeeb71121000d36d7b		false	14381	25	-1	0	0	0	0	1	undefined	58de3af0eb71121000d36d61
	false	undefined	0							undefined	0	58de3affeb71121000d36d7c		false	14935	26	-1	0	0	0	0	1	undefined	58de3af0eb71121000d36d61
	false	undefined	0							undefined	0	58de3affeb71121000d36d7d		false	15451	27	-1	0	0	0	0	1	undefined	58de3af0eb71121000d36d61
	false	undefined	0							undefined	0	58de3b00eb71121000d36d7e		false	15949	28	-1	0	0	0	0	1	undefined	58de3af0eb71121000d36d61
	false	undefined	0							undefined	0	58de3b00eb71121000d36d7f		false	16526	29	-1	0	0	0	0	1	undefined	58de3af0eb71121000d36d61
	false	undefined	0							undefined	0	58de3b01eb71121000d36d80		false	17064	30	-1	0	0	0	0	1	undefined	58de3af0eb71121000d36d61
	false	undefined	0							undefined	0	58de3b01eb71121000d36d81		false	17605	31	-1	0	0	0	0	1	undefined	58de3af0eb71121000d36d61
	false	undefined	0							undefined	0	58de3b02eb71121000d36d82		false	18200	32	-1	0	0	0	0	1	undefined	58de3af0eb71121000d36d61
	false	undefined	0							undefined	0	58de3b02eb71121000d36d83		false	18731	33	-1	0	0	0	0	1	undefined	58de3af0eb71121000d36d61
	false	undefined	0							undefined	0	58de3b03eb71121000d36d84		false	19336	34	-1	0	0	0	0	1	undefined	58de3af0eb71121000d36d61
	false	undefined	0							undefined	0	58de3b04eb71121000d36d85		false	19869	35	-1	0	0	0	0	1	undefined	58de3af0eb71121000d36d61
	false	undefined	0							undefined	0	58de3b04eb71121000d36d86		false	20391	36	-1	0	0	0	0	1	undefined	58de3af0eb71121000d36d61
	false	undefined	0							undefined	0	58de3b05eb71121000d36d87		false	21060	37	-1	0	0	0	0	1	undefined	58de3af0eb71121000d36d61
	false	undefined	0							undefined	0	58de3b05eb71121000d36d88		false	21538	38	-1	0	0	0	0	1	undefined	58de3af0eb71121000d36d61
	false	undefined	0							undefined	0	58de3b06eb71121000d36d89		false	22082	39	-1	0	0	0	0	1	undefined	58de3af0eb71121000d36d61
	false	undefined	0							undefined	0	58de3b06eb71121000d36d8a		false	22624	40	-1	0	0	0	0	1	undefined	58de3af0eb71121000d36d61
	false	undefined	0							undefined	0	58de3b07eb71121000d36d8b		false	23145	41	-1	0	0	0	0	1	undefined	58de3af0eb71121000d36d61
	false	undefined	0							undefined	0	58de3b07eb71121000d36d8c		false	23657	42	-1	0	0	0	0	1	undefined	58de3af0eb71121000d36d61
	false	undefined	0							undefined	0	58de3b08eb71121000d36d8d		false	24206	43	-1	0	0	0	0	1	undefined	58de3af0eb71121000d36d61
	false	undefined	0							undefined	0	58de3b09eb71121000d36d8e		true	24873	44	116	0	0	0	0	1	undefined	58de3af0eb71121000d36d61
	false	undefined	0							undefined	0	58de3b09eb71121000d36d8f		true	25417	45	102	0	0	0	0	1	undefined	58de3af0eb71121000d36d61
	false	undefined	0							undefined	0	58de3b0aeb71121000d36d90		false	25954	46	85	0	0	0	0	1	undefined	58de3af0eb71121000d36d61
	false	undefined	0							undefined	0	58de3b0aeb71121000d36d91		false	26552	50	121	0	0	0	0	1	undefined	58de3af0eb71121000d36d61
	false	undefined	0							undefined	0	58de3b0beb71121000d36d92		false	27000	51	119	0	0	0	0	1	undefined	58de3af0eb71121000d36d61
	false	undefined	0							undefined	0	58de3b0beb71121000d36d93		false	27556	52	121	0	0	0	0	1	undefined	58de3af0eb71121000d36d61
	false	undefined	0							undefined	0	58de3b0ceb71121000d36d94		false	28101	53	122	0	0	0	0	1	undefined	58de3af0eb71121000d36d61
	false	undefined	0							undefined	0	58de3b0ceb71121000d36d95		false	28637	54	120	0	0	0	0	1	undefined	58de3af0eb71121000d36d61
	false	undefined	0							undefined	0	58de3b0deb71121000d36d96		false	29167	55	120	0	0	0	0	1	undefined	58de3af0eb71121000d36d61
	false	undefined	0							undefined	0	58de3b0deb71121000d36d97		false	29769	56	117	0	0	0	0	1	undefined	58de3af0eb71121000d36d61
	false	undefined	0							undefined	0	58de3b0eeb71121000d36d98		false	30356	57	122	0	0	0	0	1	undefined	58de3af0eb71121000d36d61
	false	undefined	0							undefined	0	58de3b0feb71121000d36d99		false	30821	58	121	0	0	0	0	1	undefined	58de3af0eb71121000d36d61
	false	undefined	0							undefined	0	58de3b0feb71121000d36d9a		false	31358	59	122	0	0	0	0	1	undefined	58de3af0eb71121000d36d61
	false	undefined	0							undefined	0	58de3b10eb71121000d36d9b		false	31904	60	123	0	0	0	0	1	undefined	58de3af0eb71121000d36d61
	false	undefined	0							undefined	0	58de3b10eb71121000d36d9c		false	32427	61	122	0	0	0	0	1	undefined	58de3af0eb71121000d36d61
	false	undefined	0							undefined	0	58de3b11eb71121000d36d9d		false	32976	62	119	0	0	0	0	1	undefined	58de3af0eb71121000d36d61
	false	undefined	0							undefined	0	58de3b11eb71121000d36d9e		false	33488	63	117	0	0	0	0	1	undefined	58de3af0eb71121000d36d61
	false	undefined	0							undefined	0	58de3b12eb71121000d36d9f		false	34098	64	121	0	0	0	0	1	undefined	58de3af0eb71121000d36d61
	false	undefined	0							undefined	0	58de3b12eb71121000d36da0		false	34713	65	122	0	0	0	0	1	undefined	58de3af0eb71121000d36d61
	false	undefined	0							undefined	0	58de3b13eb71121000d36da1		false	35238	66	119	0	0	0	0	1	undefined	58de3af0eb71121000d36d61
	false	undefined	0							undefined	0	58de3b14eb71121000d36da2		false	35855	67	118	0	0	0	0	1	undefined	58de3af0eb71121000d36d61
	false	undefined	0							undefined	0	58de3b14eb71121000d36da3		false	36436	68	120	0	0	0	0	1	undefined	58de3af0eb71121000d36d61
	false	undefined	0							undefined	0	58de3b15eb71121000d36da4		false	36958	69	120	0	0	0	0	1	undefined	58de3af0eb71121000d36d61
	false	undefined	0							undefined	0	58de3b15eb71121000d36da5		false	37428	70	120	0	0	0	0	1	undefined	58de3af0eb71121000d36d61
	false	undefined	0							undefined	0	58de3b16eb71121000d36da6		false	37956	71	120	0	0	0	0	1	undefined	58de3af0eb71121000d36d61
	false	undefined	0							undefined	0	58de3b16eb71121000d36da7		false	38506	72	120	0	0	0	0	1	undefined	58de3af0eb71121000d36d61
	false	undefined	0							undefined	0	58de3b17eb71121000d36da8		false	39122	73	121	0	0	0	0	1	undefined	58de3af0eb71121000d36d61
	false	undefined	0							undefined	0	58de3b17eb71121000d36da9		false	39655	74	121	0	0	0	0	1	undefined	58de3af0eb71121000d36d61
	false	undefined	0							undefined	0	58de3b18eb71121000d36daa		false	40174	75	122	0	0	0	0	1	undefined	58de3af0eb71121000d36d61
	false	undefined	0							undefined	0	58de3b18eb71121000d36dab		false	40713	76	124	0	0	0	0	1	undefined	58de3af0eb71121000d36d61
	false	undefined	0							undefined	0	58de3b19eb71121000d36dac		false	41201	77	121	0	0	0	0	1	undefined	58de3af0eb71121000d36d61
	false	undefined	0							undefined	0	58de3b1aeb71121000d36dad		false	41801	78	123	0	0	0	0	1	undefined	58de3af0eb71121000d36d61
	false	undefined	0							undefined	0	58de3b1aeb71121000d36dae		false	42239	79	120	0	0	0	0	1	undefined	58de3af0eb71121000d36d61
	false	undefined	0							undefined	0	58de3b1beb71121000d36daf		false	42912	80	123	0	0	0	0	1	undefined	58de3af0eb71121000d36d61
	false	undefined	0							undefined	0	58de3b1beb71121000d36db0		false	43383	81	122	0	0	0	0	1	undefined	58de3af0eb71121000d36d61
	false	undefined	0							undefined	0	58de3b1ceb71121000d36db1		false	43917	82	121	0	0	0	0	1	undefined	58de3af0eb71121000d36d61
	false	undefined	0							undefined	0	58de3b1ceb71121000d36db2		false	44441	83	125	0	0	0	0	1	undefined	58de3af0eb71121000d36d61
	false	undefined	0							undefined	0	58de3b1deb71121000d36db3		false	44981	84	122	0	0	0	0	1	undefined	58de3af0eb71121000d36d61
	false	undefined	0							undefined	0	58de3b1deb71121000d36db4		false	45594	85	125	0	0	0	0	1	undefined	58de3af0eb71121000d36d61
	false	undefined	0							undefined	0	58de3b1eeb71121000d36db5		false	46112	86	124	0	0	0	0	1	undefined	58de3af0eb71121000d36d61
	false	undefined	0							undefined	0	58de3b1eeb71121000d36db6		false	46667	87	122	0	0	0	0	1	undefined	58de3af0eb71121000d36d61
	false	undefined	0							undefined	0	58de3b1feb71121000d36db7		false	47179	88	121	0	0	0	0	1	undefined	58de3af0eb71121000d36d61
	false	undefined	0							undefined	0	58de3b1feb71121000d36db8		false	47718	89	116	0	0	0	0	1	undefined	58de3af0eb71121000d36d61
	false	undefined	0							undefined	0	58de3b20eb71121000d36db9		false	48264	90	114	0	0	0	0	1	undefined	58de3af0eb71121000d36d61
	false	undefined	0							undefined	0	58de3b20eb71121000d36dba		false	48749	91	112	0	0	0	0	1	undefined	58de3af0eb71121000d36d61
	false	undefined	0							undefined	0	58de3b21eb71121000d36dbb		false	49280	92	113	0	0	0	0	1	undefined	58de3af0eb71121000d36d61
	false	undefined	0							undefined	0	58de3b22eb71121000d36dbc		false	49876	93	118	0	0	0	0	1	undefined	58de3af0eb71121000d36d61
	false	undefined	0							undefined	0	58de3b22eb71121000d36dbd		false	50376	94	117	0	0	0	0	1	undefined	58de3af0eb71121000d36d61
	false	undefined	0							undefined	0	58de3b23eb71121000d36dbe		false	50926	95	117	0	0	0	0	1	undefined	58de3af0eb71121000d36d61
	false	undefined	0							undefined	0	58de3b23eb71121000d36dbf		false	51481	96	115	0	0	0	0	1	undefined	58de3af0eb71121000d36d61
	false	undefined	0							undefined	0	58de3b24eb71121000d36dc0		false	52076	97	116	0	0	0	0	1	undefined	58de3af0eb71121000d36d61
	false	undefined	0							undefined	0	58de3b24eb71121000d36dc1		false	52680	98	117	0	0	0	0	1	undefined	58de3af0eb71121000d36d61
	false	undefined	0							undefined	0	58de3b25eb71121000d36dc2		false	53203	99	115	0	0	0	0	1	undefined	58de3af0eb71121000d36d61
	false	undefined	0							undefined	0	58de3b25eb71121000d36dc3		false	53675	100	115	0	0	0	0	1	undefined	58de3af0eb71121000d36d61
	false	undefined	0							undefined	0	58de3b26eb71121000d36dc4		false	54222	101	118	0	0	0	0	1	undefined	58de3af0eb71121000d36d61
	false	undefined	0							undefined	0	58de3b27eb71121000d36dc5		false	54731	102	119	0	0	0	0	1	undefined	58de3af0eb71121000d36d61
	false	undefined	0							undefined	0	58de3b27eb71121000d36dc6		false	55288	103	116	0	0	0	0	1	undefined	58de3af0eb71121000d36d61
	false	undefined	0							undefined	0	58de3b28eb71121000d36dc7		false	55792	104	117	0	0	0	0	1	undefined	58de3af0eb71121000d36d61
	false	undefined	0							undefined	0	58de3b28eb71121000d36dc8		false	56331	105	117	0	0	0	0	1	undefined	58de3af0eb71121000d36d61
	false	undefined	0							undefined	0	58de3b29eb71121000d36dc9		false	56871	106	118	0	0	0	0	1	undefined	58de3af0eb71121000d36d61
	false	undefined	0							undefined	0	58de3b29eb71121000d36dca		false	57395	107	117	0	0	0	0	1	undefined	58de3af0eb71121000d36d61
	false	undefined	0							undefined	0	58de3b2aeb71121000d36dcb		false	57942	108	117	0	0	0	0	1	undefined	58de3af0eb71121000d36d61
	false	undefined	0							undefined	0	58de3b2aeb71121000d36dcc		false	58492	109	118	0	0	0	0	1	undefined	58de3af0eb71121000d36d61
	false	undefined	0							undefined	0	58de3b2beb71121000d36dcd		false	59019	110	120	0	0	0	0	1	undefined	58de3af0eb71121000d36d61
	false	undefined	0							undefined	0	58de3b2beb71121000d36dce		false	59687	111	120	0	0	0	0	1	undefined	58de3af0eb71121000d36d61
	false	undefined	0							undefined	0	58de3b2ceb71121000d36dcf		false	60216	112	122	0	0	0	0	1	undefined	58de3af0eb71121000d36d61
	false	undefined	0							undefined	0	58de3b2ceb71121000d36dd0		false	60685	113	118	0	0	0	0	1	undefined	58de3af0eb71121000d36d61
	false	undefined	0							undefined	0	58de3b2deb71121000d36dd1		false	61204	114	118	0	0	0	0	1	undefined	58de3af0eb71121000d36d61
	false	undefined	0							undefined	0	58de3b2deb71121000d36dd2		false	61680	115	119	0	0	0	0	1	undefined	58de3af0eb71121000d36d61
	false	undefined	0							undefined	0	58de3b2eeb71121000d36dd3		false	62296	116	120	0	0	0	0	1	undefined	58de3af0eb71121000d36d61
	false	undefined	0							undefined	0	58de3b2eeb71121000d36dd4		false	62759	117	119	0	0	0	0	1	undefined	58de3af0eb71121000d36d61
	false	undefined	0							undefined	0	58de3b2feb71121000d36dd5		false	63377	118	117	0	0	0	0	1	undefined	58de3af0eb71121000d36d61
	false	undefined	0							undefined	0	58de3b30eb71121000d36dd6		false	63888	119	119	0	0	0	0	1	undefined	58de3af0eb71121000d36d61
	false	undefined	0							undefined	0	58de3b30eb71121000d36dd7		false	64337	120	117	0	0	0	0	1	undefined	58de3af0eb71121000d36d61
	false	undefined	0							undefined	0	58de3b31eb71121000d36dd8		false	64907	121	119	0	0	0	0	1	undefined	58de3af0eb71121000d36d61
	false	undefined	0							undefined	0	58de3b31eb71121000d36dd9		false	65422	122	118	0	0	0	0	1	undefined	58de3af0eb71121000d36d61
	false	undefined	0							undefined	0	58de3b32eb71121000d36dda		false	65967	123	118	0	0	0	0	1	undefined	58de3af0eb71121000d36d61
	false	undefined	0							undefined	0	58de3b32eb71121000d36ddb		false	66490	124	117	0	0	0	0	1	undefined	58de3af0eb71121000d36d61
	false	undefined	0							undefined	0	58de3b33eb71121000d36ddc		false	67036	125	117	0	0	0	0	1	undefined	58de3af0eb71121000d36d61
	false	undefined	0							undefined	0	58de3b33eb71121000d36ddd		false	67561	126	121	0	0	0	0	1	undefined	58de3af0eb71121000d36d61
	false	undefined	0							undefined	0	58de3b34eb71121000d36dde		false	68094	127	122	0	0	0	0	1	undefined	58de3af0eb71121000d36d61
	false	undefined	0							undefined	0	58de3b34eb71121000d36ddf		false	68555	128	121	0	0	0	0	1	undefined	58de3af0eb71121000d36d61
	false	undefined	0							undefined	0	58de3b35eb71121000d36de0		false	69172	129	122	0	0	0	0	1	undefined	58de3af0eb71121000d36d61
	false	undefined	0							undefined	0	58de3b35eb71121000d36de1		false	69711	130	120	0	0	0	0	1	undefined	58de3af0eb71121000d36d61
	false	undefined	0							undefined	0	58de3b36eb71121000d36de2		false	70240	131	119	0	0	0	0	1	undefined	58de3af0eb71121000d36d61
	false	undefined	0							undefined	0	58de3b36eb71121000d36de3		false	70762	132	119	0	0	0	0	1	undefined	58de3af0eb71121000d36d61
	false	undefined	0							undefined	0	58de3b37eb71121000d36de4		false	71312	133	117	0	0	0	0	1	undefined	58de3af0eb71121000d36d61
	false	undefined	0							undefined	0	58de3b38eb71121000d36de5		false	71911	134	120	0	0	0	0	1	undefined	58de3af0eb71121000d36d61
	false	undefined	0							undefined	0	58de3b38eb71121000d36de6		false	72378	135	117	0	0	0	0	1	undefined	58de3af0eb71121000d36d61
	false	undefined	0							undefined	0	58de3b39eb71121000d36de7		false	72912	136	118	0	0	0	0	1	undefined	58de3af0eb71121000d36d61
	false	undefined	0							undefined	0	58de3b39eb71121000d36de8		false	73525	137	117	0	0	0	0	1	undefined	58de3af0eb71121000d36d61
	false	undefined	0							undefined	0	58de3b3aeb71121000d36de9		false	74126	138	116	0	0	0	0	1	undefined	58de3af0eb71121000d36d61
	false	undefined	0							undefined	0	58de3b3aeb71121000d36dea		false	74652	139	118	0	0	0	0	1	undefined	58de3af0eb71121000d36d61
	false	undefined	0							undefined	0	58de3b3beb71121000d36deb		false	75177	140	117	0	0	0	0	1	undefined	58de3af0eb71121000d36d61
	false	undefined	0							undefined	0	58de3b3beb71121000d36dec		false	75715	141	120	0	0	0	0	1	undefined	58de3af0eb71121000d36d61
	false	undefined	0							undefined	0	58de3b3ceb71121000d36ded		false	76311	142	118	0	0	0	0	1	undefined	58de3af0eb71121000d36d61
	false	undefined	0							undefined	0	58de3b3deb71121000d36dee		false	76854	143	119	0	0	0	0	1	undefined	58de3af0eb71121000d36d61
	false	undefined	0							undefined	0	58de3b3deb71121000d36def		false	77397	144	118	0	0	0	0	1	undefined	58de3af0eb71121000d36d61
	false	undefined	0							undefined	0	58de3b3eeb71121000d36df0		false	77932	145	118	0	0	0	0	1	undefined	58de3af0eb71121000d36d61
	false	undefined	0							undefined	0	58de3b3eeb71121000d36df1		false	78458	146	120	0	0	0	0	1	undefined	58de3af0eb71121000d36d61
	false	undefined	0							undefined	0	58de3b3feb71121000d36df2		false	78997	147	120	0	0	0	0	1	undefined	58de3af0eb71121000d36d61
	false	undefined	0							undefined	0	58de3b3feb71121000d36df3		false	79530	148	122	0	0	0	0	1	undefined	58de3af0eb71121000d36d61
	false	undefined	0							undefined	0	58de3b40eb71121000d36df4		false	80042	149	120	0	0	0	0	1	undefined	58de3af0eb71121000d36d61
	false	undefined	0							undefined	0	58de3b40eb71121000d36df5		false	80607	150	115	0	0	0	0	1	undefined	58de3af0eb71121000d36d61
	false	undefined	0							undefined	0	58de3b41eb71121000d36df6		false	81113	151	116	0	0	0	0	1	undefined	58de3af0eb71121000d36d61
	false	undefined	0							undefined	0	58de3b41eb71121000d36df7		false	81637	152	120	0	0	0	0	1	undefined	58de3af0eb71121000d36d61
	false	undefined	0							undefined	0	58de3b42eb71121000d36df8		false	82195	153	120	0	0	0	0	1	undefined	58de3af0eb71121000d36d61
	false	undefined	0							undefined	0	58de3b42eb71121000d36df9		false	82727	154	120	0	0	0	0	1	undefined	58de3af0eb71121000d36d61
	false	undefined	0							undefined	0	58de3b43eb71121000d36dfa		false	83249	155	120	0	0	0	0	1	undefined	58de3af0eb71121000d36d61
	false	undefined	0							undefined	0	58de3b43eb71121000d36dfb		false	83762	156	123	0	0	0	0	1	undefined	58de3af0eb71121000d36d61
	false	undefined	0							undefined	0	58de3b44eb71121000d36dfc		false	84328	157	123	0	0	0	0	1	undefined	58de3af0eb71121000d36d61
	false	undefined	0							undefined	0	58de3b44eb71121000d36dfd		false	84795	158	119	0	0	0	0	1	undefined	58de3af0eb71121000d36d61
	false	undefined	0							undefined	0	58de3b45eb71121000d36dfe		false	85335	159	118	0	0	0	0	1	undefined	58de3af0eb71121000d36d61
	false	undefined	0							undefined	0	58de3b46eb71121000d36dff		false	85851	160	119	0	0	0	0	1	undefined	58de3af0eb71121000d36d61
	false	undefined	0							undefined	0	58de3b46eb71121000d36e00		false	86360	161	120	0	0	0	0	1	undefined	58de3af0eb71121000d36d61
	false	undefined	0							undefined	0	58de3b47eb71121000d36e01		false	86952	162	119	0	0	0	0	1	undefined	58de3af0eb71121000d36d61
	false	undefined	0							undefined	0	58de3b47eb71121000d36e02		false	87373	163	116	0	0	0	0	1	undefined	58de3af0eb71121000d36d61
	false	undefined	0							undefined	0	58de3b48eb71121000d36e03		false	87931	164	117	0	0	0	0	1	undefined	58de3af0eb71121000d36d61
	false	undefined	0							undefined	0	58de3b48eb71121000d36e04		false	88459	165	118	0	0	0	0	1	undefined	58de3af0eb71121000d36d61
	false	undefined	0							undefined	0	58de3b49eb71121000d36e05		false	89016	166	118	0	0	0	0	1	undefined	58de3af0eb71121000d36d61
	false	undefined	0							undefined	0	58de3b49eb71121000d36e06		false	89545	167	117	0	0	0	0	1	undefined	58de3af0eb71121000d36d61
	false	undefined	0							undefined	0	58de3b4aeb71121000d36e07		false	90081	168	116	0	0	0	0	1	undefined	58de3af0eb71121000d36d61
	false	undefined	0							undefined	0	58de3b4aeb71121000d36e08		false	90624	169	118	0	0	0	0	1	undefined	58de3af0eb71121000d36d61
	false	undefined	0							undefined	0	58de3b4beb71121000d36e09		false	91150	170	118	0	0	0	0	1	undefined	58de3af0eb71121000d36d61
	false	undefined	0							undefined	0	58de3b4beb71121000d36e0a		false	91665	171	118	0	0	0	0	1	undefined	58de3af0eb71121000d36d61
	false	undefined	0							undefined	0	58de3b4ceb71121000d36e0b		false	92291	172	118	0	0	0	0	1	undefined	58de3af0eb71121000d36d61
	false	undefined	0							undefined	0	58de3b4deb71121000d36e0c		false	92816	173	117	0	0	0	0	1	undefined	58de3af0eb71121000d36d61
	false	undefined	0							undefined	0	58de3b4deb71121000d36e0d		false	93346	174	119	0	0	0	0	1	undefined	58de3af0eb71121000d36d61
	false	undefined	0							undefined	0	58de3b4eeb71121000d36e0e		false	93880	175	120	0	0	0	0	1	undefined	58de3af0eb71121000d36d61
	false	undefined	0							undefined	0	58de3b4eeb71121000d36e0f		false	94348	176	119	0	0	0	0	1	undefined	58de3af0eb71121000d36d61
	false	undefined	0							undefined	0	58de3b4feb71121000d36e10		false	94974	177	117	0	0	0	0	1	undefined	58de3af0eb71121000d36d61
	false	undefined	0							undefined	0	58de3b4feb71121000d36e11		false	95580	178	117	0	0	0	0	1	undefined	58de3af0eb71121000d36d61
	false	undefined	0							undefined	0	58de3b50eb71121000d36e12		false	96082	179	119	0	0	0	0	1	undefined	58de3af0eb71121000d36d61
	false	undefined	0							undefined	0	58de3b50eb71121000d36e13		false	96634	180	117	0	0	0	0	1	undefined	58de3af0eb71121000d36d61
	false	undefined	0							undefined	0	58de3b51eb71121000d36e14		false	97154	181	114	0	0	0	0	1	undefined	58de3af0eb71121000d36d61
	false	undefined	0							undefined	0	58de3b51eb71121000d36e15		false	97698	182	117	0	0	0	0	1	undefined	58de3af0eb71121000d36d61
	false	undefined	0							undefined	0	58de3b52eb71121000d36e16		false	98210	183	118	0	0	0	0	1	undefined	58de3af0eb71121000d36d61
	false	undefined	0							undefined	0	58de3b52eb71121000d36e17		false	98699	184	117	0	0	0	0	1	undefined	58de3af0eb71121000d36d61
	false	undefined	0							undefined	0	58de3b53eb71121000d36e18		false	99237	185	118	0	0	0	0	1	undefined	58de3af0eb71121000d36d61
	false	undefined	0							undefined	0	58de3b54eb71121000d36e19		false	99780	186	120	0	0	0	0	1	undefined	58de3af0eb71121000d36d61
	false	undefined	0							undefined	0	58de3b54eb71121000d36e1a		false	100303	187	121	0	0	0	0	1	undefined	58de3af0eb71121000d36d61
	false	undefined	0							undefined	0	58de3b55eb71121000d36e1b		false	100772	188	120	0	0	0	0	1	undefined	58de3af0eb71121000d36d61
	false	undefined	0							undefined	0	58de3b55eb71121000d36e1c		false	101282	189	120	0	0	0	0	1	undefined	58de3af0eb71121000d36d61
	false	undefined	0							undefined	0	58de3b56eb71121000d36e1d		false	101841	190	120	0	0	0	0	1	undefined	58de3af0eb71121000d36d61
	false	undefined	0							undefined	0	58de3b56eb71121000d36e1e		false	102449	191	118	0	0	0	0	1	undefined	58de3af0eb71121000d36d61
	false	undefined	0							undefined	0	58de3b57eb71121000d36e1f		false	102967	192	116	0	0	0	0	1	undefined	58de3af0eb71121000d36d61
	false	undefined	0							undefined	0	58de3b57eb71121000d36e20		false	103571	193	118	0	0	0	0	1	undefined	58de3af0eb71121000d36d61
	false	undefined	0							undefined	0	58de3b58eb71121000d36e21		false	104035	194	120	0	0	0	0	1	undefined	58de3af0eb71121000d36d61
	false	undefined	0							undefined	0	58de3b58eb71121000d36e22		false	104579	195	120	0	0	0	0	1	undefined	58de3af0eb71121000d36d61
	false	undefined	0							undefined	0	58de3b59eb71121000d36e23		false	105097	196	118	0	0	0	0	1	undefined	58de3af0eb71121000d36d61
	false	undefined	0							undefined	0	58de3b59eb71121000d36e24		false	105636	197	115	0	0	0	0	1	undefined	58de3af0eb71121000d36d61
	false	undefined	0							undefined	0	58de3b5aeb71121000d36e25		false	106136	198	116	0	0	0	0	1	undefined	58de3af0eb71121000d36d61
	false	undefined	0							undefined	0	58de3b5aeb71121000d36e26		false	106728	199	110	0	0	0	0	1	undefined	58de3af0eb71121000d36d61
	false	undefined	0							undefined	0	58de3b5beb71121000d36e27		false	107239	200	111	0	0	0	0	1	undefined	58de3af0eb71121000d36d61
	false	undefined	0							undefined	0	58de3b5ceb71121000d36e28		false	107756	201	116	0	0	0	0	1	undefined	58de3af0eb71121000d36d61
	false	undefined	0							undefined	0	58de3b5ceb71121000d36e29		false	108250	202	117	0	0	0	0	1	undefined	58de3af0eb71121000d36d61
	false	undefined	0							undefined	0	58de3b5deb71121000d36e2a		false	108861	203	121	0	0	0	0	1	undefined	58de3af0eb71121000d36d61
	false	undefined	0							undefined	0	58de3b5deb71121000d36e2b		false	109316	204	118	0	0	0	0	1	undefined	58de3af0eb71121000d36d61
	false	undefined	0							undefined	0	58de3b5eeb71121000d36e2c		false	109855	205	121	0	0	0	0	1	undefined	58de3af0eb71121000d36d61
	false	undefined	0							undefined	0	58de3b5eeb71121000d36e2d		false	110323	206	121	0	0	0	0	1	undefined	58de3af0eb71121000d36d61
	false	undefined	0							undefined	0	58de3b5feb71121000d36e2e		false	110857	207	120	0	0	0	0	1	undefined	58de3af0eb71121000d36d61
	false	undefined	0							undefined	0	58de3b5feb71121000d36e2f		false	111363	208	121	0	0	0	0	1	undefined	58de3af0eb71121000d36d61
	false	undefined	0							undefined	0	58de3b60eb71121000d36e30		false	111910	209	116	0	0	0	0	1	undefined	58de3af0eb71121000d36d61
	false	undefined	0							undefined	0	58de3b60eb71121000d36e31		false	112445	210	117	0	0	0	0	1	undefined	58de3af0eb71121000d36d61
	false	undefined	0							undefined	0	58de3b61eb71121000d36e32		false	112981	211	118	0	0	0	0	1	undefined	58de3af0eb71121000d36d61
	false	undefined	0							undefined	0	58de3b61eb71121000d36e33		false	113514	212	118	0	0	0	0	1	undefined	58de3af0eb71121000d36d61
	false	undefined	0							undefined	0	58de3b62eb71121000d36e34		false	114061	213	117	0	0	0	0	1	undefined	58de3af0eb71121000d36d61
	false	undefined	0							undefined	0	58de3b62eb71121000d36e35		false	114580	214	118	0	0	0	0	1	undefined	58de3af0eb71121000d36d61
	false	undefined	0							undefined	0	58de3b63eb71121000d36e36		false	115275	215	118	0	0	0	0	1	undefined	58de3af0eb71121000d36d61
	false	undefined	0							undefined	0	58de3b63eb71121000d36e37		false	115741	216	120	0	0	0	0	1	undefined	58de3af0eb71121000d36d61
	false	undefined	0							undefined	0	58de3b64eb71121000d36e38		false	116346	217	121	0	0	0	0	1	undefined	58de3af0eb71121000d36d61
	false	undefined	0							undefined	0	58de3b65eb71121000d36e39		false	116850	218	122	0	0	0	0	1	undefined	58de3af0eb71121000d36d61
	false	undefined	0							undefined	0	58de3b65eb71121000d36e3a		false	117408	219	121	0	0	0	0	1	undefined	58de3af0eb71121000d36d61
	false	undefined	0							undefined	0	58de3b66eb71121000d36e3b		false	117857	220	116	0	0	0	0	1	undefined	58de3af0eb71121000d36d61
	false	undefined	0							undefined	0	58de3b66eb71121000d36e3c		false	118389	221	116	0	0	0	0	1	undefined	58de3af0eb71121000d36d61
	false	undefined	0							undefined	0	58de3b67eb71121000d36e3d		false	118931	222	112	0	0	0	0	1	undefined	58de3af0eb71121000d36d61
	false	undefined	0							undefined	0	58de3b67eb71121000d36e3e		false	119546	223	112	0	0	0	0	1	undefined	58de3af0eb71121000d36d61
	false	undefined	0							undefined	0	58de3b68eb71121000d36e3f		false	120083	224	111	0	0	0	0	1	undefined	58de3af0eb71121000d36d61
	false	undefined	0							undefined	0	58de3b68eb71121000d36e40		false	120607	225	110	0	0	0	0	1	undefined	58de3af0eb71121000d36d61
	false	undefined	0							undefined	0	58de3b69eb71121000d36e41		false	121092	226	113	0	0	0	0	1	undefined	58de3af0eb71121000d36d61
	false	undefined	0							undefined	0	58de3b69eb71121000d36e42		false	121615	227	110	0	0	0	0	1	undefined	58de3af0eb71121000d36d61
	false	undefined	0							undefined	0	58de3b6aeb71121000d36e43		false	122144	228	110	0	0	0	0	1	undefined	58de3af0eb71121000d36d61
	false	undefined	0							undefined	0	58de3b6aeb71121000d36e44		false	122729	229	112	0	0	0	0	1	undefined	58de3af0eb71121000d36d61
	false	undefined	0							undefined	0	58de3b6beb71121000d36e45		false	123259	230	112	0	0	0	0	1	undefined	58de3af0eb71121000d36d61
	false	undefined	0							undefined	0	58de3b6ceb71121000d36e46		false	123803	231	112	0	0	0	0	1	undefined	58de3af0eb71121000d36d61
	false	undefined	0							undefined	0	58de3b6ceb71121000d36e47		false	124357	232	111	0	0	0	0	1	undefined	58de3af0eb71121000d36d61
	false	undefined	0							undefined	0	58de3b6deb71121000d36e48		false	124949	233	113	0	0	0	0	1	undefined	58de3af0eb71121000d36d61
	false	undefined	0							undefined	0	58de3b6deb71121000d36e49		false	125551	234	113	0	0	0	0	1	undefined	58de3af0eb71121000d36d61
	false	undefined	0							undefined	0	58de3b6eeb71121000d36e4a		false	126084	235	114	0	0	0	0	1	undefined	58de3af0eb71121000d36d61
	false	undefined	0							undefined	0	58de3b6eeb71121000d36e4b		false	126541	236	114	0	0	0	0	1	undefined	58de3af0eb71121000d36d61
	false	undefined	0							undefined	0	58de3b6feb71121000d36e4c		false	127208	237	114	0	0	0	0	1	undefined	58de3af0eb71121000d36d61
	false	undefined	0							undefined	0	58de3b70eb71121000d36e4d		false	127822	238	114	0	0	0	0	1	undefined	58de3af0eb71121000d36d61
	false	undefined	0							undefined	0	58de3b70eb71121000d36e4e		false	128381	239	113	0	0	0	0	1	undefined	58de3af0eb71121000d36d61
	false	undefined	0							undefined	0	58de3b71eb71121000d36e4f		false	128897	240	112	0	0	0	0	1	undefined	58de3af0eb71121000d36d61
	false	undefined	0							undefined	0	58de3b71eb71121000d36e50		false	129428	241	112	0	0	0	0	1	undefined	58de3af0eb71121000d36d61
	false	undefined	0							undefined	0	58de3b72eb71121000d36e51		false	130030	242	115	0	0	0	0	1	undefined	58de3af0eb71121000d36d61
	false	undefined	0							undefined	0	58de3b72eb71121000d36e52		false	130564	243	118	0	0	0	0	1	undefined	58de3af0eb71121000d36d61
	false	undefined	0							undefined	0	58de3b73eb71121000d36e53		false	131014	244	117	0	0	0	0	1	undefined	58de3af0eb71121000d36d61
	false	undefined	0							undefined	0	58de3b73eb71121000d36e54		false	131636	245	117	0	0	0	0	1	undefined	58de3af0eb71121000d36d61
	false	undefined	0							undefined	0	58de3b74eb71121000d36e55		false	132153	246	113	0	0	0	0	1	undefined	58de3af0eb71121000d36d61
	false	undefined	0							undefined	0	58de3b74eb71121000d36e56		false	132694	247	114	0	0	0	0	1	undefined	58de3af0eb71121000d36d61
	false	undefined	0							undefined	0	58de3b75eb71121000d36e57		false	133241	248	117	0	0	0	0	1	undefined	58de3af0eb71121000d36d61
	false	undefined	0							undefined	0	58de3b76eb71121000d36e58		false	133823	249	119	0	0	0	0	1	undefined	58de3af0eb71121000d36d61
	false	undefined	0							undefined	0	58de3b76eb71121000d36e59		false	134349	250	119	0	0	0	0	1	undefined	58de3af0eb71121000d36d61
	false	undefined	0							undefined	0	58de3b77eb71121000d36e5a		false	134920	251	114	0	0	0	0	1	undefined	58de3af0eb71121000d36d61
	false	undefined	0							undefined	0	58de3b77eb71121000d36e5b		false	135420	252	114	0	0	0	0	1	undefined	58de3af0eb71121000d36d61
	false	undefined	0							undefined	0	58de3b78eb71121000d36e5c		false	135959	253	116	0	0	0	0	1	undefined	58de3af0eb71121000d36d61
	false	undefined	0							undefined	0	58de3b78eb71121000d36e5d		false	136516	254	117	0	0	0	0	1	undefined	58de3af0eb71121000d36d61
	false	undefined	0							undefined	0	58de3b79eb71121000d36e5e		false	137049	255	112	0	0	0	0	1	undefined	58de3af0eb71121000d36d61
	false	undefined	0							undefined	0	58de3b79eb71121000d36e5f		false	137574	256	112	0	0	0	0	1	undefined	58de3af0eb71121000d36d61
	false	undefined	0							undefined	0	58de3b7aeb71121000d36e60		false	138120	257	112	0	0	0	0	1	undefined	58de3af0eb71121000d36d61
	false	undefined	0							undefined	0	58de3b7aeb71121000d36e61		false	138725	258	112	0	0	0	0	1	undefined	58de3af0eb71121000d36d61
	false	undefined	0							undefined	0	58de3b7beb71121000d36e62		false	139311	259	114	0	0	0	0	1	undefined	58de3af0eb71121000d36d61
	false	undefined	0							undefined	0	58de3b7ceb71121000d36e63		true	139914	260	-1	0	0	0	0	1	undefined	58de3af0eb71121000d36d61
	false	undefined	0							undefined	0	58de3b7ceb71121000d36e64		true	140431	261	-1	0	0	0	0	1	undefined	58de3af0eb71121000d36d61
	false	undefined	0							undefined	0	58de3b7deb71121000d36e65		true	140965	262	-1	0	0	0	0	1	undefined	58de3af0eb71121000d36d61
	false	undefined	0							undefined	0	58de3b7deb71121000d36e66		false	141501	266	63	0	0	0	0	1	undefined	58de3af0eb71121000d36d61
	false	undefined	0							undefined	0	58de3b7eeb71121000d36e67		false	142056	267	-1	0	0	0	0	1	undefined	58de3af0eb71121000d36d61
	false	undefined	0							undefined	0	58de3b7eeb71121000d36e68		false	142683	268	-1	0	0	0	0	1	undefined	58de3af0eb71121000d36d61
	false	undefined	0							undefined	0	58de3b7feb71121000d36e69		false	143167	269	-1	0	0	0	0	1	undefined	58de3af0eb71121000d36d61
	false	undefined	0							undefined	0	58de3b7feb71121000d36e6a		false	143723	270	-1	0	0	0	0	1	undefined	58de3af0eb71121000d36d61
	false	undefined	0							undefined	0	58de3b80eb71121000d36e6b		false	144242	271	-1	0	0	0	0	1	undefined	58de3af0eb71121000d36d61
	false	undefined	0							undefined	0	58de3b80eb71121000d36e6c		false	144722	272	-1	0	0	0	0	1	undefined	58de3af0eb71121000d36d61
	false	undefined	0							undefined	0	58de3b81eb71121000d36e6d		false	145322	273	-1	0	0	0	0	1	undefined	58de3af0eb71121000d36d61
	false	undefined	0							undefined	0	58de3b82eb71121000d36e6e		false	145868	274	-1	0	0	0	0	1	undefined	58de3af0eb71121000d36d61
	false	undefined	0							undefined	0	58de3b82eb71121000d36e6f		false	146400	275	-1	0	0	0	0	1	undefined	58de3af0eb71121000d36d61
	false	undefined	0							undefined	0	58de3b83eb71121000d36e70		false	146936	276	-1	0	0	0	0	1	undefined	58de3af0eb71121000d36d61
	false	undefined	0							undefined	0	58de3b83eb71121000d36e71		false	147466	277	-1	0	0	0	0	1	undefined	58de3af0eb71121000d36d61
	false	undefined	0							undefined	0	58de3b84eb71121000d36e72		false	148064	278	-1	0	0	0	0	1	undefined	58de3af0eb71121000d36d61
	false	undefined	0							undefined	0	58de3b84eb71121000d36e73		false	148583	279	-1	0	0	0	0	1	undefined	58de3af0eb71121000d36d61
	false	undefined	0							undefined	0	58de3b85eb71121000d36e74		false	149066	280	-1	0	0	0	0	1	undefined	58de3af0eb71121000d36d61
	false	undefined	0							undefined	0	58de3b85eb71121000d36e75		true	149661	281	-1	0	0	0	0	1	undefined	58de3af0eb71121000d36d61
	false	undefined	0							undefined	0	58de3b86eb71121000d36e76		true	150143	282	-1	0	0	0	0	1	undefined	58de3af0eb71121000d36d61
	false	undefined	0							undefined	0	58de3b86eb71121000d36e77		true	150680	283	-1	0	0	0	0	1	undefined	58de3af0eb71121000d36d61
	false	undefined	0							undefined	0	58de3b87eb71121000d36e78		true	151199	284	-1	0	0	0	0	1	undefined	58de3af0eb71121000d36d61
	false	undefined	0							undefined	0	58de3b87eb71121000d36e79		true	151659	285	-1	0	0	0	0	1	undefined	58de3af0eb71121000d36d61
	false	undefined	0							undefined	0	58de3b88eb71121000d36e7a		false	152280	286	-1	0	0	0	0	1	undefined	58de3af0eb71121000d36d61
	false	undefined	0							undefined	0	58de3b89eb71121000d36e7b		false	152804	287	-1	0	0	0	0	1	undefined	58de3af0eb71121000d36d61
	false	undefined	0							undefined	0	58de3b89eb71121000d36e7c		false	153280	288	-1	0	0	0	0	1	undefined	58de3af0eb71121000d36d61
	false	undefined	0							undefined	0	58de3b8aeb71121000d36e7d		false	153826	289	-1	0	0	0	0	1	undefined	58de3af0eb71121000d36d61
	false	undefined	0							undefined	0	58de3b8aeb71121000d36e7e		false	154347	290	-1	0	0	0	0	1	undefined	58de3af0eb71121000d36d61
	false	undefined	0							undefined	0	58de3b8beb71121000d36e7f		false	154883	291	-1	0	0	0	0	1	undefined	58de3af0eb71121000d36d61
	false	undefined	0							undefined	0	58de3b8beb71121000d36e80		false	155413	292	-1	0	0	0	0	1	undefined	58de3af0eb71121000d36d61
	false	undefined	0							undefined	0	58de3b8ceb71121000d36e81		false	156006	293	-1	0	0	0	0	1	undefined	58de3af0eb71121000d36d61
	false	undefined	0							undefined	0	58de3b8ceb71121000d36e82		false	156539	294	-1	0	0	0	0	1	undefined	58de3af0eb71121000d36d61
	false	undefined	0							undefined	0	58de3b8deb71121000d36e83		false	157141	295	-1	0	0	0	0	1	undefined	58de3af0eb71121000d36d61
	false	undefined	0							undefined	0	58de3b8deb71121000d36e84		false	157664	296	-1	0	0	0	0	1	undefined	58de3af0eb71121000d36d61
	false	undefined	0							undefined	0	58de3b8eeb71121000d36e85		false	158213	297	-1	0	0	0	0	1	undefined	58de3af0eb71121000d36d61
	false	undefined	0							undefined	0	58de3b8eeb71121000d36e86		false	158700	298	-1	0	0	0	0	1	undefined	58de3af0eb71121000d36d61
	false	undefined	0							undefined	0	58de3b8feb71121000d36e87		false	159361	299	-1	0	0	0	0	1	undefined	58de3af0eb71121000d36d61
	false	undefined	0							undefined	0	58de3b90eb71121000d36e88		true	159900	300	-1	0	0	0	0	1	undefined	58de3af0eb71121000d36d61
	false	undefined	0							undefined	0	58de3b90eb71121000d36e89		true	160403	301	-1	0	0	0	0	1	undefined	58de3af0eb71121000d36d61
	false	undefined	0							undefined	0	58de3b91eb71121000d36e8a		true	160904	302	117	0	0	0	0	1	undefined	58de3af0eb71121000d36d61
	false	undefined	0							undefined	0	58de3b91eb71121000d36e8b		false	161495	303	116	0	0	0	0	1	undefined	58de3af0eb71121000d36d61
	false	undefined	0							undefined	0	58de3b92eb71121000d36e8c		false	161946	304	119	0	0	0	0	1	undefined	58de3af0eb71121000d36d61
	false	undefined	0							undefined	0	58de3b92eb71121000d36e8d		false	162487	308	120	0	0	0	0	1	undefined	58de3af0eb71121000d36d61
	false	undefined	0							undefined	0	58de3b93eb71121000d36e8e		false	163010	309	121	0	0	0	0	1	undefined	58de3af0eb71121000d36d61
	false	undefined	0							undefined	0	58de3b93eb71121000d36e8f		false	163489	310	120	0	0	0	0	1	undefined	58de3af0eb71121000d36d61
	false	undefined	0							undefined	0	58de3b94eb71121000d36e90		false	164108	311	120	0	0	0	0	1	undefined	58de3af0eb71121000d36d61
	false	undefined	0							undefined	0	58de3b94eb71121000d36e91		false	164622	312	120	0	0	0	0	1	undefined	58de3af0eb71121000d36d61
	false	undefined	0							undefined	0	58de3b95eb71121000d36e92		false	165157	313	122	0	0	0	0	1	undefined	58de3af0eb71121000d36d61
	false	undefined	0							undefined	0	58de3b95eb71121000d36e93		false	165695	314	120	0	0	0	0	1	undefined	58de3af0eb71121000d36d61
	false	undefined	0							undefined	0	58de3b96eb71121000d36e94		false	166218	315	116	0	0	0	0	1	undefined	58de3af0eb71121000d36d61
	false	undefined	0							undefined	0	58de3b96eb71121000d36e95		false	166756	316	114	0	0	0	0	1	undefined	58de3af0eb71121000d36d61
	false	undefined	0							undefined	0	58de3b97eb71121000d36e96		false	167297	317	116	0	0	0	0	1	undefined	58de3af0eb71121000d36d61
	false	undefined	0							undefined	0	58de3b98eb71121000d36e97		false	167763	318	117	0	0	0	0	1	undefined	58de3af0eb71121000d36d61
	false	undefined	0							undefined	0	58de3b98eb71121000d36e98		false	168294	319	120	0	0	0	0	1	undefined	58de3af0eb71121000d36d61
	false	undefined	0							undefined	0	58de3b99eb71121000d36e99		false	168846	320	120	0	0	0	0	1	undefined	58de3af0eb71121000d36d61
	false	undefined	0							undefined	0	58de3b99eb71121000d36e9a		false	169320	321	122	0	0	0	0	1	undefined	58de3af0eb71121000d36d61
	false	undefined	0							undefined	0	58de3b9aeb71121000d36e9b		false	169844	322	119	0	0	0	0	1	undefined	58de3af0eb71121000d36d61
	false	undefined	0							undefined	0	58de3b9aeb71121000d36e9c		false	170359	323	116	0	0	0	0	1	undefined	58de3af0eb71121000d36d61
	false	undefined	0							undefined	0	58de3b9beb71121000d36e9d		false	170914	324	118	0	0	0	0	1	undefined	58de3af0eb71121000d36d61
	false	undefined	0							undefined	0	58de3b9beb71121000d36e9e		false	171429	325	118	0	0	0	0	1	undefined	58de3af0eb71121000d36d61
	false	undefined	0							undefined	0	58de3b9ceb71121000d36e9f		false	171961	326	119	0	0	0	0	1	undefined	58de3af0eb71121000d36d61
	false	undefined	0							undefined	0	58de3b9ceb71121000d36ea0		false	172523	327	119	0	0	0	0	1	undefined	58de3af0eb71121000d36d61
	false	undefined	0							undefined	0	58de3b9deb71121000d36ea1		false	173013	328	120	0	0	0	0	1	undefined	58de3af0eb71121000d36d61
	false	undefined	0							undefined	0	58de3b9deb71121000d36ea2		false	173575	329	118	0	0	0	0	1	undefined	58de3af0eb71121000d36d61
	false	undefined	0							undefined	0	58de3b9eeb71121000d36ea3		false	174107	330	120	0	0	0	0	1	undefined	58de3af0eb71121000d36d61
	false	undefined	0							undefined	0	58de3b9eeb71121000d36ea4		false	174653	331	118	0	0	0	0	1	undefined	58de3af0eb71121000d36d61
	false	undefined	0							undefined	0	58de3b9feb71121000d36ea5		false	175110	332	112	0	0	0	0	1	undefined	58de3af0eb71121000d36d61
	false	undefined	0							undefined	0	58de3b9feb71121000d36ea6		false	175718	333	110	0	0	0	0	1	undefined	58de3af0eb71121000d36d61
	false	undefined	0							undefined	0	58de3ba0eb71121000d36ea7		false	176233	334	111	0	0	0	0	1	undefined	58de3af0eb71121000d36d61
	false	undefined	0							undefined	0	58de3ba1eb71121000d36ea8		false	176802	335	117	0	0	0	0	1	undefined	58de3af0eb71121000d36d61
	false	undefined	0							undefined	0	58de3ba1eb71121000d36ea9		false	177322	336	118	0	0	0	0	1	undefined	58de3af0eb71121000d36d61
	false	undefined	0							undefined	0	58de3ba2eb71121000d36eaa		false	177933	337	118	0	0	0	0	1	undefined	58de3af0eb71121000d36d61
	false	undefined	0							undefined	0	58de3ba2eb71121000d36eab		false	178390	338	118	0	0	0	0	1	undefined	58de3af0eb71121000d36d61
	false	undefined	0							undefined	0	58de3ba3eb71121000d36eac		false	178930	339	117	0	0	0	0	1	undefined	58de3af0eb71121000d36d61
	false	undefined	0							undefined	0	58de3ba3eb71121000d36ead		false	179587	340	116	0	0	0	0	1	undefined	58de3af0eb71121000d36d61
	false	undefined	0							undefined	0	58de3ba4eb71121000d36eae		false	180068	341	116	0	0	0	0	1	undefined	58de3af0eb71121000d36d61
	false	undefined	0							undefined	0	58de3ba4eb71121000d36eaf		false	180656	342	120	0	0	0	0	1	undefined	58de3af0eb71121000d36d61
	false	undefined	0							undefined	0	58de3ba5eb71121000d36eb0		false	181198	343	117	0	0	0	0	1	undefined	58de3af0eb71121000d36d61
	false	undefined	0							undefined	0	58de3ba5eb71121000d36eb1		false	181766	344	118	0	0	0	0	1	undefined	58de3af0eb71121000d36d61
	false	undefined	0							undefined	0	58de3ba6eb71121000d36eb2		false	182244	345	120	0	0	0	0	1	undefined	58de3af0eb71121000d36d61
	false	undefined	0							undefined	0	58de3ba7eb71121000d36eb3		false	182796	346	121	0	0	0	0	1	undefined	58de3af0eb71121000d36d61
	false	undefined	0							undefined	0	58de3ba7eb71121000d36eb4		false	183321	347	122	0	0	0	0	1	undefined	58de3af0eb71121000d36d61
	false	undefined	0							undefined	0	58de3ba7eb71121000d36eb5		false	183797	348	116	0	0	0	0	1	undefined	58de3af0eb71121000d36d61
	false	undefined	0							undefined	0	58de3ba8eb71121000d36eb6		false	184472	349	114	0	0	0	0	1	undefined	58de3af0eb71121000d36d61
	false	undefined	0							undefined	0	58de3ba9eb71121000d36eb7		false	184943	350	112	0	0	0	0	1	undefined	58de3af0eb71121000d36d61
	false	undefined	0							undefined	0	58de3ba9eb71121000d36eb8		false	185628	351	113	0	0	0	0	1	undefined	58de3af0eb71121000d36d61
	false	undefined	0							undefined	0	58de3baaeb71121000d36eb9		false	186057	352	113	0	0	0	0	1	undefined	58de3af0eb71121000d36d61
	false	undefined	0							undefined	0	58de3baaeb71121000d36eba		false	186627	353	113	0	0	0	0	1	undefined	58de3af0eb71121000d36d61
	false	undefined	0							undefined	0	58de3babeb71121000d36ebb		false	187155	354	121	0	0	0	0	1	undefined	58de3af0eb71121000d36d61
	false	undefined	0							undefined	0	58de3babeb71121000d36ebc		false	187659	355	123	0	0	0	0	1	undefined	58de3af0eb71121000d36d61
	false	undefined	0							undefined	0	58de3baceb71121000d36ebd		false	188213	356	122	0	0	0	0	1	undefined	58de3af0eb71121000d36d61
	false	undefined	0							undefined	0	58de3baceb71121000d36ebe		false	188694	357	118	0	0	0	0	1	undefined	58de3af0eb71121000d36d61
	false	undefined	0							undefined	0	58de3badeb71121000d36ebf		false	189270	358	118	0	0	0	0	1	undefined	58de3af0eb71121000d36d61
	false	undefined	0							undefined	0	58de3baeeb71121000d36ec0		false	189803	359	119	0	0	0	0	1	undefined	58de3af0eb71121000d36d61
	false	undefined	0							undefined	0	58de3baeeb71121000d36ec1		false	190330	360	117	0	0	0	0	1	undefined	58de3af0eb71121000d36d61
	false	undefined	0							undefined	0	58de3bafeb71121000d36ec2		false	190942	361	119	0	0	0	0	1	undefined	58de3af0eb71121000d36d61
	false	undefined	0							undefined	0	58de3bafeb71121000d36ec3		false	191428	362	114	0	0	0	0	1	undefined	58de3af0eb71121000d36d61
	false	undefined	0							undefined	0	58de3bb0eb71121000d36ec4		false	191954	363	112	0	0	0	0	1	undefined	58de3af0eb71121000d36d61
	false	undefined	0							undefined	0	58de3bb0eb71121000d36ec5		false	192470	364	115	0	0	0	0	1	undefined	58de3af0eb71121000d36d61
	false	undefined	0							undefined	0	58de3bb1eb71121000d36ec6		false	193029	365	117	0	0	0	0	1	undefined	58de3af0eb71121000d36d61
	false	undefined	0							undefined	0	58de3bb1eb71121000d36ec7		false	193555	366	117	0	0	0	0	1	undefined	58de3af0eb71121000d36d61
	false	undefined	0							undefined	0	58de3bb2eb71121000d36ec8		false	194092	367	115	0	0	0	0	1	undefined	58de3af0eb71121000d36d61
	false	undefined	0							undefined	0	58de3bb2eb71121000d36ec9		false	194614	368	117	0	0	0	0	1	undefined	58de3af0eb71121000d36d61
	false	undefined	0							undefined	0	58de3bb3eb71121000d36eca		false	195158	369	119	0	0	0	0	1	undefined	58de3af0eb71121000d36d61
	false	undefined	0							undefined	0	58de3bb3eb71121000d36ecb		false	195692	370	119	0	0	0	0	1	undefined	58de3af0eb71121000d36d61
	false	undefined	0							undefined	0	58de3bb4eb71121000d36ecc		false	196224	371	117	0	0	0	0	1	undefined	58de3af0eb71121000d36d61
	false	undefined	0							undefined	0	58de3bb5eb71121000d36ecd		false	196831	372	115	0	0	0	0	1	undefined	58de3af0eb71121000d36d61
	false	undefined	0							undefined	0	58de3bb5eb71121000d36ece		false	197437	373	115	0	0	0	0	1	undefined	58de3af0eb71121000d36d61
	false	undefined	0							undefined	0	58de3bb6eb71121000d36ecf		false	198032	374	115	0	0	0	0	1	undefined	58de3af0eb71121000d36d61
	false	undefined	0							undefined	0	58de3bb6eb71121000d36ed0		false	198635	375	115	0	0	0	0	1	undefined	58de3af0eb71121000d36d61
	false	undefined	0							undefined	0	58de3bb7eb71121000d36ed1		false	199169	376	114	0	0	0	0	1	undefined	58de3af0eb71121000d36d61
	false	undefined	0							undefined	0	58de3bb7eb71121000d36ed2		false	199687	377	112	0	0	0	0	1	undefined	58de3af0eb71121000d36d61
	false	undefined	0							undefined	0	58de3bb8eb71121000d36ed3		false	200297	378	114	0	0	0	0	1	undefined	58de3af0eb71121000d36d61
	false	undefined	0							undefined	0	58de3bb9eb71121000d36ed4		false	200824	379	114	0	0	0	0	1	undefined	58de3af0eb71121000d36d61
	false	undefined	0							undefined	0	58de3bb9eb71121000d36ed5		false	201443	380	114	0	0	0	0	1	undefined	58de3af0eb71121000d36d61
	false	undefined	0							undefined	0	58de3bbaeb71121000d36ed6		false	201958	381	114	0	0	0	0	1	undefined	58de3af0eb71121000d36d61
	false	undefined	0							undefined	0	58de3bbaeb71121000d36ed7		false	202488	382	113	0	0	0	0	1	undefined	58de3af0eb71121000d36d61
	false	undefined	0							undefined	0	58de3bbbeb71121000d36ed8		false	203026	383	114	0	0	0	0	1	undefined	58de3af0eb71121000d36d61
	false	undefined	0							undefined	0	58de3bbbeb71121000d36ed9		false	203634	384	111	0	0	0	0	1	undefined	58de3af0eb71121000d36d61
	false	undefined	0							undefined	0	58de3bbceb71121000d36eda		false	204188	385	114	0	0	0	0	1	undefined	58de3af0eb71121000d36d61
	false	undefined	0							undefined	0	58de3bbceb71121000d36edb		false	204642	386	114	0	0	0	0	1	undefined	58de3af0eb71121000d36d61
	false	undefined	0							undefined	0	58de3bbdeb71121000d36edc		false	205160	387	111	0	0	0	0	1	undefined	58de3af0eb71121000d36d61
	false	undefined	0							undefined	0	58de3bbeeb71121000d36edd		false	205860	388	109	0	0	0	0	1	undefined	58de3af0eb71121000d36d61
	false	undefined	0							undefined	0	58de3bbeeb71121000d36ede		false	206392	389	111	0	0	0	0	1	undefined	58de3af0eb71121000d36d61
	false	undefined	0							undefined	0	58de3bbfeb71121000d36edf		false	206923	390	112	0	0	0	0	1	undefined	58de3af0eb71121000d36d61
	false	undefined	0							undefined	0	58de3bbfeb71121000d36ee0		false	207458	391	111	0	0	0	0	1	undefined	58de3af0eb71121000d36d61
	false	undefined	0							undefined	0	58de3bc0eb71121000d36ee1		false	207986	392	112	0	0	0	0	1	undefined	58de3af0eb71121000d36d61
	false	undefined	0							undefined	0	58de3bc0eb71121000d36ee2		false	208497	393	115	0	0	0	0	1	undefined	58de3af0eb71121000d36d61
	false	undefined	0							undefined	0	58de3bc1eb71121000d36ee3		false	209011	394	115	0	0	0	0	1	undefined	58de3af0eb71121000d36d61
	false	undefined	0							undefined	0	58de3bc1eb71121000d36ee4		false	209565	395	116	0	0	0	0	1	undefined	58de3af0eb71121000d36d61
	false	undefined	0							undefined	0	58de3bc2eb71121000d36ee5		false	210051	396	116	0	0	0	0	1	undefined	58de3af0eb71121000d36d61
	false	undefined	0							undefined	0	58de3bc2eb71121000d36ee6		false	210583	397	117	0	0	0	0	1	undefined	58de3af0eb71121000d36d61
	false	undefined	0							undefined	0	58de3bc3eb71121000d36ee7		false	211034	398	113	0	0	0	0	1	undefined	58de3af0eb71121000d36d61
	false	undefined	0							undefined	0	58de3bc3eb71121000d36ee8		false	211592	399	113	0	0	0	0	1	undefined	58de3af0eb71121000d36d61
	false	undefined	0							undefined	0	58de3bc4eb71121000d36ee9		false	212073	400	114	0	0	0	0	1	undefined	58de3af0eb71121000d36d61
	false	undefined	0							undefined	0	58de3bc4eb71121000d36eea		false	212660	401	112	0	0	0	0	1	undefined	58de3af0eb71121000d36d61
	false	undefined	0							undefined	0	58de3bc5eb71121000d36eeb		false	213318	402	113	0	0	0	0	1	undefined	58de3af0eb71121000d36d61
	false	undefined	0							undefined	0	58de3bc5eb71121000d36eec		false	213794	403	113	0	0	0	0	1	undefined	58de3af0eb71121000d36d61
	false	undefined	0							undefined	0	58de3bc6eb71121000d36eed		false	214278	404	117	0	0	0	0	1	undefined	58de3af0eb71121000d36d61
	false	undefined	0							undefined	0	58de3bc7eb71121000d36eee		false	214811	405	117	0	0	0	0	1	undefined	58de3af0eb71121000d36d61
	false	undefined	0							undefined	0	58de3bc7eb71121000d36eef		false	215390	406	115	0	0	0	0	1	undefined	58de3af0eb71121000d36d61
	false	undefined	0							undefined	0	58de3bc8eb71121000d36ef0		false	215930	407	118	0	0	0	0	1	undefined	58de3af0eb71121000d36d61
	false	undefined	0							undefined	0	58de3bc8eb71121000d36ef1		false	216479	408	118	0	0	0	0	1	undefined	58de3af0eb71121000d36d61
	false	undefined	0							undefined	0	58de3bc9eb71121000d36ef2		false	216991	409	116	0	0	0	0	1	undefined	58de3af0eb71121000d36d61
	false	undefined	0							undefined	0	58de3bc9eb71121000d36ef3		false	217541	410	115	0	0	0	0	1	undefined	58de3af0eb71121000d36d61
	false	undefined	0							undefined	0	58de3bcaeb71121000d36ef4		false	218066	411	112	0	0	0	0	1	undefined	58de3af0eb71121000d36d61
	false	undefined	0							undefined	0	58de3bcaeb71121000d36ef5		false	218682	412	114	0	0	0	0	1	undefined	58de3af0eb71121000d36d61
	false	undefined	0							undefined	0	58de3bcbeb71121000d36ef6		false	219198	413	113	0	0	0	0	1	undefined	58de3af0eb71121000d36d61
	false	undefined	0							undefined	0	58de3bcbeb71121000d36ef7		false	219718	414	106	0	0	0	0	1	undefined	58de3af0eb71121000d36d61
	false	undefined	0							undefined	0	58de3bcceb71121000d36ef8		false	220272	415	100	0	0	0	0	1	undefined	58de3af0eb71121000d36d61
	false	undefined	0							undefined	0	58de3bcdeb71121000d36ef9		false	220789	416	103	0	0	0	0	1	undefined	58de3af0eb71121000d36d61
	false	undefined	0							undefined	0	58de3bcdeb71121000d36efa		false	221254	417	112	0	0	0	0	1	undefined	58de3af0eb71121000d36d61
	false	undefined	0							undefined	0	58de3bceeb71121000d36efb		false	221891	418	118	0	0	0	0	1	undefined	58de3af0eb71121000d36d61
	false	undefined	0							undefined	0	58de3bceeb71121000d36efc		false	222416	419	120	0	0	0	0	1	undefined	58de3af0eb71121000d36d61
	false	undefined	0							undefined	0	58de3bcfeb71121000d36efd		false	222930	420	120	0	0	0	0	1	undefined	58de3af0eb71121000d36d61
	false	undefined	0							undefined	0	58de3bcfeb71121000d36efe		false	223469	421	120	0	0	0	0	1	undefined	58de3af0eb71121000d36d61
	false	undefined	0							undefined	0	58de3bd0eb71121000d36eff		false	224013	422	116	0	0	0	0	1	undefined	58de3af0eb71121000d36d61
	false	undefined	0							undefined	0	58de3bd0eb71121000d36f00		false	224550	423	117	0	0	0	0	1	undefined	58de3af0eb71121000d36d61
	false	undefined	0							undefined	0	58de3bd1eb71121000d36f01		false	225152	424	118	0	0	0	0	1	undefined	58de3af0eb71121000d36d61
	false	undefined	0							undefined	0	58de3bd1eb71121000d36f02		false	225693	425	114	0	0	0	0	1	undefined	58de3af0eb71121000d36d61
	false	undefined	0							undefined	0	58de3bd2eb71121000d36f03		true	226144	426	109	0	0	0	0	1	undefined	58de3af0eb71121000d36d61
	false	undefined	0							undefined	0	58de3bd2eb71121000d36f04		true	226696	427	109	0	0	0	0	1	undefined	58de3af0eb71121000d36d61
	false	undefined	0							undefined	0	58de3bd3eb71121000d36f05		false	227288	428	113	0	0	0	0	1	undefined	58de3af0eb71121000d36d61
	false	undefined	0							undefined	0	58de3bd4eb71121000d36f06		true	227830	429	116	0	0	0	0	1	undefined	58de3af0eb71121000d36d61
	false	undefined	0							undefined	0	58de3bd4eb71121000d36f07		true	228277	430	116	0	0	0	0	1	undefined	58de3af0eb71121000d36d61
	false	undefined	0							undefined	0	58de3bd5eb71121000d36f08		false	228823	431	111	0	0	0	0	1	undefined	58de3af0eb71121000d36d61
	false	undefined	0							undefined	0	58de3bd5eb71121000d36f09		false	229352	432	110	0	0	0	0	1	undefined	58de3af0eb71121000d36d61
	false	undefined	0							undefined	0	58de3bd6eb71121000d36f0a		false	229873	433	115	0	0	0	0	1	undefined	58de3af0eb71121000d36d61
	false	undefined	0							undefined	0	58de3bd6eb71121000d36f0b		false	230379	434	111	0	0	0	0	1	undefined	58de3af0eb71121000d36d61
	false	undefined	0							undefined	0	58de3bd7eb71121000d36f0c		false	230881	435	105	0	0	0	0	1	undefined	58de3af0eb71121000d36d61
	false	undefined	0							undefined	0	58de3bd7eb71121000d36f0d		false	231438	436	109	0	0	0	0	1	undefined	58de3af0eb71121000d36d61
	false	undefined	0							undefined	0	58de3bd8eb71121000d36f0e		false	231971	437	111	0	0	0	0	1	undefined	58de3af0eb71121000d36d61
	false	undefined	0							undefined	0	58de3bd8eb71121000d36f0f		false	232495	438	111	0	0	0	0	1	undefined	58de3af0eb71121000d36d61
	false	undefined	0							undefined	0	58de3bd9eb71121000d36f10		false	233038	439	109	0	0	0	0	1	undefined	58de3af0eb71121000d36d61
	false	undefined	0							undefined	0	58de3bd9eb71121000d36f11		false	233572	440	106	0	0	0	0	1	undefined	58de3af0eb71121000d36d61
	false	undefined	0							undefined	0	58de3bdaeb71121000d36f12		false	234084	441	108	0	0	0	0	1	undefined	58de3af0eb71121000d36d61
	false	undefined	0							undefined	0	58de3bdaeb71121000d36f13		false	234694	442	110	0	0	0	0	1	undefined	58de3af0eb71121000d36d61
	false	undefined	0							undefined	0	58de3bdbeb71121000d36f14		false	235160	443	111	0	0	0	0	1	undefined	58de3af0eb71121000d36d61
	false	undefined	0							undefined	0	58de3bdceb71121000d36f15		false	235787	444	116	0	0	0	0	1	undefined	58de3af0eb71121000d36d61
	false	undefined	0							undefined	0	58de3bdceb71121000d36f16		false	236304	445	117	0	0	0	0	1	undefined	58de3af0eb71121000d36d61
	false	undefined	0							undefined	0	58de3bddeb71121000d36f17		false	236920	446	116	0	0	0	0	1	undefined	58de3af0eb71121000d36d61
	false	undefined	0							undefined	0	58de3bddeb71121000d36f18		false	237423	447	114	0	0	0	0	1	undefined	58de3af0eb71121000d36d61
	false	undefined	0							undefined	0	58de3bdeeb71121000d36f19		false	237970	448	111	0	0	0	0	1	undefined	58de3af0eb71121000d36d61
	false	undefined	0							undefined	0	58de3bdeeb71121000d36f1a		false	238506	449	111	0	0	0	0	1	undefined	58de3af0eb71121000d36d61
	false	undefined	0							undefined	0	58de3bdfeb71121000d36f1b		false	238989	450	109	0	0	0	0	1	undefined	58de3af0eb71121000d36d61
	false	undefined	0							undefined	0	58de3bdfeb71121000d36f1c		false	239491	451	108	0	0	0	0	1	undefined	58de3af0eb71121000d36d61
	false	undefined	0							undefined	0	58de3be0eb71121000d36f1d		false	240030	452	110	0	0	0	0	1	undefined	58de3af0eb71121000d36d61
	false	undefined	0							undefined	0	58de3be0eb71121000d36f1e		false	240562	453	112	0	0	0	0	1	undefined	58de3af0eb71121000d36d61
	false	undefined	0							undefined	0	58de3be1eb71121000d36f1f		false	241100	454	113	0	0	0	0	1	undefined	58de3af0eb71121000d36d61
	false	undefined	0							undefined	0	58de3be1eb71121000d36f20		false	241600	455	113	0	0	0	0	1	undefined	58de3af0eb71121000d36d61
	false	undefined	0							undefined	0	58de3be2eb71121000d36f21		false	242127	456	111	0	0	0	0	1	undefined	58de3af0eb71121000d36d61
	false	undefined	0							undefined	0	58de3be2eb71121000d36f22		false	242661	457	116	0	0	0	0	1	undefined	58de3af0eb71121000d36d61
	false	undefined	0							undefined	0	58de3be3eb71121000d36f23		false	243194	458	116	0	0	0	0	1	undefined	58de3af0eb71121000d36d61
	false	undefined	0							undefined	0	58de3be3eb71121000d36f24		false	243728	459	116	0	0	0	0	1	undefined	58de3af0eb71121000d36d61
	false	undefined	0							undefined	0	58de3be4eb71121000d36f25		false	244236	460	116	0	0	0	0	1	undefined	58de3af0eb71121000d36d61
	false	undefined	0							undefined	0	58de3be5eb71121000d36f26		false	244791	461	105	0	0	0	0	1	undefined	58de3af0eb71121000d36d61
	false	undefined	0							undefined	0	58de3be5eb71121000d36f27		false	245323	462	111	0	0	0	0	1	undefined	58de3af0eb71121000d36d61
	false	undefined	0							undefined	0	58de3be6eb71121000d36f28		false	245916	463	113	0	0	0	0	1	undefined	58de3af0eb71121000d36d61
	false	undefined	0							undefined	0	58de3be6eb71121000d36f29		false	246456	464	112	0	0	0	0	1	undefined	58de3af0eb71121000d36d61
	false	undefined	0							undefined	0	58de3be7eb71121000d36f2a		false	246983	465	113	0	0	0	0	1	undefined	58de3af0eb71121000d36d61
	false	undefined	0							undefined	0	58de3be7eb71121000d36f2b		false	247537	466	112	0	0	0	0	1	undefined	58de3af0eb71121000d36d61
	false	undefined	0							undefined	0	58de3be8eb71121000d36f2c		false	248141	467	113	0	0	0	0	1	undefined	58de3af0eb71121000d36d61
	false	undefined	0							undefined	0	58de3be8eb71121000d36f2d		false	248563	468	112	0	0	0	0	1	undefined	58de3af0eb71121000d36d61
	false	undefined	0							undefined	0	58de3be9eb71121000d36f2e		false	249133	469	113	0	0	0	0	1	undefined	58de3af0eb71121000d36d61
	false	undefined	0							undefined	0	58de3be9eb71121000d36f2f		false	249672	470	113	0	0	0	0	1	undefined	58de3af0eb71121000d36d61
	false	undefined	0							undefined	0	58de3beaeb71121000d36f30		false	250140	471	109	0	0	0	0	1	undefined	58de3af0eb71121000d36d61
	false	undefined	0							undefined	0	58de3beaeb71121000d36f31		false	250651	472	107	0	0	0	0	1	undefined	58de3af0eb71121000d36d61
	false	undefined	0							undefined	0	58de3bebeb71121000d36f32		false	251265	473	110	0	0	0	0	1	undefined	58de3af0eb71121000d36d61
	false	undefined	0							undefined	0	58de3beceb71121000d36f33		false	251804	474	112	0	0	0	0	1	undefined	58de3af0eb71121000d36d61
	false	undefined	0							undefined	0	58de3beceb71121000d36f34		false	252315	475	114	0	0	0	0	1	undefined	58de3af0eb71121000d36d61
	false	undefined	0							undefined	0	58de3bedeb71121000d36f35		false	252860	476	115	0	0	0	0	1	undefined	58de3af0eb71121000d36d61
	false	undefined	0							undefined	0	58de3bedeb71121000d36f36		false	253410	477	116	0	0	0	0	1	undefined	58de3af0eb71121000d36d61
	false	undefined	0							undefined	0	58de3beeeb71121000d36f37		false	253943	478	116	0	0	0	0	1	undefined	58de3af0eb71121000d36d61
	false	undefined	0							undefined	0	58de3beeeb71121000d36f38		false	254465	479	115	0	0	0	0	1	undefined	58de3af0eb71121000d36d61
	false	undefined	0							undefined	0	58de3befeb71121000d36f39		false	255005	480	115	0	0	0	0	1	undefined	58de3af0eb71121000d36d61
	false	undefined	0							undefined	0	58de3befeb71121000d36f3a		false	255545	481	114	0	0	0	0	1	undefined	58de3af0eb71121000d36d61
	false	undefined	0							undefined	0	58de3bf0eb71121000d36f3b		false	256062	482	113	0	0	0	0	1	undefined	58de3af0eb71121000d36d61
	false	undefined	0							undefined	0	58de3bf0eb71121000d36f3c		false	256612	483	113	0	0	0	0	1	undefined	58de3af0eb71121000d36d61
	false	undefined	0							undefined	0	58de3bf1eb71121000d36f3d		false	257122	484	113	0	0	0	0	1	undefined	58de3af0eb71121000d36d61
	false	undefined	0							undefined	0	58de3bf1eb71121000d36f3e		false	257628	485	114	0	0	0	0	1	undefined	58de3af0eb71121000d36d61
	false	undefined	0							undefined	0	58de3bf2eb71121000d36f3f		false	258221	486	116	0	0	0	0	1	undefined	58de3af0eb71121000d36d61
	false	undefined	0							undefined	0	58de3bf2eb71121000d36f40		false	258694	487	114	0	0	0	0	1	undefined	58de3af0eb71121000d36d61
	false	undefined	0							undefined	0	58de3bf3eb71121000d36f41		false	259216	488	115	0	0	0	0	1	undefined	58de3af0eb71121000d36d61
	false	undefined	0							undefined	0	58de3bf3eb71121000d36f42		false	259742	489	115	0	0	0	0	1	undefined	58de3af0eb71121000d36d61
	false	undefined	0							undefined	0	58de3bf4eb71121000d36f43		false	260280	490	108	0	0	0	0	1	undefined	58de3af0eb71121000d36d61
	false	undefined	0							undefined	0	58de3bf5eb71121000d36f44		false	260825	491	108	0	0	0	0	1	undefined	58de3af0eb71121000d36d61
	false	undefined	0							undefined	0	58de3bf5eb71121000d36f45		false	261345	492	112	0	0	0	0	1	undefined	58de3af0eb71121000d36d61
	false	undefined	0							undefined	0	58de3bf6eb71121000d36f46		false	261887	493	115	0	0	0	0	1	undefined	58de3af0eb71121000d36d61
	false	undefined	0							undefined	0	58de3bf6eb71121000d36f47		false	262492	494	115	0	0	0	0	1	undefined	58de3af0eb71121000d36d61
	false	undefined	0							undefined	0	58de3bf7eb71121000d36f48		false	263039	495	114	0	0	0	0	1	undefined	58de3af0eb71121000d36d61
	false	undefined	0							undefined	0	58de3bf7eb71121000d36f49		true	263503	496	114	0	0	0	0	1	undefined	58de3af0eb71121000d36d61
	false	undefined	0							undefined	0	58de3bf8eb71121000d36f4a		false	264037	497	117	0	0	0	0	1	undefined	58de3af0eb71121000d36d61
	false	undefined	0							undefined	0	58de3bf8eb71121000d36f4b		false	264553	498	119	0	0	0	0	1	undefined	58de3af0eb71121000d36d61
	false	undefined	0							undefined	0	58de3bf9eb71121000d36f4c		false	265098	499	119	0	0	0	0	1	undefined	58de3af0eb71121000d36d61
	false	undefined	0							undefined	0	58de3bf9eb71121000d36f4d		false	265634	500	119	0	0	0	0	1	undefined	58de3af0eb71121000d36d61
	false	undefined	0							undefined	0	58de3bfaeb71121000d36f4e		false	266156	501	119	0	0	0	0	1	undefined	58de3af0eb71121000d36d61
	false	undefined	0							undefined	0	58de3bfaeb71121000d36f4f		false	266682	502	115	0	0	0	0	1	undefined	58de3af0eb71121000d36d61
	false	undefined	0							undefined	0	58de3bfbeb71121000d36f50		false	267227	503	112	0	0	0	0	1	undefined	58de3af0eb71121000d36d61
	false	undefined	0							undefined	0	58de3bfbeb71121000d36f51		false	267755	504	-1	0	0	0	0	1	undefined	58de3af0eb71121000d36d61
	false	undefined	0							undefined	0	58de3bfceb71121000d36f52		false	268254	505	-1	0	0	0	0	1	undefined	58de3af0eb71121000d36d61
	false	undefined	0							undefined	0	58de3bfdeb71121000d36f53		false	268822	506	-1	0	0	0	0	1	undefined	58de3af0eb71121000d36d61
	false	undefined	0							undefined	0	58de3bfdeb71121000d36f54		false	269369	510	-1	0	0	0	0	1	undefined	58de3af0eb71121000d36d61
	false	undefined	0							undefined	0	58de3bfeeb71121000d36f55		false	269871	511	-1	0	0	0	0	1	undefined	58de3af0eb71121000d36d61
	false	undefined	0							undefined	0	58de3bfeeb71121000d36f56		false	270434	512	-1	0	0	0	0	1	undefined	58de3af0eb71121000d36d61
	false	undefined	0							undefined	0	58de3bffeb71121000d36f57		false	270961	513	-1	0	0	0	0	1	undefined	58de3af0eb71121000d36d61
	false	undefined	0							undefined	0	58de3bffeb71121000d36f58		false	271499	514	-1	0	0	0	0	1	undefined	58de3af0eb71121000d36d61
	false	undefined	0							undefined	0	58de3c00eb71121000d36f59		false	272045	515	-1	0	0	0	0	1	undefined	58de3af0eb71121000d36d61
	false	undefined	0							undefined	0	58de3c00eb71121000d36f5a		false	272565	516	-1	0	0	0	0	1	undefined	58de3af0eb71121000d36d61
	false	undefined	0							undefined	0	58de3c01eb71121000d36f5b		false	273103	517	-1	0	0	0	0	1	undefined	58de3af0eb71121000d36d61
	false	undefined	0							undefined	0	58de3c01eb71121000d36f5c		false	273662	518	-1	0	0	0	0	1	undefined	58de3af0eb71121000d36d61
	false	undefined	0							undefined	0	58de3c02eb71121000d36f5d		true	274170	519	119	0	0	0	0	1	undefined	58de3af0eb71121000d36d61
	false	undefined	0							undefined	0	58de3c02eb71121000d36f5e		false	274716	520	117	0	0	0	0	1	undefined	58de3af0eb71121000d36d61
	false	undefined	0							undefined	0	58de3c03eb71121000d36f5f		false	275258	521	109	0	0	0	0	1	undefined	58de3af0eb71121000d36d61
	false	undefined	0							undefined	0	58de3c04eb71121000d36f60		false	275860	525	119	0	0	0	0	1	undefined	58de3af0eb71121000d36d61
	false	undefined	0							undefined	0	58de3c04eb71121000d36f61		false	276382	526	116	0	0	0	0	1	undefined	58de3af0eb71121000d36d61
	false	undefined	0							undefined	0	58de3c05eb71121000d36f62		false	276926	527	115	0	0	0	0	1	undefined	58de3af0eb71121000d36d61
	false	undefined	0							undefined	0	58de3c05eb71121000d36f63		false	277524	528	116	0	0	0	0	1	undefined	58de3af0eb71121000d36d61
	false	undefined	0							undefined	0	58de3c06eb71121000d36f64		false	278043	529	116	0	0	0	0	1	undefined	58de3af0eb71121000d36d61
	false	undefined	0							undefined	0	58de3c06eb71121000d36f65		false	278576	530	118	0	0	0	0	1	undefined	58de3af0eb71121000d36d61
	false	undefined	0							undefined	0	58de3c07eb71121000d36f66		false	279116	531	116	0	0	0	0	1	undefined	58de3af0eb71121000d36d61
	false	undefined	0							undefined	0	58de3c07eb71121000d36f67		false	279652	532	116	0	0	0	0	1	undefined	58de3af0eb71121000d36d61
	false	undefined	0							undefined	0	58de3c08eb71121000d36f68		false	280177	533	116	0	0	0	0	1	undefined	58de3af0eb71121000d36d61
	false	undefined	0							undefined	0	58de3c08eb71121000d36f69		false	280733	534	113	0	0	0	0	1	undefined	58de3af0eb71121000d36d61
	false	undefined	0							undefined	0	58de3c09eb71121000d36f6a		false	281359	535	114	0	0	0	0	1	undefined	58de3af0eb71121000d36d61
	false	undefined	0							undefined	0	58de3c0aeb71121000d36f6b		false	281857	536	114	0	0	0	0	1	undefined	58de3af0eb71121000d36d61
	false	undefined	0							undefined	0	58de3c0aeb71121000d36f6c		false	282394	537	115	0	0	0	0	1	undefined	58de3af0eb71121000d36d61
	false	undefined	0							undefined	0	58de3c0beb71121000d36f6d		false	282864	538	112	0	0	0	0	1	undefined	58de3af0eb71121000d36d61
	false	undefined	0							undefined	0	58de3c0beb71121000d36f6e		false	283472	539	115	0	0	0	0	1	undefined	58de3af0eb71121000d36d61
	false	undefined	0							undefined	0	58de3c0ceb71121000d36f6f		false	284051	540	116	0	0	0	0	1	undefined	58de3af0eb71121000d36d61
	false	undefined	0							undefined	0	58de3c0ceb71121000d36f70		false	284584	541	113	0	0	0	0	1	undefined	58de3af0eb71121000d36d61
	false	undefined	0							undefined	0	58de3c0deb71121000d36f71		true	285122	542	112	0	0	0	0	1	undefined	58de3af0eb71121000d36d61
	false	undefined	0							undefined	0	58de3c0deb71121000d36f72		false	285652	543	113	0	0	0	0	1	undefined	58de3af0eb71121000d36d61
	false	undefined	0							undefined	0	58de3c0eeb71121000d36f73		false	286200	544	115	0	0	0	0	1	undefined	58de3af0eb71121000d36d61
	false	undefined	0							undefined	0	58de3c0eeb71121000d36f74		false	286741	545	115	0	0	0	0	1	undefined	58de3af0eb71121000d36d61
	false	undefined	0							undefined	0	58de3c0feb71121000d36f75		false	287272	546	116	0	0	0	0	1	undefined	58de3af0eb71121000d36d61
	false	undefined	0							undefined	0	58de3c0feb71121000d36f76		true	287801	547	116	0	0	0	0	1	undefined	58de3af0eb71121000d36d61
	false	undefined	0							undefined	0	58de3c10eb71121000d36f77		true	288296	548	-1	0	0	0	0	1	undefined	58de3af0eb71121000d36d61
	false	undefined	0							undefined	0	58de3c11eb71121000d36f78		true	288867	549	-1	0	0	0	0	1	undefined	58de3af0eb71121000d36d61
	false	undefined	0							undefined	0	58de3c11eb71121000d36f79		true	289346	550	-1	0	0	0	0	1	undefined	58de3af0eb71121000d36d61
	false	undefined	0							undefined	0	58de3c12eb71121000d36f7a		true	289953	554	-1	0	0	0	0	1	undefined	58de3af0eb71121000d36d61
	false	undefined	0							undefined	0	58de3c12eb71121000d36f7b		false	290437	555	-1	0	0	0	0	1	undefined	58de3af0eb71121000d36d61
	false	undefined	0							undefined	0	58de3c13eb71121000d36f7c		false	291001	556	-1	0	0	0	0	1	undefined	58de3af0eb71121000d36d61
	false	undefined	0							undefined	0	58de3c13eb71121000d36f7d		false	291494	557	-1	0	0	0	0	1	undefined	58de3af0eb71121000d36d61
	false	undefined	0							undefined	0	58de3c14eb71121000d36f7e		false	292084	558	-1	0	0	0	0	1	undefined	58de3af0eb71121000d36d61
	false	undefined	0							undefined	0	58de3c14eb71121000d36f7f		false	292618	559	-1	0	0	0	0	1	undefined	58de3af0eb71121000d36d61
	false	undefined	0							undefined	0	58de3c15eb71121000d36f80		false	293151	560	-1	0	0	0	0	1	undefined	58de3af0eb71121000d36d61
	false	undefined	0							undefined	0	58de3c15eb71121000d36f81		false	293684	561	-1	0	0	0	0	1	undefined	58de3af0eb71121000d36d61
	false	undefined	0							undefined	0	58de3c16eb71121000d36f82		false	294188	562	-1	0	0	0	0	1	undefined	58de3af0eb71121000d36d61
	false	undefined	0							undefined	0	58de3c17eb71121000d36f83		false	294757	563	-1	0	0	0	0	1	undefined	58de3af0eb71121000d36d61
	false	undefined	0							undefined	0	58de3c17eb71121000d36f84		false	295284	564	-1	0	0	0	0	1	undefined	58de3af0eb71121000d36d61
	false	undefined	0							undefined	0	58de3c18eb71121000d36f85		false	295818	565	-1	0	0	0	0	1	undefined	58de3af0eb71121000d36d61
	false	undefined	0							undefined	0	58de3c18eb71121000d36f86		false	296359	566	-1	0	0	0	0	1	undefined	58de3af0eb71121000d36d61
	false	undefined	0							undefined	0	58de3c19eb71121000d36f87		false	296885	567	-1	0	0	0	0	1	undefined	58de3af0eb71121000d36d61
	false	undefined	0							undefined	0	58de3c19eb71121000d36f88		false	297414	568	-1	0	0	0	0	1	undefined	58de3af0eb71121000d36d61
	false	undefined	0							undefined	0	58de3c1aeb71121000d36f89		false	297950	569	-1	0	0	0	0	1	undefined	58de3af0eb71121000d36d61
	false	undefined	0							undefined	0	58de3c1aeb71121000d36f8a		false	298552	570	-1	0	0	0	0	1	undefined	58de3af0eb71121000d36d61
	false	undefined	0							undefined	0	58de3c1beb71121000d36f8b		false	299046	571	-1	0	0	0	0	1	undefined	58de3af0eb71121000d36d61
	false	undefined	0							undefined	0	58de3c1beb71121000d36f8c		false	299641	572	-1	0	0	0	0	1	undefined	58de3af0eb71121000d36d61
	false	undefined	0							undefined	0	58de3c1ceb71121000d36f8d		false	300219	573	-1	0	0	0	0	1	undefined	58de3af0eb71121000d36d61
	false	undefined	0							undefined	0	58de3c1ceb71121000d36f8e		false	300711	574	-1	0	0	0	0	1	undefined	58de3af0eb71121000d36d61
	false	undefined	0							undefined	0	58de3c1deb71121000d36f8f		true	301300	575	-1	0	0	0	0	1	undefined	58de3af0eb71121000d36d61
	false	undefined	0							undefined	0	58de3c1eeb71121000d36f90		true	301821	576	-1	0	0	0	0	1	undefined	58de3af0eb71121000d36d61
	false	undefined	0							undefined	0	58de3c1eeb71121000d36f91		true	302374	577	-1	0	0	0	0	1	undefined	58de3af0eb71121000d36d61
	false	undefined	0							undefined	0	58de3c1feb71121000d36f92		true	302901	578	-1	0	0	0	0	1	undefined	58de3af0eb71121000d36d61
	false	undefined	0							undefined	0	58de3c1feb71121000d36f93		false	303433	579	-1	0	0	0	0	1	undefined	58de3af0eb71121000d36d61
	false	undefined	0							undefined	0	58de3c20eb71121000d36f94		false	303974	580	-1	0	0	0	0	1	undefined	58de3af0eb71121000d36d61
	false	undefined	0							undefined	0	58de3c20eb71121000d36f95		false	304503	581	-1	0	0	0	0	1	undefined	58de3af0eb71121000d36d61
	false	undefined	0							undefined	0	58de3c21eb71121000d36f96		false	305044	582	-1	0	0	0	0	1	undefined	58de3af0eb71121000d36d61
	false	undefined	0							undefined	0	58de3c21eb71121000d36f97		true	305578	583	-1	0	0	0	0	1	undefined	58de3af0eb71121000d36d61
	false	undefined	0							undefined	0	58de3c22eb71121000d36f98		false	306164	587	-1	0	0	0	0	1	undefined	58de3af0eb71121000d36d61
	false	undefined	0							undefined	0	58de3c22eb71121000d36f99		false	306701	588	-1	0	0	0	0	1	undefined	58de3af0eb71121000d36d61
	false	undefined	0							undefined	0	58de3c23eb71121000d36f9a		false	307246	589	-1	0	0	0	0	1	undefined	58de3af0eb71121000d36d61
	false	undefined	0							undefined	0	58de3c23eb71121000d36f9b		false	307785	590	-1	0	0	0	0	1	undefined	58de3af0eb71121000d36d61
	false	undefined	0							undefined	0	58de3c24eb71121000d36f9c		false	308311	591	-1	0	0	0	0	1	undefined	58de3af0eb71121000d36d61
	false	undefined	0							undefined	0	58de3c25eb71121000d36f9d		false	308846	592	-1	0	0	0	0	1	undefined	58de3af0eb71121000d36d61
	false	undefined	0							undefined	0	58de3c25eb71121000d36f9e		false	309337	593	-1	0	0	0	0	1	undefined	58de3af0eb71121000d36d61
	false	undefined	0							undefined	0	58de3c26eb71121000d36f9f		true	309911	594	-1	0	0	0	0	1	undefined	58de3af0eb71121000d36d61
	false	undefined	0							undefined	0	58de3c26eb71121000d36fa0		false	310376	595	-1	0	0	0	0	1	undefined	58de3af0eb71121000d36d61
	false	undefined	0							undefined	0	58de3c27eb71121000d36fa1		false	310996	596	-1	0	0	0	0	1	undefined	58de3af0eb71121000d36d61
	false	undefined	0							undefined	0	58de3c27eb71121000d36fa2		false	311509	597	-1	0	0	0	0	1	undefined	58de3af0eb71121000d36d61
	false	undefined	0							undefined	0	58de3c28eb71121000d36fa3		false	312074	598	-1	0	0	0	0	1	undefined	58de3af0eb71121000d36d61
	false	undefined	0							undefined	0	58de3c28eb71121000d36fa4		false	312642	599	-1	0	0	0	0	1	undefined	58de3af0eb71121000d36d61
	false	undefined	0							undefined	0	58de3c29eb71121000d36fa5		false	313194	600	-1	0	0	0	0	1	undefined	58de3af0eb71121000d36d61
	false	undefined	0							undefined	0	58de3c29eb71121000d36fa6		false	313725	601	-1	0	0	0	0	1	undefined	58de3af0eb71121000d36d61
	false	undefined	0							undefined	0	58de3c2aeb71121000d36fa7		false	314256	602	-1	0	0	0	0	1	undefined	58de3af0eb71121000d36d61
	false	undefined	0							undefined	0	58de3c2aeb71121000d36fa8		false	314789	603	-1	0	0	0	0	1	undefined	58de3af0eb71121000d36d61
	false	undefined	0							undefined	0	58de3c2beb71121000d36fa9		false	315325	604	-1	0	0	0	0	1	undefined	58de3af0eb71121000d36d61
	false	undefined	0							undefined	0	58de3c2ceb71121000d36faa		false	315854	605	-1	0	0	0	0	1	undefined	58de3af0eb71121000d36d61
	false	undefined	0							undefined	0	58de3c2ceb71121000d36fab		false	316414	606	-1	0	0	0	0	1	undefined	58de3af0eb71121000d36d61
	false	undefined	0							undefined	0	58de3c2deb71121000d36fac		false	316919	607	-1	0	0	0	0	1	undefined	58de3af0eb71121000d36d61
	false	undefined	0							undefined	0	58de3c2deb71121000d36fad		true	317386	608	114	0	0	0	0	1	undefined	58de3af0eb71121000d36d61
	false	undefined	0							undefined	0	58de3c2eeb71121000d36fae		true	318004	609	99	0	0	0	0	1	undefined	58de3af0eb71121000d36d61
	false	undefined	0							undefined	0	58de3c2eeb71121000d36faf		false	318536	610	86	0	0	0	0	1	undefined	58de3af0eb71121000d36d61
	false	undefined	0							undefined	0	58de3c2feb71121000d36fb0		false	319073	614	118	0	0	0	0	1	undefined	58de3af0eb71121000d36d61
	false	undefined	0							undefined	0	58de3c2feb71121000d36fb1		false	319607	615	120	0	0	0	0	1	undefined	58de3af0eb71121000d36d61
	false	undefined	0							undefined	0	58de3c30eb71121000d36fb2		false	320135	616	122	0	0	0	0	1	undefined	58de3af0eb71121000d36d61
	false	undefined	0							undefined	0	58de3c30eb71121000d36fb3		false	320665	617	123	0	0	0	0	1	undefined	58de3af0eb71121000d36d61
	false	undefined	0							undefined	0	58de3c31eb71121000d36fb4		false	321226	618	120	0	0	0	0	1	undefined	58de3af0eb71121000d36d61
	false	undefined	0							undefined	0	58de3c31eb71121000d36fb5		false	321740	619	122	0	0	0	0	1	undefined	58de3af0eb71121000d36d61
	false	undefined	0							undefined	0	58de3c32eb71121000d36fb6		false	322263	620	123	0	0	0	0	1	undefined	58de3af0eb71121000d36d61
	false	undefined	0							undefined	0	58de3c32eb71121000d36fb7		false	322801	621	122	0	0	0	0	1	undefined	58de3af0eb71121000d36d61
	false	undefined	0							undefined	0	58de3c33eb71121000d36fb8		false	323350	622	121	0	0	0	0	1	undefined	58de3af0eb71121000d36d61
	false	undefined	0							undefined	0	58de3c34eb71121000d36fb9		false	323865	623	118	0	0	0	0	1	undefined	58de3af0eb71121000d36d61
	false	undefined	0							undefined	0	58de3c34eb71121000d36fba		false	324419	624	120	0	0	0	0	1	undefined	58de3af0eb71121000d36d61
	false	undefined	0							undefined	0	58de3c35eb71121000d36fbb		false	324899	625	119	0	0	0	0	1	undefined	58de3af0eb71121000d36d61
	false	undefined	0							undefined	0	58de3c35eb71121000d36fbc		false	325480	626	119	0	0	0	0	1	undefined	58de3af0eb71121000d36d61
	false	undefined	0							undefined	0	58de3c36eb71121000d36fbd		false	326017	627	120	0	0	0	0	1	undefined	58de3af0eb71121000d36d61
	false	undefined	0							undefined	0	58de3c36eb71121000d36fbe		false	326486	628	118	0	0	0	0	1	undefined	58de3af0eb71121000d36d61
	false	undefined	0							undefined	0	58de3c37eb71121000d36fbf		false	327015	629	118	0	0	0	0	1	undefined	58de3af0eb71121000d36d61
	false	undefined	0							undefined	0	58de3c37eb71121000d36fc0		false	327635	630	118	0	0	0	0	1	undefined	58de3af0eb71121000d36d61
	false	undefined	0							undefined	0	58de3c38eb71121000d36fc1		false	328082	631	115	0	0	0	0	1	undefined	58de3af0eb71121000d36d61
	false	undefined	0							undefined	0	58de3c38eb71121000d36fc2		false	328690	632	117	0	0	0	0	1	undefined	58de3af0eb71121000d36d61
	false	undefined	0							undefined	0	58de3c39eb71121000d36fc3		false	329206	633	118	0	0	0	0	1	undefined	58de3af0eb71121000d36d61
	false	undefined	0							undefined	0	58de3c39eb71121000d36fc4		false	329771	634	120	0	0	0	0	1	undefined	58de3af0eb71121000d36d61
	false	undefined	0							undefined	0	58de3c3aeb71121000d36fc5		false	330238	635	120	0	0	0	0	1	undefined	58de3af0eb71121000d36d61
	false	undefined	0							undefined	0	58de3c3beb71121000d36fc6		false	330836	636	118	0	0	0	0	1	undefined	58de3af0eb71121000d36d61
	false	undefined	0							undefined	0	58de3c3beb71121000d36fc7		false	331354	637	117	0	0	0	0	1	undefined	58de3af0eb71121000d36d61
	false	undefined	0							undefined	0	58de3c3ceb71121000d36fc8		false	331887	638	114	0	0	0	0	1	undefined	58de3af0eb71121000d36d61
	false	undefined	0							undefined	0	58de3c3ceb71121000d36fc9		false	332428	639	117	0	0	0	0	1	undefined	58de3af0eb71121000d36d61
	false	undefined	0							undefined	0	58de3c3deb71121000d36fca		false	332954	640	121	0	0	0	0	1	undefined	58de3af0eb71121000d36d61
	false	undefined	0							undefined	0	58de3c3deb71121000d36fcb		false	333486	641	122	0	0	0	0	1	undefined	58de3af0eb71121000d36d61
	false	undefined	0							undefined	0	58de3c3eeb71121000d36fcc		false	334025	642	122	0	0	0	0	1	undefined	58de3af0eb71121000d36d61
	false	undefined	0							undefined	0	58de3c3eeb71121000d36fcd		false	334554	643	123	0	0	0	0	1	undefined	58de3af0eb71121000d36d61
	false	undefined	0							undefined	0	58de3c3feb71121000d36fce		false	335090	644	121	0	0	0	0	1	undefined	58de3af0eb71121000d36d61
	false	undefined	0							undefined	0	58de3c3feb71121000d36fcf		false	335641	645	120	0	0	0	0	1	undefined	58de3af0eb71121000d36d61
	false	undefined	0							undefined	0	58de3c40eb71121000d36fd0		false	336168	646	120	0	0	0	0	1	undefined	58de3af0eb71121000d36d61
	false	undefined	0							undefined	0	58de3c40eb71121000d36fd1		false	336701	647	121	0	0	0	0	1	undefined	58de3af0eb71121000d36d61
	false	undefined	0							undefined	0	58de3c41eb71121000d36fd2		false	337154	648	118	0	0	0	0	1	undefined	58de3af0eb71121000d36d61
	false	undefined	0							undefined	0	58de3c42eb71121000d36fd3		false	337834	649	116	0	0	0	0	1	undefined	58de3af0eb71121000d36d61
	false	undefined	0							undefined	0	58de3c42eb71121000d36fd4		false	338436	650	117	0	0	0	0	1	undefined	58de3af0eb71121000d36d61
	false	undefined	0							undefined	0	58de3c43eb71121000d36fd5		false	338965	651	121	0	0	0	0	1	undefined	58de3af0eb71121000d36d61
	false	undefined	0							undefined	0	58de3c43eb71121000d36fd6		false	339428	652	119	0	0	0	0	1	undefined	58de3af0eb71121000d36d61
	false	undefined	0							undefined	0	58de3c44eb71121000d36fd7		false	339977	653	118	0	0	0	0	1	undefined	58de3af0eb71121000d36d61
	false	undefined	0							undefined	0	58de3c44eb71121000d36fd8		false	340565	654	121	0	0	0	0	1	undefined	58de3af0eb71121000d36d61
	false	undefined	0							undefined	0	58de3c45eb71121000d36fd9		false	341098	655	121	0	0	0	0	1	undefined	58de3af0eb71121000d36d61
	false	undefined	0							undefined	0	58de3c45eb71121000d36fda		false	341653	656	120	0	0	0	0	1	undefined	58de3af0eb71121000d36d61
	false	undefined	0							undefined	0	58de3c46eb71121000d36fdb		false	342169	657	116	0	0	0	0	1	undefined	58de3af0eb71121000d36d61
	false	undefined	0							undefined	0	58de3c46eb71121000d36fdc		false	342645	658	117	0	0	0	0	1	undefined	58de3af0eb71121000d36d61
	false	undefined	0							undefined	0	58de3c47eb71121000d36fdd		false	343248	659	120	0	0	0	0	1	undefined	58de3af0eb71121000d36d61
	false	undefined	0							undefined	0	58de3c47eb71121000d36fde		false	343773	660	119	0	0	0	0	1	undefined	58de3af0eb71121000d36d61
	false	undefined	0							undefined	0	58de3c48eb71121000d36fdf		false	344244	661	116	0	0	0	0	1	undefined	58de3af0eb71121000d36d61
	false	undefined	0							undefined	0	58de3c49eb71121000d36fe0		false	344851	662	119	0	0	0	0	1	undefined	58de3af0eb71121000d36d61
	false	undefined	0							undefined	0	58de3c49eb71121000d36fe1		false	345376	663	118	0	0	0	0	1	undefined	58de3af0eb71121000d36d61
	false	undefined	0							undefined	0	58de3c4aeb71121000d36fe2		false	345908	664	120	0	0	0	0	1	undefined	58de3af0eb71121000d36d61
	false	undefined	0							undefined	0	58de3c4aeb71121000d36fe3		false	346457	665	118	0	0	0	0	1	undefined	58de3af0eb71121000d36d61
	false	undefined	0							undefined	0	58de3c4beb71121000d36fe4		false	347011	666	119	0	0	0	0	1	undefined	58de3af0eb71121000d36d61
	false	undefined	0							undefined	0	58de3c4beb71121000d36fe5		false	347511	667	122	0	0	0	0	1	undefined	58de3af0eb71121000d36d61
	false	undefined	0							undefined	0	58de3c4ceb71121000d36fe6		false	348066	668	119	0	0	0	0	1	undefined	58de3af0eb71121000d36d61
	false	undefined	0							undefined	0	58de3c4ceb71121000d36fe7		false	348593	669	119	0	0	0	0	1	undefined	58de3af0eb71121000d36d61
	false	undefined	0							undefined	0	58de3c4deb71121000d36fe8		false	349126	670	119	0	0	0	0	1	undefined	58de3af0eb71121000d36d61
	false	undefined	0							undefined	0	58de3c4deb71121000d36fe9		false	349592	671	118	0	0	0	0	1	undefined	58de3af0eb71121000d36d61
	false	undefined	0							undefined	0	58de3c4eeb71121000d36fea		false	350192	672	119	0	0	0	0	1	undefined	58de3af0eb71121000d36d61
	false	undefined	0							undefined	0	58de3c4eeb71121000d36feb		false	350727	673	118	0	0	0	0	1	undefined	58de3af0eb71121000d36d61
	false	undefined	0							undefined	0	58de3c4feb71121000d36fec		false	351257	674	120	0	0	0	0	1	undefined	58de3af0eb71121000d36d61
	false	undefined	0							undefined	0	58de3c50eb71121000d36fed		false	351790	675	120	0	0	0	0	1	undefined	58de3af0eb71121000d36d61
	false	undefined	0							undefined	0	58de3c50eb71121000d36fee		false	352323	676	120	0	0	0	0	1	undefined	58de3af0eb71121000d36d61
	false	undefined	0							undefined	0	58de3c51eb71121000d36fef		false	352822	677	120	0	0	0	0	1	undefined	58de3af0eb71121000d36d61
	false	undefined	0							undefined	0	58de3c51eb71121000d36ff0		false	353391	678	117	0	0	0	0	1	undefined	58de3af0eb71121000d36d61
	false	undefined	0							undefined	0	58de3c52eb71121000d36ff1		false	353882	679	118	0	0	0	0	1	undefined	58de3af0eb71121000d36d61
	false	undefined	0							undefined	0	58de3c52eb71121000d36ff2		false	354485	680	117	0	0	0	0	1	undefined	58de3af0eb71121000d36d61
	false	undefined	0							undefined	0	58de3c53eb71121000d36ff3		false	355006	681	117	0	0	0	0	1	undefined	58de3af0eb71121000d36d61
	false	undefined	0							undefined	0	58de3c53eb71121000d36ff4		false	355539	682	119	0	0	0	0	1	undefined	58de3af0eb71121000d36d61
	false	undefined	0							undefined	0	58de3c54eb71121000d36ff5		false	356031	683	118	0	0	0	0	1	undefined	58de3af0eb71121000d36d61
	false	undefined	0							undefined	0	58de3c54eb71121000d36ff6		false	356607	684	117	0	0	0	0	1	undefined	58de3af0eb71121000d36d61
	false	undefined	0							undefined	0	58de3c55eb71121000d36ff7		false	357137	685	120	0	0	0	0	1	undefined	58de3af0eb71121000d36d61
	false	undefined	0							undefined	0	58de3c55eb71121000d36ff8		false	357670	686	123	0	0	0	0	1	undefined	58de3af0eb71121000d36d61
	false	undefined	0							undefined	0	58de3c56eb71121000d36ff9		false	358204	687	123	0	0	0	0	1	undefined	58de3af0eb71121000d36d61
	false	undefined	0							undefined	0	58de3c56eb71121000d36ffa		false	358740	688	122	0	0	0	0	1	undefined	58de3af0eb71121000d36d61
	false	undefined	0							undefined	0	58de3c57eb71121000d36ffb		false	359202	689	119	0	0	0	0	1	undefined	58de3af0eb71121000d36d61
	false	undefined	0							undefined	0	58de3c57eb71121000d36ffc		false	359737	690	120	0	0	0	0	1	undefined	58de3af0eb71121000d36d61
	false	undefined	0							undefined	0	58de3c58eb71121000d36ffd		false	360272	691	121	0	0	0	0	1	undefined	58de3af0eb71121000d36d61
	false	undefined	0							undefined	0	58de3c59eb71121000d36ffe		false	360833	692	121	0	0	0	0	1	undefined	58de3af0eb71121000d36d61
	false	undefined	0							undefined	0	58de3c59eb71121000d36fff		true	361352	693	121	0	0	0	0	1	undefined	58de3af0eb71121000d36d61
	false	undefined	0							undefined	0	58de3c5aeb71121000d37000		false	361842	694	120	0	0	0	0	1	undefined	58de3af0eb71121000d36d61
	false	undefined	0							undefined	0	58de3c5aeb71121000d37001		false	362419	695	119	0	0	0	0	1	undefined	58de3af0eb71121000d36d61
	false	undefined	0							undefined	0	58de3c5beb71121000d37002		false	362958	696	119	0	0	0	0	1	undefined	58de3af0eb71121000d36d61
	false	undefined	0							undefined	0	58de3c5beb71121000d37003		false	363484	697	121	0	0	0	0	1	undefined	58de3af0eb71121000d36d61
	false	undefined	0							undefined	0	58de3c5ceb71121000d37004		false	364017	698	121	0	0	0	0	1	undefined	58de3af0eb71121000d36d61
	false	undefined	0							undefined	0	58de3c5ceb71121000d37005		false	364552	699	121	0	0	0	0	1	undefined	58de3af0eb71121000d36d61
	false	undefined	0							undefined	0	58de3c5deb71121000d37006		false	365017	700	119	0	0	0	0	1	undefined	58de3af0eb71121000d36d61
	false	undefined	0							undefined	0	58de3c5deb71121000d37007		false	365635	701	121	0	0	0	0	1	undefined	58de3af0eb71121000d36d61
	false	undefined	0							undefined	0	58de3c5eeb71121000d37008		false	366150	702	121	0	0	0	0	1	undefined	58de3af0eb71121000d36d61
	false	undefined	0							undefined	0	58de3c5eeb71121000d37009		false	366689	703	119	0	0	0	0	1	undefined	58de3af0eb71121000d36d61
	false	undefined	0							undefined	0	58de3c5feb71121000d3700a		false	367221	704	120	0	0	0	0	1	undefined	58de3af0eb71121000d36d61
	false	undefined	0							undefined	0	58de3c5feb71121000d3700b		false	367706	705	118	0	0	0	0	1	undefined	58de3af0eb71121000d36d61
	false	undefined	0							undefined	0	58de3c60eb71121000d3700c		false	368298	706	121	0	0	0	0	1	undefined	58de3af0eb71121000d36d61
	false	undefined	0							undefined	0	58de3c61eb71121000d3700d		false	368832	707	120	0	0	0	0	1	undefined	58de3af0eb71121000d36d61
	false	undefined	0							undefined	0	58de3c61eb71121000d3700e		false	369364	708	120	0	0	0	0	1	undefined	58de3af0eb71121000d36d61
	false	undefined	0							undefined	0	58de3c62eb71121000d3700f		false	369853	709	121	0	0	0	0	1	undefined	58de3af0eb71121000d36d61
	false	undefined	0							undefined	0	58de3c62eb71121000d37010		false	370430	710	120	0	0	0	0	1	undefined	58de3af0eb71121000d36d61
	false	undefined	0							undefined	0	58de3c63eb71121000d37011		false	370963	711	120	0	0	0	0	1	undefined	58de3af0eb71121000d36d61
	false	undefined	0							undefined	0	58de3c63eb71121000d37012		false	371495	712	117	0	0	0	0	1	undefined	58de3af0eb71121000d36d61
	false	undefined	0							undefined	0	58de3c64eb71121000d37013		false	372029	713	118	0	0	0	0	1	undefined	58de3af0eb71121000d36d61
	false	undefined	0							undefined	0	58de3c64eb71121000d37014		false	372564	714	119	0	0	0	0	1	undefined	58de3af0eb71121000d36d61
	false	undefined	0							undefined	0	58de3c65eb71121000d37015		false	373029	715	117	0	0	0	0	1	undefined	58de3af0eb71121000d36d61
	false	undefined	0							undefined	0	58de3c65eb71121000d37016		false	373644	716	120	0	0	0	0	1	undefined	58de3af0eb71121000d36d61
	false	undefined	0							undefined	0	58de3c66eb71121000d37017		false	374179	717	120	0	0	0	0	1	undefined	58de3af0eb71121000d36d61
	false	undefined	0							undefined	0	58de3c66eb71121000d37018		false	374711	718	117	0	0	0	0	1	undefined	58de3af0eb71121000d36d61
	false	undefined	0							undefined	0	58de3c67eb71121000d37019		false	375255	719	114	0	0	0	0	1	undefined	58de3af0eb71121000d36d61
	false	undefined	0							undefined	0	58de3c67eb71121000d3701a		false	375777	720	114	0	0	0	0	1	undefined	58de3af0eb71121000d36d61
	false	undefined	0							undefined	0	58de3c68eb71121000d3701b		false	376311	721	117	0	0	0	0	1	undefined	58de3af0eb71121000d36d61
	false	undefined	0							undefined	0	58de3c69eb71121000d3701c		false	376843	722	116	0	0	0	0	1	undefined	58de3af0eb71121000d36d61
	false	undefined	0							undefined	0	58de3c69eb71121000d3701d		false	377339	723	115	0	0	0	0	1	undefined	58de3af0eb71121000d36d61
	false	undefined	0							undefined	0	58de3c6aeb71121000d3701e		false	377879	724	112	0	0	0	0	1	undefined	58de3af0eb71121000d36d61
	false	undefined	0							undefined	0	58de3c6aeb71121000d3701f		false	378442	725	113	0	0	0	0	1	undefined	58de3af0eb71121000d36d61
	false	undefined	0							undefined	0	58de3c6beb71121000d37020		false	378911	726	115	0	0	0	0	1	undefined	58de3af0eb71121000d36d61
	false	undefined	0							undefined	0	58de3c6beb71121000d37021		false	379444	727	118	0	0	0	0	1	undefined	58de3af0eb71121000d36d61
	false	undefined	0							undefined	0	58de3c6ceb71121000d37022		false	379983	728	118	0	0	0	0	1	undefined	58de3af0eb71121000d36d61
	false	undefined	0							undefined	0	58de3c6ceb71121000d37023		false	380535	729	118	0	0	0	0	1	undefined	58de3af0eb71121000d36d61
	false	undefined	0							undefined	0	58de3c6deb71121000d37024		false	381059	730	118	0	0	0	0	1	undefined	58de3af0eb71121000d36d61
	false	undefined	0							undefined	0	58de3c6deb71121000d37025		false	381591	731	120	0	0	0	0	1	undefined	58de3af0eb71121000d36d61
	false	undefined	0							undefined	0	58de3c6eeb71121000d37026		false	382123	732	127	0	0	0	0	1	undefined	58de3af0eb71121000d36d61
	false	undefined	0							undefined	0	58de3c6eeb71121000d37027		false	382662	733	134	0	0	0	0	1	undefined	58de3af0eb71121000d36d61
	false	undefined	0							undefined	0	58de3c6feb71121000d37028		false	383124	734	136	0	0	0	0	1	undefined	58de3af0eb71121000d36d61
	false	undefined	0							undefined	0	58de3c6feb71121000d37029		false	383725	735	139	0	0	0	0	1	undefined	58de3af0eb71121000d36d61
	false	undefined	0							undefined	0	58de3c70eb71121000d3702a		false	384262	736	136	0	0	0	0	1	undefined	58de3af0eb71121000d36d61
	false	undefined	0							undefined	0	58de3c71eb71121000d3702b		false	384790	737	134	0	0	0	0	1	undefined	58de3af0eb71121000d36d61
	false	undefined	0							undefined	0	58de3c71eb71121000d3702c		false	385324	738	131	0	0	0	0	1	undefined	58de3af0eb71121000d36d61
	false	undefined	0							undefined	0	58de3c72eb71121000d3702d		false	385863	739	127	0	0	0	0	1	undefined	58de3af0eb71121000d36d61
	false	undefined	0							undefined	0	58de3c72eb71121000d3702e		false	386360	740	126	0	0	0	0	1	undefined	58de3af0eb71121000d36d61
	false	undefined	0							undefined	0	58de3c73eb71121000d3702f		false	386923	741	123	0	0	0	0	1	undefined	58de3af0eb71121000d36d61
	false	undefined	0							undefined	0	58de3c73eb71121000d37030		false	387466	742	122	0	0	0	0	1	undefined	58de3af0eb71121000d36d61
	false	undefined	0							undefined	0	58de3c74eb71121000d37031		false	387993	743	121	0	0	0	0	1	undefined	58de3af0eb71121000d36d61
	false	undefined	0							undefined	0	58de3c74eb71121000d37032		false	388548	744	120	0	0	0	0	1	undefined	58de3af0eb71121000d36d61
	false	undefined	0							undefined	0	58de3c75eb71121000d37033		false	389074	745	120	0	0	0	0	1	undefined	58de3af0eb71121000d36d61
	false	undefined	0							undefined	0	58de3c75eb71121000d37034		false	389614	746	119	0	0	0	0	1	undefined	58de3af0eb71121000d36d61
	false	undefined	0							undefined	0	58de3c76eb71121000d37035		false	390146	747	117	0	0	0	0	1	undefined	58de3af0eb71121000d36d61
	false	undefined	0							undefined	0	58de3c76eb71121000d37036		false	390674	748	118	0	0	0	0	1	undefined	58de3af0eb71121000d36d61
	false	undefined	0							undefined	0	58de3c77eb71121000d37037		false	391215	749	121	0	0	0	0	1	undefined	58de3af0eb71121000d36d61
	false	undefined	0							undefined	0	58de3c77eb71121000d37038		false	391726	750	123	0	0	0	0	1	undefined	58de3af0eb71121000d36d61
	false	undefined	0							undefined	0	58de3c78eb71121000d37039		false	392213	751	120	0	0	0	0	1	undefined	58de3af0eb71121000d36d61
	false	undefined	0							undefined	0	58de3c78eb71121000d3703a		false	392739	752	119	0	0	0	0	1	undefined	58de3af0eb71121000d36d61
	false	undefined	0							undefined	0	58de3c79eb71121000d3703b		false	393362	753	119	0	0	0	0	1	undefined	58de3af0eb71121000d36d61
	false	undefined	0							undefined	0	58de3c7aeb71121000d3703c		false	393838	754	120	0	0	0	0	1	undefined	58de3af0eb71121000d36d61
	false	undefined	0							undefined	0	58de3c7aeb71121000d3703d		false	394405	755	121	0	0	0	0	1	undefined	58de3af0eb71121000d36d61
	false	undefined	0							undefined	0	58de3c7beb71121000d3703e		false	394951	756	119	0	0	0	0	1	undefined	58de3af0eb71121000d36d61
	false	undefined	0							undefined	0	58de3c7beb71121000d3703f		false	395477	757	118	0	0	0	0	1	undefined	58de3af0eb71121000d36d61
	false	undefined	0							undefined	0	58de3c7ceb71121000d37040		false	396021	758	114	0	0	0	0	1	undefined	58de3af0eb71121000d36d61
	false	undefined	0							undefined	0	58de3c7ceb71121000d37041		false	396560	759	113	0	0	0	0	1	undefined	58de3af0eb71121000d36d61
	false	undefined	0							undefined	0	58de3c7deb71121000d37042		false	397088	760	112	0	0	0	0	1	undefined	58de3af0eb71121000d36d61
	false	undefined	0							undefined	0	58de3c7deb71121000d37043		false	397620	761	114	0	0	0	0	1	undefined	58de3af0eb71121000d36d61
	false	undefined	0							undefined	0	58de3c7eeb71121000d37044		false	398154	762	120	0	0	0	0	1	undefined	58de3af0eb71121000d36d61
	false	undefined	0							undefined	0	58de3c7eeb71121000d37045		false	398690	763	123	0	0	0	0	1	undefined	58de3af0eb71121000d36d61
	false	undefined	0							undefined	0	58de3c7feb71121000d37046		false	399154	764	121	0	0	0	0	1	undefined	58de3af0eb71121000d36d61
	false	undefined	0							undefined	0	58de3c7feb71121000d37047		false	399763	765	122	0	0	0	0	1	undefined	58de3af0eb71121000d36d61
	false	undefined	0							undefined	0	58de3c80eb71121000d37048		false	400222	766	117	0	0	0	0	1	undefined	58de3af0eb71121000d36d61
	false	undefined	0							undefined	0	58de3c81eb71121000d37049		false	400841	767	117	0	0	0	0	1	undefined	58de3af0eb71121000d36d61
	false	undefined	0							undefined	0	58de3c81eb71121000d3704a		false	401314	768	118	0	0	0	0	1	undefined	58de3af0eb71121000d36d61
	false	undefined	0							undefined	0	58de3c82eb71121000d3704b		false	401901	769	118	0	0	0	0	1	undefined	58de3af0eb71121000d36d61
	false	undefined	0							undefined	0	58de3c82eb71121000d3704c		false	402355	770	119	0	0	0	0	1	undefined	58de3af0eb71121000d36d61
	false	undefined	0							undefined	0	58de3c83eb71121000d3704d		false	402979	771	118	0	0	0	0	1	undefined	58de3af0eb71121000d36d61
	false	undefined	0							undefined	0	58de3c83eb71121000d3704e		false	403503	772	120	0	0	0	0	1	undefined	58de3af0eb71121000d36d61
	false	undefined	0							undefined	0	58de3c84eb71121000d3704f		false	404036	773	118	0	0	0	0	1	undefined	58de3af0eb71121000d36d61
	false	undefined	0							undefined	0	58de3c84eb71121000d37050		false	404517	774	120	0	0	0	0	1	undefined	58de3af0eb71121000d36d61
	false	undefined	0							undefined	0	58de3c85eb71121000d37051		false	405041	775	120	0	0	0	0	1	undefined	58de3af0eb71121000d36d61
	false	undefined	0							undefined	0	58de3c85eb71121000d37052		false	405530	776	124	0	0	0	0	1	undefined	58de3af0eb71121000d36d61
	false	undefined	0							undefined	0	58de3c86eb71121000d37053		false	406102	777	122	0	0	0	0	1	undefined	58de3af0eb71121000d36d61
	false	undefined	0							undefined	0	58de3c86eb71121000d37054		false	406593	778	120	0	0	0	0	1	undefined	58de3af0eb71121000d36d61
	false	undefined	0							undefined	0	58de3c87eb71121000d37055		false	407106	779	115	0	0	0	0	1	undefined	58de3af0eb71121000d36d61
	false	undefined	0							undefined	0	58de3c87eb71121000d37056		false	407706	780	118	0	0	0	0	1	undefined	58de3af0eb71121000d36d61
	false	undefined	0							undefined	0	58de3c88eb71121000d37057		false	408169	781	117	0	0	0	0	1	undefined	58de3af0eb71121000d36d61
	false	undefined	0							undefined	0	58de3c88eb71121000d37058		false	408714	782	116	0	0	0	0	1	undefined	58de3af0eb71121000d36d61
	false	undefined	0							undefined	0	58de3c89eb71121000d37059		false	409252	783	117	0	0	0	0	1	undefined	58de3af0eb71121000d36d61
	false	undefined	0							undefined	0	58de3c8aeb71121000d3705a		false	409801	784	118	0	0	0	0	1	undefined	58de3af0eb71121000d36d61
	false	undefined	0							undefined	0	58de3c8aeb71121000d3705b		false	410331	785	121	0	0	0	0	1	undefined	58de3af0eb71121000d36d61
	false	undefined	0							undefined	0	58de3c8beb71121000d3705c		false	410852	786	118	0	0	0	0	1	undefined	58de3af0eb71121000d36d61
	false	undefined	0							undefined	0	58de3c8beb71121000d3705d		false	411401	787	120	0	0	0	0	1	undefined	58de3af0eb71121000d36d61
	false	undefined	0							undefined	0	58de3c8ceb71121000d3705e		false	411928	788	120	0	0	0	0	1	undefined	58de3af0eb71121000d36d61
	false	undefined	0							undefined	0	58de3c8ceb71121000d3705f		false	412470	789	121	0	0	0	0	1	undefined	58de3af0eb71121000d36d61
	false	undefined	0							undefined	0	58de3c8deb71121000d37060		false	413000	790	120	0	0	0	0	1	undefined	58de3af0eb71121000d36d61
	false	undefined	0							undefined	0	58de3c8deb71121000d37061		false	413529	791	118	0	0	0	0	1	undefined	58de3af0eb71121000d36d61
	false	undefined	0							undefined	0	58de3c8eeb71121000d37062		false	414065	792	118	0	0	0	0	1	undefined	58de3af0eb71121000d36d61
	false	undefined	0							undefined	0	58de3c8eeb71121000d37063		false	414597	793	118	0	0	0	0	1	undefined	58de3af0eb71121000d36d61
	false	undefined	0							undefined	0	58de3c8feb71121000d37064		false	415130	794	117	0	0	0	0	1	undefined	58de3af0eb71121000d36d61
	false	undefined	0							undefined	0	58de3c8feb71121000d37065		false	415664	795	116	0	0	0	0	1	undefined	58de3af0eb71121000d36d61
	false	undefined	0							undefined	0	58de3c90eb71121000d37066		false	416199	796	115	0	0	0	0	1	undefined	58de3af0eb71121000d36d61
	false	undefined	0							undefined	0	58de3c90eb71121000d37067		false	416746	797	113	0	0	0	0	1	undefined	58de3af0eb71121000d36d61
	false	undefined	0							undefined	0	58de3c91eb71121000d37068		false	417277	798	113	0	0	0	0	1	undefined	58de3af0eb71121000d36d61
	false	undefined	0							undefined	0	58de3c92eb71121000d37069		false	417816	799	116	0	0	0	0	1	undefined	58de3af0eb71121000d36d61
	false	undefined	0							undefined	0	58de3c92eb71121000d3706a		false	418331	800	120	0	0	0	0	1	undefined	58de3af0eb71121000d36d61
	false	undefined	0							undefined	0	58de3c93eb71121000d3706b		false	418866	801	120	0	0	0	0	1	undefined	58de3af0eb71121000d36d61
	false	undefined	0							undefined	0	58de3c93eb71121000d3706c		false	419419	802	118	0	0	0	0	1	undefined	58de3af0eb71121000d36d61
	false	undefined	0							undefined	0	58de3c94eb71121000d3706d		false	419946	803	118	0	0	0	0	1	undefined	58de3af0eb71121000d36d61
	false	undefined	0							undefined	0	58de3c94eb71121000d3706e		false	420481	804	117	0	0	0	0	1	undefined	58de3af0eb71121000d36d61
	false	undefined	0							undefined	0	58de3c95eb71121000d3706f		false	421025	805	116	0	0	0	0	1	undefined	58de3af0eb71121000d36d61
	false	undefined	0							undefined	0	58de3c95eb71121000d37070		false	421548	806	118	0	0	0	0	1	undefined	58de3af0eb71121000d36d61
	false	undefined	0							undefined	0	58de3c96eb71121000d37071		false	422080	807	120	0	0	0	0	1	undefined	58de3af0eb71121000d36d61
	false	undefined	0							undefined	0	58de3c96eb71121000d37072		false	422619	808	121	0	0	0	0	1	undefined	58de3af0eb71121000d36d61
	false	undefined	0							undefined	0	58de3c97eb71121000d37073		false	423154	809	122	0	0	0	0	1	undefined	58de3af0eb71121000d36d61
	false	undefined	0							undefined	0	58de3c97eb71121000d37074		false	423680	810	121	0	0	0	0	1	undefined	58de3af0eb71121000d36d61
	false	undefined	0							undefined	0	58de3c98eb71121000d37075		false	424230	811	120	0	0	0	0	1	undefined	58de3af0eb71121000d36d61
	false	undefined	0							undefined	0	58de3c98eb71121000d37076		false	424751	812	119	0	0	0	0	1	undefined	58de3af0eb71121000d36d61
	false	undefined	0							undefined	0	58de3c99eb71121000d37077		false	425296	813	120	0	0	0	0	1	undefined	58de3af0eb71121000d36d61
	false	undefined	0							undefined	0	58de3c9aeb71121000d37078		false	425815	814	118	0	0	0	0	1	undefined	58de3af0eb71121000d36d61
	false	undefined	0							undefined	0	58de3c9aeb71121000d37079		false	426362	815	117	0	0	0	0	1	undefined	58de3af0eb71121000d36d61
	false	undefined	0							undefined	0	58de3c9beb71121000d3707a		false	426891	816	118	0	0	0	0	1	undefined	58de3af0eb71121000d36d61
	false	undefined	0							undefined	0	58de3c9beb71121000d3707b		false	427427	817	116	0	0	0	0	1	undefined	58de3af0eb71121000d36d61
	false	undefined	0							undefined	0	58de3c9ceb71121000d3707c		true	427962	818	106	0	0	0	0	1	undefined	58de3af0eb71121000d36d61
	false	undefined	0							undefined	0	58de3c9ceb71121000d3707d		true	428494	819	89	0	0	0	0	1	undefined	58de3af0eb71121000d36d61
	false	undefined	0							undefined	0	58de3c9deb71121000d3707e		true	429030	820	-1	0	0	0	0	1	undefined	58de3af0eb71121000d36d61
	false	undefined	0							undefined	0	58de3c9deb71121000d3707f		true	429628	821	-1	0	0	0	0	1	undefined	58de3af0eb71121000d36d61
	false	undefined	0							undefined	0	58de3c9eeb71121000d37080		false	430094	822	-1	0	0	0	0	1	undefined	58de3af0eb71121000d36d61
	false	undefined	0							undefined	0	58de3c9feb71121000d37081		false	430630	823	72	0	0	0	0	1	undefined	58de3af0eb71121000d36d61
	false	undefined	0							undefined	0	58de3c9feb71121000d37082		false	431166	824	-1	0	0	0	0	1	undefined	58de3af0eb71121000d36d61
	false	undefined	0							undefined	0	58de3c9feb71121000d37083		false	431702	825	-1	0	0	0	0	1	undefined	58de3af0eb71121000d36d61
	false	undefined	0							undefined	0	58de3ca0eb71121000d37084		false	432244	826	-1	0	0	0	0	1	undefined	58de3af0eb71121000d36d61
	false	undefined	0							undefined	0	58de3ca0eb71121000d37085		true	432760	827	-1	0	0	0	0	1	undefined	58de3af0eb71121000d36d61
	false	undefined	0							undefined	0	58de3ca1eb71121000d37086		false	433302	828	78	0	0	0	0	1	undefined	58de3af0eb71121000d36d61
	false	undefined	0							undefined	0	58de3ca2eb71121000d37087		false	433845	829	-1	0	0	0	0	1	undefined	58de3af0eb71121000d36d61
	false	undefined	0							undefined	0	58de3ca2eb71121000d37088		false	434374	830	-1	0	0	0	0	1	undefined	58de3af0eb71121000d36d61
	false	undefined	0							undefined	0	58de3ca3eb71121000d37089		false	434910	831	-1	0	0	0	0	1	undefined	58de3af0eb71121000d36d61
	false	undefined	0							undefined	0	58de3ca3eb71121000d3708a		false	435446	832	-1	0	0	0	0	1	undefined	58de3af0eb71121000d36d61
	false	undefined	0							undefined	0	58de3ca4eb71121000d3708b		false	435976	833	-1	0	0	0	0	1	undefined	58de3af0eb71121000d36d61
	false	undefined	0							undefined	0	58de3ca4eb71121000d3708c		false	436510	834	-1	0	0	0	0	1	undefined	58de3af0eb71121000d36d61
	false	undefined	0							undefined	0	58de3ca5eb71121000d3708d		true	437042	835	67	0	0	0	0	1	undefined	58de3af0eb71121000d36d61
	false	undefined	0							undefined	0	58de3ca5eb71121000d3708e		true	437576	836	70	0	0	0	0	1	undefined	58de3af0eb71121000d36d61
	false	undefined	0							undefined	0	58de3ca6eb71121000d3708f		true	438109	837	82	0	0	0	0	1	undefined	58de3af0eb71121000d36d61
	false	undefined	0							undefined	0	58de3ca6eb71121000d37090		true	438576	841	74	0	0	0	0	1	undefined	58de3af0eb71121000d36d61
	false	undefined	0							undefined	0	58de3ca7eb71121000d37091		true	439126	842	-1	0	0	0	0	1	undefined	58de3af0eb71121000d36d61
	false	undefined	0							undefined	0	58de3ca7eb71121000d37092		true	439642	843	-1	0	0	0	0	1	undefined	58de3af0eb71121000d36d61
	false	undefined	0							undefined	0	58de3ca8eb71121000d37093		true	440192	844	-1	0	0	0	0	1	undefined	58de3af0eb71121000d36d61
	false	undefined	0							undefined	0	58de3ca8eb71121000d37094		true	440726	845	-1	0	0	0	0	1	undefined	58de3af0eb71121000d36d61
	false	undefined	0							undefined	0	58de3ca9eb71121000d37095		false	441253	846	-1	0	0	0	0	1	undefined	58de3af0eb71121000d36d61
	false	undefined	0							undefined	0	58de3caaeb71121000d37096		false	441792	847	-1	0	0	0	0	1	undefined	58de3af0eb71121000d36d61
	false	undefined	0							undefined	0	58de3caaeb71121000d37097		false	442328	848	-1	0	0	0	0	1	undefined	58de3af0eb71121000d36d61
	false	undefined	0							undefined	0	58de3cabeb71121000d37098		false	442858	849	-1	0	0	0	0	1	undefined	58de3af0eb71121000d36d61
	false	undefined	0							undefined	0	58de3cabeb71121000d37099		false	443392	850	-1	0	0	0	0	1	undefined	58de3af0eb71121000d36d61
	false	undefined	0							undefined	0	58de3caceb71121000d3709a		false	443925	851	-1	0	0	0	0	1	undefined	58de3af0eb71121000d36d61
	false	undefined	0							undefined	0	58de3caceb71121000d3709b		false	444457	852	-1	0	0	0	0	1	undefined	58de3af0eb71121000d36d61
	false	undefined	0							undefined	0	58de3cadeb71121000d3709c		false	444992	853	-1	0	0	0	0	1	undefined	58de3af0eb71121000d36d61
	false	undefined	0							undefined	0	58de3cadeb71121000d3709d		false	445524	854	-1	0	0	0	0	1	undefined	58de3af0eb71121000d36d61
	false	undefined	0							undefined	0	58de3caeeb71121000d3709e		false	446083	855	-1	0	0	0	0	1	undefined	58de3af0eb71121000d36d61
	false	undefined	0							undefined	0	58de3caeeb71121000d3709f		false	446593	856	-1	0	0	0	0	1	undefined	58de3af0eb71121000d36d61
	false	undefined	0							undefined	0	58de3cafeb71121000d370a0		false	447127	857	-1	0	0	0	0	1	undefined	58de3af0eb71121000d36d61
	false	undefined	0							undefined	0	58de3cafeb71121000d370a1		false	447662	858	-1	0	0	0	0	1	undefined	58de3af0eb71121000d36d61
	false	undefined	0							undefined	0	58de3cb0eb71121000d370a2		false	448209	859	-1	0	0	0	0	1	undefined	58de3af0eb71121000d36d61
	false	undefined	0							undefined	0	58de3cb0eb71121000d370a3		false	448740	860	-1	0	0	0	0	1	undefined	58de3af0eb71121000d36d61
	false	undefined	0							undefined	0	58de3cb1eb71121000d370a4		false	449268	861	-1	0	0	0	0	1	undefined	58de3af0eb71121000d36d61
	false	undefined	0							undefined	0	58de3cb2eb71121000d370a5		false	449813	862	-1	0	0	0	0	1	undefined	58de3af0eb71121000d36d61
	false	undefined	0							undefined	0	58de3cb2eb71121000d370a6		false	450340	863	-1	0	0	0	0	1	undefined	58de3af0eb71121000d36d61
	false	undefined	0							undefined	0	58de3cb3eb71121000d370a7		false	450881	864	-1	0	0	0	0	1	undefined	58de3af0eb71121000d36d61
	false	undefined	0							undefined	0	58de3cb3eb71121000d370a8		false	451415	865	-1	0	0	0	0	1	undefined	58de3af0eb71121000d36d61
	false	undefined	0							undefined	0	58de3cb4eb71121000d370a9		false	451950	866	-1	0	0	0	0	1	undefined	58de3af0eb71121000d36d61
	false	undefined	0							undefined	0	58de3cb4eb71121000d370aa		false	452484	867	-1	0	0	0	0	1	undefined	58de3af0eb71121000d36d61
	false	undefined	0							undefined	0	58de3cb5eb71121000d370ab		false	453016	868	-1	0	0	0	0	1	undefined	58de3af0eb71121000d36d61
	false	undefined	0							undefined	0	58de3cb5eb71121000d370ac		false	453543	869	-1	0	0	0	0	1	undefined	58de3af0eb71121000d36d61
	false	undefined	0							undefined	0	58de3cb6eb71121000d370ad		true	454084	870	114	0	0	0	0	1	undefined	58de3af0eb71121000d36d61
	false	undefined	0							undefined	0	58de3cb6eb71121000d370ae		true	454616	871	105	0	0	0	0	1	undefined	58de3af0eb71121000d36d61
	false	undefined	0							undefined	0	58de3cb7eb71121000d370af		true	455152	872	97	0	0	0	0	1	undefined	58de3af0eb71121000d36d61
	false	undefined	0							undefined	0	58de3cb7eb71121000d370b0		false	455688	876	121	0	0	0	0	1	undefined	58de3af0eb71121000d36d61
	false	undefined	0							undefined	0	58de3cb8eb71121000d370b1		false	456221	877	123	0	0	0	0	1	undefined	58de3af0eb71121000d36d61
	false	undefined	0							undefined	0	58de3cb8eb71121000d370b2		false	456759	878	125	0	0	0	0	1	undefined	58de3af0eb71121000d36d61
	false	undefined	0							undefined	0	58de3cb9eb71121000d370b3		false	457286	879	123	0	0	0	0	1	undefined	58de3af0eb71121000d36d61
	false	undefined	0							undefined	0	58de3cbaeb71121000d370b4		false	457820	880	122	0	0	0	0	1	undefined	58de3af0eb71121000d36d61
	false	undefined	0							undefined	0	58de3cbaeb71121000d370b5		false	458359	881	122	0	0	0	0	1	undefined	58de3af0eb71121000d36d61
	false	undefined	0							undefined	0	58de3cbbeb71121000d370b6		false	458891	882	124	0	0	0	0	1	undefined	58de3af0eb71121000d36d61
	false	undefined	0							undefined	0	58de3cbbeb71121000d370b7		false	459420	883	125	0	0	0	0	1	undefined	58de3af0eb71121000d36d61
	false	undefined	0							undefined	0	58de3cbceb71121000d370b8		false	459961	884	124	0	0	0	0	1	undefined	58de3af0eb71121000d36d61
	false	undefined	0							undefined	0	58de3cbceb71121000d370b9		false	460486	885	123	0	0	0	0	1	undefined	58de3af0eb71121000d36d61
	false	undefined	0							undefined	0	58de3cbdeb71121000d370ba		false	461020	886	122	0	0	0	0	1	undefined	58de3af0eb71121000d36d61
	false	undefined	0							undefined	0	58de3cbdeb71121000d370bb		false	461555	887	120	0	0	0	0	1	undefined	58de3af0eb71121000d36d61
	false	undefined	0							undefined	0	58de3cbeeb71121000d370bc		false	462103	888	120	0	0	0	0	1	undefined	58de3af0eb71121000d36d61
	false	undefined	0							undefined	0	58de3cbeeb71121000d370bd		false	462634	889	119	0	0	0	0	1	undefined	58de3af0eb71121000d36d61
	false	undefined	0							undefined	0	58de3cbfeb71121000d370be		false	463170	890	120	0	0	0	0	1	undefined	58de3af0eb71121000d36d61
	false	undefined	0							undefined	0	58de3cbfeb71121000d370bf		false	463703	891	121	0	0	0	0	1	undefined	58de3af0eb71121000d36d61
	false	undefined	0							undefined	0	58de3cc0eb71121000d370c0		false	464234	892	120	0	0	0	0	1	undefined	58de3af0eb71121000d36d61
	false	undefined	0							undefined	0	58de3cc0eb71121000d370c1		false	464758	893	116	0	0	0	0	1	undefined	58de3af0eb71121000d36d61
	false	undefined	0							undefined	0	58de3cc1eb71121000d370c2		false	465301	894	114	0	0	0	0	1	undefined	58de3af0eb71121000d36d61
	false	undefined	0							undefined	0	58de3cc2eb71121000d370c3		false	465832	895	117	0	0	0	0	1	undefined	58de3af0eb71121000d36d61
	false	undefined	0							undefined	0	58de3cc2eb71121000d370c4		false	466367	896	120	0	0	0	0	1	undefined	58de3af0eb71121000d36d61
	false	undefined	0							undefined	0	58de3cc3eb71121000d370c5		false	466898	897	121	0	0	0	0	1	undefined	58de3af0eb71121000d36d61
	false	undefined	0							undefined	0	58de3cc3eb71121000d370c6		false	467437	898	121	0	0	0	0	1	undefined	58de3af0eb71121000d36d61
	false	undefined	0							undefined	0	58de3cc4eb71121000d370c7		false	467987	899	120	0	0	0	0	1	undefined	58de3af0eb71121000d36d61
	false	undefined	0							undefined	0	58de3cc4eb71121000d370c8		false	468501	900	120	0	0	0	0	1	undefined	58de3af0eb71121000d36d61
	false	undefined	0							undefined	0	58de3cc5eb71121000d370c9		false	469037	901	120	0	0	0	0	1	undefined	58de3af0eb71121000d36d61
	false	undefined	0							undefined	0	58de3cc5eb71121000d370ca		false	469580	902	121	0	0	0	0	1	undefined	58de3af0eb71121000d36d61
	false	undefined	0							undefined	0	58de3cc6eb71121000d370cb		false	470131	903	120	0	0	0	0	1	undefined	58de3af0eb71121000d36d61
	false	undefined	0							undefined	0	58de3cc6eb71121000d370cc		false	470647	904	119	0	0	0	0	1	undefined	58de3af0eb71121000d36d61
	false	undefined	0							undefined	0	58de3cc7eb71121000d370cd		false	471186	905	119	0	0	0	0	1	undefined	58de3af0eb71121000d36d61
	false	undefined	0							undefined	0	58de3cc7eb71121000d370ce		false	471720	906	119	0	0	0	0	1	undefined	58de3af0eb71121000d36d61
	false	undefined	0							undefined	0	58de3cc8eb71121000d370cf		false	472258	907	120	0	0	0	0	1	undefined	58de3af0eb71121000d36d61
	false	undefined	0							undefined	0	58de3cc8eb71121000d370d0		false	472790	908	119	0	0	0	0	1	undefined	58de3af0eb71121000d36d61
	false	undefined	0							undefined	0	58de3cc9eb71121000d370d1		false	473333	909	119	0	0	0	0	1	undefined	58de3af0eb71121000d36d61
	false	undefined	0							undefined	0	58de3ccaeb71121000d370d2		false	473854	910	120	0	0	0	0	1	undefined	58de3af0eb71121000d36d61
	false	undefined	0							undefined	0	58de3ccaeb71121000d370d3		false	474404	911	118	0	0	0	0	1	undefined	58de3af0eb71121000d36d61
	false	undefined	0							undefined	0	58de3ccbeb71121000d370d4		false	474928	912	120	0	0	0	0	1	undefined	58de3af0eb71121000d36d61
	false	undefined	0							undefined	0	58de3ccbeb71121000d370d5		false	475469	913	118	0	0	0	0	1	undefined	58de3af0eb71121000d36d61
	false	undefined	0							undefined	0	58de3ccceb71121000d370d6		false	476002	914	119	0	0	0	0	1	undefined	58de3af0eb71121000d36d61
	false	undefined	0							undefined	0	58de3ccceb71121000d370d7		false	476541	915	119	0	0	0	0	1	undefined	58de3af0eb71121000d36d61
	false	undefined	0							undefined	0	58de3ccdeb71121000d370d8		false	477069	916	118	0	0	0	0	1	undefined	58de3af0eb71121000d36d61
	false	undefined	0							undefined	0	58de3ccdeb71121000d370d9		false	477603	917	118	0	0	0	0	1	undefined	58de3af0eb71121000d36d61
	false	undefined	0							undefined	0	58de3cceeb71121000d370da		false	478139	918	119	0	0	0	0	1	undefined	58de3af0eb71121000d36d61
	false	undefined	0							undefined	0	58de3cceeb71121000d370db		false	478672	919	120	0	0	0	0	1	undefined	58de3af0eb71121000d36d61
	false	undefined	0							undefined	0	58de3ccfeb71121000d370dc		false	479209	920	119	0	0	0	0	1	undefined	58de3af0eb71121000d36d61
	false	undefined	0							undefined	0	58de3ccfeb71121000d370dd		false	479742	921	119	0	0	0	0	1	undefined	58de3af0eb71121000d36d61
	false	undefined	0							undefined	0	58de3cd0eb71121000d370de		false	480272	922	119	0	0	0	0	1	undefined	58de3af0eb71121000d36d61
	false	undefined	0							undefined	0	58de3cd1eb71121000d370df		false	480809	923	119	0	0	0	0	1	undefined	58de3af0eb71121000d36d61
	false	undefined	0							undefined	0	58de3cd1eb71121000d370e0		false	481338	924	117	0	0	0	0	1	undefined	58de3af0eb71121000d36d61
	false	undefined	0							undefined	0	58de3cd2eb71121000d370e1		false	481872	925	115	0	0	0	0	1	undefined	58de3af0eb71121000d36d61
	false	undefined	0							undefined	0	58de3cd2eb71121000d370e2		false	482412	926	115	0	0	0	0	1	undefined	58de3af0eb71121000d36d61
	false	undefined	0							undefined	0	58de3cd3eb71121000d370e3		false	482943	927	117	0	0	0	0	1	undefined	58de3af0eb71121000d36d61
	false	undefined	0							undefined	0	58de3cd3eb71121000d370e4		false	483475	928	120	0	0	0	0	1	undefined	58de3af0eb71121000d36d61
	false	undefined	0							undefined	0	58de3cd4eb71121000d370e5		false	484021	929	119	0	0	0	0	1	undefined	58de3af0eb71121000d36d61
	false	undefined	0							undefined	0	58de3cd4eb71121000d370e6		false	484544	930	119	0	0	0	0	1	undefined	58de3af0eb71121000d36d61
	false	undefined	0							undefined	0	58de3cd5eb71121000d370e7		false	485080	931	121	0	0	0	0	1	undefined	58de3af0eb71121000d36d61
	false	undefined	0							undefined	0	58de3cd5eb71121000d370e8		false	485614	932	121	0	0	0	0	1	undefined	58de3af0eb71121000d36d61
	false	undefined	0							undefined	0	58de3cd6eb71121000d370e9		false	486146	933	119	0	0	0	0	1	undefined	58de3af0eb71121000d36d61
	false	undefined	0							undefined	0	58de3cd6eb71121000d370ea		false	486684	934	117	0	0	0	0	1	undefined	58de3af0eb71121000d36d61
	false	undefined	0							undefined	0	58de3cd7eb71121000d370eb		false	487219	935	116	0	0	0	0	1	undefined	58de3af0eb71121000d36d61
	false	undefined	0							undefined	0	58de3cd7eb71121000d370ec		false	487765	936	117	0	0	0	0	1	undefined	58de3af0eb71121000d36d61
	false	undefined	0							undefined	0	58de3cd8eb71121000d370ed		false	488289	937	116	0	0	0	0	1	undefined	58de3af0eb71121000d36d61
	false	undefined	0							undefined	0	58de3cd9eb71121000d370ee		false	488824	938	117	0	0	0	0	1	undefined	58de3af0eb71121000d36d61
	false	undefined	0							undefined	0	58de3cd9eb71121000d370ef		false	489354	939	117	0	0	0	0	1	undefined	58de3af0eb71121000d36d61
	false	undefined	0							undefined	0	58de3cdaeb71121000d370f0		false	489898	940	121	0	0	0	0	1	undefined	58de3af0eb71121000d36d61
	false	undefined	0							undefined	0	58de3cdaeb71121000d370f1		false	490426	941	122	0	0	0	0	1	undefined	58de3af0eb71121000d36d61
	false	undefined	0							undefined	0	58de3cdbeb71121000d370f2		false	490966	942	120	0	0	0	0	1	undefined	58de3af0eb71121000d36d61
	false	undefined	0							undefined	0	58de3cdbeb71121000d370f3		false	491500	943	120	0	0	0	0	1	undefined	58de3af0eb71121000d36d61
	false	undefined	0							undefined	0	58de3cdceb71121000d370f4		false	492037	944	121	0	0	0	0	1	undefined	58de3af0eb71121000d36d61
	false	undefined	0							undefined	0	58de3cdceb71121000d370f5		false	492557	945	122	0	0	0	0	1	undefined	58de3af0eb71121000d36d61
	false	undefined	0							undefined	0	58de3cddeb71121000d370f6		false	493101	946	120	0	0	0	0	1	undefined	58de3af0eb71121000d36d61
	false	undefined	0							undefined	0	58de3cddeb71121000d370f7		false	493627	947	119	0	0	0	0	1	undefined	58de3af0eb71121000d36d61
	false	undefined	0							undefined	0	58de3cdeeb71121000d370f8		false	494169	948	121	0	0	0	0	1	undefined	58de3af0eb71121000d36d61
	false	undefined	0							undefined	0	58de3cdeeb71121000d370f9		false	494708	949	121	0	0	0	0	1	undefined	58de3af0eb71121000d36d61
	false	undefined	0							undefined	0	58de3cdfeb71121000d370fa		false	495228	950	119	0	0	0	0	1	undefined	58de3af0eb71121000d36d61
	false	undefined	0							undefined	0	58de3cdfeb71121000d370fb		false	495768	951	119	0	0	0	0	1	undefined	58de3af0eb71121000d36d61
	false	undefined	0							undefined	0	58de3ce0eb71121000d370fc		false	496301	952	120	0	0	0	0	1	undefined	58de3af0eb71121000d36d61
	false	undefined	0							undefined	0	58de3ce1eb71121000d370fd		false	496837	953	120	0	0	0	0	1	undefined	58de3af0eb71121000d36d61
	false	undefined	0							undefined	0	58de3ce1eb71121000d370fe		false	497374	954	118	0	0	0	0	1	undefined	58de3af0eb71121000d36d61
	false	undefined	0							undefined	0	58de3ce2eb71121000d370ff		false	497917	955	119	0	0	0	0	1	undefined	58de3af0eb71121000d36d61
	false	undefined	0							undefined	0	58de3ce2eb71121000d37100		false	498454	956	122	0	0	0	0	1	undefined	58de3af0eb71121000d36d61
	false	undefined	0							undefined	0	58de3ce3eb71121000d37101		false	498989	957	125	0	0	0	0	1	undefined	58de3af0eb71121000d36d61
	false	undefined	0							undefined	0	58de3ce3eb71121000d37102		false	499521	958	121	0	0	0	0	1	undefined	58de3af0eb71121000d36d61
	false	undefined	0							undefined	0	58de3ce4eb71121000d37103		false	500058	959	118	0	0	0	0	1	undefined	58de3af0eb71121000d36d61
	false	undefined	0							undefined	0	58de3ce4eb71121000d37104		false	500587	960	120	0	0	0	0	1	undefined	58de3af0eb71121000d36d61
	false	undefined	0							undefined	0	58de3ce5eb71121000d37105		false	501119	961	122	0	0	0	0	1	undefined	58de3af0eb71121000d36d61
	false	undefined	0							undefined	0	58de3ce5eb71121000d37106		false	501651	962	121	0	0	0	0	1	undefined	58de3af0eb71121000d36d61
	false	undefined	0							undefined	0	58de3ce6eb71121000d37107		false	502180	963	121	0	0	0	0	1	undefined	58de3af0eb71121000d36d61
	false	undefined	0							undefined	0	58de3ce6eb71121000d37108		false	502718	964	121	0	0	0	0	1	undefined	58de3af0eb71121000d36d61
	false	undefined	0							undefined	0	58de3ce7eb71121000d37109		false	503251	965	122	0	0	0	0	1	undefined	58de3af0eb71121000d36d61
	false	undefined	0							undefined	0	58de3ce8eb71121000d3710a		false	503785	966	123	0	0	0	0	1	undefined	58de3af0eb71121000d36d61
	false	undefined	0							undefined	0	58de3ce8eb71121000d3710b		false	504321	967	122	0	0	0	0	1	undefined	58de3af0eb71121000d36d61
	false	undefined	0							undefined	0	58de3ce9eb71121000d3710c		false	504852	968	122	0	0	0	0	1	undefined	58de3af0eb71121000d36d61
	false	undefined	0							undefined	0	58de3ce9eb71121000d3710d		false	505401	969	121	0	0	0	0	1	undefined	58de3af0eb71121000d36d61
	false	undefined	0							undefined	0	58de3ceaeb71121000d3710e		false	505922	970	117	0	0	0	0	1	undefined	58de3af0eb71121000d36d61
	false	undefined	0							undefined	0	58de3ceaeb71121000d3710f		false	506457	971	109	0	0	0	0	1	undefined	58de3af0eb71121000d36d61
	false	undefined	0							undefined	0	58de3cebeb71121000d37110		false	507004	972	108	0	0	0	0	1	undefined	58de3af0eb71121000d36d61
	false	undefined	0							undefined	0	58de3cebeb71121000d37111		false	507529	973	110	0	0	0	0	1	undefined	58de3af0eb71121000d36d61
	false	undefined	0							undefined	0	58de3ceceb71121000d37112		false	508080	974	114	0	0	0	0	1	undefined	58de3af0eb71121000d36d61
	false	undefined	0							undefined	0	58de3ceceb71121000d37113		false	508591	975	114	0	0	0	0	1	undefined	58de3af0eb71121000d36d61
	false	undefined	0							undefined	0	58de3cedeb71121000d37114		false	509123	976	115	0	0	0	0	1	undefined	58de3af0eb71121000d36d61
	false	undefined	0							undefined	0	58de3cedeb71121000d37115		false	509668	977	116	0	0	0	0	1	undefined	58de3af0eb71121000d36d61
	false	undefined	0							undefined	0	58de3ceeeb71121000d37116		false	510202	978	114	0	0	0	0	1	undefined	58de3af0eb71121000d36d61
	false	undefined	0							undefined	0	58de3ceeeb71121000d37117		false	510735	979	113	0	0	0	0	1	undefined	58de3af0eb71121000d36d61
	false	undefined	0							undefined	0	58de3cefeb71121000d37118		false	511275	980	114	0	0	0	0	1	undefined	58de3af0eb71121000d36d61
	false	undefined	0							undefined	0	58de3cf0eb71121000d37119		false	511803	981	117	0	0	0	0	1	undefined	58de3af0eb71121000d36d61
	false	undefined	0							undefined	0	58de3cf0eb71121000d3711a		false	512334	982	116	0	0	0	0	1	undefined	58de3af0eb71121000d36d61
	false	undefined	0							undefined	0	58de3cf1eb71121000d3711b		false	512870	983	116	0	0	0	0	1	undefined	58de3af0eb71121000d36d61
	false	undefined	0							undefined	0	58de3cf1eb71121000d3711c		false	513407	984	118	0	0	0	0	1	undefined	58de3af0eb71121000d36d61
	false	undefined	0							undefined	0	58de3cf2eb71121000d3711d		false	513933	985	118	0	0	0	0	1	undefined	58de3af0eb71121000d36d61
	false	undefined	0							undefined	0	58de3cf2eb71121000d3711e		false	514471	986	116	0	0	0	0	1	undefined	58de3af0eb71121000d36d61
	false	undefined	0							undefined	0	58de3cf3eb71121000d3711f		false	515002	987	115	0	0	0	0	1	undefined	58de3af0eb71121000d36d61
	false	undefined	0							undefined	0	58de3cf3eb71121000d37120		false	515541	988	116	0	0	0	0	1	undefined	58de3af0eb71121000d36d61
	false	undefined	0							undefined	0	58de3cf4eb71121000d37121		false	516089	989	117	0	0	0	0	1	undefined	58de3af0eb71121000d36d61
	false	undefined	0							undefined	0	58de3cf4eb71121000d37122		false	516608	990	118	0	0	0	0	1	undefined	58de3af0eb71121000d36d61
	false	undefined	0							undefined	0	58de3cf5eb71121000d37123		false	517142	991	118	0	0	0	0	1	undefined	58de3af0eb71121000d36d61
	false	undefined	0							undefined	0	58de3cf5eb71121000d37124		false	517690	992	114	0	0	0	0	1	undefined	58de3af0eb71121000d36d61
	false	undefined	0							undefined	0	58de3cf6eb71121000d37125		false	518212	993	113	0	0	0	0	1	undefined	58de3af0eb71121000d36d61
	false	undefined	0							undefined	0	58de3cf6eb71121000d37126		false	518746	994	114	0	0	0	0	1	undefined	58de3af0eb71121000d36d61
	false	undefined	0							undefined	0	58de3cf7eb71121000d37127		false	519286	995	114	0	0	0	0	1	undefined	58de3af0eb71121000d36d61
	false	undefined	0							undefined	0	58de3cf8eb71121000d37128		false	519819	996	114	0	0	0	0	1	undefined	58de3af0eb71121000d36d61
	false	undefined	0							undefined	0	58de3cf8eb71121000d37129		false	520357	997	115	0	0	0	0	1	undefined	58de3af0eb71121000d36d61
	false	undefined	0							undefined	0	58de3cf9eb71121000d3712a		false	520893	998	116	0	0	0	0	1	undefined	58de3af0eb71121000d36d61
	false	undefined	0							undefined	0	58de3cf9eb71121000d3712b		false	521425	999	115	0	0	0	0	1	undefined	58de3af0eb71121000d36d61
	false	undefined	0							undefined	0	58de3cfaeb71121000d3712c		false	521955	1000	112	0	0	0	0	1	undefined	58de3af0eb71121000d36d61
	false	undefined	0							undefined	0	58de3cfaeb71121000d3712d		false	522488	1001	110	0	0	0	0	1	undefined	58de3af0eb71121000d36d61
	false	undefined	0							undefined	0	58de3cfbeb71121000d3712e		true	523023	1002	113	0	0	0	0	1	undefined	58de3af0eb71121000d36d61
	false	undefined	0							undefined	0	58de3cfbeb71121000d3712f		false	523556	1003	116	0	0	0	0	1	undefined	58de3af0eb71121000d36d61
	false	undefined	0							undefined	0	58de3cfceb71121000d37130		false	524110	1004	116	0	0	0	0	1	undefined	58de3af0eb71121000d36d61
	false	undefined	0							undefined	0	58de3cfceb71121000d37131		false	524629	1005	117	0	0	0	0	1	undefined	58de3af0eb71121000d36d61
	false	undefined	0							undefined	0	58de3cfdeb71121000d37132		false	525167	1006	118	0	0	0	0	1	undefined	58de3af0eb71121000d36d61
	false	undefined	0							undefined	0	58de3cfdeb71121000d37133		false	525695	1007	115	0	0	0	0	1	undefined	58de3af0eb71121000d36d61
	false	undefined	0							undefined	0	58de3cfeeb71121000d37134		false	526224	1008	113	0	0	0	0	1	undefined	58de3af0eb71121000d36d61
	false	undefined	0							undefined	0	58de3cfeeb71121000d37135		false	526765	1009	113	0	0	0	0	1	undefined	58de3af0eb71121000d36d61
	false	undefined	0							undefined	0	58de3cffeb71121000d37136		false	527296	1010	117	0	0	0	0	1	undefined	58de3af0eb71121000d36d61
	false	undefined	0							undefined	0	58de3d00eb71121000d37137		false	527833	1011	119	0	0	0	0	1	undefined	58de3af0eb71121000d36d61
	false	undefined	0							undefined	0	58de3d00eb71121000d37138		false	528365	1012	118	0	0	0	0	1	undefined	58de3af0eb71121000d36d61
	false	undefined	0							undefined	0	58de3d01eb71121000d37139		false	528916	1013	117	0	0	0	0	1	undefined	58de3af0eb71121000d36d61
	false	undefined	0							undefined	0	58de3d01eb71121000d3713a		false	529433	1014	117	0	0	0	0	1	undefined	58de3af0eb71121000d36d61
	false	undefined	0							undefined	0	58de3d02eb71121000d3713b		false	529979	1015	117	0	0	0	0	1	undefined	58de3af0eb71121000d36d61
	false	undefined	0							undefined	0	58de3d02eb71121000d3713c		false	530518	1016	116	0	0	0	0	1	undefined	58de3af0eb71121000d36d61
	false	undefined	0							undefined	0	58de3d03eb71121000d3713d		false	531038	1017	117	0	0	0	0	1	undefined	58de3af0eb71121000d36d61
	false	undefined	0							undefined	0	58de3d03eb71121000d3713e		false	531581	1018	119	0	0	0	0	1	undefined	58de3af0eb71121000d36d61
	false	undefined	0							undefined	0	58de3d04eb71121000d3713f		false	532128	1019	118	0	0	0	0	1	undefined	58de3af0eb71121000d36d61
	false	undefined	0							undefined	0	58de3d04eb71121000d37140		false	532648	1020	118	0	0	0	0	1	undefined	58de3af0eb71121000d36d61
	false	undefined	0							undefined	0	58de3d05eb71121000d37141		false	533184	1021	115	0	0	0	0	1	undefined	58de3af0eb71121000d36d61
	false	undefined	0							undefined	0	58de3d05eb71121000d37142		false	533715	1022	117	0	0	0	0	1	undefined	58de3af0eb71121000d36d61
	false	undefined	0							undefined	0	58de3d06eb71121000d37143		false	534244	1023	118	0	0	0	0	1	undefined	58de3af0eb71121000d36d61
	false	undefined	0							undefined	0	58de3d07eb71121000d37144		false	534786	1024	117	0	0	0	0	1	undefined	58de3af0eb71121000d36d61
	false	undefined	0							undefined	0	58de3d07eb71121000d37145		true	535319	1025	118	0	0	0	0	1	undefined	58de3af0eb71121000d36d61
	false	undefined	0							undefined	0	58de3d08eb71121000d37146		false	535850	1026	119	0	0	0	0	1	undefined	58de3af0eb71121000d36d61
	false	undefined	0							undefined	0	58de3d08eb71121000d37147		false	536382	1027	119	0	0	0	0	1	undefined	58de3af0eb71121000d36d61
	false	undefined	0							undefined	0	58de3d09eb71121000d37148		false	536916	1028	117	0	0	0	0	1	undefined	58de3af0eb71121000d36d61
	false	undefined	0							undefined	0	58de3d09eb71121000d37149		false	537454	1029	118	0	0	0	0	1	undefined	58de3af0eb71121000d36d61
	false	undefined	0							undefined	0	58de3d0aeb71121000d3714a		false	537987	1030	119	0	0	0	0	1	undefined	58de3af0eb71121000d36d61
	false	undefined	0							undefined	0	58de3d0aeb71121000d3714b		false	538519	1031	120	0	0	0	0	1	undefined	58de3af0eb71121000d36d61
	false	undefined	0							undefined	0	58de3d0beb71121000d3714c		false	539052	1032	119	0	0	0	0	1	undefined	58de3af0eb71121000d36d61
	false	undefined	0							undefined	0	58de3d0beb71121000d3714d		false	539584	1033	118	0	0	0	0	1	undefined	58de3af0eb71121000d36d61
	false	undefined	0							undefined	0	58de3d0ceb71121000d3714e		false	540138	1034	117	0	0	0	0	1	undefined	58de3af0eb71121000d36d61
	false	undefined	0							undefined	0	58de3d0ceb71121000d3714f		false	540671	1035	118	0	0	0	0	1	undefined	58de3af0eb71121000d36d61
	false	undefined	0							undefined	0	58de3d0deb71121000d37150		true	541202	1036	118	0	0	0	0	1	undefined	58de3af0eb71121000d36d61
	false	undefined	0							undefined	0	58de3d0deb71121000d37151		true	541724	1037	119	0	0	0	0	1	undefined	58de3af0eb71121000d36d61
	false	undefined	0							undefined	0	58de3d0eeb71121000d37152		false	542255	1038	119	0	0	0	0	1	undefined	58de3af0eb71121000d36d61
	false	undefined	0							undefined	0	58de3d0feb71121000d37153		false	542804	1039	120	0	0	0	0	1	undefined	58de3af0eb71121000d36d61
	false	undefined	0							undefined	0	58de3d0feb71121000d37154		false	543327	1040	121	0	0	0	0	1	undefined	58de3af0eb71121000d36d61
	false	undefined	0							undefined	0	58de3d10eb71121000d37155		false	543864	1041	121	0	0	0	0	1	undefined	58de3af0eb71121000d36d61
	false	undefined	0							undefined	0	58de3d10eb71121000d37156		false	544401	1042	119	0	0	0	0	1	undefined	58de3af0eb71121000d36d61
	false	undefined	0							undefined	0	58de3d11eb71121000d37157		false	544937	1043	120	0	0	0	0	1	undefined	58de3af0eb71121000d36d61
	false	undefined	0							undefined	0	58de3d11eb71121000d37158		false	545474	1044	121	0	0	0	0	1	undefined	58de3af0eb71121000d36d61
	false	undefined	0							undefined	0	58de3d12eb71121000d37159		false	546003	1045	120	0	0	0	0	1	undefined	58de3af0eb71121000d36d61
	false	undefined	0							undefined	0	58de3d12eb71121000d3715a		false	546537	1046	121	0	0	0	0	1	undefined	58de3af0eb71121000d36d61
	false	undefined	0							undefined	0	58de3d13eb71121000d3715b		false	547073	1047	122	0	0	0	0	1	undefined	58de3af0eb71121000d36d61
	false	undefined	0							undefined	0	58de3d13eb71121000d3715c		false	547605	1048	123	0	0	0	0	1	undefined	58de3af0eb71121000d36d61
	false	undefined	0							undefined	0	58de3d14eb71121000d3715d		false	548152	1049	121	0	0	0	0	1	undefined	58de3af0eb71121000d36d61
	false	undefined	0							undefined	0	58de3d14eb71121000d3715e		true	548677	1050	112	0	0	0	0	1	undefined	58de3af0eb71121000d36d61
	false	undefined	0							undefined	0	58de3d15eb71121000d3715f		true	549208	1051	107	0	0	0	0	1	undefined	58de3af0eb71121000d36d61
	false	undefined	0							undefined	0	58de3d15eb71121000d37160		true	549740	1052	-1	0	0	0	0	1	undefined	58de3af0eb71121000d36d61
	false	undefined	0							undefined	0	58de3d16eb71121000d37161		true	550278	1053	-1	0	0	0	0	1	undefined	58de3af0eb71121000d36d61
	false	undefined	0							undefined	0	58de3d17eb71121000d37162		false	550811	1054	-1	0	0	0	0	1	undefined	58de3af0eb71121000d36d61
	false	undefined	0							undefined	0	58de3d17eb71121000d37163		false	551340	1058	-1	0	0	0	0	1	undefined	58de3af0eb71121000d36d61
	false	undefined	0							undefined	0	58de3d18eb71121000d37164		false	551894	1059	-1	0	0	0	0	1	undefined	58de3af0eb71121000d36d61
	false	undefined	0							undefined	0	58de3d18eb71121000d37165		false	552426	1060	-1	0	0	0	0	1	undefined	58de3af0eb71121000d36d61
	false	undefined	0							undefined	0	58de3d19eb71121000d37166		false	552959	1061	-1	0	0	0	0	1	undefined	58de3af0eb71121000d36d61
	false	undefined	0							undefined	0	58de3d19eb71121000d37167		false	553489	1062	-1	0	0	0	0	1	undefined	58de3af0eb71121000d36d61
	false	undefined	0							undefined	0	58de3d1aeb71121000d37168		false	554018	1063	-1	0	0	0	0	1	undefined	58de3af0eb71121000d36d61
	false	undefined	0							undefined	0	58de3d1aeb71121000d37169		false	554565	1064	-1	0	0	0	0	1	undefined	58de3af0eb71121000d36d61
	false	undefined	0							undefined	0	58de3d1beb71121000d3716a		false	555094	1065	-1	0	0	0	0	1	undefined	58de3af0eb71121000d36d61
	false	undefined	0							undefined	0	58de3d1beb71121000d3716b		false	555624	1066	-1	0	0	0	0	1	undefined	58de3af0eb71121000d36d61
	false	undefined	0							undefined	0	58de3d1ceb71121000d3716c		false	556157	1067	-1	0	0	0	0	1	undefined	58de3af0eb71121000d36d61
	false	undefined	0							undefined	0	58de3d1ceb71121000d3716d		false	556689	1068	-1	0	0	0	0	1	undefined	58de3af0eb71121000d36d61
	false	undefined	0							undefined	0	58de3d1deb71121000d3716e		false	557221	1069	-1	0	0	0	0	1	undefined	58de3af0eb71121000d36d61
	false	undefined	0							undefined	0	58de3d1deb71121000d3716f		false	557759	1070	-1	0	0	0	0	1	undefined	58de3af0eb71121000d36d61
	false	undefined	0							undefined	0	58de3d1eeb71121000d37170		false	558291	1071	-1	0	0	0	0	1	undefined	58de3af0eb71121000d36d61
	false	undefined	0							undefined	0	58de3d1feb71121000d37171		false	558827	1072	-1	0	0	0	0	1	undefined	58de3af0eb71121000d36d61
	false	undefined	0							undefined	0	58de3d1feb71121000d37172		false	559360	1073	-1	0	0	0	0	1	undefined	58de3af0eb71121000d36d61
	false	undefined	0							undefined	0	58de3d20eb71121000d37173		false	559896	1074	-1	0	0	0	0	1	undefined	58de3af0eb71121000d36d61
	false	undefined	0							undefined	0	58de3d20eb71121000d37174		false	560438	1075	63	0	0	0	0	1	undefined	58de3af0eb71121000d36d61
	false	undefined	0							undefined	0	58de3d21eb71121000d37175		true	560967	1076	-1	0	0	0	0	1	undefined	58de3af0eb71121000d36d61
	false	undefined	0							undefined	0	58de3d21eb71121000d37176		true	561498	1077	-1	0	0	0	0	1	undefined	58de3af0eb71121000d36d61
	false	undefined	0							undefined	0	58de3d22eb71121000d37177		true	562032	1081	63	0	0	0	0	1	undefined	58de3af0eb71121000d36d61
	false	undefined	0							undefined	0	58de3d22eb71121000d37178		true	562580	1082	-1	0	0	0	0	1	undefined	58de3af0eb71121000d36d61
	false	undefined	0							undefined	0	58de3d23eb71121000d37179		true	563114	1083	-1	0	0	0	0	1	undefined	58de3af0eb71121000d36d61
	false	undefined	0							undefined	0	58de3d23eb71121000d3717a		true	563648	1084	-1	0	0	0	0	1	undefined	58de3af0eb71121000d36d61
	false	undefined	0							undefined	0	58de3d24eb71121000d3717b		true	564186	1085	-1	0	0	0	0	1	undefined	58de3af0eb71121000d36d61
	false	undefined	0							undefined	0	58de3d24eb71121000d3717c		true	564714	1086	-1	0	0	0	0	1	undefined	58de3af0eb71121000d36d61
	false	undefined	0							undefined	0	58de3d25eb71121000d3717d		true	565245	1087	-1	0	0	0	0	1	undefined	58de3af0eb71121000d36d61
	false	undefined	0							undefined	0	58de3d25eb71121000d3717e		true	565780	1088	-1	0	0	0	0	1	undefined	58de3af0eb71121000d36d61
	false	undefined	0							undefined	0	58de3d26eb71121000d3717f		true	566312	1089	-1	0	0	0	0	1	undefined	58de3af0eb71121000d36d61
	false	undefined	0							undefined	0	58de3d27eb71121000d37180		true	566852	1090	-1	0	0	0	0	1	undefined	58de3af0eb71121000d36d61
	false	undefined	0							undefined	0	58de3d27eb71121000d37181		true	567383	1091	-1	0	0	0	0	1	undefined	58de3af0eb71121000d36d61
	false	undefined	0							undefined	0	58de3d28eb71121000d37182		true	567916	1092	-1	0	0	0	0	1	undefined	58de3af0eb71121000d36d61
	false	undefined	0							undefined	0	58de3d28eb71121000d37183		true	568454	1093	-1	0	0	0	0	1	undefined	58de3af0eb71121000d36d61
	false	undefined	0							undefined	0	58de3d29eb71121000d37184		true	568991	1094	-1	0	0	0	0	1	undefined	58de3af0eb71121000d36d61
	false	undefined	0							undefined	0	58de3d29eb71121000d37185		true	569514	1095	-1	0	0	0	0	1	undefined	58de3af0eb71121000d36d61
	false	undefined	0							undefined	0	58de3d2aeb71121000d37186		false	570058	1096	-1	0	0	0	0	1	undefined	58de3af0eb71121000d36d61
	false	undefined	0							undefined	0	58de3d2aeb71121000d37187		false	570588	1097	-1	0	0	0	0	1	undefined	58de3af0eb71121000d36d61
	false	undefined	0							undefined	0	58de3d2beb71121000d37188		false	571122	1098	-1	0	0	0	0	1	undefined	58de3af0eb71121000d36d61
	false	undefined	0							undefined	0	58de3d2beb71121000d37189		false	571654	1099	-1	0	0	0	0	1	undefined	58de3af0eb71121000d36d61
	false	undefined	0							undefined	0	58de3d2ceb71121000d3718a		false	572191	1100	-1	0	0	0	0	1	undefined	58de3af0eb71121000d36d61
	false	undefined	0							undefined	0	58de3d2ceb71121000d3718b		false	572724	1101	-1	0	0	0	0	1	undefined	58de3af0eb71121000d36d61
	false	undefined	0							undefined	0	58de3d2deb71121000d3718c		false	573281	1105	-1	0	0	0	0	1	undefined	58de3af0eb71121000d36d61
[truncated: 34 more columns]
