# Supplementary material for: Real-Time Chest Compression Quality Measurements by Smartphone Camera
Source: J Healthc Eng. 2018 Oct 28;2018:6241856. doi: 10.1155/2018/6241856 (PMC6277120; doi:10.1155/2018/6241856)
Supplement: Supplementary Materials — The supplementary material consists data files for each of the five presented experiments. For the first four experiments, the data are presented for each test person as Matlab mat-files containing both the compared reference data and the detection data. For the fifth test, CPR summary report test, the data is presented as ssx-files (reference data) and xls-files (detection data). A readme-file explaining the preprocessing performed prior to the comparison between reference data and detection data is here also included. [file 6241856.f1.zip › 6241856.f1/Data files/Test 5. CPR summary report/TestData/TP2/TP2.xls]

## Sheet: geir
$__	isNew	errors	_maxListeners	_doc	_pres	_posts	save	db	collection	discriminators	__v	id	_id	scepticalToFrequency	mse	sequence	rate	pp2pt	p2et	s2pt	rd	pd	edt	sid	schema	$__delta	$__version	increment	$__where	remove	model	$__buildDoc	init	$__storeShard	hook	pre	post	removePre	_lazySetupHooks	update	set	$__shouldModify	$__set	getValue	setValue	get	$__path	markModified	$__try
	false	undefined	0							undefined	0	58e3820f5ba4cb100097f2ea		true	628	0	0	0	0	0	0	1	undefined	58e3820e5ba4cb100097f2e9
	false	undefined	0							undefined	0	58e3820f5ba4cb100097f2eb		true	1310	1	0	0	0	0	0	1	undefined	58e3820e5ba4cb100097f2e9
	false	undefined	0							undefined	0	58e382105ba4cb100097f2ec		true	1823	2	0	0	0	0	0	1	undefined	58e3820e5ba4cb100097f2e9
	false	undefined	0							undefined	0	58e382105ba4cb100097f2ed		true	2377	3	0	0	0	0	0	1	undefined	58e3820e5ba4cb100097f2e9
	false	undefined	0							undefined	0	58e382115ba4cb100097f2ee		true	2849	4	0	0	0	0	0	1	undefined	58e3820e5ba4cb100097f2e9
	false	undefined	0							undefined	0	58e382115ba4cb100097f2ef		true	3384	5	61	0	0	0	0	1	undefined	58e3820e5ba4cb100097f2e9
	false	undefined	0							undefined	0	58e382125ba4cb100097f2f0		true	3918	6	64	0	0	0	0	1	undefined	58e3820e5ba4cb100097f2e9
	false	undefined	0							undefined	0	58e382125ba4cb100097f2f1		true	4392	7	-1	0	0	0	0	1	undefined	58e3820e5ba4cb100097f2e9
	false	undefined	0							undefined	0	58e382135ba4cb100097f2f2		true	4913	11	161	0	0	0	0	1	undefined	58e3820e5ba4cb100097f2e9
	false	undefined	0							undefined	0	58e382145ba4cb100097f2f3		true	5457	12	-1	0	0	0	0	1	undefined	58e3820e5ba4cb100097f2e9
	false	undefined	0							undefined	0	58e382145ba4cb100097f2f4		true	6055	13	-1	0	0	0	0	1	undefined	58e3820e5ba4cb100097f2e9
	false	undefined	0							undefined	0	58e382155ba4cb100097f2f5		false	6523	14	47	0	0	0	0	1	undefined	58e3820e5ba4cb100097f2e9
	false	undefined	0							undefined	0	58e382155ba4cb100097f2f6		false	7249	15	46	0	0	0	0	1	undefined	58e3820e5ba4cb100097f2e9
	false	undefined	0							undefined	0	58e382165ba4cb100097f2f7		false	7581	16	46	0	0	0	0	1	undefined	58e3820e5ba4cb100097f2e9
	false	undefined	0							undefined	0	58e382165ba4cb100097f2f8		true	8112	17	47	0	0	0	0	1	undefined	58e3820e5ba4cb100097f2e9
	false	undefined	0							undefined	0	58e382175ba4cb100097f2f9		true	8657	18	46	0	0	0	0	1	undefined	58e3820e5ba4cb100097f2e9
	false	undefined	0							undefined	0	58e382175ba4cb100097f2fa		true	9190	19	48	0	0	0	0	1	undefined	58e3820e5ba4cb100097f2e9
	false	undefined	0							undefined	0	58e382185ba4cb100097f2fb		true	9789	20	52	0	0	0	0	1	undefined	58e3820e5ba4cb100097f2e9
	false	undefined	0							undefined	0	58e382185ba4cb100097f2fc		true	10319	21	42	0	0	0	0	1	undefined	58e3820e5ba4cb100097f2e9
	false	undefined	0							undefined	0	58e382195ba4cb100097f2fd		true	10860	22	39	0	0	0	0	1	undefined	58e3820e5ba4cb100097f2e9
	false	undefined	0							undefined	0	58e3821a5ba4cb100097f2fe		true	11475	32	47	0	0	0	0	1	undefined	58e3820e5ba4cb100097f2e9
	false	undefined	0							undefined	0	58e3821a5ba4cb100097f2ff		true	12089	33	51	0	0	0	0	1	undefined	58e3820e5ba4cb100097f2e9
	false	undefined	0							undefined	0	58e3821b5ba4cb100097f300		true	12589	34	51	0	0	0	0	1	undefined	58e3820e5ba4cb100097f2e9
	false	undefined	0							undefined	0	58e3821b5ba4cb100097f301		true	13213	35	-1	0	0	0	0	1	undefined	58e3820e5ba4cb100097f2e9
	false	undefined	0							undefined	0	58e3821c5ba4cb100097f302		true	13650	36	-1	0	0	0	0	1	undefined	58e3820e5ba4cb100097f2e9
	false	undefined	0							undefined	0	58e3821c5ba4cb100097f303		true	14266	37	52	0	0	0	0	1	undefined	58e3820e5ba4cb100097f2e9
	false	undefined	0							undefined	0	58e3821d5ba4cb100097f304		true	14721	38	51	0	0	0	0	1	undefined	58e3820e5ba4cb100097f2e9
	false	undefined	0							undefined	0	58e3821d5ba4cb100097f305		true	15320	39	51	0	0	0	0	1	undefined	58e3820e5ba4cb100097f2e9
	false	undefined	0							undefined	0	58e3821e5ba4cb100097f306		true	15827	40	51	0	0	0	0	1	undefined	58e3820e5ba4cb100097f2e9
	false	undefined	0							undefined	0	58e3821e5ba4cb100097f307		true	16405	41	50	0	0	0	0	1	undefined	58e3820e5ba4cb100097f2e9
	false	undefined	0							undefined	0	58e3821f5ba4cb100097f308		false	17014	42	48	0	0	0	0	1	undefined	58e3820e5ba4cb100097f2e9
	false	undefined	0							undefined	0	58e382205ba4cb100097f309		true	17600	43	53	0	0	0	0	1	undefined	58e3820e5ba4cb100097f2e9
	false	undefined	0							undefined	0	58e382205ba4cb100097f30a		true	18076	44	55	0	0	0	0	1	undefined	58e3820e5ba4cb100097f2e9
	false	undefined	0							undefined	0	58e382215ba4cb100097f30b		false	18593	45	39	0	0	0	0	1	undefined	58e3820e5ba4cb100097f2e9
	false	undefined	0							undefined	0	58e382215ba4cb100097f30c		true	19117	55	51	0	0	0	0	1	undefined	58e3820e5ba4cb100097f2e9
	false	undefined	0							undefined	0	58e382225ba4cb100097f30d		true	19635	56	43	0	0	0	0	1	undefined	58e3820e5ba4cb100097f2e9
	false	undefined	0							undefined	0	58e382225ba4cb100097f30e		true	20204	57	40	0	0	0	0	1	undefined	58e3820e5ba4cb100097f2e9
	false	undefined	0							undefined	0	58e382235ba4cb100097f30f		true	20740	58	66	0	0	0	0	1	undefined	58e3820e5ba4cb100097f2e9
	false	undefined	0							undefined	0	58e382235ba4cb100097f310		true	21274	59	-1	0	0	0	0	1	undefined	58e3820e5ba4cb100097f2e9
	false	undefined	0							undefined	0	58e382245ba4cb100097f311		true	21817	60	-1	0	0	0	0	1	undefined	58e3820e5ba4cb100097f2e9
	false	undefined	0							undefined	0	58e382245ba4cb100097f312		true	22273	61	-1	0	0	0	0	1	undefined	58e3820e5ba4cb100097f2e9
	false	undefined	0							undefined	0	58e382255ba4cb100097f313		true	22809	62	-1	0	0	0	0	1	undefined	58e3820e5ba4cb100097f2e9
	false	undefined	0							undefined	0	58e382255ba4cb100097f314		false	23301	63	-1	0	0	0	0	1	undefined	58e3820e5ba4cb100097f2e9
	false	undefined	0							undefined	0	58e382265ba4cb100097f315		false	23822	64	-1	0	0	0	0	1	undefined	58e3820e5ba4cb100097f2e9
	false	undefined	0							undefined	0	58e382275ba4cb100097f316		false	24437	65	-1	0	0	0	0	1	undefined	58e3820e5ba4cb100097f2e9
	false	undefined	0							undefined	0	58e382275ba4cb100097f317		true	24949	66	-1	0	0	0	0	1	undefined	58e3820e5ba4cb100097f2e9
	false	undefined	0							undefined	0	58e382285ba4cb100097f318		true	25474	67	75	0	0	0	0	1	undefined	58e3820e5ba4cb100097f2e9
	false	undefined	0							undefined	0	58e382285ba4cb100097f319		true	26002	68	-1	0	0	0	0	1	undefined	58e3820e5ba4cb100097f2e9
	false	undefined	0							undefined	0	58e382295ba4cb100097f31a		true	26541	69	110	0	0	0	0	1	undefined	58e3820e5ba4cb100097f2e9
	false	undefined	0							undefined	0	58e382295ba4cb100097f31b		false	27078	70	110	0	0	0	0	1	undefined	58e3820e5ba4cb100097f2e9
	false	undefined	0							undefined	0	58e3822a5ba4cb100097f31c		true	27623	71	112	0	0	0	0	1	undefined	58e3820e5ba4cb100097f2e9
	false	undefined	0							undefined	0	58e3822a5ba4cb100097f31d		false	28152	72	119	0	0	0	0	1	undefined	58e3820e5ba4cb100097f2e9
	false	undefined	0							undefined	0	58e3822b5ba4cb100097f31e		false	28619	73	116	0	0	0	0	1	undefined	58e3820e5ba4cb100097f2e9
	false	undefined	0							undefined	0	58e3822b5ba4cb100097f31f		false	29233	74	117	0	0	0	0	1	undefined	58e3820e5ba4cb100097f2e9
	false	undefined	0							undefined	0	58e3822c5ba4cb100097f320		false	29767	75	117	0	0	0	0	1	undefined	58e3820e5ba4cb100097f2e9
	false	undefined	0							undefined	0	58e3822c5ba4cb100097f321		false	30311	76	115	0	0	0	0	1	undefined	58e3820e5ba4cb100097f2e9
	false	undefined	0							undefined	0	58e3822d5ba4cb100097f322		false	30789	77	114	0	0	0	0	1	undefined	58e3820e5ba4cb100097f2e9
	false	undefined	0							undefined	0	58e3822d5ba4cb100097f323		false	31283	78	110	0	0	0	0	1	undefined	58e3820e5ba4cb100097f2e9
	false	undefined	0							undefined	0	58e3822e5ba4cb100097f324		false	31820	79	112	0	0	0	0	1	undefined	58e3820e5ba4cb100097f2e9
	false	undefined	0							undefined	0	58e3822e5ba4cb100097f325		false	32346	80	108	0	0	0	0	1	undefined	58e3820e5ba4cb100097f2e9
	false	undefined	0							undefined	0	58e3822f5ba4cb100097f326		false	32851	81	105	0	0	0	0	1	undefined	58e3820e5ba4cb100097f2e9
	false	undefined	0							undefined	0	58e3822f5ba4cb100097f327		false	33360	82	100	0	0	0	0	1	undefined	58e3820e5ba4cb100097f2e9
	false	undefined	0							undefined	0	58e382305ba4cb100097f328		false	33902	83	100	0	0	0	0	1	undefined	58e3820e5ba4cb100097f2e9
	false	undefined	0							undefined	0	58e382315ba4cb100097f329		false	34511	84	102	0	0	0	0	1	undefined	58e3820e5ba4cb100097f2e9
	false	undefined	0							undefined	0	58e382315ba4cb100097f32a		false	35020	85	101	0	0	0	0	1	undefined	58e3820e5ba4cb100097f2e9
	false	undefined	0							undefined	0	58e382325ba4cb100097f32b		false	35569	86	101	0	0	0	0	1	undefined	58e3820e5ba4cb100097f2e9
	false	undefined	0							undefined	0	58e382325ba4cb100097f32c		false	36092	87	99	0	0	0	0	1	undefined	58e3820e5ba4cb100097f2e9
	false	undefined	0							undefined	0	58e382335ba4cb100097f32d		false	36568	88	99	0	0	0	0	1	undefined	58e3820e5ba4cb100097f2e9
	false	undefined	0							undefined	0	58e382335ba4cb100097f32e		false	37189	89	100	0	0	0	0	1	undefined	58e3820e5ba4cb100097f2e9
	false	undefined	0							undefined	0	58e382345ba4cb100097f32f		false	37698	90	99	0	0	0	0	1	undefined	58e3820e5ba4cb100097f2e9
	false	undefined	0							undefined	0	58e382345ba4cb100097f330		false	38240	91	100	0	0	0	0	1	undefined	58e3820e5ba4cb100097f2e9
	false	undefined	0							undefined	0	58e382355ba4cb100097f331		false	38781	92	99	0	0	0	0	1	undefined	58e3820e5ba4cb100097f2e9
	false	undefined	0							undefined	0	58e382355ba4cb100097f332		false	39295	93	100	0	0	0	0	1	undefined	58e3820e5ba4cb100097f2e9
	false	undefined	0							undefined	0	58e382365ba4cb100097f333		false	39783	94	101	0	0	0	0	1	undefined	58e3820e5ba4cb100097f2e9
	false	undefined	0							undefined	0	58e382365ba4cb100097f334		false	40391	95	102	0	0	0	0	1	undefined	58e3820e5ba4cb100097f2e9
	false	undefined	0							undefined	0	58e382375ba4cb100097f335		false	40915	96	103	0	0	0	0	1	undefined	58e3820e5ba4cb100097f2e9
	false	undefined	0							undefined	0	58e382385ba4cb100097f336		false	41452	97	105	0	0	0	0	1	undefined	58e3820e5ba4cb100097f2e9
	false	undefined	0							undefined	0	58e382385ba4cb100097f337		false	41974	98	104	0	0	0	0	1	undefined	58e3820e5ba4cb100097f2e9
	false	undefined	0							undefined	0	58e382395ba4cb100097f338		false	42519	99	105	0	0	0	0	1	undefined	58e3820e5ba4cb100097f2e9
	false	undefined	0							undefined	0	58e382395ba4cb100097f339		false	43049	100	105	0	0	0	0	1	undefined	58e3820e5ba4cb100097f2e9
	false	undefined	0							undefined	0	58e3823a5ba4cb100097f33a		false	43581	101	104	0	0	0	0	1	undefined	58e3820e5ba4cb100097f2e9
	false	undefined	0							undefined	0	58e3823a5ba4cb100097f33b		false	44051	102	103	0	0	0	0	1	undefined	58e3820e5ba4cb100097f2e9
	false	undefined	0							undefined	0	58e3823b5ba4cb100097f33c		false	44596	103	102	0	0	0	0	1	undefined	58e3820e5ba4cb100097f2e9
	false	undefined	0							undefined	0	58e3823b5ba4cb100097f33d		false	45194	104	103	0	0	0	0	1	undefined	58e3820e5ba4cb100097f2e9
	false	undefined	0							undefined	0	58e3823c5ba4cb100097f33e		false	45726	105	103	0	0	0	0	1	undefined	58e3820e5ba4cb100097f2e9
	false	undefined	0							undefined	0	58e3823c5ba4cb100097f33f		false	46279	106	100	0	0	0	0	1	undefined	58e3820e5ba4cb100097f2e9
	false	undefined	0							undefined	0	58e3823d5ba4cb100097f340		false	46862	107	102	0	0	0	0	1	undefined	58e3820e5ba4cb100097f2e9
	false	undefined	0							undefined	0	58e3823d5ba4cb100097f341		false	47380	108	105	0	0	0	0	1	undefined	58e3820e5ba4cb100097f2e9
	false	undefined	0							undefined	0	58e3823e5ba4cb100097f342		false	47858	109	103	0	0	0	0	1	undefined	58e3820e5ba4cb100097f2e9
	false	undefined	0							undefined	0	58e3823f5ba4cb100097f343		false	48513	110	104	0	0	0	0	1	undefined	58e3820e5ba4cb100097f2e9
	false	undefined	0							undefined	0	58e3823f5ba4cb100097f344		false	49010	111	105	0	0	0	0	1	undefined	58e3820e5ba4cb100097f2e9
	false	undefined	0							undefined	0	58e382405ba4cb100097f345		false	49522	112	109	0	0	0	0	1	undefined	58e3820e5ba4cb100097f2e9
	false	undefined	0							undefined	0	58e382405ba4cb100097f346		false	50016	113	109	0	0	0	0	1	undefined	58e3820e5ba4cb100097f2e9
	false	undefined	0							undefined	0	58e382415ba4cb100097f347		false	50593	114	106	0	0	0	0	1	undefined	58e3820e5ba4cb100097f2e9
	false	undefined	0							undefined	0	58e382415ba4cb100097f348		false	51131	115	109	0	0	0	0	1	undefined	58e3820e5ba4cb100097f2e9
	false	undefined	0							undefined	0	58e382425ba4cb100097f349		false	51664	116	106	0	0	0	0	1	undefined	58e3820e5ba4cb100097f2e9
	false	undefined	0							undefined	0	58e382425ba4cb100097f34a		false	52216	117	105	0	0	0	0	1	undefined	58e3820e5ba4cb100097f2e9
	false	undefined	0							undefined	0	58e382435ba4cb100097f34b		false	52794	118	105	0	0	0	0	1	undefined	58e3820e5ba4cb100097f2e9
	false	undefined	0							undefined	0	58e382435ba4cb100097f34c		false	53333	119	103	0	0	0	0	1	undefined	58e3820e5ba4cb100097f2e9
	false	undefined	0							undefined	0	58e382445ba4cb100097f34d		false	53876	120	103	0	0	0	0	1	undefined	58e3820e5ba4cb100097f2e9
	false	undefined	0							undefined	0	58e382445ba4cb100097f34e		false	54417	121	103	0	0	0	0	1	undefined	58e3820e5ba4cb100097f2e9
	false	undefined	0							undefined	0	58e382455ba4cb100097f34f		false	54881	122	108	0	0	0	0	1	undefined	58e3820e5ba4cb100097f2e9
	false	undefined	0							undefined	0	58e382455ba4cb100097f350		false	55411	123	108	0	0	0	0	1	undefined	58e3820e5ba4cb100097f2e9
	false	undefined	0							undefined	0	58e382465ba4cb100097f351		false	56083	124	105	0	0	0	0	1	undefined	58e3820e5ba4cb100097f2e9
	false	undefined	0							undefined	0	58e382475ba4cb100097f352		false	56549	125	104	0	0	0	0	1	undefined	58e3820e5ba4cb100097f2e9
	false	undefined	0							undefined	0	58e382475ba4cb100097f353		false	57089	126	103	0	0	0	0	1	undefined	58e3820e5ba4cb100097f2e9
	false	undefined	0							undefined	0	58e382485ba4cb100097f354		false	57611	127	102	0	0	0	0	1	undefined	58e3820e5ba4cb100097f2e9
	false	undefined	0							undefined	0	58e382485ba4cb100097f355		false	58135	128	101	0	0	0	0	1	undefined	58e3820e5ba4cb100097f2e9
	false	undefined	0							undefined	0	58e382495ba4cb100097f356		false	58683	129	102	0	0	0	0	1	undefined	58e3820e5ba4cb100097f2e9
	false	undefined	0							undefined	0	58e382495ba4cb100097f357		false	59224	130	103	0	0	0	0	1	undefined	58e3820e5ba4cb100097f2e9
	false	undefined	0							undefined	0	58e3824a5ba4cb100097f358		false	59825	131	105	0	0	0	0	1	undefined	58e3820e5ba4cb100097f2e9
	false	undefined	0							undefined	0	58e3824a5ba4cb100097f359		false	60290	132	104	0	0	0	0	1	undefined	58e3820e5ba4cb100097f2e9
	false	undefined	0							undefined	0	58e3824b5ba4cb100097f35a		false	60820	133	103	0	0	0	0	1	undefined	58e3820e5ba4cb100097f2e9
	false	undefined	0							undefined	0	58e3824b5ba4cb100097f35b		false	61283	134	103	0	0	0	0	1	undefined	58e3820e5ba4cb100097f2e9
	false	undefined	0							undefined	0	58e3824c5ba4cb100097f35c		false	61881	135	106	0	0	0	0	1	undefined	58e3820e5ba4cb100097f2e9
	false	undefined	0							undefined	0	58e3824c5ba4cb100097f35d		false	62433	136	108	0	0	0	0	1	undefined	58e3820e5ba4cb100097f2e9
	false	undefined	0							undefined	0	58e3824d5ba4cb100097f35e		false	62910	137	108	0	0	0	0	1	undefined	58e3820e5ba4cb100097f2e9
	false	undefined	0							undefined	0	58e3824e5ba4cb100097f35f		false	63493	138	110	0	0	0	0	1	undefined	58e3820e5ba4cb100097f2e9
	false	undefined	0							undefined	0	58e3824e5ba4cb100097f360		false	63945	139	109	0	0	0	0	1	undefined	58e3820e5ba4cb100097f2e9
	false	undefined	0							undefined	0	58e3824f5ba4cb100097f361		false	64510	140	110	0	0	0	0	1	undefined	58e3820e5ba4cb100097f2e9
	false	undefined	0							undefined	0	58e3824f5ba4cb100097f362		false	64984	141	108	0	0	0	0	1	undefined	58e3820e5ba4cb100097f2e9
	false	undefined	0							undefined	0	58e382505ba4cb100097f363		false	65561	142	107	0	0	0	0	1	undefined	58e3820e5ba4cb100097f2e9
	false	undefined	0							undefined	0	58e382505ba4cb100097f364		false	66101	143	107	0	0	0	0	1	undefined	58e3820e5ba4cb100097f2e9
	false	undefined	0							undefined	0	58e382515ba4cb100097f365		false	66632	144	108	0	0	0	0	1	undefined	58e3820e5ba4cb100097f2e9
	false	undefined	0							undefined	0	58e382515ba4cb100097f366		false	67171	145	108	0	0	0	0	1	undefined	58e3820e5ba4cb100097f2e9
	false	undefined	0							undefined	0	58e382525ba4cb100097f367		false	67699	146	108	0	0	0	0	1	undefined	58e3820e5ba4cb100097f2e9
	false	undefined	0							undefined	0	58e382525ba4cb100097f368		false	68300	147	109	0	0	0	0	1	undefined	58e3820e5ba4cb100097f2e9
	false	undefined	0							undefined	0	58e382535ba4cb100097f369		false	68765	148	109	0	0	0	0	1	undefined	58e3820e5ba4cb100097f2e9
	false	undefined	0							undefined	0	58e382535ba4cb100097f36a		false	69307	149	110	0	0	0	0	1	undefined	58e3820e5ba4cb100097f2e9
	false	undefined	0							undefined	0	58e382545ba4cb100097f36b		false	69758	150	109	0	0	0	0	1	undefined	58e3820e5ba4cb100097f2e9
	false	undefined	0							undefined	0	58e382545ba4cb100097f36c		false	70294	151	111	0	0	0	0	1	undefined	58e3820e5ba4cb100097f2e9
	false	undefined	0							undefined	0	58e382555ba4cb100097f36d		false	70852	152	110	0	0	0	0	1	undefined	58e3820e5ba4cb100097f2e9
	false	undefined	0							undefined	0	58e382555ba4cb100097f36e		false	71379	153	109	0	0	0	0	1	undefined	58e3820e5ba4cb100097f2e9
	false	undefined	0							undefined	0	58e382565ba4cb100097f36f		false	71896	154	109	0	0	0	0	1	undefined	58e3820e5ba4cb100097f2e9
	false	undefined	0							undefined	0	58e382575ba4cb100097f370		false	72512	155	109	0	0	0	0	1	undefined	58e3820e5ba4cb100097f2e9
	false	undefined	0							undefined	0	58e382575ba4cb100097f371		false	73001	156	108	0	0	0	0	1	undefined	58e3820e5ba4cb100097f2e9
	false	undefined	0							undefined	0	58e382585ba4cb100097f372		false	73517	157	108	0	0	0	0	1	undefined	58e3820e5ba4cb100097f2e9
	false	undefined	0							undefined	0	58e382585ba4cb100097f373		false	74049	158	108	0	0	0	0	1	undefined	58e3820e5ba4cb100097f2e9
	false	undefined	0							undefined	0	58e382595ba4cb100097f374		false	74585	159	107	0	0	0	0	1	undefined	58e3820e5ba4cb100097f2e9
	false	undefined	0							undefined	0	58e382595ba4cb100097f375		false	75166	160	110	0	0	0	0	1	undefined	58e3820e5ba4cb100097f2e9
	false	undefined	0							undefined	0	58e3825a5ba4cb100097f376		false	75661	161	111	0	0	0	0	1	undefined	58e3820e5ba4cb100097f2e9
	false	undefined	0							undefined	0	58e3825a5ba4cb100097f377		false	76180	162	112	0	0	0	0	1	undefined	58e3820e5ba4cb100097f2e9
	false	undefined	0							undefined	0	58e3825b5ba4cb100097f378		false	76721	163	110	0	0	0	0	1	undefined	58e3820e5ba4cb100097f2e9
	false	undefined	0							undefined	0	58e3825b5ba4cb100097f379		false	77253	164	108	0	0	0	0	1	undefined	58e3820e5ba4cb100097f2e9
	false	undefined	0							undefined	0	58e3825c5ba4cb100097f37a		false	77794	165	107	0	0	0	0	1	undefined	58e3820e5ba4cb100097f2e9
	false	undefined	0							undefined	0	58e3825c5ba4cb100097f37b		false	78370	166	109	0	0	0	0	1	undefined	58e3820e5ba4cb100097f2e9
	false	undefined	0							undefined	0	58e3825d5ba4cb100097f37c		false	78929	167	109	0	0	0	0	1	undefined	58e3820e5ba4cb100097f2e9
	false	undefined	0							undefined	0	58e3825e5ba4cb100097f37d		false	79466	168	110	0	0	0	0	1	undefined	58e3820e5ba4cb100097f2e9
	false	undefined	0							undefined	0	58e3825e5ba4cb100097f37e		false	79965	169	111	0	0	0	0	1	undefined	58e3820e5ba4cb100097f2e9
	false	undefined	0							undefined	0	58e3825f5ba4cb100097f37f		false	80513	170	108	0	0	0	0	1	undefined	58e3820e5ba4cb100097f2e9
	false	undefined	0							undefined	0	58e3825f5ba4cb100097f380		false	81136	171	110	0	0	0	0	1	undefined	58e3820e5ba4cb100097f2e9
	false	undefined	0							undefined	0	58e382605ba4cb100097f381		false	81714	172	110	0	0	0	0	1	undefined	58e3820e5ba4cb100097f2e9
	false	undefined	0							undefined	0	58e382605ba4cb100097f382		false	82264	173	110	0	0	0	0	1	undefined	58e3820e5ba4cb100097f2e9
	false	undefined	0							undefined	0	58e382615ba4cb100097f383		false	82794	174	111	0	0	0	0	1	undefined	58e3820e5ba4cb100097f2e9
	false	undefined	0							undefined	0	58e382625ba4cb100097f384		false	83424	175	112	0	0	0	0	1	undefined	58e3820e5ba4cb100097f2e9
	false	undefined	0							undefined	0	58e382625ba4cb100097f385		false	83874	176	110	0	0	0	0	1	undefined	58e3820e5ba4cb100097f2e9
	false	undefined	0							undefined	0	58e382635ba4cb100097f386		false	84478	177	113	0	0	0	0	1	undefined	58e3820e5ba4cb100097f2e9
	false	undefined	0							undefined	0	58e382635ba4cb100097f387		false	85006	178	111	0	0	0	0	1	undefined	58e3820e5ba4cb100097f2e9
	false	undefined	0							undefined	0	58e382645ba4cb100097f388		false	85463	179	109	0	0	0	0	1	undefined	58e3820e5ba4cb100097f2e9
	false	undefined	0							undefined	0	58e382645ba4cb100097f389		false	86091	180	109	0	0	0	0	1	undefined	58e3820e5ba4cb100097f2e9
	false	undefined	0							undefined	0	58e382655ba4cb100097f38a		false	86678	181	110	0	0	0	0	1	undefined	58e3820e5ba4cb100097f2e9
	false	undefined	0							undefined	0	58e382655ba4cb100097f38b		false	87220	182	111	0	0	0	0	1	undefined	58e3820e5ba4cb100097f2e9
	false	undefined	0							undefined	0	58e382665ba4cb100097f38c		false	87741	183	108	0	0	0	0	1	undefined	58e3820e5ba4cb100097f2e9
	false	undefined	0							undefined	0	58e382665ba4cb100097f38d		false	88344	184	108	0	0	0	0	1	undefined	58e3820e5ba4cb100097f2e9
	false	undefined	0							undefined	0	58e382675ba4cb100097f38e		false	88866	185	109	0	0	0	0	1	undefined	58e3820e5ba4cb100097f2e9
	false	undefined	0							undefined	0	58e382675ba4cb100097f38f		false	89395	186	107	0	0	0	0	1	undefined	58e3820e5ba4cb100097f2e9
	false	undefined	0							undefined	0	58e382685ba4cb100097f390		false	89892	187	106	0	0	0	0	1	undefined	58e3820e5ba4cb100097f2e9
	false	undefined	0							undefined	0	58e382695ba4cb100097f391		false	90483	188	108	0	0	0	0	1	undefined	58e3820e5ba4cb100097f2e9
	false	undefined	0							undefined	0	58e382695ba4cb100097f392		false	90949	189	108	0	0	0	0	1	undefined	58e3820e5ba4cb100097f2e9
	false	undefined	0							undefined	0	58e3826a5ba4cb100097f393		false	91557	190	109	0	0	0	0	1	undefined	58e3820e5ba4cb100097f2e9
	false	undefined	0							undefined	0	58e3826a5ba4cb100097f394		false	92077	191	109	0	0	0	0	1	undefined	58e3820e5ba4cb100097f2e9
	false	undefined	0							undefined	0	58e3826b5ba4cb100097f395		false	92691	192	108	0	0	0	0	1	undefined	58e3820e5ba4cb100097f2e9
	false	undefined	0							undefined	0	58e3826b5ba4cb100097f396		false	93209	193	108	0	0	0	0	1	undefined	58e3820e5ba4cb100097f2e9
	false	undefined	0							undefined	0	58e3826c5ba4cb100097f397		false	93689	194	105	0	0	0	0	1	undefined	58e3820e5ba4cb100097f2e9
	false	undefined	0							undefined	0	58e3826c5ba4cb100097f398		false	94272	195	107	0	0	0	0	1	undefined	58e3820e5ba4cb100097f2e9
	false	undefined	0							undefined	0	58e3826d5ba4cb100097f399		false	94750	196	105	0	0	0	0	1	undefined	58e3820e5ba4cb100097f2e9
	false	undefined	0							undefined	0	58e3826d5ba4cb100097f39a		false	95291	197	106	0	0	0	0	1	undefined	58e3820e5ba4cb100097f2e9
	false	undefined	0							undefined	0	58e3826e5ba4cb100097f39b		false	95826	198	108	0	0	0	0	1	undefined	58e3820e5ba4cb100097f2e9
	false	undefined	0							undefined	0	58e3826e5ba4cb100097f39c		false	96362	199	106	0	0	0	0	1	undefined	58e3820e5ba4cb100097f2e9
	false	undefined	0							undefined	0	58e3826f5ba4cb100097f39d		false	96891	200	109	0	0	0	0	1	undefined	58e3820e5ba4cb100097f2e9
	false	undefined	0							undefined	0	58e382705ba4cb100097f39e		false	97424	201	108	0	0	0	0	1	undefined	58e3820e5ba4cb100097f2e9
	false	undefined	0							undefined	0	58e382705ba4cb100097f39f		false	97960	202	111	0	0	0	0	1	undefined	58e3820e5ba4cb100097f2e9
	false	undefined	0							undefined	0	58e382715ba4cb100097f3a0		false	98507	203	111	0	0	0	0	1	undefined	58e3820e5ba4cb100097f2e9
	false	undefined	0							undefined	0	58e382715ba4cb100097f3a1		false	99035	204	110	0	0	0	0	1	undefined	58e3820e5ba4cb100097f2e9
	false	undefined	0							undefined	0	58e382725ba4cb100097f3a2		false	99631	205	113	0	0	0	0	1	undefined	58e3820e5ba4cb100097f2e9
	false	undefined	0							undefined	0	58e382725ba4cb100097f3a3		false	100172	206	111	0	0	0	0	1	undefined	58e3820e5ba4cb100097f2e9
	false	undefined	0							undefined	0	58e382735ba4cb100097f3a4		false	100778	207	113	0	0	0	0	1	undefined	58e3820e5ba4cb100097f2e9
	false	undefined	0							undefined	0	58e382735ba4cb100097f3a5		false	101312	208	113	0	0	0	0	1	undefined	58e3820e5ba4cb100097f2e9
	false	undefined	0							undefined	0	58e382745ba4cb100097f3a6		false	101775	209	112	0	0	0	0	1	undefined	58e3820e5ba4cb100097f2e9
	false	undefined	0							undefined	0	58e382745ba4cb100097f3a7		false	102372	210	112	0	0	0	0	1	undefined	58e3820e5ba4cb100097f2e9
	false	undefined	0							undefined	0	58e382755ba4cb100097f3a8		false	102833	211	110	0	0	0	0	1	undefined	58e3820e5ba4cb100097f2e9
	false	undefined	0							undefined	0	58e382755ba4cb100097f3a9		false	103427	212	111	0	0	0	0	1	undefined	58e3820e5ba4cb100097f2e9
	false	undefined	0							undefined	0	58e382765ba4cb100097f3aa		false	103970	213	109	0	0	0	0	1	undefined	58e3820e5ba4cb100097f2e9
	false	undefined	0							undefined	0	58e382775ba4cb100097f3ab		false	104500	214	110	0	0	0	0	1	undefined	58e3820e5ba4cb100097f2e9
	false	undefined	0							undefined	0	58e382775ba4cb100097f3ac		false	104957	215	110	0	0	0	0	1	undefined	58e3820e5ba4cb100097f2e9
	false	undefined	0							undefined	0	58e382785ba4cb100097f3ad		false	105510	216	108	0	0	0	0	1	undefined	58e3820e5ba4cb100097f2e9
	false	undefined	0							undefined	0	58e382785ba4cb100097f3ae		false	105973	217	108	0	0	0	0	1	undefined	58e3820e5ba4cb100097f2e9
	false	undefined	0							undefined	0	58e382795ba4cb100097f3af		false	106646	218	108	0	0	0	0	1	undefined	58e3820e5ba4cb100097f2e9
	false	undefined	0							undefined	0	58e382795ba4cb100097f3b0		false	107126	219	108	0	0	0	0	1	undefined	58e3820e5ba4cb100097f2e9
	false	undefined	0							undefined	0	58e3827a5ba4cb100097f3b1		false	107643	220	108	0	0	0	0	1	undefined	58e3820e5ba4cb100097f2e9
	false	undefined	0							undefined	0	58e3827a5ba4cb100097f3b2		false	108249	221	108	0	0	0	0	1	undefined	58e3820e5ba4cb100097f2e9
	false	undefined	0							undefined	0	58e3827b5ba4cb100097f3b3		false	108799	222	109	0	0	0	0	1	undefined	58e3820e5ba4cb100097f2e9
	false	undefined	0							undefined	0	58e3827b5ba4cb100097f3b4		false	109316	223	112	0	0	0	0	1	undefined	58e3820e5ba4cb100097f2e9
	false	undefined	0							undefined	0	58e3827c5ba4cb100097f3b5		false	109859	224	113	0	0	0	0	1	undefined	58e3820e5ba4cb100097f2e9
	false	undefined	0							undefined	0	58e3827c5ba4cb100097f3b6		false	110390	225	112	0	0	0	0	1	undefined	58e3820e5ba4cb100097f2e9
	false	undefined	0							undefined	0	58e3827d5ba4cb100097f3b7		false	110920	226	110	0	0	0	0	1	undefined	58e3820e5ba4cb100097f2e9
	false	undefined	0							undefined	0	58e3827e5ba4cb100097f3b8		false	111450	227	112	0	0	0	0	1	undefined	58e3820e5ba4cb100097f2e9
	false	undefined	0							undefined	0	58e3827e5ba4cb100097f3b9		false	112001	228	111	0	0	0	0	1	undefined	58e3820e5ba4cb100097f2e9
	false	undefined	0							undefined	0	58e3827f5ba4cb100097f3ba		false	112511	229	112	0	0	0	0	1	undefined	58e3820e5ba4cb100097f2e9
	false	undefined	0							undefined	0	58e3827f5ba4cb100097f3bb		false	113010	230	112	0	0	0	0	1	undefined	58e3820e5ba4cb100097f2e9
	false	undefined	0							undefined	0	58e382805ba4cb100097f3bc		false	113592	231	110	0	0	0	0	1	undefined	58e3820e5ba4cb100097f2e9
	false	undefined	0							undefined	0	58e382805ba4cb100097f3bd		false	114131	232	110	0	0	0	0	1	undefined	58e3820e5ba4cb100097f2e9
	false	undefined	0							undefined	0	58e382815ba4cb100097f3be		false	114801	233	109	0	0	0	0	1	undefined	58e3820e5ba4cb100097f2e9
	false	undefined	0							undefined	0	58e382815ba4cb100097f3bf		false	115318	234	111	0	0	0	0	1	undefined	58e3820e5ba4cb100097f2e9
	false	undefined	0							undefined	0	58e382825ba4cb100097f3c0		false	115863	235	110	0	0	0	0	1	undefined	58e3820e5ba4cb100097f2e9
	false	undefined	0							undefined	0	58e382825ba4cb100097f3c1		false	116394	236	109	0	0	0	0	1	undefined	58e3820e5ba4cb100097f2e9
	false	undefined	0							undefined	0	58e382835ba4cb100097f3c2		false	116930	237	110	0	0	0	0	1	undefined	58e3820e5ba4cb100097f2e9
	false	undefined	0							undefined	0	58e382845ba4cb100097f3c3		false	117472	238	112	0	0	0	0	1	undefined	58e3820e5ba4cb100097f2e9
	false	undefined	0							undefined	0	58e382845ba4cb100097f3c4		false	117991	239	113	0	0	0	0	1	undefined	58e3820e5ba4cb100097f2e9
	false	undefined	0							undefined	0	58e382855ba4cb100097f3c5		false	118517	240	113	0	0	0	0	1	undefined	58e3820e5ba4cb100097f2e9
	false	undefined	0							undefined	0	58e382855ba4cb100097f3c6		false	119020	241	114	0	0	0	0	1	undefined	58e3820e5ba4cb100097f2e9
	false	undefined	0							undefined	0	58e382865ba4cb100097f3c7		false	119603	242	113	0	0	0	0	1	undefined	58e3820e5ba4cb100097f2e9
	false	undefined	0							undefined	0	58e382865ba4cb100097f3c8		false	120053	243	110	0	0	0	0	1	undefined	58e3820e5ba4cb100097f2e9
	false	undefined	0							undefined	0	58e382875ba4cb100097f3c9		false	120611	244	109	0	0	0	0	1	undefined	58e3820e5ba4cb100097f2e9
	false	undefined	0							undefined	0	58e382875ba4cb100097f3ca		false	121135	245	109	0	0	0	0	1	undefined	58e3820e5ba4cb100097f2e9
	false	undefined	0							undefined	0	58e382885ba4cb100097f3cb		false	121670	246	108	0	0	0	0	1	undefined	58e3820e5ba4cb100097f2e9
	false	undefined	0							undefined	0	58e382885ba4cb100097f3cc		false	122204	247	108	0	0	0	0	1	undefined	58e3820e5ba4cb100097f2e9
	false	undefined	0							undefined	0	58e382895ba4cb100097f3cd		false	122735	248	107	0	0	0	0	1	undefined	58e3820e5ba4cb100097f2e9
	false	undefined	0							undefined	0	58e382895ba4cb100097f3ce		false	123197	249	107	0	0	0	0	1	undefined	58e3820e5ba4cb100097f2e9
	false	undefined	0							undefined	0	58e3828a5ba4cb100097f3cf		false	123826	250	109	0	0	0	0	1	undefined	58e3820e5ba4cb100097f2e9
	false	undefined	0							undefined	0	58e3828a5ba4cb100097f3d0		false	124351	251	112	0	0	0	0	1	undefined	58e3820e5ba4cb100097f2e9
	false	undefined	0							undefined	0	58e3828b5ba4cb100097f3d1		false	124876	252	113	0	0	0	0	1	undefined	58e3820e5ba4cb100097f2e9
	false	undefined	0							undefined	0	58e3828b5ba4cb100097f3d2		false	125406	253	112	0	0	0	0	1	undefined	58e3820e5ba4cb100097f2e9
	false	undefined	0							undefined	0	58e3828c5ba4cb100097f3d3		false	125868	254	109	0	0	0	0	1	undefined	58e3820e5ba4cb100097f2e9
	false	undefined	0							undefined	0	58e3828d5ba4cb100097f3d4		false	126500	255	110	0	0	0	0	1	undefined	58e3820e5ba4cb100097f2e9
	false	undefined	0							undefined	0	58e3828d5ba4cb100097f3d5		false	127026	256	110	0	0	0	0	1	undefined	58e3820e5ba4cb100097f2e9
	false	undefined	0							undefined	0	58e3828e5ba4cb100097f3d6		false	127542	257	109	0	0	0	0	1	undefined	58e3820e5ba4cb100097f2e9
	false	undefined	0							undefined	0	58e3828e5ba4cb100097f3d7		false	128093	258	110	0	0	0	0	1	undefined	58e3820e5ba4cb100097f2e9
	false	undefined	0							undefined	0	58e3828f5ba4cb100097f3d8		false	128633	259	113	0	0	0	0	1	undefined	58e3820e5ba4cb100097f2e9
	false	undefined	0							undefined	0	58e3828f5ba4cb100097f3d9		false	129220	260	118	0	0	0	0	1	undefined	58e3820e5ba4cb100097f2e9
	false	undefined	0							undefined	0	58e382905ba4cb100097f3da		false	129677	261	115	0	0	0	0	1	undefined	58e3820e5ba4cb100097f2e9
	false	undefined	0							undefined	0	58e382905ba4cb100097f3db		false	130232	262	113	0	0	0	0	1	undefined	58e3820e5ba4cb100097f2e9
	false	undefined	0							undefined	0	58e382915ba4cb100097f3dc		false	130763	263	112	0	0	0	0	1	undefined	58e3820e5ba4cb100097f2e9
	false	undefined	0							undefined	0	58e382915ba4cb100097f3dd		false	131212	264	111	0	0	0	0	1	undefined	58e3820e5ba4cb100097f2e9
	false	undefined	0							undefined	0	58e382925ba4cb100097f3de		false	131764	265	111	0	0	0	0	1	undefined	58e3820e5ba4cb100097f2e9
	false	undefined	0							undefined	0	58e382925ba4cb100097f3df		false	132297	266	108	0	0	0	0	1	undefined	58e3820e5ba4cb100097f2e9
	false	undefined	0							undefined	0	58e382935ba4cb100097f3e0		false	132831	267	109	0	0	0	0	1	undefined	58e3820e5ba4cb100097f2e9
	false	undefined	0							undefined	0	58e382935ba4cb100097f3e1		false	133360	268	108	0	0	0	0	1	undefined	58e3820e5ba4cb100097f2e9
	false	undefined	0							undefined	0	58e382945ba4cb100097f3e2		false	133911	269	108	0	0	0	0	1	undefined	58e3820e5ba4cb100097f2e9
	false	undefined	0							undefined	0	58e382955ba4cb100097f3e3		false	134445	270	110	0	0	0	0	1	undefined	58e3820e5ba4cb100097f2e9
	false	undefined	0							undefined	0	58e382955ba4cb100097f3e4		false	134957	271	112	0	0	0	0	1	undefined	58e3820e5ba4cb100097f2e9
	false	undefined	0							undefined	0	58e382965ba4cb100097f3e5		false	135595	272	111	0	0	0	0	1	undefined	58e3820e5ba4cb100097f2e9
	false	undefined	0							undefined	0	58e382965ba4cb100097f3e6		false	136163	273	109	0	0	0	0	1	undefined	58e3820e5ba4cb100097f2e9
	false	undefined	0							undefined	0	58e382975ba4cb100097f3e7		false	136704	274	107	0	0	0	0	1	undefined	58e3820e5ba4cb100097f2e9
	false	undefined	0							undefined	0	58e382975ba4cb100097f3e8		false	137254	275	107	0	0	0	0	1	undefined	58e3820e5ba4cb100097f2e9
	false	undefined	0							undefined	0	58e382985ba4cb100097f3e9		false	137829	276	111	0	0	0	0	1	undefined	58e3820e5ba4cb100097f2e9
	false	undefined	0							undefined	0	58e382985ba4cb100097f3ea		false	138378	277	112	0	0	0	0	1	undefined	58e3820e5ba4cb100097f2e9
	false	undefined	0							undefined	0	58e382995ba4cb100097f3eb		false	138906	278	110	0	0	0	0	1	undefined	58e3820e5ba4cb100097f2e9
	false	undefined	0							undefined	0	58e3829a5ba4cb100097f3ec		false	139441	279	110	0	0	0	0	1	undefined	58e3820e5ba4cb100097f2e9
	false	undefined	0							undefined	0	58e3829a5ba4cb100097f3ed		false	139917	280	109	0	0	0	0	1	undefined	58e3820e5ba4cb100097f2e9
	false	undefined	0							undefined	0	58e3829b5ba4cb100097f3ee		false	140520	281	110	0	0	0	0	1	undefined	58e3820e5ba4cb100097f2e9
	false	undefined	0							undefined	0	58e3829b5ba4cb100097f3ef		false	141037	282	110	0	0	0	0	1	undefined	58e3820e5ba4cb100097f2e9
	false	undefined	0							undefined	0	58e3829c5ba4cb100097f3f0		false	141576	283	109	0	0	0	0	1	undefined	58e3820e5ba4cb100097f2e9
	false	undefined	0							undefined	0	58e3829c5ba4cb100097f3f1		false	142178	284	109	0	0	0	0	1	undefined	58e3820e5ba4cb100097f2e9
	false	undefined	0							undefined	0	58e3829d5ba4cb100097f3f2		false	142704	285	110	0	0	0	0	1	undefined	58e3820e5ba4cb100097f2e9
	false	undefined	0							undefined	0	58e3829d5ba4cb100097f3f3		true	143229	286	106	0	0	0	0	1	undefined	58e3820e5ba4cb100097f2e9
	false	undefined	0							undefined	0	58e3829e5ba4cb100097f3f4		true	143798	287	93	0	0	0	0	1	undefined	58e3820e5ba4cb100097f2e9
	false	undefined	0							undefined	0	58e3829e5ba4cb100097f3f5		true	144315	288	77	0	0	0	0	1	undefined	58e3820e5ba4cb100097f2e9
	false	undefined	0							undefined	0	58e3829f5ba4cb100097f3f6		true	144789	289	-1	0	0	0	0	1	undefined	58e3820e5ba4cb100097f2e9
	false	undefined	0							undefined	0	58e3829f5ba4cb100097f3f7		true	145320	290	-1	0	0	0	0	1	undefined	58e3820e5ba4cb100097f2e9
	false	undefined	0							undefined	0	58e382a05ba4cb100097f3f8		true	145839	291	-1	0	0	0	0	1	undefined	58e3820e5ba4cb100097f2e9
	false	undefined	0							undefined	0	58e382a05ba4cb100097f3f9		true	146401	292	-1	0	0	0	0	1	undefined	58e3820e5ba4cb100097f2e9
	false	undefined	0							undefined	0	58e382a15ba4cb100097f3fa		true	146949	293	-1	0	0	0	0	1	undefined	58e3820e5ba4cb100097f2e9
	false	undefined	0							undefined	0	58e382a25ba4cb100097f3fb		true	147457	294	-1	0	0	0	0	1	undefined	58e3820e5ba4cb100097f2e9
	false	undefined	0							undefined	0	58e382a25ba4cb100097f3fc		true	147996	295	-1	0	0	0	0	1	undefined	58e3820e5ba4cb100097f2e9
	false	undefined	0							undefined	0	58e382a35ba4cb100097f3fd		true	148523	296	-1	0	0	0	0	1	undefined	58e3820e5ba4cb100097f2e9
	false	undefined	0							undefined	0	58e382a35ba4cb100097f3fe		true	149147	297	-1	0	0	0	0	1	undefined	58e3820e5ba4cb100097f2e9
	false	undefined	0							undefined	0	58e382a45ba4cb100097f3ff		true	149744	298	-1	0	0	0	0	1	undefined	58e3820e5ba4cb100097f2e9
	false	undefined	0							undefined	0	58e382a45ba4cb100097f400		false	150347	299	-1	0	0	0	0	1	undefined	58e3820e5ba4cb100097f2e9
	false	undefined	0							undefined	0	58e382a55ba4cb100097f401		true	150870	300	-1	0	0	0	0	1	undefined	58e3820e5ba4cb100097f2e9
	false	undefined	0							undefined	0	58e382a55ba4cb100097f402		true	151400	301	-1	0	0	0	0	1	undefined	58e3820e5ba4cb100097f2e9
	false	undefined	0							undefined	0	58e382a65ba4cb100097f403		true	151930	302	-1	0	0	0	0	1	undefined	58e3820e5ba4cb100097f2e9
	false	undefined	0							undefined	0	58e382a75ba4cb100097f404		true	152469	303	-1	0	0	0	0	1	undefined	58e3820e5ba4cb100097f2e9
	false	undefined	0							undefined	0	58e382a75ba4cb100097f405		true	152994	304	-1	0	0	0	0	1	undefined	58e3820e5ba4cb100097f2e9
	false	undefined	0							undefined	0	58e382a85ba4cb100097f406		true	153551	305	-1	0	0	0	0	1	undefined	58e3820e5ba4cb100097f2e9
	false	undefined	0							undefined	0	58e382a85ba4cb100097f407		true	154015	306	-1	0	0	0	0	1	undefined	58e3820e5ba4cb100097f2e9
	false	undefined	0							undefined	0	58e382a95ba4cb100097f408		true	154609	307	-1	0	0	0	0	1	undefined	58e3820e5ba4cb100097f2e9
	false	undefined	0							undefined	0	58e382a95ba4cb100097f409		true	155123	308	-1	0	0	0	0	1	undefined	58e3820e5ba4cb100097f2e9
	false	undefined	0							undefined	0	58e382aa5ba4cb100097f40a		true	155810	309	-1	0	0	0	0	1	undefined	58e3820e5ba4cb100097f2e9
	false	undefined	0							undefined	0	58e382aa5ba4cb100097f40b		true	156274	310	-1	0	0	0	0	1	undefined	58e3820e5ba4cb100097f2e9
	false	undefined	0							undefined	0	58e382ab5ba4cb100097f40c		true	156816	311	-1	0	0	0	0	1	undefined	58e3820e5ba4cb100097f2e9
	false	undefined	0							undefined	0	58e382ac5ba4cb100097f40d		true	157478	312	-1	0	0	0	0	1	undefined	58e3820e5ba4cb100097f2e9
	false	undefined	0							undefined	0	58e382ac5ba4cb100097f40e		true	158004	313	-1	0	0	0	0	1	undefined	58e3820e5ba4cb100097f2e9
	false	undefined	0							undefined	0	58e382ad5ba4cb100097f40f		true	158549	314	-1	0	0	0	0	1	undefined	58e3820e5ba4cb100097f2e9
	false	undefined	0							undefined	0	58e382ad5ba4cb100097f410		true	159088	315	-1	0	0	0	0	1	undefined	58e3820e5ba4cb100097f2e9
	false	undefined	0							undefined	0	58e382ae5ba4cb100097f411		true	159562	316	-1	0	0	0	0	1	undefined	58e3820e5ba4cb100097f2e9
	false	undefined	0							undefined	0	58e382ae5ba4cb100097f412		true	160153	317	-1	0	0	0	0	1	undefined	58e3820e5ba4cb100097f2e9
	false	undefined	0							undefined	0	58e382af5ba4cb100097f413		true	160620	318	-1	0	0	0	0	1	undefined	58e3820e5ba4cb100097f2e9
	false	undefined	0							undefined	0	58e382af5ba4cb100097f414		true	161214	319	-1	0	0	0	0	1	undefined	58e3820e5ba4cb100097f2e9
	false	undefined	0							undefined	0	58e382b05ba4cb100097f415		true	161730	320	-1	0	0	0	0	1	undefined	58e3820e5ba4cb100097f2e9
	false	undefined	0							undefined	0	58e382b05ba4cb100097f416		true	162211	321	-1	0	0	0	0	1	undefined	58e3820e5ba4cb100097f2e9
	false	undefined	0							undefined	0	58e382b15ba4cb100097f417		false	162837	322	-1	0	0	0	0	1	undefined	58e3820e5ba4cb100097f2e9
	false	undefined	0							undefined	0	58e382b25ba4cb100097f418		true	163435	323	-1	0	0	0	0	1	undefined	58e3820e5ba4cb100097f2e9
	false	undefined	0							undefined	0	58e382b25ba4cb100097f419		true	164052	327	-1	0	0	0	0	1	undefined	58e3820e5ba4cb100097f2e9
	false	undefined	0							undefined	0	58e382b35ba4cb100097f41a		false	164666	328	-1	0	0	0	0	1	undefined	58e3820e5ba4cb100097f2e9
	false	undefined	0							undefined	0	58e382b35ba4cb100097f41b		false	165152	329	-1	0	0	0	0	1	undefined	58e3820e5ba4cb100097f2e9
	false	undefined	0							undefined	0	58e382b45ba4cb100097f41c		false	165656	330	-1	0	0	0	0	1	undefined	58e3820e5ba4cb100097f2e9
	false	undefined	0							undefined	0	58e382b45ba4cb100097f41d		true	166231	331	-1	0	0	0	0	1	undefined	58e3820e5ba4cb100097f2e9
	false	undefined	0							undefined	0	58e382b55ba4cb100097f41e		true	166838	332	-1	0	0	0	0	1	undefined	58e3820e5ba4cb100097f2e9
	false	undefined	0							undefined	0	58e382b55ba4cb100097f41f		false	167436	333	112	0	0	0	0	1	undefined	58e3820e5ba4cb100097f2e9
	false	undefined	0							undefined	0	58e382b65ba4cb100097f420		false	167941	334	113	0	0	0	0	1	undefined	58e3820e5ba4cb100097f2e9
	false	undefined	0							undefined	0	58e382b75ba4cb100097f421		false	168510	335	111	0	0	0	0	1	undefined	58e3820e5ba4cb100097f2e9
	false	undefined	0							undefined	0	58e382b75ba4cb100097f422		false	169038	339	112	0	0	0	0	1	undefined	58e3820e5ba4cb100097f2e9
	false	undefined	0							undefined	0	58e382b85ba4cb100097f423		false	169702	340	112	0	0	0	0	1	undefined	58e3820e5ba4cb100097f2e9
	false	undefined	0							undefined	0	58e382b85ba4cb100097f424		false	170244	341	114	0	0	0	0	1	undefined	58e3820e5ba4cb100097f2e9
	false	undefined	0							undefined	0	58e382b95ba4cb100097f425		false	170757	342	116	0	0	0	0	1	undefined	58e3820e5ba4cb100097f2e9
	false	undefined	0							undefined	0	58e382b95ba4cb100097f426		false	171260	343	116	0	0	0	0	1	undefined	58e3820e5ba4cb100097f2e9
	false	undefined	0							undefined	0	58e382ba5ba4cb100097f427		false	171827	344	115	0	0	0	0	1	undefined	58e3820e5ba4cb100097f2e9
	false	undefined	0							undefined	0	58e382ba5ba4cb100097f428		false	172374	345	116	0	0	0	0	1	undefined	58e3820e5ba4cb100097f2e9
	false	undefined	0							undefined	0	58e382bb5ba4cb100097f429		false	172907	346	116	0	0	0	0	1	undefined	58e3820e5ba4cb100097f2e9
	false	undefined	0							undefined	0	58e382bc5ba4cb100097f42a		false	173526	347	115	0	0	0	0	1	undefined	58e3820e5ba4cb100097f2e9
	false	undefined	0							undefined	0	58e382bc5ba4cb100097f42b		false	174123	348	116	0	0	0	0	1	undefined	58e3820e5ba4cb100097f2e9
	false	undefined	0							undefined	0	58e382bd5ba4cb100097f42c		false	174568	349	114	0	0	0	0	1	undefined	58e3820e5ba4cb100097f2e9
	false	undefined	0							undefined	0	58e382bd5ba4cb100097f42d		false	175099	350	116	0	0	0	0	1	undefined	58e3820e5ba4cb100097f2e9
	false	undefined	0							undefined	0	58e382be5ba4cb100097f42e		false	175649	351	116	0	0	0	0	1	undefined	58e3820e5ba4cb100097f2e9
	false	undefined	0							undefined	0	58e382be5ba4cb100097f42f		false	176180	352	116	0	0	0	0	1	undefined	58e3820e5ba4cb100097f2e9
	false	undefined	0							undefined	0	58e382bf5ba4cb100097f430		false	176647	353	115	0	0	0	0	1	undefined	58e3820e5ba4cb100097f2e9
	false	undefined	0							undefined	0	58e382bf5ba4cb100097f431		false	177270	354	112	0	0	0	0	1	undefined	58e3820e5ba4cb100097f2e9
	false	undefined	0							undefined	0	58e382c05ba4cb100097f432		false	177856	355	115	0	0	0	0	1	undefined	58e3820e5ba4cb100097f2e9
	false	undefined	0							undefined	0	58e382c05ba4cb100097f433		false	178314	356	113	0	0	0	0	1	undefined	58e3820e5ba4cb100097f2e9
	false	undefined	0							undefined	0	58e382c15ba4cb100097f434		false	178949	357	112	0	0	0	0	1	undefined	58e3820e5ba4cb100097f2e9
	false	undefined	0							undefined	0	58e382c25ba4cb100097f435		false	179439	358	112	0	0	0	0	1	undefined	58e3820e5ba4cb100097f2e9
	false	undefined	0							undefined	0	58e382c25ba4cb100097f436		false	179975	359	113	0	0	0	0	1	undefined	58e3820e5ba4cb100097f2e9
	false	undefined	0							undefined	0	58e382c35ba4cb100097f437		false	180530	360	113	0	0	0	0	1	undefined	58e3820e5ba4cb100097f2e9
	false	undefined	0							undefined	0	58e382c35ba4cb100097f438		false	181061	361	112	0	0	0	0	1	undefined	58e3820e5ba4cb100097f2e9
	false	undefined	0							undefined	0	58e382c45ba4cb100097f439		false	181588	362	115	0	0	0	0	1	undefined	58e3820e5ba4cb100097f2e9
	false	undefined	0							undefined	0	58e382c45ba4cb100097f43a		false	182131	363	116	0	0	0	0	1	undefined	58e3820e5ba4cb100097f2e9
	false	undefined	0							undefined	0	58e382c55ba4cb100097f43b		false	182731	364	113	0	0	0	0	1	undefined	58e3820e5ba4cb100097f2e9
	false	undefined	0							undefined	0	58e382c55ba4cb100097f43c		false	183237	365	113	0	0	0	0	1	undefined	58e3820e5ba4cb100097f2e9
	false	undefined	0							undefined	0	58e382c65ba4cb100097f43d		false	183765	366	115	0	0	0	0	1	undefined	58e3820e5ba4cb100097f2e9
	false	undefined	0							undefined	0	58e382c65ba4cb100097f43e		false	184320	367	117	0	0	0	0	1	undefined	58e3820e5ba4cb100097f2e9
	false	undefined	0							undefined	0	58e382c75ba4cb100097f43f		false	184846	368	114	0	0	0	0	1	undefined	58e3820e5ba4cb100097f2e9
	false	undefined	0							undefined	0	58e382c75ba4cb100097f440		false	185354	369	113	0	0	0	0	1	undefined	58e3820e5ba4cb100097f2e9
	false	undefined	0							undefined	0	58e382c85ba4cb100097f441		false	185930	370	112	0	0	0	0	1	undefined	58e3820e5ba4cb100097f2e9
	false	undefined	0							undefined	0	58e382c95ba4cb100097f442		false	186464	371	111	0	0	0	0	1	undefined	58e3820e5ba4cb100097f2e9
	false	undefined	0							undefined	0	58e382c95ba4cb100097f443		false	187068	372	113	0	0	0	0	1	undefined	58e3820e5ba4cb100097f2e9
	false	undefined	0							undefined	0	58e382ca5ba4cb100097f444		false	187605	373	113	0	0	0	0	1	undefined	58e3820e5ba4cb100097f2e9
	false	undefined	0							undefined	0	58e382ca5ba4cb100097f445		false	188220	374	116	0	0	0	0	1	undefined	58e3820e5ba4cb100097f2e9
	false	undefined	0							undefined	0	58e382cb5ba4cb100097f446		false	188659	375	112	0	0	0	0	1	undefined	58e3820e5ba4cb100097f2e9
	false	undefined	0							undefined	0	58e382cb5ba4cb100097f447		false	189219	376	113	0	0	0	0	1	undefined	58e3820e5ba4cb100097f2e9
	false	undefined	0							undefined	0	58e382cc5ba4cb100097f448		false	189751	377	114	0	0	0	0	1	undefined	58e3820e5ba4cb100097f2e9
	false	undefined	0							undefined	0	58e382cc5ba4cb100097f449		false	190349	378	113	0	0	0	0	1	undefined	58e3820e5ba4cb100097f2e9
	false	undefined	0							undefined	0	58e382cd5ba4cb100097f44a		false	190886	379	114	0	0	0	0	1	undefined	58e3820e5ba4cb100097f2e9
	false	undefined	0							undefined	0	58e382cd5ba4cb100097f44b		false	191431	380	112	0	0	0	0	1	undefined	58e3820e5ba4cb100097f2e9
	false	undefined	0							undefined	0	58e382ce5ba4cb100097f44c		false	191944	381	113	0	0	0	0	1	undefined	58e3820e5ba4cb100097f2e9
	false	undefined	0							undefined	0	58e382cf5ba4cb100097f44d		false	192470	382	112	0	0	0	0	1	undefined	58e3820e5ba4cb100097f2e9
	false	undefined	0							undefined	0	58e382cf5ba4cb100097f44e		false	193095	383	110	0	0	0	0	1	undefined	58e3820e5ba4cb100097f2e9
	false	undefined	0							undefined	0	58e382d05ba4cb100097f44f		false	193610	384	109	0	0	0	0	1	undefined	58e3820e5ba4cb100097f2e9
	false	undefined	0							undefined	0	58e382d05ba4cb100097f450		false	194151	385	110	0	0	0	0	1	undefined	58e3820e5ba4cb100097f2e9
	false	undefined	0							undefined	0	58e382d15ba4cb100097f451		false	194634	386	109	0	0	0	0	1	undefined	58e3820e5ba4cb100097f2e9
	false	undefined	0							undefined	0	58e382d15ba4cb100097f452		false	195208	387	110	0	0	0	0	1	undefined	58e3820e5ba4cb100097f2e9
	false	undefined	0							undefined	0	58e382d25ba4cb100097f453		false	195756	388	111	0	0	0	0	1	undefined	58e3820e5ba4cb100097f2e9
	false	undefined	0							undefined	0	58e382d25ba4cb100097f454		false	196312	389	113	0	0	0	0	1	undefined	58e3820e5ba4cb100097f2e9
	false	undefined	0							undefined	0	58e382d35ba4cb100097f455		false	196827	390	110	0	0	0	0	1	undefined	58e3820e5ba4cb100097f2e9
	false	undefined	0							undefined	0	58e382d35ba4cb100097f456		false	197369	391	108	0	0	0	0	1	undefined	58e3820e5ba4cb100097f2e9
	false	undefined	0							undefined	0	58e382d45ba4cb100097f457		false	197894	392	107	0	0	0	0	1	undefined	58e3820e5ba4cb100097f2e9
	false	undefined	0							undefined	0	58e382d45ba4cb100097f458		false	198426	393	109	0	0	0	0	1	undefined	58e3820e5ba4cb100097f2e9
	false	undefined	0							undefined	0	58e382d55ba4cb100097f459		false	198968	394	111	0	0	0	0	1	undefined	58e3820e5ba4cb100097f2e9
	false	undefined	0							undefined	0	58e382d65ba4cb100097f45a		false	199500	395	112	0	0	0	0	1	undefined	58e3820e5ba4cb100097f2e9
	false	undefined	0							undefined	0	58e382d65ba4cb100097f45b		false	200025	396	114	0	0	0	0	1	undefined	58e3820e5ba4cb100097f2e9
	false	undefined	0							undefined	0	58e382d75ba4cb100097f45c		false	200480	397	113	0	0	0	0	1	undefined	58e3820e5ba4cb100097f2e9
	false	undefined	0							undefined	0	58e382d75ba4cb100097f45d		false	201027	398	112	0	0	0	0	1	undefined	58e3820e5ba4cb100097f2e9
	false	undefined	0							undefined	0	58e382d85ba4cb100097f45e		false	201536	399	111	0	0	0	0	1	undefined	58e3820e5ba4cb100097f2e9
	false	undefined	0							undefined	0	58e382d85ba4cb100097f45f		false	202103	400	109	0	0	0	0	1	undefined	58e3820e5ba4cb100097f2e9
	false	undefined	0							undefined	0	58e382d95ba4cb100097f460		false	202639	401	109	0	0	0	0	1	undefined	58e3820e5ba4cb100097f2e9
	false	undefined	0							undefined	0	58e382d95ba4cb100097f461		false	203233	402	112	0	0	0	0	1	undefined	58e3820e5ba4cb100097f2e9
	false	undefined	0							undefined	0	58e382da5ba4cb100097f462		false	203673	403	112	0	0	0	0	1	undefined	58e3820e5ba4cb100097f2e9
	false	undefined	0							undefined	0	58e382da5ba4cb100097f463		false	204235	404	111	0	0	0	0	1	undefined	58e3820e5ba4cb100097f2e9
	false	undefined	0							undefined	0	58e382db5ba4cb100097f464		false	204780	405	110	0	0	0	0	1	undefined	58e3820e5ba4cb100097f2e9
	false	undefined	0							undefined	0	58e382db5ba4cb100097f465		false	205304	406	110	0	0	0	0	1	undefined	58e3820e5ba4cb100097f2e9
	false	undefined	0							undefined	0	58e382dc5ba4cb100097f466		false	205842	407	110	0	0	0	0	1	undefined	58e3820e5ba4cb100097f2e9
	false	undefined	0							undefined	0	58e382dc5ba4cb100097f467		false	206434	408	109	0	0	0	0	1	undefined	58e3820e5ba4cb100097f2e9
	false	undefined	0							undefined	0	58e382dd5ba4cb100097f468		false	206969	409	111	0	0	0	0	1	undefined	58e3820e5ba4cb100097f2e9
	false	undefined	0							undefined	0	58e382de5ba4cb100097f469		false	207523	410	113	0	0	0	0	1	undefined	58e3820e5ba4cb100097f2e9
	false	undefined	0							undefined	0	58e382de5ba4cb100097f46a		false	208056	411	113	0	0	0	0	1	undefined	58e3820e5ba4cb100097f2e9
	false	undefined	0							undefined	0	58e382df5ba4cb100097f46b		false	208582	412	110	0	0	0	0	1	undefined	58e3820e5ba4cb100097f2e9
	false	undefined	0							undefined	0	58e382df5ba4cb100097f46c		false	209078	413	113	0	0	0	0	1	undefined	58e3820e5ba4cb100097f2e9
	false	undefined	0							undefined	0	58e382e05ba4cb100097f46d		false	209656	414	112	0	0	0	0	1	undefined	58e3820e5ba4cb100097f2e9
	false	undefined	0							undefined	0	58e382e05ba4cb100097f46e		false	210242	415	114	0	0	0	0	1	undefined	58e3820e5ba4cb100097f2e9
	false	undefined	0							undefined	0	58e382e15ba4cb100097f46f		false	210716	416	111	0	0	0	0	1	undefined	58e3820e5ba4cb100097f2e9
	false	undefined	0							undefined	0	58e382e15ba4cb100097f470		false	211261	417	110	0	0	0	0	1	undefined	58e3820e5ba4cb100097f2e9
	false	undefined	0							undefined	0	58e382e25ba4cb100097f471		false	211780	418	112	0	0	0	0	1	undefined	58e3820e5ba4cb100097f2e9
	false	undefined	0							undefined	0	58e382e25ba4cb100097f472		false	212322	419	112	0	0	0	0	1	undefined	58e3820e5ba4cb100097f2e9
	false	undefined	0							undefined	0	58e382e35ba4cb100097f473		false	212844	420	114	0	0	0	0	1	undefined	58e3820e5ba4cb100097f2e9
	false	undefined	0							undefined	0	58e382e35ba4cb100097f474		false	213380	421	111	0	0	0	0	1	undefined	58e3820e5ba4cb100097f2e9
	false	undefined	0							undefined	0	58e382e45ba4cb100097f475		false	213931	422	111	0	0	0	0	1	undefined	58e3820e5ba4cb100097f2e9
	false	undefined	0							undefined	0	58e382e55ba4cb100097f476		false	214455	423	113	0	0	0	0	1	undefined	58e3820e5ba4cb100097f2e9
	false	undefined	0							undefined	0	58e382e55ba4cb100097f477		false	214976	424	113	0	0	0	0	1	undefined	58e3820e5ba4cb100097f2e9
	false	undefined	0							undefined	0	58e382e65ba4cb100097f478		false	215524	425	112	0	0	0	0	1	undefined	58e3820e5ba4cb100097f2e9
	false	undefined	0							undefined	0	58e382e65ba4cb100097f479		false	216060	426	108	0	0	0	0	1	undefined	58e3820e5ba4cb100097f2e9
	false	undefined	0							undefined	0	58e382e75ba4cb100097f47a		false	216592	427	108	0	0	0	0	1	undefined	58e3820e5ba4cb100097f2e9
	false	undefined	0							undefined	0	58e382e75ba4cb100097f47b		false	217072	428	108	0	0	0	0	1	undefined	58e3820e5ba4cb100097f2e9
	false	undefined	0							undefined	0	58e382e85ba4cb100097f47c		false	217609	429	106	0	0	0	0	1	undefined	58e3820e5ba4cb100097f2e9
	false	undefined	0							undefined	0	58e382e85ba4cb100097f47d		false	218133	430	108	0	0	0	0	1	undefined	58e3820e5ba4cb100097f2e9
	false	undefined	0							undefined	0	58e382e95ba4cb100097f47e		false	218656	431	110	0	0	0	0	1	undefined	58e3820e5ba4cb100097f2e9
	false	undefined	0							undefined	0	58e382e95ba4cb100097f47f		false	219196	432	112	0	0	0	0	1	undefined	58e3820e5ba4cb100097f2e9
	false	undefined	0							undefined	0	58e382ea5ba4cb100097f480		false	219666	433	110	0	0	0	0	1	undefined	58e3820e5ba4cb100097f2e9
	false	undefined	0							undefined	0	58e382ea5ba4cb100097f481		false	220215	434	112	0	0	0	0	1	undefined	58e3820e5ba4cb100097f2e9
	false	undefined	0							undefined	0	58e382eb5ba4cb100097f482		false	220743	435	113	0	0	0	0	1	undefined	58e3820e5ba4cb100097f2e9
	false	undefined	0							undefined	0	58e382eb5ba4cb100097f483		false	221278	436	112	0	0	0	0	1	undefined	58e3820e5ba4cb100097f2e9
	false	undefined	0							undefined	0	58e382ec5ba4cb100097f484		false	221889	437	111	0	0	0	0	1	undefined	58e3820e5ba4cb100097f2e9
	false	undefined	0							undefined	0	58e382ed5ba4cb100097f485		false	222419	438	110	0	0	0	0	1	undefined	58e3820e5ba4cb100097f2e9
	false	undefined	0							undefined	0	58e382ed5ba4cb100097f486		false	223014	439	113	0	0	0	0	1	undefined	58e3820e5ba4cb100097f2e9
	false	undefined	0							undefined	0	58e382ee5ba4cb100097f487		false	223483	440	112	0	0	0	0	1	undefined	58e3820e5ba4cb100097f2e9
	false	undefined	0							undefined	0	58e382ee5ba4cb100097f488		false	224093	441	112	0	0	0	0	1	undefined	58e3820e5ba4cb100097f2e9
	false	undefined	0							undefined	0	58e382ef5ba4cb100097f489		false	224616	442	112	0	0	0	0	1	undefined	58e3820e5ba4cb100097f2e9
	false	undefined	0							undefined	0	58e382ef5ba4cb100097f48a		false	225154	443	112	0	0	0	0	1	undefined	58e3820e5ba4cb100097f2e9
	false	undefined	0							undefined	0	58e382f05ba4cb100097f48b		false	225687	444	112	0	0	0	0	1	undefined	58e3820e5ba4cb100097f2e9
	false	undefined	0							undefined	0	58e382f05ba4cb100097f48c		false	226305	445	110	0	0	0	0	1	undefined	58e3820e5ba4cb100097f2e9
	false	undefined	0							undefined	0	58e382f15ba4cb100097f48d		false	226889	446	113	0	0	0	0	1	undefined	58e3820e5ba4cb100097f2e9
	false	undefined	0							undefined	0	58e382f15ba4cb100097f48e		false	227419	447	112	0	0	0	0	1	undefined	58e3820e5ba4cb100097f2e9
	false	undefined	0							undefined	0	58e382f25ba4cb100097f48f		false	228020	448	115	0	0	0	0	1	undefined	58e3820e5ba4cb100097f2e9
	false	undefined	0							undefined	0	58e382f35ba4cb100097f490		false	228441	449	113	0	0	0	0	1	undefined	58e3820e5ba4cb100097f2e9
	false	undefined	0							undefined	0	58e382f35ba4cb100097f491		false	229011	450	113	0	0	0	0	1	undefined	58e3820e5ba4cb100097f2e9
	false	undefined	0							undefined	0	58e382f45ba4cb100097f492		false	229562	451	110	0	0	0	0	1	undefined	58e3820e5ba4cb100097f2e9
	false	undefined	0							undefined	0	58e382f45ba4cb100097f493		false	230094	452	111	0	0	0	0	1	undefined	58e3820e5ba4cb100097f2e9
	false	undefined	0							undefined	0	58e382f55ba4cb100097f494		false	230554	453	114	0	0	0	0	1	undefined	58e3820e5ba4cb100097f2e9
	false	undefined	0							undefined	0	58e382f55ba4cb100097f495		false	231077	454	113	0	0	0	0	1	undefined	58e3820e5ba4cb100097f2e9
	false	undefined	0							undefined	0	58e382f65ba4cb100097f496		false	231617	455	113	0	0	0	0	1	undefined	58e3820e5ba4cb100097f2e9
	false	undefined	0							undefined	0	58e382f65ba4cb100097f497		false	232102	456	108	0	0	0	0	1	undefined	58e3820e5ba4cb100097f2e9
	false	undefined	0							undefined	0	58e382f75ba4cb100097f498		false	232634	457	110	0	0	0	0	1	undefined	58e3820e5ba4cb100097f2e9
	false	undefined	0							undefined	0	58e382f75ba4cb100097f499		false	233111	458	111	0	0	0	0	1	undefined	58e3820e5ba4cb100097f2e9
	false	undefined	0							undefined	0	58e382f85ba4cb100097f49a		false	233696	459	110	0	0	0	0	1	undefined	58e3820e5ba4cb100097f2e9
	false	undefined	0							undefined	0	58e382f85ba4cb100097f49b		false	234185	460	109	0	0	0	0	1	undefined	58e3820e5ba4cb100097f2e9
	false	undefined	0							undefined	0	58e382f95ba4cb100097f49c		false	234777	461	107	0	0	0	0	1	undefined	58e3820e5ba4cb100097f2e9
	false	undefined	0							undefined	0	58e382f95ba4cb100097f49d		false	235310	462	112	0	0	0	0	1	undefined	58e3820e5ba4cb100097f2e9
	false	undefined	0							undefined	0	58e382fa5ba4cb100097f49e		false	235841	463	113	0	0	0	0	1	undefined	58e3820e5ba4cb100097f2e9
	false	undefined	0							undefined	0	58e382fa5ba4cb100097f49f		false	236372	464	114	0	0	0	0	1	undefined	58e3820e5ba4cb100097f2e9
	false	undefined	0							undefined	0	58e382fb5ba4cb100097f4a0		false	236902	465	116	0	0	0	0	1	undefined	58e3820e5ba4cb100097f2e9
	false	undefined	0							undefined	0	58e382fc5ba4cb100097f4a1		false	237434	466	115	0	0	0	0	1	undefined	58e3820e5ba4cb100097f2e9
	false	undefined	0							undefined	0	58e382fc5ba4cb100097f4a2		false	237986	467	118	0	0	0	0	1	undefined	58e3820e5ba4cb100097f2e9
	false	undefined	0							undefined	0	58e382fd5ba4cb100097f4a3		false	238516	468	114	0	0	0	0	1	undefined	58e3820e5ba4cb100097f2e9
	false	undefined	0							undefined	0	58e382fd5ba4cb100097f4a4		false	239038	469	111	0	0	0	0	1	undefined	58e3820e5ba4cb100097f2e9
	false	undefined	0							undefined	0	58e382fe5ba4cb100097f4a5		false	239567	470	110	0	0	0	0	1	undefined	58e3820e5ba4cb100097f2e9
	false	undefined	0							undefined	0	58e382fe5ba4cb100097f4a6		false	240109	471	110	0	0	0	0	1	undefined	58e3820e5ba4cb100097f2e9
	false	undefined	0							undefined	0	58e382ff5ba4cb100097f4a7		false	240624	472	113	0	0	0	0	1	undefined	58e3820e5ba4cb100097f2e9
	false	undefined	0							undefined	0	58e382ff5ba4cb100097f4a8		false	241126	473	110	0	0	0	0	1	undefined	58e3820e5ba4cb100097f2e9
	false	undefined	0							undefined	0	58e383005ba4cb100097f4a9		false	241722	474	112	0	0	0	0	1	undefined	58e3820e5ba4cb100097f2e9
	false	undefined	0							undefined	0	58e383005ba4cb100097f4aa		false	242251	475	111	0	0	0	0	1	undefined	58e3820e5ba4cb100097f2e9
	false	undefined	0							undefined	0	58e383015ba4cb100097f4ab		false	242850	476	112	0	0	0	0	1	undefined	58e3820e5ba4cb100097f2e9
	false	undefined	0							undefined	0	58e383015ba4cb100097f4ac		false	243313	477	110	0	0	0	0	1	undefined	58e3820e5ba4cb100097f2e9
	false	undefined	0							undefined	0	58e383025ba4cb100097f4ad		false	243867	478	108	0	0	0	0	1	undefined	58e3820e5ba4cb100097f2e9
	false	undefined	0							undefined	0	58e383035ba4cb100097f4ae		false	244457	479	113	0	0	0	0	1	undefined	58e3820e5ba4cb100097f2e9
	false	undefined	0							undefined	0	58e383035ba4cb100097f4af		false	244983	480	113	0	0	0	0	1	undefined	58e3820e5ba4cb100097f2e9
	false	undefined	0							undefined	0	58e383045ba4cb100097f4b0		false	245523	481	115	0	0	0	0	1	undefined	58e3820e5ba4cb100097f2e9
	false	undefined	0							undefined	0	58e383045ba4cb100097f4b1		false	245976	482	112	0	0	0	0	1	undefined	58e3820e5ba4cb100097f2e9
	false	undefined	0							undefined	0	58e383055ba4cb100097f4b2		false	246527	483	114	0	0	0	0	1	undefined	58e3820e5ba4cb100097f2e9
	false	undefined	0							undefined	0	58e383055ba4cb100097f4b3		false	247044	484	115	0	0	0	0	1	undefined	58e3820e5ba4cb100097f2e9
	false	undefined	0							undefined	0	58e383065ba4cb100097f4b4		false	247589	485	113	0	0	0	0	1	undefined	58e3820e5ba4cb100097f2e9
	false	undefined	0							undefined	0	58e383065ba4cb100097f4b5		false	248189	486	113	0	0	0	0	1	undefined	58e3820e5ba4cb100097f2e9
	false	undefined	0							undefined	0	58e383075ba4cb100097f4b6		false	248729	487	114	0	0	0	0	1	undefined	58e3820e5ba4cb100097f2e9
	false	undefined	0							undefined	0	58e383075ba4cb100097f4b7		false	249263	488	116	0	0	0	0	1	undefined	58e3820e5ba4cb100097f2e9
	false	undefined	0							undefined	0	58e383085ba4cb100097f4b8		false	249785	489	113	0	0	0	0	1	undefined	58e3820e5ba4cb100097f2e9
	false	undefined	0							undefined	0	58e383085ba4cb100097f4b9		false	250343	490	114	0	0	0	0	1	undefined	58e3820e5ba4cb100097f2e9
	false	undefined	0							undefined	0	58e383095ba4cb100097f4ba		false	250870	491	117	0	0	0	0	1	undefined	58e3820e5ba4cb100097f2e9
	false	undefined	0							undefined	0	58e383095ba4cb100097f4bb		false	251394	492	114	0	0	0	0	1	undefined	58e3820e5ba4cb100097f2e9
	false	undefined	0							undefined	0	58e3830a5ba4cb100097f4bc		false	251920	493	113	0	0	0	0	1	undefined	58e3820e5ba4cb100097f2e9
	false	undefined	0							undefined	0	58e3830a5ba4cb100097f4bd		false	252399	494	111	0	0	0	0	1	undefined	58e3820e5ba4cb100097f2e9
	false	undefined	0							undefined	0	58e3830b5ba4cb100097f4be		false	253021	495	112	0	0	0	0	1	undefined	58e3820e5ba4cb100097f2e9
	false	undefined	0							undefined	0	58e3830c5ba4cb100097f4bf		false	253548	496	112	0	0	0	0	1	undefined	58e3820e5ba4cb100097f2e9
	false	undefined	0							undefined	0	58e3830c5ba4cb100097f4c0		false	254068	497	111	0	0	0	0	1	undefined	58e3820e5ba4cb100097f2e9
	false	undefined	0							undefined	0	58e3830d5ba4cb100097f4c1		false	254603	498	112	0	0	0	0	1	undefined	58e3820e5ba4cb100097f2e9
	false	undefined	0							undefined	0	58e3830d5ba4cb100097f4c2		false	255143	499	111	0	0	0	0	1	undefined	58e3820e5ba4cb100097f2e9
	false	undefined	0							undefined	0	58e3830e5ba4cb100097f4c3		false	255666	500	115	0	0	0	0	1	undefined	58e3820e5ba4cb100097f2e9
	false	undefined	0							undefined	0	58e3830e5ba4cb100097f4c4		false	256221	501	114	0	0	0	0	1	undefined	58e3820e5ba4cb100097f2e9
	false	undefined	0							undefined	0	58e3830f5ba4cb100097f4c5		false	256742	502	112	0	0	0	0	1	undefined	58e3820e5ba4cb100097f2e9
	false	undefined	0							undefined	0	58e3830f5ba4cb100097f4c6		false	257230	503	112	0	0	0	0	1	undefined	58e3820e5ba4cb100097f2e9
	false	undefined	0							undefined	0	58e383105ba4cb100097f4c7		false	257805	504	112	0	0	0	0	1	undefined	58e3820e5ba4cb100097f2e9
	false	undefined	0							undefined	0	58e383105ba4cb100097f4c8		false	258350	505	113	0	0	0	0	1	undefined	58e3820e5ba4cb100097f2e9
	false	undefined	0							undefined	0	58e383115ba4cb100097f4c9		false	258829	506	112	0	0	0	0	1	undefined	58e3820e5ba4cb100097f2e9
	false	undefined	0							undefined	0	58e383115ba4cb100097f4ca		false	259335	507	111	0	0	0	0	1	undefined	58e3820e5ba4cb100097f2e9
	false	undefined	0							undefined	0	58e383125ba4cb100097f4cb		false	259955	508	112	0	0	0	0	1	undefined	58e3820e5ba4cb100097f2e9
	false	undefined	0							undefined	0	58e383135ba4cb100097f4cc		false	260551	509	113	0	0	0	0	1	undefined	58e3820e5ba4cb100097f2e9
	false	undefined	0							undefined	0	58e383135ba4cb100097f4cd		false	261017	510	111	0	0	0	0	1	undefined	58e3820e5ba4cb100097f2e9
	false	undefined	0							undefined	0	58e383145ba4cb100097f4ce		false	261557	511	112	0	0	0	0	1	undefined	58e3820e5ba4cb100097f2e9
	false	undefined	0							undefined	0	58e383145ba4cb100097f4cf		false	262079	512	112	0	0	0	0	1	undefined	58e3820e5ba4cb100097f2e9
	false	undefined	0							undefined	0	58e383155ba4cb100097f4d0		false	262538	513	113	0	0	0	0	1	undefined	58e3820e5ba4cb100097f2e9
	false	undefined	0							undefined	0	58e383155ba4cb100097f4d1		false	263079	514	114	0	0	0	0	1	undefined	58e3820e5ba4cb100097f2e9
	false	undefined	0							undefined	0	58e383165ba4cb100097f4d2		false	263632	515	113	0	0	0	0	1	undefined	58e3820e5ba4cb100097f2e9
	false	undefined	0							undefined	0	58e383165ba4cb100097f4d3		false	264160	516	114	0	0	0	0	1	undefined	58e3820e5ba4cb100097f2e9
	false	undefined	0							undefined	0	58e383175ba4cb100097f4d4		false	264682	517	113	0	0	0	0	1	undefined	58e3820e5ba4cb100097f2e9
	false	undefined	0							undefined	0	58e383175ba4cb100097f4d5		false	265214	518	112	0	0	0	0	1	undefined	58e3820e5ba4cb100097f2e9
	false	undefined	0							undefined	0	58e383185ba4cb100097f4d6		false	265770	519	111	0	0	0	0	1	undefined	58e3820e5ba4cb100097f2e9
	false	undefined	0							undefined	0	58e383185ba4cb100097f4d7		false	266300	520	109	0	0	0	0	1	undefined	58e3820e5ba4cb100097f2e9
	false	undefined	0							undefined	0	58e383195ba4cb100097f4d8		false	266839	521	112	0	0	0	0	1	undefined	58e3820e5ba4cb100097f2e9
	false	undefined	0							undefined	0	58e383195ba4cb100097f4d9		false	267315	522	115	0	0	0	0	1	undefined	58e3820e5ba4cb100097f2e9
	false	undefined	0							undefined	0	58e3831a5ba4cb100097f4da		false	267885	523	114	0	0	0	0	1	undefined	58e3820e5ba4cb100097f2e9
	false	undefined	0							undefined	0	58e3831b5ba4cb100097f4db		false	268442	524	112	0	0	0	0	1	undefined	58e3820e5ba4cb100097f2e9
	false	undefined	0							undefined	0	58e3831b5ba4cb100097f4dc		false	268979	525	115	0	0	0	0	1	undefined	58e3820e5ba4cb100097f2e9
	false	undefined	0							undefined	0	58e3831c5ba4cb100097f4dd		false	269487	526	115	0	0	0	0	1	undefined	58e3820e5ba4cb100097f2e9
	false	undefined	0							undefined	0	58e3831c5ba4cb100097f4de		false	270039	527	114	0	0	0	0	1	undefined	58e3820e5ba4cb100097f2e9
	false	undefined	0							undefined	0	58e3831d5ba4cb100097f4df		false	270571	528	113	0	0	0	0	1	undefined	58e3820e5ba4cb100097f2e9
	false	undefined	0							undefined	0	58e3831d5ba4cb100097f4e0		false	271161	529	115	0	0	0	0	1	undefined	58e3820e5ba4cb100097f2e9
	false	undefined	0							undefined	0	58e3831e5ba4cb100097f4e1		false	271709	530	114	0	0	0	0	1	undefined	58e3820e5ba4cb100097f2e9
	false	undefined	0							undefined	0	58e3831e5ba4cb100097f4e2		false	272245	531	113	0	0	0	0	1	undefined	58e3820e5ba4cb100097f2e9
	false	undefined	0							undefined	0	58e3831f5ba4cb100097f4e3		false	272781	532	113	0	0	0	0	1	undefined	58e3820e5ba4cb100097f2e9
	false	undefined	0							undefined	0	58e3831f5ba4cb100097f4e4		false	273313	533	115	0	0	0	0	1	undefined	58e3820e5ba4cb100097f2e9
	false	undefined	0							undefined	0	58e383205ba4cb100097f4e5		false	273897	534	118	0	0	0	0	1	undefined	58e3820e5ba4cb100097f2e9
	false	undefined	0							undefined	0	58e383205ba4cb100097f4e6		false	274391	535	117	0	0	0	0	1	undefined	58e3820e5ba4cb100097f2e9
	false	undefined	0							undefined	0	58e383215ba4cb100097f4e7		false	274891	536	117	0	0	0	0	1	undefined	58e3820e5ba4cb100097f2e9
	false	undefined	0							undefined	0	58e383225ba4cb100097f4e8		false	275445	537	117	0	0	0	0	1	undefined	58e3820e5ba4cb100097f2e9
	false	undefined	0							undefined	0	58e383225ba4cb100097f4e9		false	275986	538	118	0	0	0	0	1	undefined	58e3820e5ba4cb100097f2e9
	false	undefined	0							undefined	0	58e383235ba4cb100097f4ea		false	276469	539	117	0	0	0	0	1	undefined	58e3820e5ba4cb100097f2e9
	false	undefined	0							undefined	0	58e383235ba4cb100097f4eb		true	277045	540	114	0	0	0	0	1	undefined	58e3820e5ba4cb100097f2e9
	false	undefined	0							undefined	0	58e383245ba4cb100097f4ec		true	277591	541	66	0	0	0	0	1	undefined	58e3820e5ba4cb100097f2e9
	false	undefined	0							undefined	0	58e383245ba4cb100097f4ed		true	278200	542	-1	0	0	0	0	1	undefined	58e3820e5ba4cb100097f2e9
	false	undefined	0							undefined	0	58e383255ba4cb100097f4ee		true	278651	543	-1	0	0	0	0	1	undefined	58e3820e5ba4cb100097f2e9
	false	undefined	0							undefined	0	58e383255ba4cb100097f4ef		true	279260	547	64	0	0	0	0	1	undefined	58e3820e5ba4cb100097f2e9
	false	undefined	0							undefined	0	58e383265ba4cb100097f4f0		true	279800	548	-1	0	0	0	0	1	undefined	58e3820e5ba4cb100097f2e9
	false	undefined	0							undefined	0	58e383265ba4cb100097f4f1		true	280324	549	81	0	0	0	0	1	undefined	58e3820e5ba4cb100097f2e9
	false	undefined	0							undefined	0	58e383275ba4cb100097f4f2		true	280854	550	80	0	0	0	0	1	undefined	58e3820e5ba4cb100097f2e9
	false	undefined	0							undefined	0	58e383275ba4cb100097f4f3		true	281400	551	-1	0	0	0	0	1	undefined	58e3820e5ba4cb100097f2e9
	false	undefined	0							undefined	0	58e383285ba4cb100097f4f4		false	281929	552	47	0	0	0	0	1	undefined	58e3820e5ba4cb100097f2e9
	false	undefined	0							undefined	0	58e383295ba4cb100097f4f5		false	282458	553	47	0	0	0	0	1	undefined	58e3820e5ba4cb100097f2e9
	false	undefined	0							undefined	0	58e383295ba4cb100097f4f6		false	282999	554	46	0	0	0	0	1	undefined	58e3820e5ba4cb100097f2e9
	false	undefined	0							undefined	0	58e3832a5ba4cb100097f4f7		false	283518	555	46	0	0	0	0	1	undefined	58e3820e5ba4cb100097f2e9
	false	undefined	0							undefined	0	58e3832a5ba4cb100097f4f8		true	284073	556	47	0	0	0	0	1	undefined	58e3820e5ba4cb100097f2e9
	false	undefined	0							undefined	0	58e3832b5ba4cb100097f4f9		true	284610	557	48	0	0	0	0	1	undefined	58e3820e5ba4cb100097f2e9
	false	undefined	0							undefined	0	58e3832b5ba4cb100097f4fa		true	285134	558	46	0	0	0	0	1	undefined	58e3820e5ba4cb100097f2e9
	false	undefined	0							undefined	0	58e3832c5ba4cb100097f4fb		true	285670	559	51	0	0	0	0	1	undefined	58e3820e5ba4cb100097f2e9
	false	undefined	0							undefined	0	58e3832c5ba4cb100097f4fc		true	286202	560	53	0	0	0	0	1	undefined	58e3820e5ba4cb100097f2e9
	false	undefined	0							undefined	0	58e3832d5ba4cb100097f4fd		true	286722	570	47	0	0	0	0	1	undefined	58e3820e5ba4cb100097f2e9
	false	undefined	0							undefined	0	58e3832d5ba4cb100097f4fe		true	287291	571	50	0	0	0	0	1	undefined	58e3820e5ba4cb100097f2e9
	false	undefined	0							undefined	0	58e3832e5ba4cb100097f4ff		true	287807	572	-1	0	0	0	0	1	undefined	58e3820e5ba4cb100097f2e9
	false	undefined	0							undefined	0	58e3832e5ba4cb100097f500		true	288327	573	-1	0	0	0	0	1	undefined	58e3820e5ba4cb100097f2e9
	false	undefined	0							undefined	0	58e3832f5ba4cb100097f501		true	288881	574	-1	0	0	0	0	1	undefined	58e3820e5ba4cb100097f2e9
	false	undefined	0							undefined	0	58e3832f5ba4cb100097f502		true	289416	575	-1	0	0	0	0	1	undefined	58e3820e5ba4cb100097f2e9
	false	undefined	0							undefined	0	58e383305ba4cb100097f503		true	289945	576	-1	0	0	0	0	1	undefined	58e3820e5ba4cb100097f2e9
	false	undefined	0							undefined	0	58e383315ba4cb100097f504		true	290476	577	-1	0	0	0	0	1	undefined	58e3820e5ba4cb100097f2e9
	false	undefined	0							undefined	0	58e383315ba4cb100097f505		true	291021	578	-1	0	0	0	0	1	undefined	58e3820e5ba4cb100097f2e9
	false	undefined	0							undefined	0	58e383325ba4cb100097f506		false	291620	579	-1	0	0	0	0	1	undefined	58e3820e5ba4cb100097f2e9
	false	undefined	0							undefined	0	58e383325ba4cb100097f507		false	292149	580	-1	0	0	0	0	1	undefined	58e3820e5ba4cb100097f2e9
	false	undefined	0							undefined	0	58e383335ba4cb100097f508		false	292684	581	-1	0	0	0	0	1	undefined	58e3820e5ba4cb100097f2e9
	false	undefined	0							undefined	0	58e383335ba4cb100097f509		false	293298	582	-1	0	0	0	0	1	undefined	58e3820e5ba4cb100097f2e9
	false	undefined	0							undefined	0	58e383345ba4cb100097f50a		false	293819	583	-1	0	0	0	0	1	undefined	58e3820e5ba4cb100097f2e9
	false	undefined	0							undefined	0	58e383345ba4cb100097f50b		false	294346	584	-1	0	0	0	0	1	undefined	58e3820e5ba4cb100097f2e9
	false	undefined	0							undefined	0	58e383355ba4cb100097f50c		true	294890	585	-1	0	0	0	0	1	undefined	58e3820e5ba4cb100097f2e9
	false	undefined	0							undefined	0	58e383365ba4cb100097f50d		true	295494	586	-1	0	0	0	0	1	undefined	58e3820e5ba4cb100097f2e9
	false	undefined	0							undefined	0	58e383365ba4cb100097f50e		true	296027	587	-1	0	0	0	0	1	undefined	58e3820e5ba4cb100097f2e9
	false	undefined	0							undefined	0	58e383375ba4cb100097f50f		true	296624	588	-1	0	0	0	0	1	undefined	58e3820e5ba4cb100097f2e9
	false	undefined	0							undefined	0	58e383375ba4cb100097f510		true	297224	589	-1	0	0	0	0	1	undefined	58e3820e5ba4cb100097f2e9
	false	undefined	0							undefined	0	58e383385ba4cb100097f511		true	297835	590	-1	0	0	0	0	1	undefined	58e3820e5ba4cb100097f2e9
	false	undefined	0							undefined	0	58e383385ba4cb100097f512		true	298370	591	-1	0	0	0	0	1	undefined	58e3820e5ba4cb100097f2e9
	false	undefined	0							undefined	0	58e383395ba4cb100097f513		true	298893	592	-1	0	0	0	0	1	undefined	58e3820e5ba4cb100097f2e9
	false	undefined	0							undefined	0	58e3833a5ba4cb100097f514		true	299433	593	-1	0	0	0	0	1	undefined	58e3820e5ba4cb100097f2e9
	false	undefined	0							undefined	0	58e3833a5ba4cb100097f515		true	299937	594	-1	0	0	0	0	1	undefined	58e3820e5ba4cb100097f2e9
	false	undefined	0							undefined	0	58e3833b5ba4cb100097f516		true	300473	595	-1	0	0	0	0	1	undefined	58e3820e5ba4cb100097f2e9
	false	undefined	0							undefined	0	58e3833b5ba4cb100097f517		true	301042	596	-1	0	0	0	0	1	undefined	58e3820e5ba4cb100097f2e9
	false	undefined	0							undefined	0	58e3833c5ba4cb100097f518		true	301577	597	-1	0	0	0	0	1	undefined	58e3820e5ba4cb100097f2e9
	false	undefined	0							undefined	0	58e3833c5ba4cb100097f519		true	302175	598	-1	0	0	0	0	1	undefined	58e3820e5ba4cb100097f2e9
	false	undefined	0							undefined	0	58e3833d5ba4cb100097f51a		true	302638	599	-1	0	0	0	0	1	undefined	58e3820e5ba4cb100097f2e9
	false	undefined	0							undefined	0	58e3833d5ba4cb100097f51b		true	303175	600	-1	0	0	0	0	1	undefined	58e3820e5ba4cb100097f2e9
	false	undefined	0							undefined	0	58e3833e5ba4cb100097f51c		true	303664	601	-1	0	0	0	0	1	undefined	58e3820e5ba4cb100097f2e9
	false	undefined	0							undefined	0	58e3833e5ba4cb100097f51d		true	304224	602	-1	0	0	0	0	1	undefined	58e3820e5ba4cb100097f2e9
	false	undefined	0							undefined	0	58e3833f5ba4cb100097f51e		false	304786	603	-1	0	0	0	0	1	undefined	58e3820e5ba4cb100097f2e9
	false	undefined	0							undefined	0	58e3833f5ba4cb100097f51f		false	305380	604	-1	0	0	0	0	1	undefined	58e3820e5ba4cb100097f2e9
	false	undefined	0							undefined	0	58e383405ba4cb100097f520		false	305906	605	-1	0	0	0	0	1	undefined	58e3820e5ba4cb100097f2e9
	false	undefined	0							undefined	0	58e383415ba4cb100097f521		false	306446	606	-1	0	0	0	0	1	undefined	58e3820e5ba4cb100097f2e9
	false	undefined	0							undefined	0	58e383415ba4cb100097f522		false	306965	607	-1	0	0	0	0	1	undefined	58e3820e5ba4cb100097f2e9
	false	undefined	0							undefined	0	58e383425ba4cb100097f523		false	307512	608	117	0	0	0	0	1	undefined	58e3820e5ba4cb100097f2e9
	false	undefined	0							undefined	0	58e383425ba4cb100097f524		false	308053	609	117	0	0	0	0	1	undefined	58e3820e5ba4cb100097f2e9
	false	undefined	0							undefined	0	58e383435ba4cb100097f525		false	308590	610	114	0	0	0	0	1	undefined	58e3820e5ba4cb100097f2e9
	false	undefined	0							undefined	0	58e383435ba4cb100097f526		false	309114	614	118	0	0	0	0	1	undefined	58e3820e5ba4cb100097f2e9
	false	undefined	0							undefined	0	58e383445ba4cb100097f527		false	309650	615	118	0	0	0	0	1	undefined	58e3820e5ba4cb100097f2e9
	false	undefined	0							undefined	0	58e383445ba4cb100097f528		false	310119	616	116	0	0	0	0	1	undefined	58e3820e5ba4cb100097f2e9
	false	undefined	0							undefined	0	58e383455ba4cb100097f529		false	310652	617	118	0	0	0	0	1	undefined	58e3820e5ba4cb100097f2e9
	false	undefined	0							undefined	0	58e383455ba4cb100097f52a		false	311185	618	122	0	0	0	0	1	undefined	58e3820e5ba4cb100097f2e9
	false	undefined	0							undefined	0	58e383465ba4cb100097f52b		false	311674	619	122	0	0	0	0	1	undefined	58e3820e5ba4cb100097f2e9
	false	undefined	0							undefined	0	58e383465ba4cb100097f52c		false	312247	620	122	0	0	0	0	1	undefined	58e3820e5ba4cb100097f2e9
	false	undefined	0							undefined	0	58e383475ba4cb100097f52d		false	312790	621	119	0	0	0	0	1	undefined	58e3820e5ba4cb100097f2e9
	false	undefined	0							undefined	0	58e383475ba4cb100097f52e		false	313317	622	120	0	0	0	0	1	undefined	58e3820e5ba4cb100097f2e9
	false	undefined	0							undefined	0	58e383485ba4cb100097f52f		false	313861	623	120	0	0	0	0	1	undefined	58e3820e5ba4cb100097f2e9
	false	undefined	0							undefined	0	58e383495ba4cb100097f530		false	314511	624	120	0	0	0	0	1	undefined	58e3820e5ba4cb100097f2e9
	false	undefined	0							undefined	0	58e383495ba4cb100097f531		false	315000	625	119	0	0	0	0	1	undefined	58e3820e5ba4cb100097f2e9
	false	undefined	0							undefined	0	58e3834a5ba4cb100097f532		false	315526	626	118	0	0	0	0	1	undefined	58e3820e5ba4cb100097f2e9
	false	undefined	0							undefined	0	58e3834a5ba4cb100097f533		false	316067	627	119	0	0	0	0	1	undefined	58e3820e5ba4cb100097f2e9
	false	undefined	0							undefined	0	58e3834b5ba4cb100097f534		false	316595	628	120	0	0	0	0	1	undefined	58e3820e5ba4cb100097f2e9
	false	undefined	0							undefined	0	58e3834b5ba4cb100097f535		false	317144	629	119	0	0	0	0	1	undefined	58e3820e5ba4cb100097f2e9
	false	undefined	0							undefined	0	58e3834c5ba4cb100097f536		false	317681	630	118	0	0	0	0	1	undefined	58e3820e5ba4cb100097f2e9
	false	undefined	0							undefined	0	58e3834c5ba4cb100097f537		false	318210	631	119	0	0	0	0	1	undefined	58e3820e5ba4cb100097f2e9
	false	undefined	0							undefined	0	58e3834d5ba4cb100097f538		false	318737	632	117	0	0	0	0	1	undefined	58e3820e5ba4cb100097f2e9
	false	undefined	0							undefined	0	58e3834d5ba4cb100097f539		false	319275	633	117	0	0	0	0	1	undefined	58e3820e5ba4cb100097f2e9
	false	undefined	0							undefined	0	58e3834e5ba4cb100097f53a		false	319856	634	116	0	0	0	0	1	undefined	58e3820e5ba4cb100097f2e9
	false	undefined	0							undefined	0	58e3834e5ba4cb100097f53b		false	320390	635	115	0	0	0	0	1	undefined	58e3820e5ba4cb100097f2e9
	false	undefined	0							undefined	0	58e3834f5ba4cb100097f53c		false	320991	636	116	0	0	0	0	1	undefined	58e3820e5ba4cb100097f2e9
	false	undefined	0							undefined	0	58e383505ba4cb100097f53d		false	321484	637	115	0	0	0	0	1	undefined	58e3820e5ba4cb100097f2e9
	false	undefined	0							undefined	0	58e383505ba4cb100097f53e		false	322011	638	119	0	0	0	0	1	undefined	58e3820e5ba4cb100097f2e9
	false	undefined	0							undefined	0	58e383515ba4cb100097f53f		false	322552	639	121	0	0	0	0	1	undefined	58e3820e5ba4cb100097f2e9
	false	undefined	0							undefined	0	58e383515ba4cb100097f540		false	323090	640	120	0	0	0	0	1	undefined	58e3820e5ba4cb100097f2e9
	false	undefined	0							undefined	0	58e383525ba4cb100097f541		false	323663	641	123	0	0	0	0	1	undefined	58e3820e5ba4cb100097f2e9
	false	undefined	0							undefined	0	58e383525ba4cb100097f542		false	324191	642	118	0	0	0	0	1	undefined	58e3820e5ba4cb100097f2e9
	false	undefined	0							undefined	0	58e383535ba4cb100097f543		false	324677	643	118	0	0	0	0	1	undefined	58e3820e5ba4cb100097f2e9
	false	undefined	0							undefined	0	58e383535ba4cb100097f544		false	325220	644	117	0	0	0	0	1	undefined	58e3820e5ba4cb100097f2e9
	false	undefined	0							undefined	0	58e383545ba4cb100097f545		false	325751	645	118	0	0	0	0	1	undefined	58e3820e5ba4cb100097f2e9
	false	undefined	0							undefined	0	58e383545ba4cb100097f546		false	326288	646	118	0	0	0	0	1	undefined	58e3820e5ba4cb100097f2e9
	false	undefined	0							undefined	0	58e383555ba4cb100097f547		false	326948	647	115	0	0	0	0	1	undefined	58e3820e5ba4cb100097f2e9
	false	undefined	0							undefined	0	58e383565ba4cb100097f548		false	327479	648	119	0	0	0	0	1	undefined	58e3820e5ba4cb100097f2e9
	false	undefined	0							undefined	0	58e383565ba4cb100097f549		false	327935	649	118	0	0	0	0	1	undefined	58e3820e5ba4cb100097f2e9
	false	undefined	0							undefined	0	58e383575ba4cb100097f54a		false	328497	650	116	0	0	0	0	1	undefined	58e3820e5ba4cb100097f2e9
	false	undefined	0							undefined	0	58e383575ba4cb100097f54b		false	329030	651	117	0	0	0	0	1	undefined	58e3820e5ba4cb100097f2e9
	false	undefined	0							undefined	0	58e383585ba4cb100097f54c		false	329496	652	119	0	0	0	0	1	undefined	58e3820e5ba4cb100097f2e9
	false	undefined	0							undefined	0	58e383585ba4cb100097f54d		false	330158	653	120	0	0	0	0	1	undefined	58e3820e5ba4cb100097f2e9
	false	undefined	0							undefined	0	58e383595ba4cb100097f54e		false	330764	654	116	0	0	0	0	1	undefined	58e3820e5ba4cb100097f2e9
	false	undefined	0							undefined	0	58e383595ba4cb100097f54f		false	331305	655	119	0	0	0	0	1	undefined	58e3820e5ba4cb100097f2e9
	false	undefined	0							undefined	0	58e3835a5ba4cb100097f550		false	331813	656	119	0	0	0	0	1	undefined	58e3820e5ba4cb100097f2e9
	false	undefined	0							undefined	0	58e3835a5ba4cb100097f551		false	332370	657	118	0	0	0	0	1	undefined	58e3820e5ba4cb100097f2e9
	false	undefined	0							undefined	0	58e3835b5ba4cb100097f552		false	332901	658	121	0	0	0	0	1	undefined	58e3820e5ba4cb100097f2e9
	false	undefined	0							undefined	0	58e3835b5ba4cb100097f553		false	333384	659	123	0	0	0	0	1	undefined	58e3820e5ba4cb100097f2e9
	false	undefined	0							undefined	0	58e3835c5ba4cb100097f554		false	333963	660	122	0	0	0	0	1	undefined	58e3820e5ba4cb100097f2e9
	false	undefined	0							undefined	0	58e3835d5ba4cb100097f555		false	334436	661	115	0	0	0	0	1	undefined	58e3820e5ba4cb100097f2e9
	false	undefined	0							undefined	0	58e3835d5ba4cb100097f556		false	334974	662	113	0	0	0	0	1	undefined	58e3820e5ba4cb100097f2e9
	false	undefined	0							undefined	0	58e3835e5ba4cb100097f557		false	335501	663	115	0	0	0	0	1	undefined	58e3820e5ba4cb100097f2e9
	false	undefined	0							undefined	0	58e3835e5ba4cb100097f558		false	335961	664	113	0	0	0	0	1	undefined	58e3820e5ba4cb100097f2e9
	false	undefined	0							undefined	0	58e3835f5ba4cb100097f559		false	336514	665	113	0	0	0	0	1	undefined	58e3820e5ba4cb100097f2e9
	false	undefined	0							undefined	0	58e3835f5ba4cb100097f55a		false	337039	666	113	0	0	0	0	1	undefined	58e3820e5ba4cb100097f2e9
	false	undefined	0							undefined	0	58e383605ba4cb100097f55b		false	337565	667	115	0	0	0	0	1	undefined	58e3820e5ba4cb100097f2e9
	false	undefined	0							undefined	0	58e383605ba4cb100097f55c		false	338091	668	116	0	0	0	0	1	undefined	58e3820e5ba4cb100097f2e9
	false	undefined	0							undefined	0	58e383615ba4cb100097f55d		false	338638	669	114	0	0	0	0	1	undefined	58e3820e5ba4cb100097f2e9
	false	undefined	0							undefined	0	58e383615ba4cb100097f55e		false	339183	670	116	0	0	0	0	1	undefined	58e3820e5ba4cb100097f2e9
	false	undefined	0							undefined	0	58e383625ba4cb100097f55f		false	339685	671	116	0	0	0	0	1	undefined	58e3820e5ba4cb100097f2e9
	false	undefined	0							undefined	0	58e383625ba4cb100097f560		false	340236	672	115	0	0	0	0	1	undefined	58e3820e5ba4cb100097f2e9
	false	undefined	0							undefined	0	58e383635ba4cb100097f561		false	340783	673	116	0	0	0	0	1	undefined	58e3820e5ba4cb100097f2e9
	false	undefined	0							undefined	0	58e383635ba4cb100097f562		false	341389	674	116	0	0	0	0	1	undefined	58e3820e5ba4cb100097f2e9
	false	undefined	0							undefined	0	58e383645ba4cb100097f563		false	341900	675	116	0	0	0	0	1	undefined	58e3820e5ba4cb100097f2e9
	false	undefined	0							undefined	0	58e383645ba4cb100097f564		false	342379	676	115	0	0	0	0	1	undefined	58e3820e5ba4cb100097f2e9
	false	undefined	0							undefined	0	58e383655ba4cb100097f565		false	342921	677	114	0	0	0	0	1	undefined	58e3820e5ba4cb100097f2e9
	false	undefined	0							undefined	0	58e383665ba4cb100097f566		false	343520	678	117	0	0	0	0	1	undefined	58e3820e5ba4cb100097f2e9
	false	undefined	0							undefined	0	58e383665ba4cb100097f567		false	344058	679	115	0	0	0	0	1	undefined	58e3820e5ba4cb100097f2e9
	false	undefined	0							undefined	0	58e383675ba4cb100097f568		false	344648	680	116	0	0	0	0	1	undefined	58e3820e5ba4cb100097f2e9
	false	undefined	0							undefined	0	58e383675ba4cb100097f569		false	345119	681	114	0	0	0	0	1	undefined	58e3820e5ba4cb100097f2e9
	false	undefined	0							undefined	0	58e383685ba4cb100097f56a		false	345696	682	117	0	0	0	0	1	undefined	58e3820e5ba4cb100097f2e9
	false	undefined	0							undefined	0	58e383685ba4cb100097f56b		false	346202	683	114	0	0	0	0	1	undefined	58e3820e5ba4cb100097f2e9
	false	undefined	0							undefined	0	58e383695ba4cb100097f56c		false	346781	684	114	0	0	0	0	1	undefined	58e3820e5ba4cb100097f2e9
	false	undefined	0							undefined	0	58e383695ba4cb100097f56d		false	347257	685	113	0	0	0	0	1	undefined	58e3820e5ba4cb100097f2e9
	false	undefined	0							undefined	0	58e3836a5ba4cb100097f56e		false	347868	686	111	0	0	0	0	1	undefined	58e3820e5ba4cb100097f2e9
	false	undefined	0							undefined	0	58e3836a5ba4cb100097f56f		false	348400	687	113	0	0	0	0	1	undefined	58e3820e5ba4cb100097f2e9
	false	undefined	0							undefined	0	58e3836b5ba4cb100097f570		false	349009	688	112	0	0	0	0	1	undefined	58e3820e5ba4cb100097f2e9
	false	undefined	0							undefined	0	58e3836c5ba4cb100097f571		false	349476	689	112	0	0	0	0	1	undefined	58e3820e5ba4cb100097f2e9
	false	undefined	0							undefined	0	58e3836c5ba4cb100097f572		false	350002	690	109	0	0	0	0	1	undefined	58e3820e5ba4cb100097f2e9
	false	undefined	0							undefined	0	58e3836d5ba4cb100097f573		false	350680	691	111	0	0	0	0	1	undefined	58e3820e5ba4cb100097f2e9
	false	undefined	0							undefined	0	58e3836d5ba4cb100097f574		false	351217	692	114	0	0	0	0	1	undefined	58e3820e5ba4cb100097f2e9
	false	undefined	0							undefined	0	58e3836e5ba4cb100097f575		false	351739	693	116	0	0	0	0	1	undefined	58e3820e5ba4cb100097f2e9
	false	undefined	0							undefined	0	58e3836e5ba4cb100097f576		false	352282	694	113	0	0	0	0	1	undefined	58e3820e5ba4cb100097f2e9
	false	undefined	0							undefined	0	58e3836f5ba4cb100097f577		false	352879	695	114	0	0	0	0	1	undefined	58e3820e5ba4cb100097f2e9
	false	undefined	0							undefined	0	58e3836f5ba4cb100097f578		false	353401	696	116	0	0	0	0	1	undefined	58e3820e5ba4cb100097f2e9
	false	undefined	0							undefined	0	58e383705ba4cb100097f579		false	353942	697	118	0	0	0	0	1	undefined	58e3820e5ba4cb100097f2e9
	false	undefined	0							undefined	0	58e383715ba4cb100097f57a		false	354465	698	117	0	0	0	0	1	undefined	58e3820e5ba4cb100097f2e9
	false	undefined	0							undefined	0	58e383715ba4cb100097f57b		false	355009	699	116	0	0	0	0	1	undefined	58e3820e5ba4cb100097f2e9
	false	undefined	0							undefined	0	58e383725ba4cb100097f57c		false	355531	700	115	0	0	0	0	1	undefined	58e3820e5ba4cb100097f2e9
	false	undefined	0							undefined	0	58e383725ba4cb100097f57d		false	356072	701	114	0	0	0	0	1	undefined	58e3820e5ba4cb100097f2e9
	false	undefined	0							undefined	0	58e383735ba4cb100097f57e		false	356620	702	114	0	0	0	0	1	undefined	58e3820e5ba4cb100097f2e9
	false	undefined	0							undefined	0	58e383735ba4cb100097f57f		false	357145	703	114	0	0	0	0	1	undefined	58e3820e5ba4cb100097f2e9
	false	undefined	0							undefined	0	58e383745ba4cb100097f580		false	357674	704	117	0	0	0	0	1	undefined	58e3820e5ba4cb100097f2e9
	false	undefined	0							undefined	0	58e383745ba4cb100097f581		false	358215	705	118	0	0	0	0	1	undefined	58e3820e5ba4cb100097f2e9
	false	undefined	0							undefined	0	58e383755ba4cb100097f582		false	358812	706	120	0	0	0	0	1	undefined	58e3820e5ba4cb100097f2e9
	false	undefined	0							undefined	0	58e383755ba4cb100097f583		false	359278	707	117	0	0	0	0	1	undefined	58e3820e5ba4cb100097f2e9
	false	undefined	0							undefined	0	58e383765ba4cb100097f584		false	359816	708	113	0	0	0	0	1	undefined	58e3820e5ba4cb100097f2e9
	false	undefined	0							undefined	0	58e383765ba4cb100097f585		false	360432	709	112	0	0	0	0	1	undefined	58e3820e5ba4cb100097f2e9
	false	undefined	0							undefined	0	58e383775ba4cb100097f586		false	361031	710	111	0	0	0	0	1	undefined	58e3820e5ba4cb100097f2e9
	false	undefined	0							undefined	0	58e383785ba4cb100097f587		false	361557	711	115	0	0	0	0	1	undefined	58e3820e5ba4cb100097f2e9
	false	undefined	0							undefined	0	58e383785ba4cb100097f588		false	362086	712	114	0	0	0	0	1	undefined	58e3820e5ba4cb100097f2e9
	false	undefined	0							undefined	0	58e383795ba4cb100097f589		false	362694	713	114	0	0	0	0	1	undefined	58e3820e5ba4cb100097f2e9
	false	undefined	0							undefined	0	58e383795ba4cb100097f58a		false	363234	714	113	0	0	0	0	1	undefined	58e3820e5ba4cb100097f2e9
	false	undefined	0							undefined	0	58e3837a5ba4cb100097f58b		false	363744	715	115	0	0	0	0	1	undefined	58e3820e5ba4cb100097f2e9
	false	undefined	0							undefined	0	58e3837a5ba4cb100097f58c		false	364299	716	114	0	0	0	0	1	undefined	58e3820e5ba4cb100097f2e9
	false	undefined	0							undefined	0	58e3837b5ba4cb100097f58d		false	364910	717	112	0	0	0	0	1	undefined	58e3820e5ba4cb100097f2e9
	false	undefined	0							undefined	0	58e3837c5ba4cb100097f58e		false	365423	718	112	0	0	0	0	1	undefined	58e3820e5ba4cb100097f2e9
	false	undefined	0							undefined	0	58e3837c5ba4cb100097f58f		false	366042	719	111	0	0	0	0	1	undefined	58e3820e5ba4cb100097f2e9
	false	undefined	0							undefined	0	58e3837d5ba4cb100097f590		false	366555	720	113	0	0	0	0	1	undefined	58e3820e5ba4cb100097f2e9
	false	undefined	0							undefined	0	58e3837d5ba4cb100097f591		false	367079	721	114	0	0	0	0	1	undefined	58e3820e5ba4cb100097f2e9
	false	undefined	0							undefined	0	58e3837e5ba4cb100097f592		false	367555	722	115	0	0	0	0	1	undefined	58e3820e5ba4cb100097f2e9
	false	undefined	0							undefined	0	58e3837e5ba4cb100097f593		false	368175	723	117	0	0	0	0	1	undefined	58e3820e5ba4cb100097f2e9
	false	undefined	0							undefined	0	58e3837f5ba4cb100097f594		false	368636	724	115	0	0	0	0	1	undefined	58e3820e5ba4cb100097f2e9
	false	undefined	0							undefined	0	58e3837f5ba4cb100097f595		false	369240	725	116	0	0	0	0	1	undefined	58e3820e5ba4cb100097f2e9
	false	undefined	0							undefined	0	58e383805ba4cb100097f596		false	369772	726	115	0	0	0	0	1	undefined	58e3820e5ba4cb100097f2e9
	false	undefined	0							undefined	0	58e383805ba4cb100097f597		false	370377	727	114	0	0	0	0	1	undefined	58e3820e5ba4cb100097f2e9
	false	undefined	0							undefined	0	58e383815ba4cb100097f598		false	370895	728	115	0	0	0	0	1	undefined	58e3820e5ba4cb100097f2e9
	false	undefined	0							undefined	0	58e383815ba4cb100097f599		false	371371	729	113	0	0	0	0	1	undefined	58e3820e5ba4cb100097f2e9
	false	undefined	0							undefined	0	58e383825ba4cb100097f59a		false	371893	730	117	0	0	0	0	1	undefined	58e3820e5ba4cb100097f2e9
	false	undefined	0							undefined	0	58e383825ba4cb100097f59b		false	372436	731	119	0	0	0	0	1	undefined	58e3820e5ba4cb100097f2e9
	false	undefined	0							undefined	0	58e383835ba4cb100097f59c		false	372910	732	118	0	0	0	0	1	undefined	58e3820e5ba4cb100097f2e9
	false	undefined	0							undefined	0	58e383845ba4cb100097f59d		false	373503	733	116	0	0	0	0	1	undefined	58e3820e5ba4cb100097f2e9
	false	undefined	0							undefined	0	58e383845ba4cb100097f59e		false	374048	734	115	0	0	0	0	1	undefined	58e3820e5ba4cb100097f2e9
	false	undefined	0							undefined	0	58e383855ba4cb100097f59f		false	374589	735	115	0	0	0	0	1	undefined	58e3820e5ba4cb100097f2e9
	false	undefined	0							undefined	0	58e383855ba4cb100097f5a0		false	375190	736	115	0	0	0	0	1	undefined	58e3820e5ba4cb100097f2e9
	false	undefined	0							undefined	0	58e383865ba4cb100097f5a1		false	375722	737	115	0	0	0	0	1	undefined	58e3820e5ba4cb100097f2e9
	false	undefined	0							undefined	0	58e383865ba4cb100097f5a2		false	376240	738	115	0	0	0	0	1	undefined	58e3820e5ba4cb100097f2e9
	false	undefined	0							undefined	0	58e383875ba4cb100097f5a3		false	376779	739	114	0	0	0	0	1	undefined	58e3820e5ba4cb100097f2e9
	false	undefined	0							undefined	0	58e383875ba4cb100097f5a4		false	377321	740	116	0	0	0	0	1	undefined	58e3820e5ba4cb100097f2e9
	false	undefined	0							undefined	0	58e383885ba4cb100097f5a5		false	377850	741	120	0	0	0	0	1	undefined	58e3820e5ba4cb100097f2e9
	false	undefined	0							undefined	0	58e383885ba4cb100097f5a6		false	378379	742	119	0	0	0	0	1	undefined	58e3820e5ba4cb100097f2e9
	false	undefined	0							undefined	0	58e383895ba4cb100097f5a7		false	378859	743	115	0	0	0	0	1	undefined	58e3820e5ba4cb100097f2e9
	false	undefined	0							undefined	0	58e3838a5ba4cb100097f5a8		false	379463	744	118	0	0	0	0	1	undefined	58e3820e5ba4cb100097f2e9
	false	undefined	0							undefined	0	58e3838a5ba4cb100097f5a9		false	379931	745	115	0	0	0	0	1	undefined	58e3820e5ba4cb100097f2e9
	false	undefined	0							undefined	0	58e3838b5ba4cb100097f5aa		false	380464	746	117	0	0	0	0	1	undefined	58e3820e5ba4cb100097f2e9
	false	undefined	0							undefined	0	58e3838b5ba4cb100097f5ab		false	380994	747	114	0	0	0	0	1	undefined	58e3820e5ba4cb100097f2e9
	false	undefined	0							undefined	0	58e3838c5ba4cb100097f5ac		false	381534	748	111	0	0	0	0	1	undefined	58e3820e5ba4cb100097f2e9
	false	undefined	0							undefined	0	58e3838c5ba4cb100097f5ad		false	382128	749	111	0	0	0	0	1	undefined	58e3820e5ba4cb100097f2e9
	false	undefined	0							undefined	0	58e3838d5ba4cb100097f5ae		false	382648	750	109	0	0	0	0	1	undefined	58e3820e5ba4cb100097f2e9
	false	undefined	0							undefined	0	58e3838d5ba4cb100097f5af		false	383193	751	112	0	0	0	0	1	undefined	58e3820e5ba4cb100097f2e9
	false	undefined	0							undefined	0	58e3838e5ba4cb100097f5b0		false	383733	752	111	0	0	0	0	1	undefined	58e3820e5ba4cb100097f2e9
	false	undefined	0							undefined	0	58e3838e5ba4cb100097f5b1		false	384269	753	112	0	0	0	0	1	undefined	58e3820e5ba4cb100097f2e9
	false	undefined	0							undefined	0	58e3838f5ba4cb100097f5b2		false	384721	754	111	0	0	0	0	1	undefined	58e3820e5ba4cb100097f2e9
	false	undefined	0							undefined	0	58e3838f5ba4cb100097f5b3		false	385333	755	113	0	0	0	0	1	undefined	58e3820e5ba4cb100097f2e9
	false	undefined	0							undefined	0	58e383905ba4cb100097f5b4		false	385827	756	114	0	0	0	0	1	undefined	58e3820e5ba4cb100097f2e9
	false	undefined	0							undefined	0	58e383905ba4cb100097f5b5		false	386324	757	113	0	0	0	0	1	undefined	58e3820e5ba4cb100097f2e9
	false	undefined	0							undefined	0	58e383915ba4cb100097f5b6		false	386973	758	113	0	0	0	0	1	undefined	58e3820e5ba4cb100097f2e9
	false	undefined	0							undefined	0	58e383925ba4cb100097f5b7		false	387546	759	113	0	0	0	0	1	undefined	58e3820e5ba4cb100097f2e9
	false	undefined	0							undefined	0	58e383925ba4cb100097f5b8		false	388143	760	115	0	0	0	0	1	undefined	58e3820e5ba4cb100097f2e9
	false	undefined	0							undefined	0	58e383935ba4cb100097f5b9		false	388742	761	114	0	0	0	0	1	undefined	58e3820e5ba4cb100097f2e9
	false	undefined	0							undefined	0	58e383935ba4cb100097f5ba		false	389277	762	115	0	0	0	0	1	undefined	58e3820e5ba4cb100097f2e9
	false	undefined	0							undefined	0	58e383945ba4cb100097f5bb		false	389809	763	118	0	0	0	0	1	undefined	58e3820e5ba4cb100097f2e9
	false	undefined	0							undefined	0	58e383945ba4cb100097f5bc		false	390332	764	119	0	0	0	0	1	undefined	58e3820e5ba4cb100097f2e9
	false	undefined	0							undefined	0	58e383955ba4cb100097f5bd		false	390872	765	118	0	0	0	0	1	undefined	58e3820e5ba4cb100097f2e9
	false	undefined	0							undefined	0	58e383955ba4cb100097f5be		false	391412	766	115	0	0	0	0	1	undefined	58e3820e5ba4cb100097f2e9
	false	undefined	0							undefined	0	58e383965ba4cb100097f5bf		false	391927	767	114	0	0	0	0	1	undefined	58e3820e5ba4cb100097f2e9
	false	undefined	0							undefined	0	58e383975ba4cb100097f5c0		false	392482	768	112	0	0	0	0	1	undefined	58e3820e5ba4cb100097f2e9
	false	undefined	0							undefined	0	58e383975ba4cb100097f5c1		false	393007	769	111	0	0	0	0	1	undefined	58e3820e5ba4cb100097f2e9
	false	undefined	0							undefined	0	58e383985ba4cb100097f5c2		false	393628	770	112	0	0	0	0	1	undefined	58e3820e5ba4cb100097f2e9
	false	undefined	0							undefined	0	58e383985ba4cb100097f5c3		false	394151	771	113	0	0	0	0	1	undefined	58e3820e5ba4cb100097f2e9
	false	undefined	0							undefined	0	58e383995ba4cb100097f5c4		false	394678	772	114	0	0	0	0	1	undefined	58e3820e5ba4cb100097f2e9
	false	undefined	0							undefined	0	58e383995ba4cb100097f5c5		false	395209	773	114	0	0	0	0	1	undefined	58e3820e5ba4cb100097f2e9
	false	undefined	0							undefined	0	58e3839a5ba4cb100097f5c6		false	395751	774	114	0	0	0	0	1	undefined	58e3820e5ba4cb100097f2e9
	false	undefined	0							undefined	0	58e3839a5ba4cb100097f5c7		false	396358	775	115	0	0	0	0	1	undefined	58e3820e5ba4cb100097f2e9
	false	undefined	0							undefined	0	58e3839b5ba4cb100097f5c8		false	396895	776	116	0	0	0	0	1	undefined	58e3820e5ba4cb100097f2e9
	false	undefined	0							undefined	0	58e3839c5ba4cb100097f5c9		false	397440	777	117	0	0	0	0	1	undefined	58e3820e5ba4cb100097f2e9
	false	undefined	0							undefined	0	58e3839c5ba4cb100097f5ca		false	397884	778	114	0	0	0	0	1	undefined	58e3820e5ba4cb100097f2e9
	false	undefined	0							undefined	0	58e3839d5ba4cb100097f5cb		false	398498	779	116	0	0	0	0	1	undefined	58e3820e5ba4cb100097f2e9
	false	undefined	0							undefined	0	58e3839d5ba4cb100097f5cc		false	398951	780	115	0	0	0	0	1	undefined	58e3820e5ba4cb100097f2e9
	false	undefined	0							undefined	0	58e3839e5ba4cb100097f5cd		false	399614	781	115	0	0	0	0	1	undefined	58e3820e5ba4cb100097f2e9
	false	undefined	0							undefined	0	58e3839e5ba4cb100097f5ce		false	400179	782	114	0	0	0	0	1	undefined	58e3820e5ba4cb100097f2e9
	false	undefined	0							undefined	0	58e3839f5ba4cb100097f5cf		false	400815	783	113	0	0	0	0	1	undefined	58e3820e5ba4cb100097f2e9
	false	undefined	0							undefined	0	58e3839f5ba4cb100097f5d0		false	401369	784	115	0	0	0	0	1	undefined	58e3820e5ba4cb100097f2e9
	false	undefined	0							undefined	0	58e383a05ba4cb100097f5d1		false	401903	785	113	0	0	0	0	1	undefined	58e3820e5ba4cb100097f2e9
	false	undefined	0							undefined	0	58e383a05ba4cb100097f5d2		false	402374	786	115	0	0	0	0	1	undefined	58e3820e5ba4cb100097f2e9
	false	undefined	0							undefined	0	58e383a15ba4cb100097f5d3		false	402888	787	116	0	0	0	0	1	undefined	58e3820e5ba4cb100097f2e9
	false	undefined	0							undefined	0	58e383a25ba4cb100097f5d4		false	403508	788	116	0	0	0	0	1	undefined	58e3820e5ba4cb100097f2e9
	false	undefined	0							undefined	0	58e383a25ba4cb100097f5d5		false	404035	789	115	0	0	0	0	1	undefined	58e3820e5ba4cb100097f2e9
	false	undefined	0							undefined	0	58e383a35ba4cb100097f5d6		false	404569	790	113	0	0	0	0	1	undefined	58e3820e5ba4cb100097f2e9
	false	undefined	0							undefined	0	58e383a35ba4cb100097f5d7		false	405186	791	116	0	0	0	0	1	undefined	58e3820e5ba4cb100097f2e9
	false	undefined	0							undefined	0	58e383a45ba4cb100097f5d8		false	405707	792	118	0	0	0	0	1	undefined	58e3820e5ba4cb100097f2e9
	false	undefined	0							undefined	0	58e383a45ba4cb100097f5d9		false	406228	793	116	0	0	0	0	1	undefined	58e3820e5ba4cb100097f2e9
	false	undefined	0							undefined	0	58e383a55ba4cb100097f5da		false	406783	794	114	0	0	0	0	1	undefined	58e3820e5ba4cb100097f2e9
	false	undefined	0							undefined	0	58e383a55ba4cb100097f5db		false	407306	795	114	0	0	0	0	1	undefined	58e3820e5ba4cb100097f2e9
	false	undefined	0							undefined	0	58e383a65ba4cb100097f5dc		false	407842	796	115	0	0	0	0	1	undefined	58e3820e5ba4cb100097f2e9
	false	undefined	0							undefined	0	58e383a75ba4cb100097f5dd		false	408472	797	115	0	0	0	0	1	undefined	58e3820e5ba4cb100097f2e9
	false	undefined	0							undefined	0	58e383a75ba4cb100097f5de		false	408977	798	114	0	0	0	0	1	undefined	58e3820e5ba4cb100097f2e9
	false	undefined	0							undefined	0	58e383a85ba4cb100097f5df		false	409528	799	114	0	0	0	0	1	undefined	58e3820e5ba4cb100097f2e9
	false	undefined	0							undefined	0	58e383a85ba4cb100097f5e0		false	410059	800	114	0	0	0	0	1	undefined	58e3820e5ba4cb100097f2e9
	false	undefined	0							undefined	0	58e383a95ba4cb100097f5e1		false	410588	801	114	0	0	0	0	1	undefined	58e3820e5ba4cb100097f2e9
	false	undefined	0							undefined	0	58e383a95ba4cb100097f5e2		false	411122	802	115	0	0	0	0	1	undefined	58e3820e5ba4cb100097f2e9
	false	undefined	0							undefined	0	58e383aa5ba4cb100097f5e3		false	411642	803	116	0	0	0	0	1	undefined	58e3820e5ba4cb100097f2e9
	false	undefined	0							undefined	0	58e383aa5ba4cb100097f5e4		false	412169	804	115	0	0	0	0	1	undefined	58e3820e5ba4cb100097f2e9
	false	undefined	0							undefined	0	58e383ab5ba4cb100097f5e5		false	412720	805	116	0	0	0	0	1	undefined	58e3820e5ba4cb100097f2e9
	false	undefined	0							undefined	0	58e383ab5ba4cb100097f5e6		false	413260	806	117	0	0	0	0	1	undefined	58e3820e5ba4cb100097f2e9
	false	undefined	0							undefined	0	58e383ac5ba4cb100097f5e7		false	413780	807	119	0	0	0	0	1	undefined	58e3820e5ba4cb100097f2e9
	false	undefined	0							undefined	0	58e383ac5ba4cb100097f5e8		false	414332	808	116	0	0	0	0	1	undefined	58e3820e5ba4cb100097f2e9
	false	undefined	0							undefined	0	58e383ad5ba4cb100097f5e9		false	414845	809	115	0	0	0	0	1	undefined	58e3820e5ba4cb100097f2e9
	false	undefined	0							undefined	0	58e383ad5ba4cb100097f5ea		false	415380	810	115	0	0	0	0	1	undefined	58e3820e5ba4cb100097f2e9
	false	undefined	0							undefined	0	58e383ae5ba4cb100097f5eb		false	415889	811	114	0	0	0	0	1	undefined	58e3820e5ba4cb100097f2e9
	false	undefined	0							undefined	0	58e383ae5ba4cb100097f5ec		false	416397	812	111	0	0	0	0	1	undefined	58e3820e5ba4cb100097f2e9
	false	undefined	0							undefined	0	58e383af5ba4cb100097f5ed		true	416935	813	107	0	0	0	0	1	undefined	58e3820e5ba4cb100097f2e9
	false	undefined	0							undefined	0	58e383b05ba4cb100097f5ee		true	417478	814	-1	0	0	0	0	1	undefined	58e3820e5ba4cb100097f2e9
	false	undefined	0							undefined	0	58e383b05ba4cb100097f5ef		true	418010	815	-1	0	0	0	0	1	undefined	58e3820e5ba4cb100097f2e9
	false	undefined	0							undefined	0	58e383b15ba4cb100097f5f0		true	418521	816	-1	0	0	0	0	1	undefined	58e3820e5ba4cb100097f2e9
	false	undefined	0							undefined	0	58e383b15ba4cb100097f5f1		true	419061	820	-1	0	0	0	0	1	undefined	58e3820e5ba4cb100097f2e9
	false	undefined	0							undefined	0	58e383b25ba4cb100097f5f2		true	419552	821	-1	0	0	0	0	1	undefined	58e3820e5ba4cb100097f2e9
	false	undefined	0							undefined	0	58e383b25ba4cb100097f5f3		true	420060	822	0	0	0	0	0	1	undefined	58e3820e5ba4cb100097f2e9
	false	undefined	0							undefined	0	58e383b35ba4cb100097f5f4		true	420578	823	0	0	0	0	0	1	undefined	58e3820e5ba4cb100097f2e9
	false	undefined	0							undefined	0	58e383b35ba4cb100097f5f5		true	421065	824	0	0	0	0	0	1	undefined	58e3820e5ba4cb100097f2e9
	false	undefined	0							undefined	0	58e383b45ba4cb100097f5f6		true	421614	825	0	0	0	0	0	1	undefined	58e3820e5ba4cb100097f2e9
	false	undefined	0							undefined	0	58e383b45ba4cb100097f5f7		true	422083	826	-1	0	0	0	0	1	undefined	58e3820e5ba4cb100097f2e9
	false	undefined	0							undefined	0	58e383b55ba4cb100097f5f8		true	422606	827	-1	0	0	0	0	1	undefined	58e3820e5ba4cb100097f2e9
	false	undefined	0							undefined	0	58e383b55ba4cb100097f5f9		true	423087	828	-1	0	0	0	0	1	undefined	58e3820e5ba4cb100097f2e9
	false	undefined	0							undefined	0	58e383b65ba4cb100097f5fa		true	423659	829	-1	0	0	0	0	1	undefined	58e3820e5ba4cb100097f2e9
	false	undefined	0							undefined	0	58e383b65ba4cb100097f5fb		true	424143	830	-1	0	0	0	0	1	undefined	58e3820e5ba4cb100097f2e9
	false	undefined	0							undefined	0	58e383b75ba4cb100097f5fc		true	424680	831	-1	0	0	0	0	1	undefined	58e3820e5ba4cb100097f2e9
	false	undefined	0							undefined	0	58e383b75ba4cb100097f5fd		true	425210	832	-1	0	0	0	0	1	undefined	58e3820e5ba4cb100097f2e9
	false	undefined	0							undefined	0	58e383b85ba4cb100097f5fe		true	425679	833	-1	0	0	0	0	1	undefined	58e3820e5ba4cb100097f2e9
	false	undefined	0							undefined	0	58e383b85ba4cb100097f5ff		true	426309	834	-1	0	0	0	0	1	undefined	58e3820e5ba4cb100097f2e9
	false	undefined	0							undefined	0	58e383b95ba4cb100097f600		true	426809	835	-1	0	0	0	0	1	undefined	58e3820e5ba4cb100097f2e9
	false	undefined	0							undefined	0	58e383b95ba4cb100097f601		true	427300	836	-1	0	0	0	0	1	undefined	58e3820e5ba4cb100097f2e9
	false	undefined	0							undefined	0	58e383ba5ba4cb100097f602		true	427804	837	-1	0	0	0	0	1	undefined	58e3820e5ba4cb100097f2e9
	false	undefined	0							undefined	0	58e383ba5ba4cb100097f603		true	428360	838	77	0	0	0	0	1	undefined	58e3820e5ba4cb100097f2e9
	false	undefined	0							undefined	0	58e383bb5ba4cb100097f604		true	428890	839	79	0	0	0	0	1	undefined	58e3820e5ba4cb100097f2e9
	false	undefined	0							undefined	0	58e383bc5ba4cb100097f605		true	429425	843	-1	0	0	0	0	1	undefined	58e3820e5ba4cb100097f2e9
	false	undefined	0							undefined	0	58e383bc5ba4cb100097f606		false	429884	844	-1	0	0	0	0	1	undefined	58e3820e5ba4cb100097f2e9
	false	undefined	0							undefined	0	58e383bc5ba4cb100097f607		false	430423	845	-1	0	0	0	0	1	undefined	58e3820e5ba4cb100097f2e9
	false	undefined	0							undefined	0	58e383bd5ba4cb100097f608		true	430956	846	83	0	0	0	0	1	undefined	58e3820e5ba4cb100097f2e9
	false	undefined	0							undefined	0	58e383be5ba4cb100097f609		true	431490	847	-1	0	0	0	0	1	undefined	58e3820e5ba4cb100097f2e9
	false	undefined	0							undefined	0	58e383be5ba4cb100097f60a		true	431978	848	-1	0	0	0	0	1	undefined	58e3820e5ba4cb100097f2e9
	false	undefined	0							undefined	0	58e383bf5ba4cb100097f60b		true	432567	849	-1	0	0	0	0	1	undefined	58e3820e5ba4cb100097f2e9
	false	undefined	0							undefined	0	58e383bf5ba4cb100097f60c		true	433082	850	-1	0	0	0	0	1	undefined	58e3820e5ba4cb100097f2e9
	false	undefined	0							undefined	0	58e383c05ba4cb100097f60d		true	433531	851	-1	0	0	0	0	1	undefined	58e3820e5ba4cb100097f2e9
	false	undefined	0							undefined	0	58e383c05ba4cb100097f60e		false	434100	852	-1	0	0	0	0	1	undefined	58e3820e5ba4cb100097f2e9
	false	undefined	0							undefined	0	58e383c15ba4cb100097f60f		false	434582	853	-1	0	0	0	0	1	undefined	58e3820e5ba4cb100097f2e9
	false	undefined	0							undefined	0	58e383c15ba4cb100097f610		false	435169	854	-1	0	0	0	0	1	undefined	58e3820e5ba4cb100097f2e9
	false	undefined	0							undefined	0	58e383c25ba4cb100097f611		false	435687	855	-1	0	0	0	0	1	undefined	58e3820e5ba4cb100097f2e9
	false	undefined	0							undefined	0	58e383c25ba4cb100097f612		false	436117	856	-1	0	0	0	0	1	undefined	58e3820e5ba4cb100097f2e9
	false	undefined	0							undefined	0	58e383c35ba4cb100097f613		false	436700	857	-1	0	0	0	0	1	undefined	58e3820e5ba4cb100097f2e9
	false	undefined	0							undefined	0	58e383c35ba4cb100097f614		false	437242	858	-1	0	0	0	0	1	undefined	58e3820e5ba4cb100097f2e9
	false	undefined	0							undefined	0	58e383c45ba4cb100097f615		false	437779	859	-1	0	0	0	0	1	undefined	58e3820e5ba4cb100097f2e9
	false	undefined	0							undefined	0	58e383c45ba4cb100097f616		false	438290	860	-1	0	0	0	0	1	undefined	58e3820e5ba4cb100097f2e9
	false	undefined	0							undefined	0	58e383c55ba4cb100097f617		false	438794	861	-1	0	0	0	0	1	undefined	58e3820e5ba4cb100097f2e9
	false	undefined	0							undefined	0	58e383c55ba4cb100097f618		false	439373	862	-1	0	0	0	0	1	undefined	58e3820e5ba4cb100097f2e9
	false	undefined	0							undefined	0	58e383c65ba4cb100097f619		false	439910	863	-1	0	0	0	0	1	undefined	58e3820e5ba4cb100097f2e9
	false	undefined	0							undefined	0	58e383c75ba4cb100097f61a		false	440444	864	-1	0	0	0	0	1	undefined	58e3820e5ba4cb100097f2e9
	false	undefined	0							undefined	0	58e383c75ba4cb100097f61b		false	440967	865	-1	0	0	0	0	1	undefined	58e3820e5ba4cb100097f2e9
	false	undefined	0							undefined	0	58e383c85ba4cb100097f61c		false	441521	866	-1	0	0	0	0	1	undefined	58e3820e5ba4cb100097f2e9
	false	undefined	0							undefined	0	58e383c85ba4cb100097f61d		false	441988	867	0	0	0	0	0	1	undefined	58e3820e5ba4cb100097f2e9
	false	undefined	0							undefined	0	58e383c95ba4cb100097f61e		false	442521	868	0	0	0	0	0	1	undefined	58e3820e5ba4cb100097f2e9
	false	undefined	0							undefined	0	58e383c95ba4cb100097f61f		false	443051	869	0	0	0	0	0	1	undefined	58e3820e5ba4cb100097f2e9
	false	undefined	0							undefined	0	58e383ca5ba4cb100097f620		false	443640	870	-1	0	0	0	0	1	undefined	58e3820e5ba4cb100097f2e9
	false	undefined	0							undefined	0	58e383ca5ba4cb100097f621		false	444187	871	-1	0	0	0	0	1	undefined	58e3820e5ba4cb100097f2e9
	false	undefined	0							undefined	0	58e383cb5ba4cb100097f622		false	444725	872	-1	0	0	0	0	1	undefined	58e3820e5ba4cb100097f2e9
	false	undefined	0							undefined	0	58e383cb5ba4cb100097f623		false	445246	873	-1	0	0	0	0	1	undefined	58e3820e5ba4cb100097f2e9
	false	undefined	0							undefined	0	58e383cc5ba4cb100097f624		false	445801	874	-1	0	0	0	0	1	undefined	58e3820e5ba4cb100097f2e9
	false	undefined	0							undefined	0	58e383cc5ba4cb100097f625		false	446385	875	-1	0	0	0	0	1	undefined	58e3820e5ba4cb100097f2e9
	false	undefined	0							undefined	0	58e383cd5ba4cb100097f626		true	446863	876	-1	0	0	0	0	1	undefined	58e3820e5ba4cb100097f2e9
	false	undefined	0							undefined	0	58e383cd5ba4cb100097f627		true	447391	877	-1	0	0	0	0	1	undefined	58e3820e5ba4cb100097f2e9
	false	undefined	0							undefined	0	58e383ce5ba4cb100097f628		true	447928	878	-1	0	0	0	0	1	undefined	58e3820e5ba4cb100097f2e9
	false	undefined	0							undefined	0	58e383cf5ba4cb100097f629		true	448462	879	119	0	0	0	0	1	undefined	58e3820e5ba4cb100097f2e9
	false	undefined	0							undefined	0	58e383cf5ba4cb100097f62a		false	448992	880	117	0	0	0	0	1	undefined	58e3820e5ba4cb100097f2e9
	false	undefined	0							undefined	0	58e383d05ba4cb100097f62b		false	449523	881	113	0	0	0	0	1	undefined	58e3820e5ba4cb100097f2e9
	false	undefined	0							undefined	0	58e383d05ba4cb100097f62c		false	449984	885	119	0	0	0	0	1	undefined	58e3820e5ba4cb100097f2e9
	false	undefined	0							undefined	0	58e383d15ba4cb100097f62d		false	450607	886	119	0	0	0	0	1	undefined	58e3820e5ba4cb100097f2e9
	false	undefined	0							undefined	0	58e383d15ba4cb100097f62e		false	451133	887	119	0	0	0	0	1	undefined	58e3820e5ba4cb100097f2e9
	false	undefined	0							undefined	0	58e383d25ba4cb100097f62f		false	451674	888	118	0	0	0	0	1	undefined	58e3820e5ba4cb100097f2e9
	false	undefined	0							undefined	0	58e383d25ba4cb100097f630		false	452206	889	119	0	0	0	0	1	undefined	58e3820e5ba4cb100097f2e9
	false	undefined	0							undefined	0	58e383d35ba4cb100097f631		false	452664	890	116	0	0	0	0	1	undefined	58e3820e5ba4cb100097f2e9
	false	undefined	0							undefined	0	58e383d35ba4cb100097f632		false	453192	891	118	0	0	0	0	1	undefined	58e3820e5ba4cb100097f2e9
	false	undefined	0							undefined	0	58e383d45ba4cb100097f633		false	453821	892	119	0	0	0	0	1	undefined	58e3820e5ba4cb100097f2e9
	false	undefined	0							undefined	0	58e383d45ba4cb100097f634		false	454333	893	118	0	0	0	0	1	undefined	58e3820e5ba4cb100097f2e9
	false	undefined	0							undefined	0	58e383d55ba4cb100097f635		false	454865	894	116	0	0	0	0	1	undefined	58e3820e5ba4cb100097f2e9
	false	undefined	0							undefined	0	58e383d55ba4cb100097f636		false	455411	895	113	0	0	0	0	1	undefined	58e3820e5ba4cb100097f2e9
	false	undefined	0							undefined	0	58e383d65ba4cb100097f637		false	455923	896	113	0	0	0	0	1	undefined	58e3820e5ba4cb100097f2e9
	false	undefined	0							undefined	0	58e383d75ba4cb100097f638		false	456484	897	111	0	0	0	0	1	undefined	58e3820e5ba4cb100097f2e9
	false	undefined	0							undefined	0	58e383d75ba4cb100097f639		false	457075	898	111	0	0	0	0	1	undefined	58e3820e5ba4cb100097f2e9
	false	undefined	0							undefined	0	58e383d85ba4cb100097f63a		false	457608	899	112	0	0	0	0	1	undefined	58e3820e5ba4cb100097f2e9
	false	undefined	0							undefined	0	58e383d85ba4cb100097f63b		false	458056	900	110	0	0	0	0	1	undefined	58e3820e5ba4cb100097f2e9
	false	undefined	0							undefined	0	58e383d95ba4cb100097f63c		false	458692	901	111	0	0	0	0	1	undefined	58e3820e5ba4cb100097f2e9
	false	undefined	0							undefined	0	58e383d95ba4cb100097f63d		false	459215	902	113	0	0	0	0	1	undefined	58e3820e5ba4cb100097f2e9
	false	undefined	0							undefined	0	58e383da5ba4cb100097f63e		false	459741	903	114	0	0	0	0	1	undefined	58e3820e5ba4cb100097f2e9
	false	undefined	0							undefined	0	58e383da5ba4cb100097f63f		false	460383	904	111	0	0	0	0	1	undefined	58e3820e5ba4cb100097f2e9
	false	undefined	0							undefined	0	58e383db5ba4cb100097f640		false	460869	905	111	0	0	0	0	1	undefined	58e3820e5ba4cb100097f2e9
	false	undefined	0							undefined	0	58e383db5ba4cb100097f641		false	461381	906	112	0	0	0	0	1	undefined	58e3820e5ba4cb100097f2e9
	false	undefined	0							undefined	0	58e383dc5ba4cb100097f642		false	461951	907	110	0	0	0	0	1	undefined	58e3820e5ba4cb100097f2e9
	false	undefined	0							undefined	0	58e383dd5ba4cb100097f643		false	462480	908	114	0	0	0	0	1	undefined	58e3820e5ba4cb100097f2e9
	false	undefined	0							undefined	0	58e383dd5ba4cb100097f644		false	463023	909	117	0	0	0	0	1	undefined	58e3820e5ba4cb100097f2e9
	false	undefined	0							undefined	0	58e383de5ba4cb100097f645		false	463555	910	117	0	0	0	0	1	undefined	58e3820e5ba4cb100097f2e9
	false	undefined	0							undefined	0	58e383de5ba4cb100097f646		false	464100	911	114	0	0	0	0	1	undefined	58e3820e5ba4cb100097f2e9
	false	undefined	0							undefined	0	58e383df5ba4cb100097f647		false	464590	912	115	0	0	0	0	1	undefined	58e3820e5ba4cb100097f2e9
	false	undefined	0							undefined	0	58e383df5ba4cb100097f648		false	465164	913	115	0	0	0	0	1	undefined	58e3820e5ba4cb100097f2e9
	false	undefined	0							undefined	0	58e383e05ba4cb100097f649		false	465739	914	115	0	0	0	0	1	undefined	58e3820e5ba4cb100097f2e9
	false	undefined	0							undefined	0	58e383e05ba4cb100097f64a		false	466283	915	116	0	0	0	0	1	undefined	58e3820e5ba4cb100097f2e9
	false	undefined	0							undefined	0	58e383e15ba4cb100097f64b		false	466826	916	113	0	0	0	0	1	undefined	58e3820e5ba4cb100097f2e9
	false	undefined	0							undefined	0	58e383e15ba4cb100097f64c		false	467362	917	113	0	0	0	0	1	undefined	58e3820e5ba4cb100097f2e9
	false	undefined	0							undefined	0	58e383e25ba4cb100097f64d		false	467911	918	111	0	0	0	0	1	undefined	58e3820e5ba4cb100097f2e9
	false	undefined	0							undefined	0	58e383e35ba4cb100097f64e		false	468433	919	113	0	0	0	0	1	undefined	58e3820e5ba4cb100097f2e9
	false	undefined	0							undefined	0	58e383e35ba4cb100097f64f		false	468973	920	113	0	0	0	0	1	undefined	58e3820e5ba4cb100097f2e9
	false	undefined	0							undefined	0	58e383e45ba4cb100097f650		false	469499	921	112	0	0	0	0	1	undefined	58e3820e5ba4cb100097f2e9
	false	undefined	0							undefined	0	58e383e45ba4cb100097f651		false	470030	922	114	0	0	0	0	1	undefined	58e3820e5ba4cb100097f2e9
	false	undefined	0							undefined	0	58e383e55ba4cb100097f652		false	470570	923	113	0	0	0	0	1	undefined	58e3820e5ba4cb100097f2e9
	false	undefined	0							undefined	0	58e383e55ba4cb100097f653		false	471054	924	114	0	0	0	0	1	undefined	58e3820e5ba4cb100097f2e9
	false	undefined	0							undefined	0	58e383e65ba4cb100097f654		false	471641	925	113	0	0	0	0	1	undefined	58e3820e5ba4cb100097f2e9
	false	undefined	0							undefined	0	58e383e65ba4cb100097f655		false	472160	926	114	0	0	0	0	1	undefined	58e3820e5ba4cb100097f2e9
	false	undefined	0							undefined	0	58e383e75ba4cb100097f656		false	472652	927	114	0	0	0	0	1	undefined	58e3820e5ba4cb100097f2e9
	false	undefined	0							undefined	0	58e383e75ba4cb100097f657		false	473182	928	115	0	0	0	0	1	undefined	58e3820e5ba4cb100097f2e9
	false	undefined	0							undefined	0	58e383e85ba4cb100097f658		false	473707	929	117	0	0	0	0	1	undefined	58e3820e5ba4cb100097f2e9
	false	undefined	0							undefined	0	58e383e85ba4cb100097f659		false	474250	930	113	0	0	0	0	1	undefined	58e3820e5ba4cb100097f2e9
	false	undefined	0							undefined	0	58e383e95ba4cb100097f65a		false	474846	931	114	0	0	0	0	1	undefined	58e3820e5ba4cb100097f2e9
	false	undefined	0							undefined	0	58e383e95ba4cb100097f65b		false	475331	932	113	0	0	0	0	1	undefined	58e3820e5ba4cb100097f2e9
	false	undefined	0							undefined	0	58e383ea5ba4cb100097f65c		false	475857	933	115	0	0	0	0	1	undefined	58e3820e5ba4cb100097f2e9
	false	undefined	0							undefined	0	58e383eb5ba4cb100097f65d		false	476450	934	113	0	0	0	0	1	undefined	58e3820e5ba4cb100097f2e9
	false	undefined	0							undefined	0	58e383eb5ba4cb100097f65e		false	476975	935	111	0	0	0	0	1	undefined	58e3820e5ba4cb100097f2e9
	false	undefined	0							undefined	0	58e383ec5ba4cb100097f65f		false	477529	936	112	0	0	0	0	1	undefined	58e3820e5ba4cb100097f2e9
	false	undefined	0							undefined	0	58e383ec5ba4cb100097f660		false	478022	937	114	0	0	0	0	1	undefined	58e3820e5ba4cb100097f2e9
	false	undefined	0							undefined	0	58e383ed5ba4cb100097f661		false	478593	938	114	0	0	0	0	1	undefined	58e3820e5ba4cb100097f2e9
	false	undefined	0							undefined	0	58e383ed5ba4cb100097f662		false	479062	939	112	0	0	0	0	1	undefined	58e3820e5ba4cb100097f2e9
	false	undefined	0							undefined	0	58e383ee5ba4cb100097f663		false	479665	940	112	0	0	0	0	1	undefined	58e3820e5ba4cb100097f2e9
	false	undefined	0							undefined	0	58e383ee5ba4cb100097f664		false	480172	941	113	0	0	0	0	1	undefined	58e3820e5ba4cb100097f2e9
	false	undefined	0							undefined	0	58e383ef5ba4cb100097f665		false	480661	942	114	0	0	0	0	1	undefined	58e3820e5ba4cb100097f2e9
	false	undefined	0							undefined	0	58e383ef5ba4cb100097f666		false	481259	943	115	0	0	0	0	1	undefined	58e3820e5ba4cb100097f2e9
	false	undefined	0							undefined	0	58e383f05ba4cb100097f667		false	481725	944	114	0	0	0	0	1	undefined	58e3820e5ba4cb100097f2e9
	false	undefined	0							undefined	0	58e383f05ba4cb100097f668		false	482278	945	115	0	0	0	0	1	undefined	58e3820e5ba4cb100097f2e9
	false	undefined	0							undefined	0	58e383f15ba4cb100097f669		false	482901	946	116	0	0	0	0	1	undefined	58e3820e5ba4cb100097f2e9
	false	undefined	0							undefined	0	58e383f15ba4cb100097f66a		false	483383	947	116	0	0	0	0	1	undefined	58e3820e5ba4cb100097f2e9
	false	undefined	0							undefined	0	58e383f25ba4cb100097f66b		false	483939	948	118	0	0	0	0	1	undefined	58e3820e5ba4cb100097f2e9
	false	undefined	0							undefined	0	58e383f35ba4cb100097f66c		false	484472	949	115	0	0	0	0	1	undefined	58e3820e5ba4cb100097f2e9
	false	undefined	0							undefined	0	58e383f35ba4cb100097f66d		false	485084	950	116	0	0	0	0	1	undefined	58e3820e5ba4cb100097f2e9
	false	undefined	0							undefined	0	58e383f45ba4cb100097f66e		false	485679	951	119	0	0	0	0	1	undefined	58e3820e5ba4cb100097f2e9
	false	undefined	0							undefined	0	58e383f45ba4cb100097f66f		false	486194	952	118	0	0	0	0	1	undefined	58e3820e5ba4cb100097f2e9
	false	undefined	0							undefined	0	58e383f55ba4cb100097f670		false	486659	953	116	0	0	0	0	1	undefined	58e3820e5ba4cb100097f2e9
	false	undefined	0							undefined	0	58e383f55ba4cb100097f671		false	487264	954	120	0	0	0	0	1	undefined	58e3820e5ba4cb100097f2e9
	false	undefined	0							undefined	0	58e383f65ba4cb100097f672		false	487802	955	121	0	0	0	0	1	undefined	58e3820e5ba4cb100097f2e9
	false	undefined	0							undefined	0	58e383f65ba4cb100097f673		false	488297	956	119	0	0	0	0	1	undefined	58e3820e5ba4cb100097f2e9
	false	undefined	0							undefined	0	58e383f75ba4cb100097f674		false	488859	957	115	0	0	0	0	1	undefined	58e3820e5ba4cb100097f2e9
	false	undefined	0							undefined	0	58e383f75ba4cb100097f675		false	489398	958	116	0	0	0	0	1	undefined	58e3820e5ba4cb100097f2e9
	false	undefined	0							undefined	0	58e383f85ba4cb100097f676		false	489941	959	118	0	0	0	0	1	undefined	58e3820e5ba4cb100097f2e9
	false	undefined	0							undefined	0	58e383f95ba4cb100097f677		false	490474	960	114	0	0	0	0	1	undefined	58e3820e5ba4cb100097f2e9
	false	undefined	0							undefined	0	58e383f95ba4cb100097f678		false	490939	961	111	0	0	0	0	1	undefined	58e3820e5ba4cb100097f2e9
	false	undefined	0							undefined	0	58e383fa5ba4cb100097f679		false	491567	962	111	0	0	0	0	1	undefined	58e3820e5ba4cb100097f2e9
	false	undefined	0							undefined	0	58e383fa5ba4cb100097f67a		false	492163	963	113	0	0	0	0	1	undefined	58e3820e5ba4cb100097f2e9
	false	undefined	0							undefined	0	58e383fb5ba4cb100097f67b		false	492642	964	115	0	0	0	0	1	undefined	58e3820e5ba4cb100097f2e9
	false	undefined	0							undefined	0	58e383fb5ba4cb100097f67c		false	493165	965	116	0	0	0	0	1	undefined	58e3820e5ba4cb100097f2e9
	false	undefined	0							undefined	0	58e383fc5ba4cb100097f67d		false	493735	966	115	0	0	0	0	1	undefined	58e3820e5ba4cb100097f2e9
	false	undefined	0							undefined	0	58e383fc5ba4cb100097f67e		false	494284	967	116	0	0	0	0	1	undefined	58e3820e5ba4cb100097f2e9
	false	undefined	0							undefined	0	58e383fd5ba4cb100097f67f		false	494817	968	116	0	0	0	0	1	undefined	58e3820e5ba4cb100097f2e9
	false	undefined	0							undefined	0	58e383fd5ba4cb100097f680		false	495353	969	113	0	0	0	0	1	undefined	58e3820e5ba4cb100097f2e9
	false	undefined	0							undefined	0	58e383fe5ba4cb100097f681		false	495956	970	112	0	0	0	0	1	undefined	58e3820e5ba4cb100097f2e9
	false	undefined	0							undefined	0	58e383fe5ba4cb100097f682		false	496417	971	110	0	0	0	0	1	undefined	58e3820e5ba4cb100097f2e9
	false	undefined	0							undefined	0	58e383ff5ba4cb100097f683		false	497015	972	114	0	0	0	0	1	undefined	58e3820e5ba4cb100097f2e9
	false	undefined	0							undefined	0	58e384005ba4cb100097f684		false	497560	973	115	0	0	0	0	1	undefined	58e3820e5ba4cb100097f2e9
	false	undefined	0							undefined	0	58e384005ba4cb100097f685		false	498094	974	116	0	0	0	0	1	undefined	58e3820e5ba4cb100097f2e9
	false	undefined	0							undefined	0	58e384015ba4cb100097f686		false	498560	975	116	0	0	0	0	1	undefined	58e3820e5ba4cb100097f2e9
	false	undefined	0							undefined	0	58e384015ba4cb100097f687		false	499161	976	114	0	0	0	0	1	undefined	58e3820e5ba4cb100097f2e9
	false	undefined	0							undefined	0	58e384025ba4cb100097f688		false	499691	977	115	0	0	0	0	1	undefined	58e3820e5ba4cb100097f2e9
	false	undefined	0							undefined	0	58e384025ba4cb100097f689		false	500188	978	113	0	0	0	0	1	undefined	58e3820e5ba4cb100097f2e9
	false	undefined	0							undefined	0	58e384035ba4cb100097f68a		false	500752	979	116	0	0	0	0	1	undefined	58e3820e5ba4cb100097f2e9
	false	undefined	0							undefined	0	58e384035ba4cb100097f68b		false	501289	980	117	0	0	0	0	1	undefined	58e3820e5ba4cb100097f2e9
	false	undefined	0							undefined	0	58e384045ba4cb100097f68c		false	501821	981	117	0	0	0	0	1	undefined	58e3820e5ba4cb100097f2e9
	false	undefined	0							undefined	0	58e384045ba4cb100097f68d		false	502361	982	118	0	0	0	0	1	undefined	58e3820e5ba4cb100097f2e9
	false	undefined	0							undefined	0	58e384055ba4cb100097f68e		false	502889	983	120	0	0	0	0	1	undefined	58e3820e5ba4cb100097f2e9
	false	undefined	0							undefined	0	58e384055ba4cb100097f68f		false	503406	984	119	0	0	0	0	1	undefined	58e3820e5ba4cb100097f2e9
	false	undefined	0							undefined	0	58e384065ba4cb100097f690		false	503957	985	117	0	0	0	0	1	undefined	58e3820e5ba4cb100097f2e9
	false	undefined	0							undefined	0	58e384075ba4cb100097f691		false	504501	986	116	0	0	0	0	1	undefined	58e3820e5ba4cb100097f2e9
	false	undefined	0							undefined	0	58e384075ba4cb100097f692		false	504984	987	115	0	0	0	0	1	undefined	58e3820e5ba4cb100097f2e9
	false	undefined	0							undefined	0	58e384085ba4cb100097f693		false	505570	988	116	0	0	0	0	1	undefined	58e3820e5ba4cb100097f2e9
	false	undefined	0							undefined	0	58e384085ba4cb100097f694		false	506110	989	115	0	0	0	0	1	undefined	58e3820e5ba4cb100097f2e9
	false	undefined	0							undefined	0	58e384095ba4cb100097f695		false	506566	990	113	0	0	0	0	1	undefined	58e3820e5ba4cb100097f2e9
	false	undefined	0							undefined	0	58e384095ba4cb100097f696		false	507174	991	115	0	0	0	0	1	undefined	58e3820e5ba4cb100097f2e9
	false	undefined	0							undefined	0	58e3840a5ba4cb100097f697		false	507706	992	116	0	0	0	0	1	undefined	58e3820e5ba4cb100097f2e9
	false	undefined	0							undefined	0	58e3840a5ba4cb100097f698		false	508249	993	117	0	0	0	0	1	undefined	58e3820e5ba4cb100097f2e9
	false	undefined	0							undefined	0	58e3840b5ba4cb100097f699		false	508782	994	114	0	0	0	0	1	undefined	58e3820e5ba4cb100097f2e9
	false	undefined	0							undefined	0	58e3840b5ba4cb100097f69a		false	509316	995	116	0	0	0	0	1	undefined	58e3820e5ba4cb100097f2e9
	false	undefined	0							undefined	0	58e3840c5ba4cb100097f69b		false	509849	996	119	0	0	0	0	1	undefined	58e3820e5ba4cb100097f2e9
	false	undefined	0							undefined	0	58e3840c5ba4cb100097f69c		false	510382	997	116	0	0	0	0	1	undefined	58e3820e5ba4cb100097f2e9
	false	undefined	0							undefined	0	58e3840d5ba4cb100097f69d		false	510905	998	115	0	0	0	0	1	undefined	58e3820e5ba4cb100097f2e9
	false	undefined	0							undefined	0	58e3840d5ba4cb100097f69e		false	511407	999	116	0	0	0	0	1	undefined	58e3820e5ba4cb100097f2e9
	false	undefined	0							undefined	0	58e3840e5ba4cb100097f69f		false	511980	1000	118	0	0	0	0	1	undefined	58e3820e5ba4cb100097f2e9
	false	undefined	0							undefined	0	58e3840f5ba4cb100097f6a0		false	512513	1001	117	0	0	0	0	1	undefined	58e3820e5ba4cb100097f2e9
	false	undefined	0							undefined	0	58e3840f5ba4cb100097f6a1		false	513046	1002	116	0	0	0	0	1	undefined	58e3820e5ba4cb100097f2e9
	false	undefined	0							undefined	0	58e384105ba4cb100097f6a2		false	513578	1003	116	0	0	0	0	1	undefined	58e3820e5ba4cb100097f2e9
	false	undefined	0							undefined	0	58e384105ba4cb100097f6a3		false	514111	1004	117	0	0	0	0	1	undefined	58e3820e5ba4cb100097f2e9
	false	undefined	0							undefined	0	58e384115ba4cb100097f6a4		false	514579	1005	114	0	0	0	0	1	undefined	58e3820e5ba4cb100097f2e9
	false	undefined	0							undefined	0	58e384115ba4cb100097f6a5		false	515193	1006	115	0	0	0	0	1	undefined	58e3820e5ba4cb100097f2e9
	false	undefined	0							undefined	0	58e384125ba4cb100097f6a6		false	515733	1007	116	0	0	0	0	1	undefined	58e3820e5ba4cb100097f2e9
	false	undefined	0							undefined	0	58e384125ba4cb100097f6a7		false	516260	1008	116	0	0	0	0	1	undefined	58e3820e5ba4cb100097f2e9
	false	undefined	0							undefined	0	58e384135ba4cb100097f6a8		false	516791	1009	116	0	0	0	0	1	undefined	58e3820e5ba4cb100097f2e9
	false	undefined	0							undefined	0	58e384135ba4cb100097f6a9		false	517323	1010	116	0	0	0	0	1	undefined	58e3820e5ba4cb100097f2e9
	false	undefined	0							undefined	0	58e384145ba4cb100097f6aa		false	517879	1011	116	0	0	0	0	1	undefined	58e3820e5ba4cb100097f2e9
	false	undefined	0							undefined	0	58e384145ba4cb100097f6ab		false	518388	1012	114	0	0	0	0	1	undefined	58e3820e5ba4cb100097f2e9
	false	undefined	0							undefined	0	58e384155ba4cb100097f6ac		false	518850	1013	113	0	0	0	0	1	undefined	58e3820e5ba4cb100097f2e9
	false	undefined	0							undefined	0	58e384155ba4cb100097f6ad		false	519388	1014	115	0	0	0	0	1	undefined	58e3820e5ba4cb100097f2e9
	false	undefined	0							undefined	0	58e384165ba4cb100097f6ae		false	519882	1015	114	0	0	0	0	1	undefined	58e3820e5ba4cb100097f2e9
	false	undefined	0							undefined	0	58e384175ba4cb100097f6af		false	520475	1016	113	0	0	0	0	1	undefined	58e3820e5ba4cb100097f2e9
	false	undefined	0							undefined	0	58e384175ba4cb100097f6b0		false	520991	1017	115	0	0	0	0	1	undefined	58e3820e5ba4cb100097f2e9
	false	undefined	0							undefined	0	58e384185ba4cb100097f6b1		false	521536	1018	116	0	0	0	0	1	undefined	58e3820e5ba4cb100097f2e9
	false	undefined	0							undefined	0	58e384185ba4cb100097f6b2		false	522068	1019	118	0	0	0	0	1	undefined	58e3820e5ba4cb100097f2e9
	false	undefined	0							undefined	0	58e384195ba4cb100097f6b3		false	522667	1020	116	0	0	0	0	1	undefined	58e3820e5ba4cb100097f2e9
	false	undefined	0							undefined	0	58e384195ba4cb100097f6b4		false	523200	1021	117	0	0	0	0	1	undefined	58e3820e5ba4cb100097f2e9
	false	undefined	0							undefined	0	58e3841a5ba4cb100097f6b5		false	523690	1022	117	0	0	0	0	1	undefined	58e3820e5ba4cb100097f2e9
	false	undefined	0							undefined	0	58e3841a5ba4cb100097f6b6		false	524220	1023	117	0	0	0	0	1	undefined	58e3820e5ba4cb100097f2e9
	false	undefined	0							undefined	0	58e3841b5ba4cb100097f6b7		false	524692	1024	117	0	0	0	0	1	undefined	58e3820e5ba4cb100097f2e9
	false	undefined	0							undefined	0	58e3841b5ba4cb100097f6b8		false	525274	1025	117	0	0	0	0	1	undefined	58e3820e5ba4cb100097f2e9
	false	undefined	0							undefined	0	58e3841c5ba4cb100097f6b9		false	525813	1026	118	0	0	0	0	1	undefined	58e3820e5ba4cb100097f2e9
	false	undefined	0							undefined	0	58e3841c5ba4cb100097f6ba		false	526345	1027	116	0	0	0	0	1	undefined	58e3820e5ba4cb100097f2e9
	false	undefined	0							undefined	0	58e3841d5ba4cb100097f6bb		false	526820	1028	114	0	0	0	0	1	undefined	58e3820e5ba4cb100097f2e9
	false	undefined	0							undefined	0	58e3841e5ba4cb100097f6bc		false	527428	1029	114	0	0	0	0	1	undefined	58e3820e5ba4cb100097f2e9
	false	undefined	0							undefined	0	58e3841e5ba4cb100097f6bd		false	527941	1030	115	0	0	0	0	1	undefined	58e3820e5ba4cb100097f2e9
	false	undefined	0							undefined	0	58e3841e5ba4cb100097f6be		false	528411	1031	114	0	0	0	0	1	undefined	58e3820e5ba4cb100097f2e9
	false	undefined	0							undefined	0	58e3841f5ba4cb100097f6bf		false	529034	1032	115	0	0	0	0	1	undefined	58e3820e5ba4cb100097f2e9
	false	undefined	0							undefined	0	58e384205ba4cb100097f6c0		false	529617	1033	117	0	0	0	0	1	undefined	58e3820e5ba4cb100097f2e9
	false	undefined	0							undefined	0	58e384205ba4cb100097f6c1		false	530169	1034	118	0	0	0	0	1	undefined	58e3820e5ba4cb100097f2e9
	false	undefined	0							undefined	0	58e384215ba4cb100097f6c2		false	530691	1035	117	0	0	0	0	1	undefined	58e3820e5ba4cb100097f2e9
	false	undefined	0							undefined	0	58e384215ba4cb100097f6c3		false	531223	1036	119	0	0	0	0	1	undefined	58e3820e5ba4cb100097f2e9
	false	undefined	0							undefined	0	58e384225ba4cb100097f6c4		false	531756	1037	122	0	0	0	0	1	undefined	58e3820e5ba4cb100097f2e9
	false	undefined	0							undefined	0	58e384225ba4cb100097f6c5		false	532292	1038	117	0	0	0	0	1	undefined	58e3820e5ba4cb100097f2e9
	false	undefined	0							undefined	0	58e384235ba4cb100097f6c6		false	532896	1039	114	0	0	0	0	1	undefined	58e3820e5ba4cb100097f2e9
	false	undefined	0							undefined	0	58e384235ba4cb100097f6c7		false	533356	1040	112	0	0	0	0	1	undefined	58e3820e5ba4cb100097f2e9
	false	undefined	0							undefined	0	58e384245ba4cb100097f6c8		false	533891	1041	113	0	0	0	0	1	undefined	58e3820e5ba4cb100097f2e9
	false	undefined	0							undefined	0	58e384255ba4cb100097f6c9		false	534513	1042	114	0	0	0	0	1	undefined	58e3820e5ba4cb100097f2e9
	false	undefined	0							undefined	0	58e384255ba4cb100097f6ca		false	535036	1043	116	0	0	0	0	1	undefined	58e3820e5ba4cb100097f2e9
	false	undefined	0							undefined	0	58e384265ba4cb100097f6cb		false	535564	1044	119	0	0	0	0	1	undefined	58e3820e5ba4cb100097f2e9
	false	undefined	0							undefined	0	58e384265ba4cb100097f6cc		false	536088	1045	117	0	0	0	0	1	undefined	58e3820e5ba4cb100097f2e9
	false	undefined	0							undefined	0	58e384275ba4cb100097f6cd		false	536623	1046	119	0	0	0	0	1	undefined	58e3820e5ba4cb100097f2e9
	false	undefined	0							undefined	0	58e384275ba4cb100097f6ce		false	537173	1047	118	0	0	0	0	1	undefined	58e3820e5ba4cb100097f2e9
	false	undefined	0							undefined	0	58e384285ba4cb100097f6cf		false	537708	1048	118	0	0	0	0	1	undefined	58e3820e5ba4cb100097f2e9
	false	undefined	0							undefined	0	58e384285ba4cb100097f6d0		false	538251	1049	114	0	0	0	0	1	undefined	58e3820e5ba4cb100097f2e9
	false	undefined	0							undefined	0	58e384295ba4cb100097f6d1		false	538837	1050	115	0	0	0	0	1	undefined	58e3820e5ba4cb100097f2e9
	false	undefined	0							undefined	0	58e384295ba4cb100097f6d2		false	539370	1051	116	0	0	0	0	1	undefined	58e3820e5ba4cb100097f2e9
	false	undefined	0							undefined	0	58e3842a5ba4cb100097f6d3		false	539901	1052	116	0	0	0	0	1	undefined	58e3820e5ba4cb100097f2e9
	false	undefined	0							undefined	0	58e3842a5ba4cb100097f6d4		false	540435	1053	115	0	0	0	0	1	undefined	58e3820e5ba4cb100097f2e9
	false	undefined	0							undefined	0	58e3842b5ba4cb100097f6d5		false	541049	1054	116	0	0	0	0	1	undefined	58e3820e5ba4cb100097f2e9
	false	undefined	0							undefined	0	58e3842c5ba4cb100097f6d6		false	541590	1055	118	0	0	0	0	1	undefined	58e3820e5ba4cb100097f2e9
	false	undefined	0							undefined	0	58e3842c5ba4cb100097f6d7		false	542101	1056	116	0	0	0	0	1	undefined	58e3820e5ba4cb100097f2e9
	false	undefined	0							undefined	0	58e3842d5ba4cb100097f6d8		false	542662	1057	116	0	0	0	0	1	undefined	58e3820e5ba4cb100097f2e9
	false	undefined	0							undefined	0	58e3842d5ba4cb100097f6d9		false	543181	1058	116	0	0	0	0	1	undefined	58e3820e5ba4cb100097f2e9
	false	undefined	0							undefined	0	58e3842e5ba4cb100097f6da		false	543720	1059	116	0	0	0	0	1	undefined	58e3820e5ba4cb100097f2e9
	false	undefined	0							undefined	0	58e3842e5ba4cb100097f6db		false	544313	1060	117	0	0	0	0	1	undefined	58e3820e5ba4cb100097f2e9
	false	undefined	0							undefined	0	58e3842f5ba4cb100097f6dc		false	544853	1061	117	0	0	0	0	1	undefined	58e3820e5ba4cb100097f2e9
	false	undefined	0							undefined	0	58e3842f5ba4cb100097f6dd		false	545379	1062	117	0	0	0	0	1	undefined	58e3820e5ba4cb100097f2e9
	false	undefined	0							undefined	0	58e384305ba4cb100097f6de		false	545910	1063	117	0	0	0	0	1	undefined	58e3820e5ba4cb100097f2e9
	false	undefined	0							undefined	0	58e384315ba4cb100097f6df		false	546446	1064	120	0	0	0	0	1	undefined	58e3820e5ba4cb100097f2e9
	false	undefined	0							undefined	0	58e384315ba4cb100097f6e0		false	546978	1065	123	0	0	0	0	1	undefined	58e3820e5ba4cb100097f2e9
	false	undefined	0							undefined	0	58e384325ba4cb100097f6e1		false	547516	1066	121	0	0	0	0	1	undefined	58e3820e5ba4cb100097f2e9
	false	undefined	0							undefined	0	58e384325ba4cb100097f6e2		false	548059	1067	118	0	0	0	0	1	undefined	58e3820e5ba4cb100097f2e9
	false	undefined	0							undefined	0	58e384335ba4cb100097f6e3		false	548592	1068	115	0	0	0	0	1	undefined	58e3820e5ba4cb100097f2e9
	false	undefined	0							undefined	0	58e384335ba4cb100097f6e4		false	549076	1069	111	0	0	0	0	1	undefined	58e3820e5ba4cb100097f2e9
	false	undefined	0							undefined	0	58e384345ba4cb100097f6e5		true	549593	1070	100	0	0	0	0	1	undefined	58e3820e5ba4cb100097f2e9
	false	undefined	0							undefined	0	58e384345ba4cb100097f6e6		true	550126	1071	77	0	0	0	0	1	undefined	58e3820e5ba4cb100097f2e9
	false	undefined	0							undefined	0	58e384355ba4cb100097f6e7		false	550750	1072	-1	0	0	0	0	1	undefined	58e3820e5ba4cb100097f2e9
	false	undefined	0							undefined	0	58e384355ba4cb100097f6e8		true	551255	1073	-1	0	0	0	0	1	undefined	58e3820e5ba4cb100097f2e9
	false	undefined	0							undefined	0	58e384365ba4cb100097f6e9		true	551721	1074	-1	0	0	0	0	1	undefined	58e3820e5ba4cb100097f2e9
	false	undefined	0							undefined	0	58e384365ba4cb100097f6ea		true	552259	1075	-1	0	0	0	0	1	undefined	58e3820e5ba4cb100097f2e9
	false	undefined	0							undefined	0	58e384375ba4cb100097f6eb		true	552796	1076	-1	0	0	0	0	1	undefined	58e3820e5ba4cb100097f2e9
	false	undefined	0							undefined	0	58e384375ba4cb100097f6ec		true	553285	1077	-1	0	0	0	0	1	undefined	58e3820e5ba4cb100097f2e9
	false	undefined	0							undefined	0	58e384385ba4cb100097f6ed		true	553867	1078	-1	0	0	0	0	1	undefined	58e3820e5ba4cb100097f2e9
	false	undefined	0							undefined	0	58e384385ba4cb100097f6ee		true	554400	1079	-1	0	0	0	0	1	undefined	58e3820e5ba4cb100097f2e9
	false	undefined	0							undefined	0	58e384395ba4cb100097f6ef		true	554947	1080	41	0	0	0	0	1	undefined	58e3820e5ba4cb100097f2e9
	false	undefined	0							undefined	0	58e3843a5ba4cb100097f6f0		true	555465	1081	40	0	0	0	0	1	undefined	58e3820e5ba4cb100097f2e9
	false	undefined	0							undefined	0	58e3843a5ba4cb100097f6f1		true	555998	1082	40	0	0	0	0	1	undefined	58e3820e5ba4cb100097f2e9
	false	undefined	0							undefined	0	58e3843b5ba4cb100097f6f2		true	556538	1086	41	0	0	0	0	1	undefined	58e3820e5ba4cb100097f2e9
	false	undefined	0							undefined	0	58e3843b5ba4cb100097f6f3		true	557144	1087	43	0	0	0	0	1	undefined	58e3820e5ba4cb100097f2e9
	false	undefined	0							undefined	0	58e3843c5ba4cb100097f6f4		true	557755	1088	42	0	0	0	0	1	undefined	58e3820e5ba4cb100097f2e9
	false	undefined	0							undefined	0	58e3843c5ba4cb100097f6f5		true	558268	1089	45	0	0	0	0	1	undefined	58e3820e5ba4cb100097f2e9
	false	undefined	0							undefined	0	58e3843d5ba4cb100097f6f6		true	558810	1090	43	0	0	0	0	1	undefined	58e3820e5ba4cb100097f2e9
	false	undefined	0							undefined	0	58e3843d5ba4cb100097f6f7		true	559343	1091	37	0	0	0	0	1	undefined	58e3820e5ba4cb100097f2e9
	false	undefined	0							undefined	0	58e3843e5ba4cb100097f6f8		false	559814	1101	39	0	0	0	0	1	undefined	58e3820e5ba4cb100097f2e9
	false	undefined	0							undefined	0	58e3843f5ba4cb100097f6f9		false	560475	1102	38	0	0	0	0	1	undefined	58e3820e5ba4cb100097f2e9
	false	undefined	0							undefined	0	58e3843f5ba4cb100097f6fa		false	560961	1103	38	0	0	0	0	1	undefined	58e3820e5ba4cb100097f2e9
	false	undefined	0							undefined	0	58e384405ba4cb100097f6fb		false	561548	1104	38	0	0	0	0	1	undefined	58e3820e5ba4cb100097f2e9
	false	undefined	0							undefined	0	58e384405ba4cb100097f6fc		false	562073	1105	-1	0	0	0	0	1	undefined	58e3820e5ba4cb100097f2e9
	false	undefined	0							undefined	0	58e384415ba4cb100097f6fd		true	562611	1106	-1	0	0	0	0	1	undefined	58e3820e5ba4cb100097f2e9
	false	undefined	0							undefined	0	58e384415ba4cb100097f6fe		true	563156	1107	-1	0	0	0	0	1	undefined	58e3820e5ba4cb100097f2e9
	false	undefined	0							undefined	0	58e384425ba4cb100097f6ff		true	563689	1108	-1	0	0	0	0	1	undefined	58e3820e5ba4cb100097f2e9
	false	undefined	0							undefined	0	58e384425ba4cb100097f700		true	564223	1109	-1	0	0	0	0	1	undefined	58e3820e5ba4cb100097f2e9
	false	undefined	0							undefined	0	58e384435ba4cb100097f701		true	564764	1110	-1	0	0	0	0	1	undefined	58e3820e5ba4cb100097f2e9
	false	undefined	0							undefined	0	58e384435ba4cb100097f702		true	565281	1111	-1	0	0	0	0	1	undefined	58e3820e5ba4cb100097f2e9
	false	undefined	0							undefined	0	58e384445ba4cb100097f703		false	565789	1112	-1	0	0	0	0	1	undefined	58e3820e5ba4cb100097f2e9
	false	undefined	0							undefined	0	58e384445ba4cb100097f704		false	566376	1113	-1	0	0	0	0	1	undefined	58e3820e5ba4cb100097f2e9
	false	undefined	0							undefined	0	58e384455ba4cb100097f705		false	566883	1114	-1	0	0	0	0	1	undefined	58e3820e5ba4cb100097f2e9
	false	undefined	0							undefined	0	58e384455ba4cb100097f706		false	567419	1118	-1	0	0	0	0	1	undefined	58e3820e5ba4cb100097f2e9
	false	undefined	0							undefined	0	58e384465ba4cb100097f707		false	567966	1119	-1	0	0	0	0	1	undefined	58e3820e5ba4cb100097f2e9
	false	undefined	0							undefined	0	58e384475ba4cb100097f708		false	568440	1120	-1	0	0	0	0	1	undefined	58e3820e5ba4cb100097f2e9
	false	undefined	0							undefined	0	58e384475ba4cb100097f709		false	569034	1121	-1	0	0	0	0	1	undefined	58e3820e5ba4cb100097f2e9
	false	undefined	0							undefined	0	58e384485ba4cb100097f70a		false	569564	1122	-1	0	0	0	0	1	undefined	58e3820e5ba4cb100097f2e9
	false	undefined	0							undefined	0	58e384485ba4cb100097f70b		false	570035	1123	-1	0	0	0	0	1	undefined	58e3820e5ba4cb100097f2e9
	false	undefined	0							undefined	0	58e384495ba4cb100097f70d		false	570775	1127	-1	0	0	0	0	1	undefined	58e3820e5ba4cb100097f2e9
[truncated: 34 more columns]
