# Supplementary material for: Real-Time Chest Compression Quality Measurements by Smartphone Camera
Source: J Healthc Eng. 2018 Oct 28;2018:6241856. doi: 10.1155/2018/6241856 (PMC6277120; doi:10.1155/2018/6241856)
Supplement: Supplementary Materials — The supplementary material consists data files for each of the five presented experiments. For the first four experiments, the data are presented for each test person as Matlab mat-files containing both the compared reference data and the detection data. For the fifth test, CPR summary report test, the data is presented as ssx-files (reference data) and xls-files (detection data). A readme-file explaining the preprocessing performed prior to the comparison between reference data and detection data is here also included. [file 6241856.f1.zip › 6241856.f1/Data files/Test 5. CPR summary report/TestData/TP3/TP3.xls]

## Sheet: kjersti
$__	isNew	errors	_maxListeners	_doc	_pres	_posts	save	db	collection	discriminators	__v	id	_id	scepticalToFrequency	mse	sequence	rate	pp2pt	p2et	s2pt	rd	pd	edt	sid	schema	$__delta	$__version	increment	$__where	remove	model	$__buildDoc	init	$__storeShard	hook	pre	post	removePre	_lazySetupHooks	update	set	$__shouldModify	$__set	getValue	setValue	get	$__path	markModified	$__try
	false	undefined	0							undefined	0	58e62ffd09e55e10009c79da		false	586	0	0	0	0	0	0	1	undefined	58e62ffd09e55e10009c79d9
	false	undefined	0							undefined	0	58e62ffe09e55e10009c79db		false	1287	1	0	0	0	0	0	1	undefined	58e62ffd09e55e10009c79d9
	false	undefined	0							undefined	0	58e62fff09e55e10009c79dc		false	1840	2	0	0	0	0	0	1	undefined	58e62ffd09e55e10009c79d9
	false	undefined	0							undefined	0	58e62fff09e55e10009c79dd		false	2220	3	0	0	0	0	0	1	undefined	58e62ffd09e55e10009c79d9
	false	undefined	0							undefined	0	58e6300009e55e10009c79de		false	2746	4	0	0	0	0	0	1	undefined	58e62ffd09e55e10009c79d9
	false	undefined	0							undefined	0	58e6300009e55e10009c79df		false	3374	5	-1	0	0	0	0	1	undefined	58e62ffd09e55e10009c79d9
	false	undefined	0							undefined	0	58e6300109e55e10009c79e0		false	3963	6	-1	0	0	0	0	1	undefined	58e62ffd09e55e10009c79d9
	false	undefined	0							undefined	0	58e6300109e55e10009c79e1		false	4487	7	-1	0	0	0	0	1	undefined	58e62ffd09e55e10009c79d9
	false	undefined	0							undefined	0	58e6300209e55e10009c79e2		false	4978	8	-1	0	0	0	0	1	undefined	58e62ffd09e55e10009c79d9
	false	undefined	0							undefined	0	58e6300209e55e10009c79e3		false	5568	9	-1	0	0	0	0	1	undefined	58e62ffd09e55e10009c79d9
	false	undefined	0							undefined	0	58e6300309e55e10009c79e4		false	6100	10	-1	0	0	0	0	1	undefined	58e62ffd09e55e10009c79d9
	false	undefined	0							undefined	0	58e6300309e55e10009c79e5		true	6628	11	-1	0	0	0	0	1	undefined	58e62ffd09e55e10009c79d9
	false	undefined	0							undefined	0	58e6300409e55e10009c79e6		true	7083	12	-1	0	0	0	0	1	undefined	58e62ffd09e55e10009c79d9
	false	undefined	0							undefined	0	58e6300409e55e10009c79e7		true	7697	13	-1	0	0	0	0	1	undefined	58e62ffd09e55e10009c79d9
	false	undefined	0							undefined	0	58e6300509e55e10009c79e8		true	8185	14	-1	0	0	0	0	1	undefined	58e62ffd09e55e10009c79d9
	false	undefined	0							undefined	0	58e6300509e55e10009c79e9		true	8716	15	-1	0	0	0	0	1	undefined	58e62ffd09e55e10009c79d9
	false	undefined	0							undefined	0	58e6300609e55e10009c79ea		true	9306	16	63	0	0	0	0	1	undefined	58e62ffd09e55e10009c79d9
	false	undefined	0							undefined	0	58e6300709e55e10009c79eb		true	9774	17	60	0	0	0	0	1	undefined	58e62ffd09e55e10009c79d9
	false	undefined	0							undefined	0	58e6300709e55e10009c79ec		false	10291	21	-1	0	0	0	0	1	undefined	58e62ffd09e55e10009c79d9
	false	undefined	0							undefined	0	58e6300809e55e10009c79ed		false	10765	22	-1	0	0	0	0	1	undefined	58e62ffd09e55e10009c79d9
	false	undefined	0							undefined	0	58e6300809e55e10009c79ee		false	11384	23	-1	0	0	0	0	1	undefined	58e62ffd09e55e10009c79d9
	false	undefined	0							undefined	0	58e6300909e55e10009c79ef		false	11836	24	-1	0	0	0	0	1	undefined	58e62ffd09e55e10009c79d9
	false	undefined	0							undefined	0	58e6300909e55e10009c79f0		false	12373	25	-1	0	0	0	0	1	undefined	58e62ffd09e55e10009c79d9
	false	undefined	0							undefined	0	58e6300a09e55e10009c79f1		true	12993	26	102	0	0	0	0	1	undefined	58e62ffd09e55e10009c79d9
	false	undefined	0							undefined	0	58e6300a09e55e10009c79f2		true	13514	27	91	0	0	0	0	1	undefined	58e62ffd09e55e10009c79d9
	false	undefined	0							undefined	0	58e6300b09e55e10009c79f3		true	14036	28	85	0	0	0	0	1	undefined	58e62ffd09e55e10009c79d9
	false	undefined	0							undefined	0	58e6300b09e55e10009c79f4		true	14573	32	121	0	0	0	0	1	undefined	58e62ffd09e55e10009c79d9
	false	undefined	0							undefined	0	58e6300c09e55e10009c79f5		true	15121	33	126	0	0	0	0	1	undefined	58e62ffd09e55e10009c79d9
	false	undefined	0							undefined	0	58e6300c09e55e10009c79f6		true	15634	34	127	0	0	0	0	1	undefined	58e62ffd09e55e10009c79d9
	false	undefined	0							undefined	0	58e6300d09e55e10009c79f7		true	16183	35	-1	0	0	0	0	1	undefined	58e62ffd09e55e10009c79d9
	false	undefined	0							undefined	0	58e6300e09e55e10009c79f8		true	16721	36	-1	0	0	0	0	1	undefined	58e62ffd09e55e10009c79d9
	false	undefined	0							undefined	0	58e6300e09e55e10009c79f9		true	17245	37	-1	0	0	0	0	1	undefined	58e62ffd09e55e10009c79d9
	false	undefined	0							undefined	0	58e6300f09e55e10009c79fa		true	17780	41	-1	0	0	0	0	1	undefined	58e62ffd09e55e10009c79d9
	false	undefined	0							undefined	0	58e6300f09e55e10009c79fb		true	18312	42	-1	0	0	0	0	1	undefined	58e62ffd09e55e10009c79d9
	false	undefined	0							undefined	0	58e6301009e55e10009c79fc		false	18855	43	-1	0	0	0	0	1	undefined	58e62ffd09e55e10009c79d9
	false	undefined	0							undefined	0	58e6301009e55e10009c79fd		false	19393	44	-1	0	0	0	0	1	undefined	58e62ffd09e55e10009c79d9
	false	undefined	0							undefined	0	58e6301109e55e10009c79fe		false	19926	45	-1	0	0	0	0	1	undefined	58e62ffd09e55e10009c79d9
	false	undefined	0							undefined	0	58e6301109e55e10009c79ff		false	20465	46	-1	0	0	0	0	1	undefined	58e62ffd09e55e10009c79d9
	false	undefined	0							undefined	0	58e6301209e55e10009c7a00		false	21006	47	-1	0	0	0	0	1	undefined	58e62ffd09e55e10009c79d9
	false	undefined	0							undefined	0	58e6301309e55e10009c7a01		false	21526	48	-1	0	0	0	0	1	undefined	58e62ffd09e55e10009c79d9
	false	undefined	0							undefined	0	58e6301309e55e10009c7a02		false	22328	49	-1	0	0	0	0	1	undefined	58e62ffd09e55e10009c79d9
	false	undefined	0							undefined	0	58e6301409e55e10009c7a03		false	22877	50	-1	0	0	0	0	1	undefined	58e62ffd09e55e10009c79d9
	false	undefined	0							undefined	0	58e6301409e55e10009c7a04		true	23206	51	-1	0	0	0	0	1	undefined	58e62ffd09e55e10009c79d9
	false	undefined	0							undefined	0	58e6301509e55e10009c7a05		true	23735	52	-1	0	0	0	0	1	undefined	58e62ffd09e55e10009c79d9
	false	undefined	0							undefined	0	58e6301509e55e10009c7a06		true	24259	53	-1	0	0	0	0	1	undefined	58e62ffd09e55e10009c79d9
	false	undefined	0							undefined	0	58e6301609e55e10009c7a07		true	24813	54	-1	0	0	0	0	1	undefined	58e62ffd09e55e10009c79d9
	false	undefined	0							undefined	0	58e6301609e55e10009c7a08		false	25347	55	-1	0	0	0	0	1	undefined	58e62ffd09e55e10009c79d9
	false	undefined	0							undefined	0	58e6301709e55e10009c7a09		false	25878	56	-1	0	0	0	0	1	undefined	58e62ffd09e55e10009c79d9
	false	undefined	0							undefined	0	58e6301709e55e10009c7a0a		true	26452	57	-1	0	0	0	0	1	undefined	58e62ffd09e55e10009c79d9
	false	undefined	0							undefined	0	58e6301809e55e10009c7a0b		false	27013	61	-1	0	0	0	0	1	undefined	58e62ffd09e55e10009c79d9
	false	undefined	0							undefined	0	58e6301809e55e10009c7a0c		false	27547	62	-1	0	0	0	0	1	undefined	58e62ffd09e55e10009c79d9
	false	undefined	0							undefined	0	58e6301909e55e10009c7a0d		true	28070	63	-1	0	0	0	0	1	undefined	58e62ffd09e55e10009c79d9
	false	undefined	0							undefined	0	58e6301a09e55e10009c7a0e		true	28722	64	101	0	0	0	0	1	undefined	58e62ffd09e55e10009c79d9
	false	undefined	0							undefined	0	58e6301a09e55e10009c7a0f		true	29209	65	96	0	0	0	0	1	undefined	58e62ffd09e55e10009c79d9
	false	undefined	0							undefined	0	58e6301b09e55e10009c7a10		false	29745	66	81	0	0	0	0	1	undefined	58e62ffd09e55e10009c79d9
	false	undefined	0							undefined	0	58e6301b09e55e10009c7a11		false	30285	70	105	0	0	0	0	1	undefined	58e62ffd09e55e10009c79d9
	false	undefined	0							undefined	0	58e6301c09e55e10009c7a12		false	30802	71	108	0	0	0	0	1	undefined	58e62ffd09e55e10009c79d9
	false	undefined	0							undefined	0	58e6301c09e55e10009c7a13		false	31352	72	111	0	0	0	0	1	undefined	58e62ffd09e55e10009c79d9
	false	undefined	0							undefined	0	58e6301d09e55e10009c7a14		false	31883	73	112	0	0	0	0	1	undefined	58e62ffd09e55e10009c79d9
	false	undefined	0							undefined	0	58e6301d09e55e10009c7a15		false	32395	74	111	0	0	0	0	1	undefined	58e62ffd09e55e10009c79d9
	false	undefined	0							undefined	0	58e6301e09e55e10009c7a16		false	32880	75	110	0	0	0	0	1	undefined	58e62ffd09e55e10009c79d9
	false	undefined	0							undefined	0	58e6301e09e55e10009c7a17		false	33546	76	111	0	0	0	0	1	undefined	58e62ffd09e55e10009c79d9
	false	undefined	0							undefined	0	58e6301f09e55e10009c7a18		false	34076	77	113	0	0	0	0	1	undefined	58e62ffd09e55e10009c79d9
	false	undefined	0							undefined	0	58e6301f09e55e10009c7a19		false	34600	78	112	0	0	0	0	1	undefined	58e62ffd09e55e10009c79d9
	false	undefined	0							undefined	0	58e6302009e55e10009c7a1a		false	35152	79	110	0	0	0	0	1	undefined	58e62ffd09e55e10009c79d9
	false	undefined	0							undefined	0	58e6302009e55e10009c7a1b		false	35681	80	109	0	0	0	0	1	undefined	58e62ffd09e55e10009c79d9
	false	undefined	0							undefined	0	58e6302109e55e10009c7a1c		false	36221	81	110	0	0	0	0	1	undefined	58e62ffd09e55e10009c79d9
	false	undefined	0							undefined	0	58e6302209e55e10009c7a1d		false	36757	82	112	0	0	0	0	1	undefined	58e62ffd09e55e10009c79d9
	false	undefined	0							undefined	0	58e6302209e55e10009c7a1e		false	37297	83	111	0	0	0	0	1	undefined	58e62ffd09e55e10009c79d9
	false	undefined	0							undefined	0	58e6302309e55e10009c7a1f		false	37819	84	112	0	0	0	0	1	undefined	58e62ffd09e55e10009c79d9
	false	undefined	0							undefined	0	58e6302309e55e10009c7a20		false	38292	85	112	0	0	0	0	1	undefined	58e62ffd09e55e10009c79d9
	false	undefined	0							undefined	0	58e6302409e55e10009c7a21		false	38835	86	112	0	0	0	0	1	undefined	58e62ffd09e55e10009c79d9
	false	undefined	0							undefined	0	58e6302409e55e10009c7a22		false	39358	87	112	0	0	0	0	1	undefined	58e62ffd09e55e10009c79d9
	false	undefined	0							undefined	0	58e6302509e55e10009c7a23		false	39897	88	112	0	0	0	0	1	undefined	58e62ffd09e55e10009c79d9
	false	undefined	0							undefined	0	58e6302509e55e10009c7a24		false	40377	89	109	0	0	0	0	1	undefined	58e62ffd09e55e10009c79d9
	false	undefined	0							undefined	0	58e6302609e55e10009c7a25		false	40899	90	108	0	0	0	0	1	undefined	58e62ffd09e55e10009c79d9
	false	undefined	0							undefined	0	58e6302609e55e10009c7a26		false	41504	91	109	0	0	0	0	1	undefined	58e62ffd09e55e10009c79d9
	false	undefined	0							undefined	0	58e6302709e55e10009c7a27		false	42032	92	109	0	0	0	0	1	undefined	58e62ffd09e55e10009c79d9
	false	undefined	0							undefined	0	58e6302709e55e10009c7a28		false	42581	93	110	0	0	0	0	1	undefined	58e62ffd09e55e10009c79d9
	false	undefined	0							undefined	0	58e6302809e55e10009c7a29		false	43109	94	111	0	0	0	0	1	undefined	58e62ffd09e55e10009c79d9
	false	undefined	0							undefined	0	58e6302809e55e10009c7a2a		false	43621	95	112	0	0	0	0	1	undefined	58e62ffd09e55e10009c79d9
	false	undefined	0							undefined	0	58e6302909e55e10009c7a2b		false	44177	96	110	0	0	0	0	1	undefined	58e62ffd09e55e10009c79d9
	false	undefined	0							undefined	0	58e6302909e55e10009c7a2c		false	44695	97	111	0	0	0	0	1	undefined	58e62ffd09e55e10009c79d9
	false	undefined	0							undefined	0	58e6302a09e55e10009c7a2d		false	45235	98	113	0	0	0	0	1	undefined	58e62ffd09e55e10009c79d9
	false	undefined	0							undefined	0	58e6302b09e55e10009c7a2e		false	45760	99	114	0	0	0	0	1	undefined	58e62ffd09e55e10009c79d9
	false	undefined	0							undefined	0	58e6302b09e55e10009c7a2f		false	46304	100	115	0	0	0	0	1	undefined	58e62ffd09e55e10009c79d9
	false	undefined	0							undefined	0	58e6302c09e55e10009c7a30		false	46778	101	111	0	0	0	0	1	undefined	58e62ffd09e55e10009c79d9
	false	undefined	0							undefined	0	58e6302c09e55e10009c7a31		false	47315	102	111	0	0	0	0	1	undefined	58e62ffd09e55e10009c79d9
	false	undefined	0							undefined	0	58e6302d09e55e10009c7a32		false	47838	103	110	0	0	0	0	1	undefined	58e62ffd09e55e10009c79d9
	false	undefined	0							undefined	0	58e6302d09e55e10009c7a33		false	48393	104	109	0	0	0	0	1	undefined	58e62ffd09e55e10009c79d9
	false	undefined	0							undefined	0	58e6302e09e55e10009c7a34		false	48928	105	111	0	0	0	0	1	undefined	58e62ffd09e55e10009c79d9
	false	undefined	0							undefined	0	58e6302e09e55e10009c7a35		false	49453	106	112	0	0	0	0	1	undefined	58e62ffd09e55e10009c79d9
	false	undefined	0							undefined	0	58e6302f09e55e10009c7a36		false	49984	107	114	0	0	0	0	1	undefined	58e62ffd09e55e10009c79d9
	false	undefined	0							undefined	0	58e6302f09e55e10009c7a37		false	50506	108	114	0	0	0	0	1	undefined	58e62ffd09e55e10009c79d9
	false	undefined	0							undefined	0	58e6303009e55e10009c7a38		false	50993	109	110	0	0	0	0	1	undefined	58e62ffd09e55e10009c79d9
	false	undefined	0							undefined	0	58e6303009e55e10009c7a39		false	51592	110	109	0	0	0	0	1	undefined	58e62ffd09e55e10009c79d9
	false	undefined	0							undefined	0	58e6303109e55e10009c7a3a		false	52127	111	107	0	0	0	0	1	undefined	58e62ffd09e55e10009c79d9
	false	undefined	0							undefined	0	58e6303209e55e10009c7a3b		false	52724	112	109	0	0	0	0	1	undefined	58e62ffd09e55e10009c79d9
	false	undefined	0							undefined	0	58e6303209e55e10009c7a3c		false	53199	113	109	0	0	0	0	1	undefined	58e62ffd09e55e10009c79d9
	false	undefined	0							undefined	0	58e6303309e55e10009c7a3d		false	53676	114	109	0	0	0	0	1	undefined	58e62ffd09e55e10009c79d9
	false	undefined	0							undefined	0	58e6303309e55e10009c7a3e		false	54194	115	109	0	0	0	0	1	undefined	58e62ffd09e55e10009c79d9
	false	undefined	0							undefined	0	58e6303409e55e10009c7a3f		false	54739	116	110	0	0	0	0	1	undefined	58e62ffd09e55e10009c79d9
	false	undefined	0							undefined	0	58e6303409e55e10009c7a40		false	55257	117	112	0	0	0	0	1	undefined	58e62ffd09e55e10009c79d9
	false	undefined	0							undefined	0	58e6303509e55e10009c7a41		false	55797	118	109	0	0	0	0	1	undefined	58e62ffd09e55e10009c79d9
	false	undefined	0							undefined	0	58e6303509e55e10009c7a42		false	56326	119	111	0	0	0	0	1	undefined	58e62ffd09e55e10009c79d9
	false	undefined	0							undefined	0	58e6303609e55e10009c7a43		false	56866	120	109	0	0	0	0	1	undefined	58e62ffd09e55e10009c79d9
	false	undefined	0							undefined	0	58e6303609e55e10009c7a44		false	57387	121	109	0	0	0	0	1	undefined	58e62ffd09e55e10009c79d9
	false	undefined	0							undefined	0	58e6303709e55e10009c7a45		false	57886	122	107	0	0	0	0	1	undefined	58e62ffd09e55e10009c79d9
	false	undefined	0							undefined	0	58e6303709e55e10009c7a46		false	58396	123	106	0	0	0	0	1	undefined	58e62ffd09e55e10009c79d9
	false	undefined	0							undefined	0	58e6303809e55e10009c7a47		false	59008	124	107	0	0	0	0	1	undefined	58e62ffd09e55e10009c79d9
	false	undefined	0							undefined	0	58e6303809e55e10009c7a48		false	59671	125	106	0	0	0	0	1	undefined	58e62ffd09e55e10009c79d9
	false	undefined	0							undefined	0	58e6303909e55e10009c7a49		false	60131	126	107	0	0	0	0	1	undefined	58e62ffd09e55e10009c79d9
	false	undefined	0							undefined	0	58e6303909e55e10009c7a4a		false	60680	127	108	0	0	0	0	1	undefined	58e62ffd09e55e10009c79d9
	false	undefined	0							undefined	0	58e6303a09e55e10009c7a4b		false	61175	128	109	0	0	0	0	1	undefined	58e62ffd09e55e10009c79d9
	false	undefined	0							undefined	0	58e6303b09e55e10009c7a4c		false	61740	129	111	0	0	0	0	1	undefined	58e62ffd09e55e10009c79d9
	false	undefined	0							undefined	0	58e6303b09e55e10009c7a4d		false	62271	130	112	0	0	0	0	1	undefined	58e62ffd09e55e10009c79d9
	false	undefined	0							undefined	0	58e6303c09e55e10009c7a4e		false	62757	131	113	0	0	0	0	1	undefined	58e62ffd09e55e10009c79d9
	false	undefined	0							undefined	0	58e6303c09e55e10009c7a4f		false	63280	132	110	0	0	0	0	1	undefined	58e62ffd09e55e10009c79d9
	false	undefined	0							undefined	0	58e6303d09e55e10009c7a50		false	63790	133	108	0	0	0	0	1	undefined	58e62ffd09e55e10009c79d9
	false	undefined	0							undefined	0	58e6303d09e55e10009c7a51		false	64350	134	106	0	0	0	0	1	undefined	58e62ffd09e55e10009c79d9
	false	undefined	0							undefined	0	58e6303e09e55e10009c7a52		false	64884	135	106	0	0	0	0	1	undefined	58e62ffd09e55e10009c79d9
	false	undefined	0							undefined	0	58e6303e09e55e10009c7a53		false	65365	136	109	0	0	0	0	1	undefined	58e62ffd09e55e10009c79d9
	false	undefined	0							undefined	0	58e6303f09e55e10009c7a54		false	65878	137	108	0	0	0	0	1	undefined	58e62ffd09e55e10009c79d9
	false	undefined	0							undefined	0	58e6303f09e55e10009c7a55		false	66496	138	109	0	0	0	0	1	undefined	58e62ffd09e55e10009c79d9
	false	undefined	0							undefined	0	58e6304009e55e10009c7a56		false	67021	139	106	0	0	0	0	1	undefined	58e62ffd09e55e10009c79d9
	false	undefined	0							undefined	0	58e6304009e55e10009c7a57		false	67551	140	107	0	0	0	0	1	undefined	58e62ffd09e55e10009c79d9
	false	undefined	0							undefined	0	58e6304109e55e10009c7a58		false	68075	141	109	0	0	0	0	1	undefined	58e62ffd09e55e10009c79d9
	false	undefined	0							undefined	0	58e6304109e55e10009c7a59		false	68613	142	108	0	0	0	0	1	undefined	58e62ffd09e55e10009c79d9
	false	undefined	0							undefined	0	58e6304209e55e10009c7a5a		false	69158	143	109	0	0	0	0	1	undefined	58e62ffd09e55e10009c79d9
	false	undefined	0							undefined	0	58e6304209e55e10009c7a5b		false	69611	144	106	0	0	0	0	1	undefined	58e62ffd09e55e10009c79d9
	false	undefined	0							undefined	0	58e6304309e55e10009c7a5c		false	70170	145	108	0	0	0	0	1	undefined	58e62ffd09e55e10009c79d9
	false	undefined	0							undefined	0	58e6304309e55e10009c7a5d		false	70697	146	108	0	0	0	0	1	undefined	58e62ffd09e55e10009c79d9
	false	undefined	0							undefined	0	58e6304409e55e10009c7a5e		false	71223	147	107	0	0	0	0	1	undefined	58e62ffd09e55e10009c79d9
	false	undefined	0							undefined	0	58e6304509e55e10009c7a5f		false	71780	148	106	0	0	0	0	1	undefined	58e62ffd09e55e10009c79d9
	false	undefined	0							undefined	0	58e6304509e55e10009c7a60		false	72374	149	106	0	0	0	0	1	undefined	58e62ffd09e55e10009c79d9
	false	undefined	0							undefined	0	58e6304609e55e10009c7a61		false	72891	150	107	0	0	0	0	1	undefined	58e62ffd09e55e10009c79d9
	false	undefined	0							undefined	0	58e6304609e55e10009c7a62		false	73425	151	108	0	0	0	0	1	undefined	58e62ffd09e55e10009c79d9
	false	undefined	0							undefined	0	58e6304709e55e10009c7a63		false	73977	152	109	0	0	0	0	1	undefined	58e62ffd09e55e10009c79d9
	false	undefined	0							undefined	0	58e6304709e55e10009c7a64		false	74469	153	110	0	0	0	0	1	undefined	58e62ffd09e55e10009c79d9
	false	undefined	0							undefined	0	58e6304809e55e10009c7a65		false	75028	154	111	0	0	0	0	1	undefined	58e62ffd09e55e10009c79d9
	false	undefined	0							undefined	0	58e6304809e55e10009c7a66		false	75563	155	109	0	0	0	0	1	undefined	58e62ffd09e55e10009c79d9
	false	undefined	0							undefined	0	58e6304909e55e10009c7a67		false	76093	156	107	0	0	0	0	1	undefined	58e62ffd09e55e10009c79d9
	false	undefined	0							undefined	0	58e6304909e55e10009c7a68		false	76639	157	108	0	0	0	0	1	undefined	58e62ffd09e55e10009c79d9
	false	undefined	0							undefined	0	58e6304a09e55e10009c7a69		false	77174	158	109	0	0	0	0	1	undefined	58e62ffd09e55e10009c79d9
	false	undefined	0							undefined	0	58e6304b09e55e10009c7a6a		false	77772	159	108	0	0	0	0	1	undefined	58e62ffd09e55e10009c79d9
	false	undefined	0							undefined	0	58e6304b09e55e10009c7a6b		false	78301	160	106	0	0	0	0	1	undefined	58e62ffd09e55e10009c79d9
	false	undefined	0							undefined	0	58e6304c09e55e10009c7a6c		false	78847	161	106	0	0	0	0	1	undefined	58e62ffd09e55e10009c79d9
	false	undefined	0							undefined	0	58e6304c09e55e10009c7a6d		false	79362	162	106	0	0	0	0	1	undefined	58e62ffd09e55e10009c79d9
	false	undefined	0							undefined	0	58e6304d09e55e10009c7a6e		false	79993	163	107	0	0	0	0	1	undefined	58e62ffd09e55e10009c79d9
	false	undefined	0							undefined	0	58e6304d09e55e10009c7a6f		false	80587	164	109	0	0	0	0	1	undefined	58e62ffd09e55e10009c79d9
	false	undefined	0							undefined	0	58e6304e09e55e10009c7a70		false	81116	165	110	0	0	0	0	1	undefined	58e62ffd09e55e10009c79d9
	false	undefined	0							undefined	0	58e6304e09e55e10009c7a71		false	81650	166	110	0	0	0	0	1	undefined	58e62ffd09e55e10009c79d9
	false	undefined	0							undefined	0	58e6304f09e55e10009c7a72		false	82188	167	108	0	0	0	0	1	undefined	58e62ffd09e55e10009c79d9
	false	undefined	0							undefined	0	58e6305009e55e10009c7a73		false	82791	168	108	0	0	0	0	1	undefined	58e62ffd09e55e10009c79d9
	false	undefined	0							undefined	0	58e6305009e55e10009c7a74		false	83396	169	107	0	0	0	0	1	undefined	58e62ffd09e55e10009c79d9
	false	undefined	0							undefined	0	58e6305109e55e10009c7a75		false	83915	170	107	0	0	0	0	1	undefined	58e62ffd09e55e10009c79d9
	false	undefined	0							undefined	0	58e6305109e55e10009c7a76		false	84456	171	109	0	0	0	0	1	undefined	58e62ffd09e55e10009c79d9
	false	undefined	0							undefined	0	58e6305209e55e10009c7a77		false	84984	172	110	0	0	0	0	1	undefined	58e62ffd09e55e10009c79d9
	false	undefined	0							undefined	0	58e6305209e55e10009c7a78		false	85523	173	110	0	0	0	0	1	undefined	58e62ffd09e55e10009c79d9
	false	undefined	0							undefined	0	58e6305309e55e10009c7a79		false	86044	174	108	0	0	0	0	1	undefined	58e62ffd09e55e10009c79d9
	false	undefined	0							undefined	0	58e6305309e55e10009c7a7a		false	86602	175	108	0	0	0	0	1	undefined	58e62ffd09e55e10009c79d9
	false	undefined	0							undefined	0	58e6305409e55e10009c7a7b		false	87126	176	107	0	0	0	0	1	undefined	58e62ffd09e55e10009c79d9
	false	undefined	0							undefined	0	58e6305409e55e10009c7a7c		false	87658	177	107	0	0	0	0	1	undefined	58e62ffd09e55e10009c79d9
	false	undefined	0							undefined	0	58e6305509e55e10009c7a7d		false	88191	178	107	0	0	0	0	1	undefined	58e62ffd09e55e10009c79d9
	false	undefined	0							undefined	0	58e6305609e55e10009c7a7e		false	88710	179	109	0	0	0	0	1	undefined	58e62ffd09e55e10009c79d9
	false	undefined	0							undefined	0	58e6305609e55e10009c7a7f		false	89248	180	106	0	0	0	0	1	undefined	58e62ffd09e55e10009c79d9
	false	undefined	0							undefined	0	58e6305709e55e10009c7a80		false	89794	181	106	0	0	0	0	1	undefined	58e62ffd09e55e10009c79d9
	false	undefined	0							undefined	0	58e6305709e55e10009c7a81		false	90276	182	106	0	0	0	0	1	undefined	58e62ffd09e55e10009c79d9
	false	undefined	0							undefined	0	58e6305809e55e10009c7a82		false	90805	183	109	0	0	0	0	1	undefined	58e62ffd09e55e10009c79d9
	false	undefined	0							undefined	0	58e6305809e55e10009c7a83		false	91335	184	108	0	0	0	0	1	undefined	58e62ffd09e55e10009c79d9
	false	undefined	0							undefined	0	58e6305909e55e10009c7a84		false	91856	185	105	0	0	0	0	1	undefined	58e62ffd09e55e10009c79d9
	false	undefined	0							undefined	0	58e6305909e55e10009c7a85		false	92403	186	104	0	0	0	0	1	undefined	58e62ffd09e55e10009c79d9
	false	undefined	0							undefined	0	58e6305a09e55e10009c7a86		false	93011	187	107	0	0	0	0	1	undefined	58e62ffd09e55e10009c79d9
	false	undefined	0							undefined	0	58e6305a09e55e10009c7a87		false	93528	188	109	0	0	0	0	1	undefined	58e62ffd09e55e10009c79d9
	false	undefined	0							undefined	0	58e6305b09e55e10009c7a88		false	94071	189	109	0	0	0	0	1	undefined	58e62ffd09e55e10009c79d9
	false	undefined	0							undefined	0	58e6305b09e55e10009c7a89		false	94612	190	106	0	0	0	0	1	undefined	58e62ffd09e55e10009c79d9
	false	undefined	0							undefined	0	58e6305c09e55e10009c7a8a		false	95134	191	105	0	0	0	0	1	undefined	58e62ffd09e55e10009c79d9
	false	undefined	0							undefined	0	58e6305c09e55e10009c7a8b		false	95666	192	108	0	0	0	0	1	undefined	58e62ffd09e55e10009c79d9
	false	undefined	0							undefined	0	58e6305d09e55e10009c7a8c		false	96203	193	105	0	0	0	0	1	undefined	58e62ffd09e55e10009c79d9
	false	undefined	0							undefined	0	58e6305e09e55e10009c7a8d		false	96752	194	103	0	0	0	0	1	undefined	58e62ffd09e55e10009c79d9
	false	undefined	0							undefined	0	58e6305e09e55e10009c7a8e		false	97345	195	101	0	0	0	0	1	undefined	58e62ffd09e55e10009c79d9
	false	undefined	0							undefined	0	58e6305f09e55e10009c7a8f		false	97818	196	103	0	0	0	0	1	undefined	58e62ffd09e55e10009c79d9
	false	undefined	0							undefined	0	58e6305f09e55e10009c7a90		false	98342	197	107	0	0	0	0	1	undefined	58e62ffd09e55e10009c79d9
	false	undefined	0							undefined	0	58e6306009e55e10009c7a91		false	98890	198	109	0	0	0	0	1	undefined	58e62ffd09e55e10009c79d9
	false	undefined	0							undefined	0	58e6306009e55e10009c7a92		false	99421	199	112	0	0	0	0	1	undefined	58e62ffd09e55e10009c79d9
	false	undefined	0							undefined	0	58e6306109e55e10009c7a93		false	99952	200	116	0	0	0	0	1	undefined	58e62ffd09e55e10009c79d9
	false	undefined	0							undefined	0	58e6306109e55e10009c7a94		false	100477	201	116	0	0	0	0	1	undefined	58e62ffd09e55e10009c79d9
	false	undefined	0							undefined	0	58e6306209e55e10009c7a95		false	101024	202	119	0	0	0	0	1	undefined	58e62ffd09e55e10009c79d9
	false	undefined	0							undefined	0	58e6306209e55e10009c7a96		false	101553	203	116	0	0	0	0	1	undefined	58e62ffd09e55e10009c79d9
	false	undefined	0							undefined	0	58e6306309e55e10009c7a97		false	102087	204	112	0	0	0	0	1	undefined	58e62ffd09e55e10009c79d9
	false	undefined	0							undefined	0	58e6306309e55e10009c7a98		false	102617	205	108	0	0	0	0	1	undefined	58e62ffd09e55e10009c79d9
	false	undefined	0							undefined	0	58e6306409e55e10009c7a99		false	103156	206	111	0	0	0	0	1	undefined	58e62ffd09e55e10009c79d9
	false	undefined	0							undefined	0	58e6306409e55e10009c7a9a		false	103694	207	112	0	0	0	0	1	undefined	58e62ffd09e55e10009c79d9
	false	undefined	0							undefined	0	58e6306509e55e10009c7a9b		false	104170	208	114	0	0	0	0	1	undefined	58e62ffd09e55e10009c79d9
	false	undefined	0							undefined	0	58e6306609e55e10009c7a9c		false	104771	209	112	0	0	0	0	1	undefined	58e62ffd09e55e10009c79d9
	false	undefined	0							undefined	0	58e6306609e55e10009c7a9d		false	105283	210	113	0	0	0	0	1	undefined	58e62ffd09e55e10009c79d9
	false	undefined	0							undefined	0	58e6306709e55e10009c7a9e		false	105832	211	112	0	0	0	0	1	undefined	58e62ffd09e55e10009c79d9
	false	undefined	0							undefined	0	58e6306709e55e10009c7a9f		false	106351	212	112	0	0	0	0	1	undefined	58e62ffd09e55e10009c79d9
	false	undefined	0							undefined	0	58e6306809e55e10009c7aa0		false	106896	213	111	0	0	0	0	1	undefined	58e62ffd09e55e10009c79d9
	false	undefined	0							undefined	0	58e6306809e55e10009c7aa1		false	107422	214	111	0	0	0	0	1	undefined	58e62ffd09e55e10009c79d9
	false	undefined	0							undefined	0	58e6306909e55e10009c7aa2		false	107963	215	112	0	0	0	0	1	undefined	58e62ffd09e55e10009c79d9
	false	undefined	0							undefined	0	58e6306909e55e10009c7aa3		false	108494	216	112	0	0	0	0	1	undefined	58e62ffd09e55e10009c79d9
	false	undefined	0							undefined	0	58e6306a09e55e10009c7aa4		false	108963	217	112	0	0	0	0	1	undefined	58e62ffd09e55e10009c79d9
	false	undefined	0							undefined	0	58e6306a09e55e10009c7aa5		false	109590	218	110	0	0	0	0	1	undefined	58e62ffd09e55e10009c79d9
	false	undefined	0							undefined	0	58e6306b09e55e10009c7aa6		false	110102	219	112	0	0	0	0	1	undefined	58e62ffd09e55e10009c79d9
	false	undefined	0							undefined	0	58e6306b09e55e10009c7aa7		false	110707	220	110	0	0	0	0	1	undefined	58e62ffd09e55e10009c79d9
	false	undefined	0							undefined	0	58e6306c09e55e10009c7aa8		false	111227	221	110	0	0	0	0	1	undefined	58e62ffd09e55e10009c79d9
	false	undefined	0							undefined	0	58e6306d09e55e10009c7aa9		false	111779	222	109	0	0	0	0	1	undefined	58e62ffd09e55e10009c79d9
	false	undefined	0							undefined	0	58e6306d09e55e10009c7aaa		false	112304	223	110	0	0	0	0	1	undefined	58e62ffd09e55e10009c79d9
	false	undefined	0							undefined	0	58e6306e09e55e10009c7aab		false	112845	224	109	0	0	0	0	1	undefined	58e62ffd09e55e10009c79d9
	false	undefined	0							undefined	0	58e6306e09e55e10009c7aac		false	113453	225	108	0	0	0	0	1	undefined	58e62ffd09e55e10009c79d9
	false	undefined	0							undefined	0	58e6306f09e55e10009c7aad		false	113986	226	109	0	0	0	0	1	undefined	58e62ffd09e55e10009c79d9
	false	undefined	0							undefined	0	58e6306f09e55e10009c7aae		false	114509	227	109	0	0	0	0	1	undefined	58e62ffd09e55e10009c79d9
	false	undefined	0							undefined	0	58e6307009e55e10009c7aaf		false	115123	228	110	0	0	0	0	1	undefined	58e62ffd09e55e10009c79d9
	false	undefined	0							undefined	0	58e6307009e55e10009c7ab0		false	115642	229	109	0	0	0	0	1	undefined	58e62ffd09e55e10009c79d9
	false	undefined	0							undefined	0	58e6307109e55e10009c7ab1		false	116183	230	110	0	0	0	0	1	undefined	58e62ffd09e55e10009c79d9
	false	undefined	0							undefined	0	58e6307209e55e10009c7ab2		false	116714	231	109	0	0	0	0	1	undefined	58e62ffd09e55e10009c79d9
	false	undefined	0							undefined	0	58e6307209e55e10009c7ab3		false	117260	232	109	0	0	0	0	1	undefined	58e62ffd09e55e10009c79d9
	false	undefined	0							undefined	0	58e6307309e55e10009c7ab4		false	117770	233	110	0	0	0	0	1	undefined	58e62ffd09e55e10009c79d9
	false	undefined	0							undefined	0	58e6307309e55e10009c7ab5		false	118319	234	114	0	0	0	0	1	undefined	58e62ffd09e55e10009c79d9
	false	undefined	0							undefined	0	58e6307409e55e10009c7ab6		false	118856	235	116	0	0	0	0	1	undefined	58e62ffd09e55e10009c79d9
	false	undefined	0							undefined	0	58e6307409e55e10009c7ab7		false	119394	236	113	0	0	0	0	1	undefined	58e62ffd09e55e10009c79d9
	false	undefined	0							undefined	0	58e6307509e55e10009c7ab8		false	120000	237	111	0	0	0	0	1	undefined	58e62ffd09e55e10009c79d9
	false	undefined	0							undefined	0	58e6307509e55e10009c7ab9		false	120546	238	111	0	0	0	0	1	undefined	58e62ffd09e55e10009c79d9
	false	undefined	0							undefined	0	58e6307609e55e10009c7aba		false	121065	239	112	0	0	0	0	1	undefined	58e62ffd09e55e10009c79d9
	false	undefined	0							undefined	0	58e6307609e55e10009c7abb		false	121563	240	109	0	0	0	0	1	undefined	58e62ffd09e55e10009c79d9
	false	undefined	0							undefined	0	58e6307709e55e10009c7abc		false	122062	241	104	0	0	0	0	1	undefined	58e62ffd09e55e10009c79d9
	false	undefined	0							undefined	0	58e6307709e55e10009c7abd		false	122660	242	102	0	0	0	0	1	undefined	58e62ffd09e55e10009c79d9
	false	undefined	0							undefined	0	58e6307809e55e10009c7abe		false	123205	243	103	0	0	0	0	1	undefined	58e62ffd09e55e10009c79d9
	false	undefined	0							undefined	0	58e6307909e55e10009c7abf		false	123739	244	106	0	0	0	0	1	undefined	58e62ffd09e55e10009c79d9
	false	undefined	0							undefined	0	58e6307909e55e10009c7ac0		false	124268	245	106	0	0	0	0	1	undefined	58e62ffd09e55e10009c79d9
	false	undefined	0							undefined	0	58e6307a09e55e10009c7ac1		false	124800	246	107	0	0	0	0	1	undefined	58e62ffd09e55e10009c79d9
	false	undefined	0							undefined	0	58e6307a09e55e10009c7ac2		false	125335	247	107	0	0	0	0	1	undefined	58e62ffd09e55e10009c79d9
	false	undefined	0							undefined	0	58e6307b09e55e10009c7ac3		false	125874	248	108	0	0	0	0	1	undefined	58e62ffd09e55e10009c79d9
	false	undefined	0							undefined	0	58e6307b09e55e10009c7ac4		false	126407	249	110	0	0	0	0	1	undefined	58e62ffd09e55e10009c79d9
	false	undefined	0							undefined	0	58e6307c09e55e10009c7ac5		false	126925	250	114	0	0	0	0	1	undefined	58e62ffd09e55e10009c79d9
	false	undefined	0							undefined	0	58e6307c09e55e10009c7ac6		false	127466	251	115	0	0	0	0	1	undefined	58e62ffd09e55e10009c79d9
	false	undefined	0							undefined	0	58e6307d09e55e10009c7ac7		false	128011	252	113	0	0	0	0	1	undefined	58e62ffd09e55e10009c79d9
	false	undefined	0							undefined	0	58e6307d09e55e10009c7ac8		false	128543	253	112	0	0	0	0	1	undefined	58e62ffd09e55e10009c79d9
	false	undefined	0							undefined	0	58e6307e09e55e10009c7ac9		false	129065	254	108	0	0	0	0	1	undefined	58e62ffd09e55e10009c79d9
	false	undefined	0							undefined	0	58e6307e09e55e10009c7aca		false	129616	255	108	0	0	0	0	1	undefined	58e62ffd09e55e10009c79d9
	false	undefined	0							undefined	0	58e6307f09e55e10009c7acb		false	130215	256	107	0	0	0	0	1	undefined	58e62ffd09e55e10009c79d9
	false	undefined	0							undefined	0	58e6308009e55e10009c7acc		false	130742	257	107	0	0	0	0	1	undefined	58e62ffd09e55e10009c79d9
	false	undefined	0							undefined	0	58e6308009e55e10009c7acd		false	131290	258	108	0	0	0	0	1	undefined	58e62ffd09e55e10009c79d9
	false	undefined	0							undefined	0	58e6308109e55e10009c7ace		false	131809	259	111	0	0	0	0	1	undefined	58e62ffd09e55e10009c79d9
	false	undefined	0							undefined	0	58e6308109e55e10009c7acf		false	132340	260	109	0	0	0	0	1	undefined	58e62ffd09e55e10009c79d9
	false	undefined	0							undefined	0	58e6308209e55e10009c7ad0		false	132895	261	107	0	0	0	0	1	undefined	58e62ffd09e55e10009c79d9
	false	undefined	0							undefined	0	58e6308209e55e10009c7ad1		false	133422	262	106	0	0	0	0	1	undefined	58e62ffd09e55e10009c79d9
	false	undefined	0							undefined	0	58e6308309e55e10009c7ad2		false	133960	263	108	0	0	0	0	1	undefined	58e62ffd09e55e10009c79d9
	false	undefined	0							undefined	0	58e6308309e55e10009c7ad3		false	134422	264	107	0	0	0	0	1	undefined	58e62ffd09e55e10009c79d9
	false	undefined	0							undefined	0	58e6308409e55e10009c7ad4		false	135031	265	107	0	0	0	0	1	undefined	58e62ffd09e55e10009c79d9
	false	undefined	0							undefined	0	58e6308409e55e10009c7ad5		false	135569	266	107	0	0	0	0	1	undefined	58e62ffd09e55e10009c79d9
	false	undefined	0							undefined	0	58e6308509e55e10009c7ad6		false	136095	267	108	0	0	0	0	1	undefined	58e62ffd09e55e10009c79d9
	false	undefined	0							undefined	0	58e6308509e55e10009c7ad7		false	136575	268	109	0	0	0	0	1	undefined	58e62ffd09e55e10009c79d9
	false	undefined	0							undefined	0	58e6308609e55e10009c7ad8		false	137107	269	107	0	0	0	0	1	undefined	58e62ffd09e55e10009c79d9
	false	undefined	0							undefined	0	58e6308609e55e10009c7ad9		false	137675	270	110	0	0	0	0	1	undefined	58e62ffd09e55e10009c79d9
	false	undefined	0							undefined	0	58e6308709e55e10009c7ada		false	138169	271	110	0	0	0	0	1	undefined	58e62ffd09e55e10009c79d9
	false	undefined	0							undefined	0	58e6308809e55e10009c7adb		false	138771	272	109	0	0	0	0	1	undefined	58e62ffd09e55e10009c79d9
	false	undefined	0							undefined	0	58e6308809e55e10009c7adc		false	139296	273	105	0	0	0	0	1	undefined	58e62ffd09e55e10009c79d9
	false	undefined	0							undefined	0	58e6308909e55e10009c7add		false	139837	274	103	0	0	0	0	1	undefined	58e62ffd09e55e10009c79d9
	false	undefined	0							undefined	0	58e6308909e55e10009c7ade		false	140370	275	104	0	0	0	0	1	undefined	58e62ffd09e55e10009c79d9
	false	undefined	0							undefined	0	58e6308a09e55e10009c7adf		false	140900	276	105	0	0	0	0	1	undefined	58e62ffd09e55e10009c79d9
	false	undefined	0							undefined	0	58e6308a09e55e10009c7ae0		false	141432	277	107	0	0	0	0	1	undefined	58e62ffd09e55e10009c79d9
	false	undefined	0							undefined	0	58e6308b09e55e10009c7ae1		false	141975	278	106	0	0	0	0	1	undefined	58e62ffd09e55e10009c79d9
	false	undefined	0							undefined	0	58e6308b09e55e10009c7ae2		false	142504	279	105	0	0	0	0	1	undefined	58e62ffd09e55e10009c79d9
	false	undefined	0							undefined	0	58e6308c09e55e10009c7ae3		true	143035	280	109	0	0	0	0	1	undefined	58e62ffd09e55e10009c79d9
	false	undefined	0							undefined	0	58e6308c09e55e10009c7ae4		true	143532	281	84	0	0	0	0	1	undefined	58e62ffd09e55e10009c79d9
	false	undefined	0							undefined	0	58e6308d09e55e10009c7ae5		true	144027	282	-1	0	0	0	0	1	undefined	58e62ffd09e55e10009c79d9
	false	undefined	0							undefined	0	58e6308d09e55e10009c7ae6		true	144558	283	-1	0	0	0	0	1	undefined	58e62ffd09e55e10009c79d9
	false	undefined	0							undefined	0	58e6308e09e55e10009c7ae7		true	145115	287	-1	0	0	0	0	1	undefined	58e62ffd09e55e10009c79d9
	false	undefined	0							undefined	0	58e6308e09e55e10009c7ae8		true	145644	288	-1	0	0	0	0	1	undefined	58e62ffd09e55e10009c79d9
	false	undefined	0							undefined	0	58e6308f09e55e10009c7ae9		true	146257	289	-1	0	0	0	0	1	undefined	58e62ffd09e55e10009c79d9
	false	undefined	0							undefined	0	58e6309009e55e10009c7aea		true	146776	290	-1	0	0	0	0	1	undefined	58e62ffd09e55e10009c79d9
	false	undefined	0							undefined	0	58e6309009e55e10009c7aeb		true	147389	291	-1	0	0	0	0	1	undefined	58e62ffd09e55e10009c79d9
	false	undefined	0							undefined	0	58e6309109e55e10009c7aec		true	147974	292	-1	0	0	0	0	1	undefined	58e62ffd09e55e10009c79d9
	false	undefined	0							undefined	0	58e6309109e55e10009c7aed		true	148507	293	-1	0	0	0	0	1	undefined	58e62ffd09e55e10009c79d9
	false	undefined	0							undefined	0	58e6309209e55e10009c7aee		true	149051	294	76	0	0	0	0	1	undefined	58e62ffd09e55e10009c79d9
	false	undefined	0							undefined	0	58e6309209e55e10009c7aef		true	149582	295	-1	0	0	0	0	1	undefined	58e62ffd09e55e10009c79d9
	false	undefined	0							undefined	0	58e6309309e55e10009c7af0		true	150111	296	-1	0	0	0	0	1	undefined	58e62ffd09e55e10009c79d9
	false	undefined	0							undefined	0	58e6309309e55e10009c7af1		true	150661	300	79	0	0	0	0	1	undefined	58e62ffd09e55e10009c79d9
	false	undefined	0							undefined	0	58e6309409e55e10009c7af2		true	151192	301	-1	0	0	0	0	1	undefined	58e62ffd09e55e10009c79d9
	false	undefined	0							undefined	0	58e6309509e55e10009c7af3		true	151718	302	-1	0	0	0	0	1	undefined	58e62ffd09e55e10009c79d9
	false	undefined	0							undefined	0	58e6309509e55e10009c7af4		false	152246	303	-1	0	0	0	0	1	undefined	58e62ffd09e55e10009c79d9
	false	undefined	0							undefined	0	58e6309609e55e10009c7af5		true	152798	304	77	0	0	0	0	1	undefined	58e62ffd09e55e10009c79d9
	false	undefined	0							undefined	0	58e6309609e55e10009c7af6		true	153310	305	77	0	0	0	0	1	undefined	58e62ffd09e55e10009c79d9
	false	undefined	0							undefined	0	58e6309709e55e10009c7af7		true	153872	306	-1	0	0	0	0	1	undefined	58e62ffd09e55e10009c79d9
	false	undefined	0							undefined	0	58e6309709e55e10009c7af8		true	154471	307	-1	0	0	0	0	1	undefined	58e62ffd09e55e10009c79d9
	false	undefined	0							undefined	0	58e6309809e55e10009c7af9		true	155007	308	-1	0	0	0	0	1	undefined	58e62ffd09e55e10009c79d9
	false	undefined	0							undefined	0	58e6309809e55e10009c7afa		true	155532	309	-1	0	0	0	0	1	undefined	58e62ffd09e55e10009c79d9
	false	undefined	0							undefined	0	58e6309909e55e10009c7afb		true	156072	310	-1	0	0	0	0	1	undefined	58e62ffd09e55e10009c79d9
	false	undefined	0							undefined	0	58e6309909e55e10009c7afc		true	156660	311	-1	0	0	0	0	1	undefined	58e62ffd09e55e10009c79d9
	false	undefined	0							undefined	0	58e6309a09e55e10009c7afd		true	157127	312	-1	0	0	0	0	1	undefined	58e62ffd09e55e10009c79d9
	false	undefined	0							undefined	0	58e6309a09e55e10009c7afe		true	157668	313	-1	0	0	0	0	1	undefined	58e62ffd09e55e10009c79d9
	false	undefined	0							undefined	0	58e6309b09e55e10009c7aff		true	158267	314	-1	0	0	0	0	1	undefined	58e62ffd09e55e10009c79d9
	false	undefined	0							undefined	0	58e6309c09e55e10009c7b00		true	158737	315	-1	0	0	0	0	1	undefined	58e62ffd09e55e10009c79d9
	false	undefined	0							undefined	0	58e6309c09e55e10009c7b01		true	159263	316	-1	0	0	0	0	1	undefined	58e62ffd09e55e10009c79d9
	false	undefined	0							undefined	0	58e6309d09e55e10009c7b02		true	159798	317	-1	0	0	0	0	1	undefined	58e62ffd09e55e10009c79d9
	false	undefined	0							undefined	0	58e6309d09e55e10009c7b03		true	160403	318	-1	0	0	0	0	1	undefined	58e62ffd09e55e10009c79d9
	false	undefined	0							undefined	0	58e6309e09e55e10009c7b04		true	160950	319	-1	0	0	0	0	1	undefined	58e62ffd09e55e10009c79d9
	false	undefined	0							undefined	0	58e6309e09e55e10009c7b05		true	161474	320	-1	0	0	0	0	1	undefined	58e62ffd09e55e10009c79d9
	false	undefined	0							undefined	0	58e6309f09e55e10009c7b06		true	162012	321	-1	0	0	0	0	1	undefined	58e62ffd09e55e10009c79d9
	false	undefined	0							undefined	0	58e6309f09e55e10009c7b07		true	162495	322	-1	0	0	0	0	1	undefined	58e62ffd09e55e10009c79d9
	false	undefined	0							undefined	0	58e630a009e55e10009c7b08		true	163078	323	-1	0	0	0	0	1	undefined	58e62ffd09e55e10009c79d9
	false	undefined	0							undefined	0	58e630a009e55e10009c7b09		true	163652	324	-1	0	0	0	0	1	undefined	58e62ffd09e55e10009c79d9
	false	undefined	0							undefined	0	58e630a109e55e10009c7b0a		true	164085	325	-1	0	0	0	0	1	undefined	58e62ffd09e55e10009c79d9
	false	undefined	0							undefined	0	58e630a109e55e10009c7b0b		true	164608	326	-1	0	0	0	0	1	undefined	58e62ffd09e55e10009c79d9
	false	undefined	0							undefined	0	58e630a209e55e10009c7b0c		true	165138	327	-1	0	0	0	0	1	undefined	58e62ffd09e55e10009c79d9
	false	undefined	0							undefined	0	58e630a209e55e10009c7b0d		true	165683	328	-1	0	0	0	0	1	undefined	58e62ffd09e55e10009c79d9
	false	undefined	0							undefined	0	58e630a309e55e10009c7b0e		true	166215	329	-1	0	0	0	0	1	undefined	58e62ffd09e55e10009c79d9
	false	undefined	0							undefined	0	58e630a409e55e10009c7b0f		true	166755	330	-1	0	0	0	0	1	undefined	58e62ffd09e55e10009c79d9
	false	undefined	0							undefined	0	58e630a409e55e10009c7b10		true	167283	331	-1	0	0	0	0	1	undefined	58e62ffd09e55e10009c79d9
	false	undefined	0							undefined	0	58e630a509e55e10009c7b11		true	167821	332	-1	0	0	0	0	1	undefined	58e62ffd09e55e10009c79d9
	false	undefined	0							undefined	0	58e630a509e55e10009c7b12		true	168360	333	-1	0	0	0	0	1	undefined	58e62ffd09e55e10009c79d9
	false	undefined	0							undefined	0	58e630a609e55e10009c7b13		true	168889	334	106	0	0	0	0	1	undefined	58e62ffd09e55e10009c79d9
	false	undefined	0							undefined	0	58e630a609e55e10009c7b14		false	169355	335	97	0	0	0	0	1	undefined	58e62ffd09e55e10009c79d9
	false	undefined	0							undefined	0	58e630a709e55e10009c7b15		false	169964	336	90	0	0	0	0	1	undefined	58e62ffd09e55e10009c79d9
	false	undefined	0							undefined	0	58e630a709e55e10009c7b16		false	170482	340	107	0	0	0	0	1	undefined	58e62ffd09e55e10009c79d9
	false	undefined	0							undefined	0	58e630a809e55e10009c7b17		false	170962	341	106	0	0	0	0	1	undefined	58e62ffd09e55e10009c79d9
	false	undefined	0							undefined	0	58e630a809e55e10009c7b18		false	171492	342	109	0	0	0	0	1	undefined	58e62ffd09e55e10009c79d9
	false	undefined	0							undefined	0	58e630a909e55e10009c7b19		false	171978	343	111	0	0	0	0	1	undefined	58e62ffd09e55e10009c79d9
	false	undefined	0							undefined	0	58e630a909e55e10009c7b1a		false	172565	344	110	0	0	0	0	1	undefined	58e62ffd09e55e10009c79d9
	false	undefined	0							undefined	0	58e630aa09e55e10009c7b1b		false	173101	345	110	0	0	0	0	1	undefined	58e62ffd09e55e10009c79d9
	false	undefined	0							undefined	0	58e630aa09e55e10009c7b1c		false	173630	346	111	0	0	0	0	1	undefined	58e62ffd09e55e10009c79d9
	false	undefined	0							undefined	0	58e630ab09e55e10009c7b1d		false	174149	347	112	0	0	0	0	1	undefined	58e62ffd09e55e10009c79d9
	false	undefined	0							undefined	0	58e630ab09e55e10009c7b1e		false	174693	348	108	0	0	0	0	1	undefined	58e62ffd09e55e10009c79d9
	false	undefined	0							undefined	0	58e630ac09e55e10009c7b1f		false	175234	349	105	0	0	0	0	1	undefined	58e62ffd09e55e10009c79d9
	false	undefined	0							undefined	0	58e630ad09e55e10009c7b20		true	175764	350	106	0	0	0	0	1	undefined	58e62ffd09e55e10009c79d9
	false	undefined	0							undefined	0	58e630ad09e55e10009c7b21		true	176239	351	110	0	0	0	0	1	undefined	58e62ffd09e55e10009c79d9
	false	undefined	0							undefined	0	58e630ae09e55e10009c7b22		false	176781	352	111	0	0	0	0	1	undefined	58e62ffd09e55e10009c79d9
	false	undefined	0							undefined	0	58e630ae09e55e10009c7b23		false	177376	353	107	0	0	0	0	1	undefined	58e62ffd09e55e10009c79d9
	false	undefined	0							undefined	0	58e630af09e55e10009c7b24		false	177916	354	105	0	0	0	0	1	undefined	58e62ffd09e55e10009c79d9
	false	undefined	0							undefined	0	58e630af09e55e10009c7b25		false	178434	355	109	0	0	0	0	1	undefined	58e62ffd09e55e10009c79d9
	false	undefined	0							undefined	0	58e630b009e55e10009c7b26		false	178961	356	112	0	0	0	0	1	undefined	58e62ffd09e55e10009c79d9
	false	undefined	0							undefined	0	58e630b009e55e10009c7b27		false	179512	357	111	0	0	0	0	1	undefined	58e62ffd09e55e10009c79d9
	false	undefined	0							undefined	0	58e630b109e55e10009c7b28		false	180029	358	110	0	0	0	0	1	undefined	58e62ffd09e55e10009c79d9
	false	undefined	0							undefined	0	58e630b109e55e10009c7b29		false	180566	359	109	0	0	0	0	1	undefined	58e62ffd09e55e10009c79d9
	false	undefined	0							undefined	0	58e630b209e55e10009c7b2a		false	181057	360	109	0	0	0	0	1	undefined	58e62ffd09e55e10009c79d9
	false	undefined	0							undefined	0	58e630b209e55e10009c7b2b		false	181656	361	110	0	0	0	0	1	undefined	58e62ffd09e55e10009c79d9
	false	undefined	0							undefined	0	58e630b309e55e10009c7b2c		false	182249	362	110	0	0	0	0	1	undefined	58e62ffd09e55e10009c79d9
	false	undefined	0							undefined	0	58e630b409e55e10009c7b2d		false	182778	363	110	0	0	0	0	1	undefined	58e62ffd09e55e10009c79d9
	false	undefined	0							undefined	0	58e630b409e55e10009c7b2e		false	183328	364	108	0	0	0	0	1	undefined	58e62ffd09e55e10009c79d9
	false	undefined	0							undefined	0	58e630b509e55e10009c7b2f		false	183855	365	107	0	0	0	0	1	undefined	58e62ffd09e55e10009c79d9
	false	undefined	0							undefined	0	58e630b509e55e10009c7b30		false	184378	366	109	0	0	0	0	1	undefined	58e62ffd09e55e10009c79d9
	false	undefined	0							undefined	0	58e630b609e55e10009c7b31		false	184917	367	108	0	0	0	0	1	undefined	58e62ffd09e55e10009c79d9
	false	undefined	0							undefined	0	58e630b609e55e10009c7b32		false	185464	368	107	0	0	0	0	1	undefined	58e62ffd09e55e10009c79d9
	false	undefined	0							undefined	0	58e630b709e55e10009c7b33		false	185927	369	106	0	0	0	0	1	undefined	58e62ffd09e55e10009c79d9
	false	undefined	0							undefined	0	58e630b709e55e10009c7b34		false	186524	370	109	0	0	0	0	1	undefined	58e62ffd09e55e10009c79d9
	false	undefined	0							undefined	0	58e630b809e55e10009c7b35		false	187059	371	111	0	0	0	0	1	undefined	58e62ffd09e55e10009c79d9
	false	undefined	0							undefined	0	58e630b809e55e10009c7b36		false	187525	372	109	0	0	0	0	1	undefined	58e62ffd09e55e10009c79d9
	false	undefined	0							undefined	0	58e630b909e55e10009c7b37		true	188133	373	108	0	0	0	0	1	undefined	58e62ffd09e55e10009c79d9
	false	undefined	0							undefined	0	58e630b909e55e10009c7b38		true	188662	374	108	0	0	0	0	1	undefined	58e62ffd09e55e10009c79d9
	false	undefined	0							undefined	0	58e630ba09e55e10009c7b39		true	189194	375	110	0	0	0	0	1	undefined	58e62ffd09e55e10009c79d9
	false	undefined	0							undefined	0	58e630bb09e55e10009c7b3a		true	189737	376	109	0	0	0	0	1	undefined	58e62ffd09e55e10009c79d9
	false	undefined	0							undefined	0	58e630bb09e55e10009c7b3b		false	190342	377	114	0	0	0	0	1	undefined	58e62ffd09e55e10009c79d9
	false	undefined	0							undefined	0	58e630bc09e55e10009c7b3c		false	190871	378	117	0	0	0	0	1	undefined	58e62ffd09e55e10009c79d9
	false	undefined	0							undefined	0	58e630bc09e55e10009c7b3d		false	191401	379	112	0	0	0	0	1	undefined	58e62ffd09e55e10009c79d9
	false	undefined	0							undefined	0	58e630bd09e55e10009c7b3e		false	191985	380	110	0	0	0	0	1	undefined	58e62ffd09e55e10009c79d9
	false	undefined	0							undefined	0	58e630bd09e55e10009c7b3f		false	192535	381	113	0	0	0	0	1	undefined	58e62ffd09e55e10009c79d9
	false	undefined	0							undefined	0	58e630be09e55e10009c7b40		false	193072	382	111	0	0	0	0	1	undefined	58e62ffd09e55e10009c79d9
	false	undefined	0							undefined	0	58e630be09e55e10009c7b41		false	193604	383	111	0	0	0	0	1	undefined	58e62ffd09e55e10009c79d9
	false	undefined	0							undefined	0	58e630bf09e55e10009c7b42		false	194144	384	110	0	0	0	0	1	undefined	58e62ffd09e55e10009c79d9
	false	undefined	0							undefined	0	58e630bf09e55e10009c7b43		false	194680	385	111	0	0	0	0	1	undefined	58e62ffd09e55e10009c79d9
	false	undefined	0							undefined	0	58e630c009e55e10009c7b44		false	195279	386	111	0	0	0	0	1	undefined	58e62ffd09e55e10009c79d9
	false	undefined	0							undefined	0	58e630c109e55e10009c7b45		false	195812	387	107	0	0	0	0	1	undefined	58e62ffd09e55e10009c79d9
	false	undefined	0							undefined	0	58e630c109e55e10009c7b46		false	196301	388	108	0	0	0	0	1	undefined	58e62ffd09e55e10009c79d9
	false	undefined	0							undefined	0	58e630c209e55e10009c7b47		false	196862	389	106	0	0	0	0	1	undefined	58e62ffd09e55e10009c79d9
	false	undefined	0							undefined	0	58e630c209e55e10009c7b48		false	197380	390	107	0	0	0	0	1	undefined	58e62ffd09e55e10009c79d9
	false	undefined	0							undefined	0	58e630c309e55e10009c7b49		false	197963	391	108	0	0	0	0	1	undefined	58e62ffd09e55e10009c79d9
	false	undefined	0							undefined	0	58e630c309e55e10009c7b4a		false	198480	392	109	0	0	0	0	1	undefined	58e62ffd09e55e10009c79d9
	false	undefined	0							undefined	0	58e630c409e55e10009c7b4b		false	198967	393	108	0	0	0	0	1	undefined	58e62ffd09e55e10009c79d9
	false	undefined	0							undefined	0	58e630c409e55e10009c7b4c		false	199496	394	105	0	0	0	0	1	undefined	58e62ffd09e55e10009c79d9
	false	undefined	0							undefined	0	58e630c509e55e10009c7b4d		false	200021	395	106	0	0	0	0	1	undefined	58e62ffd09e55e10009c79d9
	false	undefined	0							undefined	0	58e630c509e55e10009c7b4e		false	200545	396	106	0	0	0	0	1	undefined	58e62ffd09e55e10009c79d9
	false	undefined	0							undefined	0	58e630c609e55e10009c7b4f		false	201082	397	109	0	0	0	0	1	undefined	58e62ffd09e55e10009c79d9
	false	undefined	0							undefined	0	58e630c609e55e10009c7b50		false	201634	398	108	0	0	0	0	1	undefined	58e62ffd09e55e10009c79d9
	false	undefined	0							undefined	0	58e630c709e55e10009c7b51		false	202225	399	108	0	0	0	0	1	undefined	58e62ffd09e55e10009c79d9
	false	undefined	0							undefined	0	58e630c809e55e10009c7b52		false	202758	400	109	0	0	0	0	1	undefined	58e62ffd09e55e10009c79d9
	false	undefined	0							undefined	0	58e630c809e55e10009c7b53		false	203226	401	104	0	0	0	0	1	undefined	58e62ffd09e55e10009c79d9
	false	undefined	0							undefined	0	58e630c909e55e10009c7b54		false	203771	402	104	0	0	0	0	1	undefined	58e62ffd09e55e10009c79d9
	false	undefined	0							undefined	0	58e630c909e55e10009c7b55		false	204279	403	107	0	0	0	0	1	undefined	58e62ffd09e55e10009c79d9
	false	undefined	0							undefined	0	58e630ca09e55e10009c7b56		false	204830	404	110	0	0	0	0	1	undefined	58e62ffd09e55e10009c79d9
	false	undefined	0							undefined	0	58e630ca09e55e10009c7b57		false	205425	405	111	0	0	0	0	1	undefined	58e62ffd09e55e10009c79d9
	false	undefined	0							undefined	0	58e630cb09e55e10009c7b58		false	205961	406	111	0	0	0	0	1	undefined	58e62ffd09e55e10009c79d9
	false	undefined	0							undefined	0	58e630cb09e55e10009c7b59		false	206513	407	113	0	0	0	0	1	undefined	58e62ffd09e55e10009c79d9
	false	undefined	0							undefined	0	58e630cc09e55e10009c7b5a		false	207039	408	113	0	0	0	0	1	undefined	58e62ffd09e55e10009c79d9
	false	undefined	0							undefined	0	58e630cc09e55e10009c7b5b		false	207564	409	113	0	0	0	0	1	undefined	58e62ffd09e55e10009c79d9
	false	undefined	0							undefined	0	58e630cd09e55e10009c7b5c		false	208101	410	112	0	0	0	0	1	undefined	58e62ffd09e55e10009c79d9
	false	undefined	0							undefined	0	58e630cd09e55e10009c7b5d		false	208646	411	106	0	0	0	0	1	undefined	58e62ffd09e55e10009c79d9
	false	undefined	0							undefined	0	58e630ce09e55e10009c7b5e		false	209177	412	103	0	0	0	0	1	undefined	58e62ffd09e55e10009c79d9
	false	undefined	0							undefined	0	58e630ce09e55e10009c7b5f		false	209696	413	104	0	0	0	0	1	undefined	58e62ffd09e55e10009c79d9
	false	undefined	0							undefined	0	58e630cf09e55e10009c7b60		false	210198	414	107	0	0	0	0	1	undefined	58e62ffd09e55e10009c79d9
	false	undefined	0							undefined	0	58e630d009e55e10009c7b61		false	210768	415	108	0	0	0	0	1	undefined	58e62ffd09e55e10009c79d9
	false	undefined	0							undefined	0	58e630d009e55e10009c7b62		false	211381	416	111	0	0	0	0	1	undefined	58e62ffd09e55e10009c79d9
	false	undefined	0							undefined	0	58e630d109e55e10009c7b63		false	211931	417	112	0	0	0	0	1	undefined	58e62ffd09e55e10009c79d9
	false	undefined	0							undefined	0	58e630d109e55e10009c7b64		false	212442	418	111	0	0	0	0	1	undefined	58e62ffd09e55e10009c79d9
	false	undefined	0							undefined	0	58e630d209e55e10009c7b65		false	212899	419	107	0	0	0	0	1	undefined	58e62ffd09e55e10009c79d9
	false	undefined	0							undefined	0	58e630d209e55e10009c7b66		false	213526	420	104	0	0	0	0	1	undefined	58e62ffd09e55e10009c79d9
	false	undefined	0							undefined	0	58e630d309e55e10009c7b67		false	214055	421	105	0	0	0	0	1	undefined	58e62ffd09e55e10009c79d9
	false	undefined	0							undefined	0	58e630d309e55e10009c7b68		false	214582	422	107	0	0	0	0	1	undefined	58e62ffd09e55e10009c79d9
	false	undefined	0							undefined	0	58e630d409e55e10009c7b69		false	215123	423	106	0	0	0	0	1	undefined	58e62ffd09e55e10009c79d9
	false	undefined	0							undefined	0	58e630d509e55e10009c7b6a		false	215712	424	110	0	0	0	0	1	undefined	58e62ffd09e55e10009c79d9
	false	undefined	0							undefined	0	58e630d509e55e10009c7b6b		false	216191	425	111	0	0	0	0	1	undefined	58e62ffd09e55e10009c79d9
	false	undefined	0							undefined	0	58e630d609e55e10009c7b6c		false	216722	426	109	0	0	0	0	1	undefined	58e62ffd09e55e10009c79d9
	false	undefined	0							undefined	0	58e630d609e55e10009c7b6d		false	217253	427	109	0	0	0	0	1	undefined	58e62ffd09e55e10009c79d9
	false	undefined	0							undefined	0	58e630d709e55e10009c7b6e		false	217773	428	109	0	0	0	0	1	undefined	58e62ffd09e55e10009c79d9
	false	undefined	0							undefined	0	58e630d709e55e10009c7b6f		false	218321	429	110	0	0	0	0	1	undefined	58e62ffd09e55e10009c79d9
	false	undefined	0							undefined	0	58e630d809e55e10009c7b70		false	218863	430	107	0	0	0	0	1	undefined	58e62ffd09e55e10009c79d9
	false	undefined	0							undefined	0	58e630d809e55e10009c7b71		false	219392	431	112	0	0	0	0	1	undefined	58e62ffd09e55e10009c79d9
	false	undefined	0							undefined	0	58e630d909e55e10009c7b72		false	219923	432	117	0	0	0	0	1	undefined	58e62ffd09e55e10009c79d9
	false	undefined	0							undefined	0	58e630d909e55e10009c7b73		false	220457	433	116	0	0	0	0	1	undefined	58e62ffd09e55e10009c79d9
	false	undefined	0							undefined	0	58e630da09e55e10009c7b74		false	220995	434	108	0	0	0	0	1	undefined	58e62ffd09e55e10009c79d9
	false	undefined	0							undefined	0	58e630da09e55e10009c7b75		false	221533	435	110	0	0	0	0	1	undefined	58e62ffd09e55e10009c79d9
	false	undefined	0							undefined	0	58e630db09e55e10009c7b76		false	222133	436	116	0	0	0	0	1	undefined	58e62ffd09e55e10009c79d9
	false	undefined	0							undefined	0	58e630db09e55e10009c7b77		false	222593	437	114	0	0	0	0	1	undefined	58e62ffd09e55e10009c79d9
	false	undefined	0							undefined	0	58e630dc09e55e10009c7b78		false	223117	438	112	0	0	0	0	1	undefined	58e62ffd09e55e10009c79d9
	false	undefined	0							undefined	0	58e630dc09e55e10009c7b79		false	223664	439	111	0	0	0	0	1	undefined	58e62ffd09e55e10009c79d9
	false	undefined	0							undefined	0	58e630dd09e55e10009c7b7a		false	224203	440	110	0	0	0	0	1	undefined	58e62ffd09e55e10009c79d9
	false	undefined	0							undefined	0	58e630de09e55e10009c7b7b		false	224737	441	109	0	0	0	0	1	undefined	58e62ffd09e55e10009c79d9
	false	undefined	0							undefined	0	58e630de09e55e10009c7b7c		false	225271	442	107	0	0	0	0	1	undefined	58e62ffd09e55e10009c79d9
	false	undefined	0							undefined	0	58e630df09e55e10009c7b7d		false	225877	443	110	0	0	0	0	1	undefined	58e62ffd09e55e10009c79d9
	false	undefined	0							undefined	0	58e630df09e55e10009c7b7e		false	226342	444	109	0	0	0	0	1	undefined	58e62ffd09e55e10009c79d9
	false	undefined	0							undefined	0	58e630e009e55e10009c7b7f		false	226872	445	110	0	0	0	0	1	undefined	58e62ffd09e55e10009c79d9
	false	undefined	0							undefined	0	58e630e009e55e10009c7b80		false	227463	446	112	0	0	0	0	1	undefined	58e62ffd09e55e10009c79d9
	false	undefined	0							undefined	0	58e630e109e55e10009c7b81		false	228021	447	110	0	0	0	0	1	undefined	58e62ffd09e55e10009c79d9
	false	undefined	0							undefined	0	58e630e109e55e10009c7b82		false	228547	448	112	0	0	0	0	1	undefined	58e62ffd09e55e10009c79d9
	false	undefined	0							undefined	0	58e630e209e55e10009c7b83		false	229081	449	111	0	0	0	0	1	undefined	58e62ffd09e55e10009c79d9
	false	undefined	0							undefined	0	58e630e209e55e10009c7b84		false	229611	450	112	0	0	0	0	1	undefined	58e62ffd09e55e10009c79d9
	false	undefined	0							undefined	0	58e630e309e55e10009c7b85		false	230144	451	109	0	0	0	0	1	undefined	58e62ffd09e55e10009c79d9
	false	undefined	0							undefined	0	58e630e309e55e10009c7b86		false	230681	452	104	0	0	0	0	1	undefined	58e62ffd09e55e10009c79d9
	false	undefined	0							undefined	0	58e630e409e55e10009c7b87		false	231220	453	108	0	0	0	0	1	undefined	58e62ffd09e55e10009c79d9
	false	undefined	0							undefined	0	58e630e509e55e10009c7b88		false	231746	454	112	0	0	0	0	1	undefined	58e62ffd09e55e10009c79d9
	false	undefined	0							undefined	0	58e630e509e55e10009c7b89		false	232287	455	115	0	0	0	0	1	undefined	58e62ffd09e55e10009c79d9
	false	undefined	0							undefined	0	58e630e609e55e10009c7b8a		false	232750	456	113	0	0	0	0	1	undefined	58e62ffd09e55e10009c79d9
	false	undefined	0							undefined	0	58e630e609e55e10009c7b8b		false	233276	457	113	0	0	0	0	1	undefined	58e62ffd09e55e10009c79d9
	false	undefined	0							undefined	0	58e630e709e55e10009c7b8c		false	233817	458	113	0	0	0	0	1	undefined	58e62ffd09e55e10009c79d9
	false	undefined	0							undefined	0	58e630e709e55e10009c7b8d		false	234356	459	111	0	0	0	0	1	undefined	58e62ffd09e55e10009c79d9
	false	undefined	0							undefined	0	58e630e809e55e10009c7b8e		false	234955	460	111	0	0	0	0	1	undefined	58e62ffd09e55e10009c79d9
	false	undefined	0							undefined	0	58e630e809e55e10009c7b8f		false	235498	461	109	0	0	0	0	1	undefined	58e62ffd09e55e10009c79d9
	false	undefined	0							undefined	0	58e630e909e55e10009c7b90		false	236026	462	112	0	0	0	0	1	undefined	58e62ffd09e55e10009c79d9
	false	undefined	0							undefined	0	58e630e909e55e10009c7b91		false	236553	463	114	0	0	0	0	1	undefined	58e62ffd09e55e10009c79d9
	false	undefined	0							undefined	0	58e630ea09e55e10009c7b92		false	237090	464	115	0	0	0	0	1	undefined	58e62ffd09e55e10009c79d9
	false	undefined	0							undefined	0	58e630ea09e55e10009c7b93		false	237549	465	114	0	0	0	0	1	undefined	58e62ffd09e55e10009c79d9
	false	undefined	0							undefined	0	58e630eb09e55e10009c7b94		false	238185	466	111	0	0	0	0	1	undefined	58e62ffd09e55e10009c79d9
	false	undefined	0							undefined	0	58e630ec09e55e10009c7b95		false	238765	467	108	0	0	0	0	1	undefined	58e62ffd09e55e10009c79d9
	false	undefined	0							undefined	0	58e630ec09e55e10009c7b96		true	239287	468	95	0	0	0	0	1	undefined	58e62ffd09e55e10009c79d9
	false	undefined	0							undefined	0	58e630ed09e55e10009c7b97		true	239763	469	95	0	0	0	0	1	undefined	58e62ffd09e55e10009c79d9
	false	undefined	0							undefined	0	58e630ed09e55e10009c7b98		true	240312	470	95	0	0	0	0	1	undefined	58e62ffd09e55e10009c79d9
	false	undefined	0							undefined	0	58e630ee09e55e10009c7b99		true	240840	471	112	0	0	0	0	1	undefined	58e62ffd09e55e10009c79d9
	false	undefined	0							undefined	0	58e630ee09e55e10009c7b9a		false	241369	472	113	0	0	0	0	1	undefined	58e62ffd09e55e10009c79d9
	false	undefined	0							undefined	0	58e630ef09e55e10009c7b9b		false	241897	473	111	0	0	0	0	1	undefined	58e62ffd09e55e10009c79d9
	false	undefined	0							undefined	0	58e630ef09e55e10009c7b9c		false	242434	474	111	0	0	0	0	1	undefined	58e62ffd09e55e10009c79d9
	false	undefined	0							undefined	0	58e630f009e55e10009c7b9d		false	242980	475	112	0	0	0	0	1	undefined	58e62ffd09e55e10009c79d9
	false	undefined	0							undefined	0	58e630f009e55e10009c7b9e		false	243516	476	112	0	0	0	0	1	undefined	58e62ffd09e55e10009c79d9
	false	undefined	0							undefined	0	58e630f109e55e10009c7b9f		false	244042	477	112	0	0	0	0	1	undefined	58e62ffd09e55e10009c79d9
	false	undefined	0							undefined	0	58e630f109e55e10009c7ba0		false	244572	478	111	0	0	0	0	1	undefined	58e62ffd09e55e10009c79d9
	false	undefined	0							undefined	0	58e630f209e55e10009c7ba1		false	245038	479	110	0	0	0	0	1	undefined	58e62ffd09e55e10009c79d9
	false	undefined	0							undefined	0	58e630f209e55e10009c7ba2		false	245559	480	109	0	0	0	0	1	undefined	58e62ffd09e55e10009c79d9
	false	undefined	0							undefined	0	58e630f309e55e10009c7ba3		false	246114	481	109	0	0	0	0	1	undefined	58e62ffd09e55e10009c79d9
	false	undefined	0							undefined	0	58e630f309e55e10009c7ba4		false	246581	482	107	0	0	0	0	1	undefined	58e62ffd09e55e10009c79d9
	false	undefined	0							undefined	0	58e630f409e55e10009c7ba5		false	247195	483	109	0	0	0	0	1	undefined	58e62ffd09e55e10009c79d9
	false	undefined	0							undefined	0	58e630f409e55e10009c7ba6		false	247725	484	110	0	0	0	0	1	undefined	58e62ffd09e55e10009c79d9
	false	undefined	0							undefined	0	58e630f509e55e10009c7ba7		false	248265	485	111	0	0	0	0	1	undefined	58e62ffd09e55e10009c79d9
	false	undefined	0							undefined	0	58e630f609e55e10009c7ba8		false	248777	486	110	0	0	0	0	1	undefined	58e62ffd09e55e10009c79d9
	false	undefined	0							undefined	0	58e630f609e55e10009c7ba9		false	249320	487	110	0	0	0	0	1	undefined	58e62ffd09e55e10009c79d9
	false	undefined	0							undefined	0	58e630f709e55e10009c7baa		false	249845	488	112	0	0	0	0	1	undefined	58e62ffd09e55e10009c79d9
	false	undefined	0							undefined	0	58e630f709e55e10009c7bab		false	250340	489	112	0	0	0	0	1	undefined	58e62ffd09e55e10009c79d9
	false	undefined	0							undefined	0	58e630f809e55e10009c7bac		false	250861	490	110	0	0	0	0	1	undefined	58e62ffd09e55e10009c79d9
	false	undefined	0							undefined	0	58e630f809e55e10009c7bad		false	251454	491	113	0	0	0	0	1	undefined	58e62ffd09e55e10009c79d9
	false	undefined	0							undefined	0	58e630f909e55e10009c7bae		false	251915	492	110	0	0	0	0	1	undefined	58e62ffd09e55e10009c79d9
	false	undefined	0							undefined	0	58e630f909e55e10009c7baf		false	252454	493	112	0	0	0	0	1	undefined	58e62ffd09e55e10009c79d9
	false	undefined	0							undefined	0	58e630fa09e55e10009c7bb0		false	252939	494	113	0	0	0	0	1	undefined	58e62ffd09e55e10009c79d9
	false	undefined	0							undefined	0	58e630fa09e55e10009c7bb1		false	253525	495	111	0	0	0	0	1	undefined	58e62ffd09e55e10009c79d9
	false	undefined	0							undefined	0	58e630fb09e55e10009c7bb2		false	254067	496	110	0	0	0	0	1	undefined	58e62ffd09e55e10009c79d9
	false	undefined	0							undefined	0	58e630fb09e55e10009c7bb3		false	254692	497	107	0	0	0	0	1	undefined	58e62ffd09e55e10009c79d9
	false	undefined	0							undefined	0	58e630fc09e55e10009c7bb4		false	255143	498	112	0	0	0	0	1	undefined	58e62ffd09e55e10009c79d9
	false	undefined	0							undefined	0	58e630fc09e55e10009c7bb5		false	255672	499	111	0	0	0	0	1	undefined	58e62ffd09e55e10009c79d9
	false	undefined	0							undefined	0	58e630fd09e55e10009c7bb6		false	256197	500	111	0	0	0	0	1	undefined	58e62ffd09e55e10009c79d9
	false	undefined	0							undefined	0	58e630fe09e55e10009c7bb7		false	256729	501	113	0	0	0	0	1	undefined	58e62ffd09e55e10009c79d9
	false	undefined	0							undefined	0	58e630fe09e55e10009c7bb8		false	257189	502	113	0	0	0	0	1	undefined	58e62ffd09e55e10009c79d9
	false	undefined	0							undefined	0	58e630ff09e55e10009c7bb9		false	257811	503	111	0	0	0	0	1	undefined	58e62ffd09e55e10009c79d9
	false	undefined	0							undefined	0	58e630ff09e55e10009c7bba		false	258334	504	109	0	0	0	0	1	undefined	58e62ffd09e55e10009c79d9
	false	undefined	0							undefined	0	58e6310009e55e10009c7bbb		false	258942	505	113	0	0	0	0	1	undefined	58e62ffd09e55e10009c79d9
	false	undefined	0							undefined	0	58e6310009e55e10009c7bbc		false	259470	506	113	0	0	0	0	1	undefined	58e62ffd09e55e10009c79d9
	false	undefined	0							undefined	0	58e6310109e55e10009c7bbd		false	260017	507	112	0	0	0	0	1	undefined	58e62ffd09e55e10009c79d9
	false	undefined	0							undefined	0	58e6310109e55e10009c7bbe		false	260548	508	112	0	0	0	0	1	undefined	58e62ffd09e55e10009c79d9
	false	undefined	0							undefined	0	58e6310209e55e10009c7bbf		false	261054	509	112	0	0	0	0	1	undefined	58e62ffd09e55e10009c79d9
	false	undefined	0							undefined	0	58e6310209e55e10009c7bc0		false	261594	510	113	0	0	0	0	1	undefined	58e62ffd09e55e10009c79d9
	false	undefined	0							undefined	0	58e6310309e55e10009c7bc1		false	262143	511	110	0	0	0	0	1	undefined	58e62ffd09e55e10009c79d9
	false	undefined	0							undefined	0	58e6310309e55e10009c7bc2		false	262669	512	110	0	0	0	0	1	undefined	58e62ffd09e55e10009c79d9
	false	undefined	0							undefined	0	58e6310409e55e10009c7bc3		false	263190	513	112	0	0	0	0	1	undefined	58e62ffd09e55e10009c79d9
	false	undefined	0							undefined	0	58e6310409e55e10009c7bc4		true	263720	514	114	0	0	0	0	1	undefined	58e62ffd09e55e10009c79d9
	false	undefined	0							undefined	0	58e6310509e55e10009c7bc5		true	264283	515	112	0	0	0	0	1	undefined	58e62ffd09e55e10009c79d9
	false	undefined	0							undefined	0	58e6310609e55e10009c7bc6		true	264812	516	112	0	0	0	0	1	undefined	58e62ffd09e55e10009c79d9
	false	undefined	0							undefined	0	58e6310609e55e10009c7bc7		true	265347	517	113	0	0	0	0	1	undefined	58e62ffd09e55e10009c79d9
	false	undefined	0							undefined	0	58e6310709e55e10009c7bc8		false	265896	518	113	0	0	0	0	1	undefined	58e62ffd09e55e10009c79d9
	false	undefined	0							undefined	0	58e6310709e55e10009c7bc9		false	266426	519	111	0	0	0	0	1	undefined	58e62ffd09e55e10009c79d9
	false	undefined	0							undefined	0	58e6310809e55e10009c7bca		false	266949	520	111	0	0	0	0	1	undefined	58e62ffd09e55e10009c79d9
	false	undefined	0							undefined	0	58e6310809e55e10009c7bcb		false	267547	521	111	0	0	0	0	1	undefined	58e62ffd09e55e10009c79d9
	false	undefined	0							undefined	0	58e6310909e55e10009c7bcc		false	268096	522	111	0	0	0	0	1	undefined	58e62ffd09e55e10009c79d9
	false	undefined	0							undefined	0	58e6310909e55e10009c7bcd		false	268608	523	113	0	0	0	0	1	undefined	58e62ffd09e55e10009c79d9
	false	undefined	0							undefined	0	58e6310a09e55e10009c7bce		false	269160	524	112	0	0	0	0	1	undefined	58e62ffd09e55e10009c79d9
	false	undefined	0							undefined	0	58e6310b09e55e10009c7bcf		false	269694	525	113	0	0	0	0	1	undefined	58e62ffd09e55e10009c79d9
	false	undefined	0							undefined	0	58e6310b09e55e10009c7bd0		false	270215	526	114	0	0	0	0	1	undefined	58e62ffd09e55e10009c79d9
	false	undefined	0							undefined	0	58e6310c09e55e10009c7bd1		false	270772	527	115	0	0	0	0	1	undefined	58e62ffd09e55e10009c79d9
	false	undefined	0							undefined	0	58e6310c09e55e10009c7bd2		false	271300	528	115	0	0	0	0	1	undefined	58e62ffd09e55e10009c79d9
	false	undefined	0							undefined	0	58e6310d09e55e10009c7bd3		false	271821	529	113	0	0	0	0	1	undefined	58e62ffd09e55e10009c79d9
	false	undefined	0							undefined	0	58e6310d09e55e10009c7bd4		false	272363	530	112	0	0	0	0	1	undefined	58e62ffd09e55e10009c79d9
	false	undefined	0							undefined	0	58e6310e09e55e10009c7bd5		false	272891	531	112	0	0	0	0	1	undefined	58e62ffd09e55e10009c79d9
	false	undefined	0							undefined	0	58e6310e09e55e10009c7bd6		false	273375	532	109	0	0	0	0	1	undefined	58e62ffd09e55e10009c79d9
	false	undefined	0							undefined	0	58e6310f09e55e10009c7bd7		false	273893	533	112	0	0	0	0	1	undefined	58e62ffd09e55e10009c79d9
	false	undefined	0							undefined	0	58e6310f09e55e10009c7bd8		false	274387	534	113	0	0	0	0	1	undefined	58e62ffd09e55e10009c79d9
	false	undefined	0							undefined	0	58e6311009e55e10009c7bd9		false	274962	535	113	0	0	0	0	1	undefined	58e62ffd09e55e10009c79d9
	false	undefined	0							undefined	0	58e6311009e55e10009c7bda		false	275499	536	111	0	0	0	0	1	undefined	58e62ffd09e55e10009c79d9
	false	undefined	0							undefined	0	58e6311109e55e10009c7bdb		false	276050	537	111	0	0	0	0	1	undefined	58e62ffd09e55e10009c79d9
	false	undefined	0							undefined	0	58e6311109e55e10009c7bdc		false	276645	538	116	0	0	0	0	1	undefined	58e62ffd09e55e10009c79d9
	false	undefined	0							undefined	0	58e6311209e55e10009c7bdd		false	277171	539	116	0	0	0	0	1	undefined	58e62ffd09e55e10009c79d9
	false	undefined	0							undefined	0	58e6311309e55e10009c7bde		false	277707	540	115	0	0	0	0	1	undefined	58e62ffd09e55e10009c79d9
	false	undefined	0							undefined	0	58e6311309e55e10009c7bdf		false	278174	541	113	0	0	0	0	1	undefined	58e62ffd09e55e10009c79d9
	false	undefined	0							undefined	0	58e6311409e55e10009c7be0		false	278717	542	115	0	0	0	0	1	undefined	58e62ffd09e55e10009c79d9
	false	undefined	0							undefined	0	58e6311409e55e10009c7be1		false	279246	543	112	0	0	0	0	1	undefined	58e62ffd09e55e10009c79d9
	false	undefined	0							undefined	0	58e6311509e55e10009c7be2		true	279760	544	111	0	0	0	0	1	undefined	58e62ffd09e55e10009c79d9
	false	undefined	0							undefined	0	58e6311509e55e10009c7be3		false	280391	545	112	0	0	0	0	1	undefined	58e62ffd09e55e10009c79d9
	false	undefined	0							undefined	0	58e6311609e55e10009c7be4		false	280834	546	110	0	0	0	0	1	undefined	58e62ffd09e55e10009c79d9
	false	undefined	0							undefined	0	58e6311609e55e10009c7be5		false	281385	547	115	0	0	0	0	1	undefined	58e62ffd09e55e10009c79d9
	false	undefined	0							undefined	0	58e6311709e55e10009c7be6		false	281861	548	115	0	0	0	0	1	undefined	58e62ffd09e55e10009c79d9
	false	undefined	0							undefined	0	58e6311709e55e10009c7be7		false	282450	549	114	0	0	0	0	1	undefined	58e62ffd09e55e10009c79d9
	false	undefined	0							undefined	0	58e6311809e55e10009c7be8		false	282971	550	115	0	0	0	0	1	undefined	58e62ffd09e55e10009c79d9
	false	undefined	0							undefined	0	58e6311809e55e10009c7be9		false	283525	551	115	0	0	0	0	1	undefined	58e62ffd09e55e10009c79d9
	false	undefined	0							undefined	0	58e6311909e55e10009c7bea		false	284056	552	116	0	0	0	0	1	undefined	58e62ffd09e55e10009c79d9
	false	undefined	0							undefined	0	58e6311a09e55e10009c7beb		false	284656	553	115	0	0	0	0	1	undefined	58e62ffd09e55e10009c79d9
	false	undefined	0							undefined	0	58e6311a09e55e10009c7bec		false	285134	554	111	0	0	0	0	1	undefined	58e62ffd09e55e10009c79d9
	false	undefined	0							undefined	0	58e6311a09e55e10009c7bed		false	285663	555	110	0	0	0	0	1	undefined	58e62ffd09e55e10009c79d9
	false	undefined	0							undefined	0	58e6311b09e55e10009c7bee		false	286189	556	109	0	0	0	0	1	undefined	58e62ffd09e55e10009c79d9
	false	undefined	0							undefined	0	58e6311c09e55e10009c7bef		false	286725	557	113	0	0	0	0	1	undefined	58e62ffd09e55e10009c79d9
	false	undefined	0							undefined	0	58e6311c09e55e10009c7bf0		false	287191	558	111	0	0	0	0	1	undefined	58e62ffd09e55e10009c79d9
	false	undefined	0							undefined	0	58e6311d09e55e10009c7bf1		true	287723	559	104	0	0	0	0	1	undefined	58e62ffd09e55e10009c79d9
	false	undefined	0							undefined	0	58e6311d09e55e10009c7bf2		true	288252	560	72	0	0	0	0	1	undefined	58e62ffd09e55e10009c79d9
	false	undefined	0							undefined	0	58e6311e09e55e10009c7bf3		true	288797	561	60	0	0	0	0	1	undefined	58e62ffd09e55e10009c79d9
	false	undefined	0							undefined	0	58e6311e09e55e10009c7bf4		true	289327	562	61	0	0	0	0	1	undefined	58e62ffd09e55e10009c79d9
	false	undefined	0							undefined	0	58e6311f09e55e10009c7bf5		true	289802	566	61	0	0	0	0	1	undefined	58e62ffd09e55e10009c79d9
	false	undefined	0							undefined	0	58e6311f09e55e10009c7bf6		true	290335	567	61	0	0	0	0	1	undefined	58e62ffd09e55e10009c79d9
	false	undefined	0							undefined	0	58e6312009e55e10009c7bf7		true	290878	568	60	0	0	0	0	1	undefined	58e62ffd09e55e10009c79d9
	false	undefined	0							undefined	0	58e6312009e55e10009c7bf8		true	291385	569	59	0	0	0	0	1	undefined	58e62ffd09e55e10009c79d9
	false	undefined	0							undefined	0	58e6312109e55e10009c7bf9		true	291935	570	61	0	0	0	0	1	undefined	58e62ffd09e55e10009c79d9
	false	undefined	0							undefined	0	58e6312109e55e10009c7bfa		true	292454	571	72	0	0	0	0	1	undefined	58e62ffd09e55e10009c79d9
	false	undefined	0							undefined	0	58e6312209e55e10009c7bfb		true	293020	572	73	0	0	0	0	1	undefined	58e62ffd09e55e10009c79d9
	false	undefined	0							undefined	0	58e6312209e55e10009c7bfc		true	293612	582	60	0	0	0	0	1	undefined	58e62ffd09e55e10009c79d9
	false	undefined	0							undefined	0	58e6312309e55e10009c7bfd		true	294074	583	60	0	0	0	0	1	undefined	58e62ffd09e55e10009c79d9
	false	undefined	0							undefined	0	58e6312309e55e10009c7bfe		true	294587	584	60	0	0	0	0	1	undefined	58e62ffd09e55e10009c79d9
	false	undefined	0							undefined	0	58e6312409e55e10009c7bff		true	295131	585	54	0	0	0	0	1	undefined	58e62ffd09e55e10009c79d9
	false	undefined	0							undefined	0	58e6312409e55e10009c7c00		true	295687	586	62	0	0	0	0	1	undefined	58e62ffd09e55e10009c79d9
	false	undefined	0							undefined	0	58e6312509e55e10009c7c01		true	296220	587	65	0	0	0	0	1	undefined	58e62ffd09e55e10009c79d9
	false	undefined	0							undefined	0	58e6312609e55e10009c7c02		true	296751	588	58	0	0	0	0	1	undefined	58e62ffd09e55e10009c79d9
	false	undefined	0							undefined	0	58e6312609e55e10009c7c03		true	297280	589	56	0	0	0	0	1	undefined	58e62ffd09e55e10009c79d9
	false	undefined	0							undefined	0	58e6312709e55e10009c7c04		true	297813	590	56	0	0	0	0	1	undefined	58e62ffd09e55e10009c79d9
	false	undefined	0							undefined	0	58e6312709e55e10009c7c05		true	298277	591	56	0	0	0	0	1	undefined	58e62ffd09e55e10009c79d9
	false	undefined	0							undefined	0	58e6312809e55e10009c7c06		true	298828	592	56	0	0	0	0	1	undefined	58e62ffd09e55e10009c79d9
	false	undefined	0							undefined	0	58e6312809e55e10009c7c07		true	299347	593	56	0	0	0	0	1	undefined	58e62ffd09e55e10009c79d9
	false	undefined	0							undefined	0	58e6312909e55e10009c7c08		true	299887	594	-1	0	0	0	0	1	undefined	58e62ffd09e55e10009c79d9
	false	undefined	0							undefined	0	58e6312909e55e10009c7c09		true	300418	595	-1	0	0	0	0	1	undefined	58e62ffd09e55e10009c79d9
	false	undefined	0							undefined	0	58e6312a09e55e10009c7c0a		true	300951	596	-1	0	0	0	0	1	undefined	58e62ffd09e55e10009c79d9
	false	undefined	0							undefined	0	58e6312a09e55e10009c7c0b		true	301499	597	-1	0	0	0	0	1	undefined	58e62ffd09e55e10009c79d9
	false	undefined	0							undefined	0	58e6312b09e55e10009c7c0c		true	302027	598	75	0	0	0	0	1	undefined	58e62ffd09e55e10009c79d9
	false	undefined	0							undefined	0	58e6312b09e55e10009c7c0d		true	302554	599	87	0	0	0	0	1	undefined	58e62ffd09e55e10009c79d9
	false	undefined	0							undefined	0	58e6312c09e55e10009c7c0e		true	303017	600	94	0	0	0	0	1	undefined	58e62ffd09e55e10009c79d9
	false	undefined	0							undefined	0	58e6312c09e55e10009c7c0f		true	303546	604	60	0	0	0	0	1	undefined	58e62ffd09e55e10009c79d9
	false	undefined	0							undefined	0	58e6312d09e55e10009c7c10		true	304091	605	-1	0	0	0	0	1	undefined	58e62ffd09e55e10009c79d9
	false	undefined	0							undefined	0	58e6312d09e55e10009c7c11		true	304628	606	-1	0	0	0	0	1	undefined	58e62ffd09e55e10009c79d9
	false	undefined	0							undefined	0	58e6312e09e55e10009c7c12		true	305165	607	-1	0	0	0	0	1	undefined	58e62ffd09e55e10009c79d9
	false	undefined	0							undefined	0	58e6312e09e55e10009c7c13		true	305694	608	-1	0	0	0	0	1	undefined	58e62ffd09e55e10009c79d9
	false	undefined	0							undefined	0	58e6312f09e55e10009c7c14		true	306178	609	-1	0	0	0	0	1	undefined	58e62ffd09e55e10009c79d9
	false	undefined	0							undefined	0	58e6313009e55e10009c7c15		true	306779	610	-1	0	0	0	0	1	undefined	58e62ffd09e55e10009c79d9
	false	undefined	0							undefined	0	58e6313009e55e10009c7c16		true	307305	611	-1	0	0	0	0	1	undefined	58e62ffd09e55e10009c79d9
	false	undefined	0							undefined	0	58e6313109e55e10009c7c17		true	307833	612	-1	0	0	0	0	1	undefined	58e62ffd09e55e10009c79d9
	false	undefined	0							undefined	0	58e6313109e55e10009c7c18		true	308365	613	-1	0	0	0	0	1	undefined	58e62ffd09e55e10009c79d9
	false	undefined	0							undefined	0	58e6313209e55e10009c7c19		true	308829	614	-1	0	0	0	0	1	undefined	58e62ffd09e55e10009c79d9
	false	undefined	0							undefined	0	58e6313209e55e10009c7c1a		true	309379	615	-1	0	0	0	0	1	undefined	58e62ffd09e55e10009c79d9
	false	undefined	0							undefined	0	58e6313309e55e10009c7c1b		true	309976	616	-1	0	0	0	0	1	undefined	58e62ffd09e55e10009c79d9
	false	undefined	0							undefined	0	58e6313309e55e10009c7c1c		true	310517	617	-1	0	0	0	0	1	undefined	58e62ffd09e55e10009c79d9
	false	undefined	0							undefined	0	58e6313409e55e10009c7c1d		true	310920	618	-1	0	0	0	0	1	undefined	58e62ffd09e55e10009c79d9
	false	undefined	0							undefined	0	58e6313409e55e10009c7c1e		true	311516	619	0	0	0	0	0	1	undefined	58e62ffd09e55e10009c79d9
	false	undefined	0							undefined	0	58e6313509e55e10009c7c1f		true	311983	620	-1	0	0	0	0	1	undefined	58e62ffd09e55e10009c79d9
	false	undefined	0							undefined	0	58e6313509e55e10009c7c20		true	312512	621	-1	0	0	0	0	1	undefined	58e62ffd09e55e10009c79d9
	false	undefined	0							undefined	0	58e6313609e55e10009c7c21		true	313036	622	-1	0	0	0	0	1	undefined	58e62ffd09e55e10009c79d9
	false	undefined	0							undefined	0	58e6313609e55e10009c7c22		true	313576	623	-1	0	0	0	0	1	undefined	58e62ffd09e55e10009c79d9
	false	undefined	0							undefined	0	58e6313709e55e10009c7c23		true	314119	624	-1	0	0	0	0	1	undefined	58e62ffd09e55e10009c79d9
	false	undefined	0							undefined	0	58e6313709e55e10009c7c24		true	314562	625	-1	0	0	0	0	1	undefined	58e62ffd09e55e10009c79d9
	false	undefined	0							undefined	0	58e6313809e55e10009c7c25		true	315177	626	-1	0	0	0	0	1	undefined	58e62ffd09e55e10009c79d9
	false	undefined	0							undefined	0	58e6313809e55e10009c7c26		true	315652	627	-1	0	0	0	0	1	undefined	58e62ffd09e55e10009c79d9
	false	undefined	0							undefined	0	58e6313909e55e10009c7c27		true	316189	628	-1	0	0	0	0	1	undefined	58e62ffd09e55e10009c79d9
	false	undefined	0							undefined	0	58e6313a09e55e10009c7c28		true	316826	629	-1	0	0	0	0	1	undefined	58e62ffd09e55e10009c79d9
	false	undefined	0							undefined	0	58e6313a09e55e10009c7c29		true	317393	630	-1	0	0	0	0	1	undefined	58e62ffd09e55e10009c79d9
	false	undefined	0							undefined	0	58e6313b09e55e10009c7c2a		true	317903	631	-1	0	0	0	0	1	undefined	58e62ffd09e55e10009c79d9
	false	undefined	0							undefined	0	58e6313b09e55e10009c7c2b		true	318456	632	108	0	0	0	0	1	undefined	58e62ffd09e55e10009c79d9
	false	undefined	0							undefined	0	58e6313c09e55e10009c7c2c		false	318985	633	107	0	0	0	0	1	undefined	58e62ffd09e55e10009c79d9
	false	undefined	0							undefined	0	58e6313c09e55e10009c7c2d		false	319538	634	100	0	0	0	0	1	undefined	58e62ffd09e55e10009c79d9
	false	undefined	0							undefined	0	58e6313d09e55e10009c7c2e		false	320071	638	112	0	0	0	0	1	undefined	58e62ffd09e55e10009c79d9
	false	undefined	0							undefined	0	58e6313d09e55e10009c7c2f		false	320596	639	113	0	0	0	0	1	undefined	58e62ffd09e55e10009c79d9
	false	undefined	0							undefined	0	58e6313e09e55e10009c7c30		false	321070	640	115	0	0	0	0	1	undefined	58e62ffd09e55e10009c79d9
	false	undefined	0							undefined	0	58e6313f09e55e10009c7c31		false	321581	641	114	0	0	0	0	1	undefined	58e62ffd09e55e10009c79d9
	false	undefined	0							undefined	0	58e6313f09e55e10009c7c32		false	322192	642	114	0	0	0	0	1	undefined	58e62ffd09e55e10009c79d9
	false	undefined	0							undefined	0	58e6313f09e55e10009c7c33		false	322728	643	115	0	0	0	0	1	undefined	58e62ffd09e55e10009c79d9
	false	undefined	0							undefined	0	58e6314009e55e10009c7c34		false	323207	644	114	0	0	0	0	1	undefined	58e62ffd09e55e10009c79d9
	false	undefined	0							undefined	0	58e6314109e55e10009c7c35		false	323735	645	115	0	0	0	0	1	undefined	58e62ffd09e55e10009c79d9
	false	undefined	0							undefined	0	58e6314109e55e10009c7c36		false	324263	646	113	0	0	0	0	1	undefined	58e62ffd09e55e10009c79d9
	false	undefined	0							undefined	0	58e6314209e55e10009c7c37		false	324809	647	115	0	0	0	0	1	undefined	58e62ffd09e55e10009c79d9
	false	undefined	0							undefined	0	58e6314209e55e10009c7c38		false	325412	648	115	0	0	0	0	1	undefined	58e62ffd09e55e10009c79d9
	false	undefined	0							undefined	0	58e6314309e55e10009c7c39		false	325940	649	113	0	0	0	0	1	undefined	58e62ffd09e55e10009c79d9
	false	undefined	0							undefined	0	58e6314309e55e10009c7c3a		false	326472	650	113	0	0	0	0	1	undefined	58e62ffd09e55e10009c79d9
	false	undefined	0							undefined	0	58e6314409e55e10009c7c3b		false	327003	651	115	0	0	0	0	1	undefined	58e62ffd09e55e10009c79d9
	false	undefined	0							undefined	0	58e6314409e55e10009c7c3c		false	327551	652	117	0	0	0	0	1	undefined	58e62ffd09e55e10009c79d9
	false	undefined	0							undefined	0	58e6314509e55e10009c7c3d		true	328054	653	106	0	0	0	0	1	undefined	58e62ffd09e55e10009c79d9
	false	undefined	0							undefined	0	58e6314509e55e10009c7c3e		true	328615	654	91	0	0	0	0	1	undefined	58e62ffd09e55e10009c79d9
	false	undefined	0							undefined	0	58e6314609e55e10009c7c3f		true	329107	655	-1	0	0	0	0	1	undefined	58e62ffd09e55e10009c79d9
	false	undefined	0							undefined	0	58e6314609e55e10009c7c40		false	329677	656	115	0	0	0	0	1	undefined	58e62ffd09e55e10009c79d9
	false	undefined	0							undefined	0	58e6314709e55e10009c7c41		false	330142	657	114	0	0	0	0	1	undefined	58e62ffd09e55e10009c79d9
	false	undefined	0							undefined	0	58e6314709e55e10009c7c42		false	330672	658	115	0	0	0	0	1	undefined	58e62ffd09e55e10009c79d9
	false	undefined	0							undefined	0	58e6314809e55e10009c7c43		false	331220	659	116	0	0	0	0	1	undefined	58e62ffd09e55e10009c79d9
	false	undefined	0							undefined	0	58e6314909e55e10009c7c44		false	331756	660	115	0	0	0	0	1	undefined	58e62ffd09e55e10009c79d9
	false	undefined	0							undefined	0	58e6314909e55e10009c7c45		false	332287	661	116	0	0	0	0	1	undefined	58e62ffd09e55e10009c79d9
	false	undefined	0							undefined	0	58e6314a09e55e10009c7c46		false	332812	662	115	0	0	0	0	1	undefined	58e62ffd09e55e10009c79d9
	false	undefined	0							undefined	0	58e6314a09e55e10009c7c47		false	333344	663	114	0	0	0	0	1	undefined	58e62ffd09e55e10009c79d9
	false	undefined	0							undefined	0	58e6314b09e55e10009c7c48		false	333896	664	114	0	0	0	0	1	undefined	58e62ffd09e55e10009c79d9
	false	undefined	0							undefined	0	58e6314b09e55e10009c7c49		false	334423	665	114	0	0	0	0	1	undefined	58e62ffd09e55e10009c79d9
	false	undefined	0							undefined	0	58e6314c09e55e10009c7c4a		false	334948	666	116	0	0	0	0	1	undefined	58e62ffd09e55e10009c79d9
	false	undefined	0							undefined	0	58e6314c09e55e10009c7c4b		false	335483	667	112	0	0	0	0	1	undefined	58e62ffd09e55e10009c79d9
	false	undefined	0							undefined	0	58e6314d09e55e10009c7c4c		false	336029	668	104	0	0	0	0	1	undefined	58e62ffd09e55e10009c79d9
	false	undefined	0							undefined	0	58e6314d09e55e10009c7c4d		false	336565	669	106	0	0	0	0	1	undefined	58e62ffd09e55e10009c79d9
	false	undefined	0							undefined	0	58e6314e09e55e10009c7c4e		false	337078	670	112	0	0	0	0	1	undefined	58e62ffd09e55e10009c79d9
	false	undefined	0							undefined	0	58e6314e09e55e10009c7c4f		false	337628	671	117	0	0	0	0	1	undefined	58e62ffd09e55e10009c79d9
	false	undefined	0							undefined	0	58e6314f09e55e10009c7c50		false	338100	672	113	0	0	0	0	1	undefined	58e62ffd09e55e10009c79d9
	false	undefined	0							undefined	0	58e6314f09e55e10009c7c51		false	338700	673	113	0	0	0	0	1	undefined	58e62ffd09e55e10009c79d9
	false	undefined	0							undefined	0	58e6315009e55e10009c7c52		false	339237	674	117	0	0	0	0	1	undefined	58e62ffd09e55e10009c79d9
	false	undefined	0							undefined	0	58e6315109e55e10009c7c53		false	339765	675	118	0	0	0	0	1	undefined	58e62ffd09e55e10009c79d9
	false	undefined	0							undefined	0	58e6315109e55e10009c7c54		false	340292	676	117	0	0	0	0	1	undefined	58e62ffd09e55e10009c79d9
	false	undefined	0							undefined	0	58e6315209e55e10009c7c55		false	340835	677	113	0	0	0	0	1	undefined	58e62ffd09e55e10009c79d9
	false	undefined	0							undefined	0	58e6315209e55e10009c7c56		false	341376	678	114	0	0	0	0	1	undefined	58e62ffd09e55e10009c79d9
	false	undefined	0							undefined	0	58e6315309e55e10009c7c57		false	341894	679	112	0	0	0	0	1	undefined	58e62ffd09e55e10009c79d9
	false	undefined	0							undefined	0	58e6315309e55e10009c7c58		false	342517	680	114	0	0	0	0	1	undefined	58e62ffd09e55e10009c79d9
	false	undefined	0							undefined	0	58e6315409e55e10009c7c59		false	342988	681	117	0	0	0	0	1	undefined	58e62ffd09e55e10009c79d9
	false	undefined	0							undefined	0	58e6315409e55e10009c7c5a		true	343491	682	115	0	0	0	0	1	undefined	58e62ffd09e55e10009c79d9
	false	undefined	0							undefined	0	58e6315509e55e10009c7c5b		true	344098	683	109	0	0	0	0	1	undefined	58e62ffd09e55e10009c79d9
	false	undefined	0							undefined	0	58e6315509e55e10009c7c5c		true	344586	684	108	0	0	0	0	1	undefined	58e62ffd09e55e10009c79d9
	false	undefined	0							undefined	0	58e6315609e55e10009c7c5d		false	345115	685	118	0	0	0	0	1	undefined	58e62ffd09e55e10009c79d9
	false	undefined	0							undefined	0	58e6315609e55e10009c7c5e		false	345642	686	118	0	0	0	0	1	undefined	58e62ffd09e55e10009c79d9
	false	undefined	0							undefined	0	58e6315709e55e10009c7c5f		false	346262	687	116	0	0	0	0	1	undefined	58e62ffd09e55e10009c79d9
	false	undefined	0							undefined	0	58e6315809e55e10009c7c60		false	346773	688	113	0	0	0	0	1	undefined	58e62ffd09e55e10009c79d9
	false	undefined	0							undefined	0	58e6315809e55e10009c7c61		false	347322	689	111	0	0	0	0	1	undefined	58e62ffd09e55e10009c79d9
	false	undefined	0							undefined	0	58e6315909e55e10009c7c62		false	347850	690	116	0	0	0	0	1	undefined	58e62ffd09e55e10009c79d9
	false	undefined	0							undefined	0	58e6315909e55e10009c7c63		false	348380	691	115	0	0	0	0	1	undefined	58e62ffd09e55e10009c79d9
	false	undefined	0							undefined	0	58e6315a09e55e10009c7c64		false	348990	692	116	0	0	0	0	1	undefined	58e62ffd09e55e10009c79d9
	false	undefined	0							undefined	0	58e6315a09e55e10009c7c65		false	349517	693	115	0	0	0	0	1	undefined	58e62ffd09e55e10009c79d9
	false	undefined	0							undefined	0	58e6315b09e55e10009c7c66		false	350048	694	114	0	0	0	0	1	undefined	58e62ffd09e55e10009c79d9
	false	undefined	0							undefined	0	58e6315b09e55e10009c7c67		false	350654	695	117	0	0	0	0	1	undefined	58e62ffd09e55e10009c79d9
	false	undefined	0							undefined	0	58e6315c09e55e10009c7c68		false	351114	696	116	0	0	0	0	1	undefined	58e62ffd09e55e10009c79d9
	false	undefined	0							undefined	0	58e6315c09e55e10009c7c69		false	351653	697	116	0	0	0	0	1	undefined	58e62ffd09e55e10009c79d9
	false	undefined	0							undefined	0	58e6315d09e55e10009c7c6a		false	352176	698	113	0	0	0	0	1	undefined	58e62ffd09e55e10009c79d9
	false	undefined	0							undefined	0	58e6315e09e55e10009c7c6b		false	352723	699	114	0	0	0	0	1	undefined	58e62ffd09e55e10009c79d9
	false	undefined	0							undefined	0	58e6315e09e55e10009c7c6c		false	353263	700	118	0	0	0	0	1	undefined	58e62ffd09e55e10009c79d9
	false	undefined	0							undefined	0	58e6315f09e55e10009c7c6d		false	353793	701	119	0	0	0	0	1	undefined	58e62ffd09e55e10009c79d9
	false	undefined	0							undefined	0	58e6315f09e55e10009c7c6e		false	354316	702	119	0	0	0	0	1	undefined	58e62ffd09e55e10009c79d9
	false	undefined	0							undefined	0	58e6316009e55e10009c7c6f		false	354856	703	116	0	0	0	0	1	undefined	58e62ffd09e55e10009c79d9
	false	undefined	0							undefined	0	58e6316009e55e10009c7c70		false	355404	704	113	0	0	0	0	1	undefined	58e62ffd09e55e10009c79d9
	false	undefined	0							undefined	0	58e6316109e55e10009c7c71		false	355939	705	113	0	0	0	0	1	undefined	58e62ffd09e55e10009c79d9
	false	undefined	0							undefined	0	58e6316109e55e10009c7c72		false	356457	706	112	0	0	0	0	1	undefined	58e62ffd09e55e10009c79d9
	false	undefined	0							undefined	0	58e6316209e55e10009c7c73		false	356927	707	110	0	0	0	0	1	undefined	58e62ffd09e55e10009c79d9
	false	undefined	0							undefined	0	58e6316209e55e10009c7c74		false	357539	708	113	0	0	0	0	1	undefined	58e62ffd09e55e10009c79d9
	false	undefined	0							undefined	0	58e6316309e55e10009c7c75		false	358074	709	112	0	0	0	0	1	undefined	58e62ffd09e55e10009c79d9
	false	undefined	0							undefined	0	58e6316309e55e10009c7c76		false	358602	710	114	0	0	0	0	1	undefined	58e62ffd09e55e10009c79d9
	false	undefined	0							undefined	0	58e6316409e55e10009c7c77		false	359146	711	115	0	0	0	0	1	undefined	58e62ffd09e55e10009c79d9
	false	undefined	0							undefined	0	58e6316409e55e10009c7c78		false	359672	712	116	0	0	0	0	1	undefined	58e62ffd09e55e10009c79d9
	false	undefined	0							undefined	0	58e6316509e55e10009c7c79		false	360207	713	116	0	0	0	0	1	undefined	58e62ffd09e55e10009c79d9
	false	undefined	0							undefined	0	58e6316609e55e10009c7c7a		false	360736	714	113	0	0	0	0	1	undefined	58e62ffd09e55e10009c79d9
	false	undefined	0							undefined	0	58e6316609e55e10009c7c7b		false	361267	715	113	0	0	0	0	1	undefined	58e62ffd09e55e10009c79d9
	false	undefined	0							undefined	0	58e6316709e55e10009c7c7c		false	361797	716	113	0	0	0	0	1	undefined	58e62ffd09e55e10009c79d9
	false	undefined	0							undefined	0	58e6316709e55e10009c7c7d		false	362334	717	112	0	0	0	0	1	undefined	58e62ffd09e55e10009c79d9
	false	undefined	0							undefined	0	58e6316809e55e10009c7c7e		false	362875	718	111	0	0	0	0	1	undefined	58e62ffd09e55e10009c79d9
	false	undefined	0							undefined	0	58e6316809e55e10009c7c7f		false	363415	719	114	0	0	0	0	1	undefined	58e62ffd09e55e10009c79d9
	false	undefined	0							undefined	0	58e6316909e55e10009c7c80		false	363944	720	118	0	0	0	0	1	undefined	58e62ffd09e55e10009c79d9
	false	undefined	0							undefined	0	58e6316909e55e10009c7c81		false	364419	721	118	0	0	0	0	1	undefined	58e62ffd09e55e10009c79d9
	false	undefined	0							undefined	0	58e6316a09e55e10009c7c82		false	364995	722	116	0	0	0	0	1	undefined	58e62ffd09e55e10009c79d9
	false	undefined	0							undefined	0	58e6316a09e55e10009c7c83		false	365498	723	115	0	0	0	0	1	undefined	58e62ffd09e55e10009c79d9
	false	undefined	0							undefined	0	58e6316b09e55e10009c7c84		false	366004	724	111	0	0	0	0	1	undefined	58e62ffd09e55e10009c79d9
	false	undefined	0							undefined	0	58e6316b09e55e10009c7c85		false	366626	725	108	0	0	0	0	1	undefined	58e62ffd09e55e10009c79d9
	false	undefined	0							undefined	0	58e6316c09e55e10009c7c86		false	367155	726	107	0	0	0	0	1	undefined	58e62ffd09e55e10009c79d9
	false	undefined	0							undefined	0	58e6316c09e55e10009c7c87		false	367685	727	111	0	0	0	0	1	undefined	58e62ffd09e55e10009c79d9
	false	undefined	0							undefined	0	58e6316d09e55e10009c7c88		false	368221	728	111	0	0	0	0	1	undefined	58e62ffd09e55e10009c79d9
	false	undefined	0							undefined	0	58e6316e09e55e10009c7c89		false	368748	729	113	0	0	0	0	1	undefined	58e62ffd09e55e10009c79d9
	false	undefined	0							undefined	0	58e6316e09e55e10009c7c8a		false	369301	730	116	0	0	0	0	1	undefined	58e62ffd09e55e10009c79d9
	false	undefined	0							undefined	0	58e6316f09e55e10009c7c8b		false	369767	731	113	0	0	0	0	1	undefined	58e62ffd09e55e10009c79d9
	false	undefined	0							undefined	0	58e6316f09e55e10009c7c8c		false	370365	732	113	0	0	0	0	1	undefined	58e62ffd09e55e10009c79d9
	false	undefined	0							undefined	0	58e6317009e55e10009c7c8d		false	370894	733	114	0	0	0	0	1	undefined	58e62ffd09e55e10009c79d9
	false	undefined	0							undefined	0	58e6317009e55e10009c7c8e		false	371355	734	111	0	0	0	0	1	undefined	58e62ffd09e55e10009c79d9
	false	undefined	0							undefined	0	58e6317109e55e10009c7c8f		false	371963	735	114	0	0	0	0	1	undefined	58e62ffd09e55e10009c79d9
	false	undefined	0							undefined	0	58e6317109e55e10009c7c90		false	372502	736	115	0	0	0	0	1	undefined	58e62ffd09e55e10009c79d9
	false	undefined	0							undefined	0	58e6317209e55e10009c7c91		false	373032	737	117	0	0	0	0	1	undefined	58e62ffd09e55e10009c79d9
	false	undefined	0							undefined	0	58e6317209e55e10009c7c92		false	373547	738	116	0	0	0	0	1	undefined	58e62ffd09e55e10009c79d9
	false	undefined	0							undefined	0	58e6317309e55e10009c7c93		false	374094	739	115	0	0	0	0	1	undefined	58e62ffd09e55e10009c79d9
	false	undefined	0							undefined	0	58e6317309e55e10009c7c94		false	374572	740	115	0	0	0	0	1	undefined	58e62ffd09e55e10009c79d9
	false	undefined	0							undefined	0	58e6317409e55e10009c7c95		false	375172	741	117	0	0	0	0	1	undefined	58e62ffd09e55e10009c79d9
	false	undefined	0							undefined	0	58e6317409e55e10009c7c96		true	375706	742	111	0	0	0	0	1	undefined	58e62ffd09e55e10009c79d9
	false	undefined	0							undefined	0	58e6317509e55e10009c7c97		false	376232	743	108	0	0	0	0	1	undefined	58e62ffd09e55e10009c79d9
	false	undefined	0							undefined	0	58e6317609e55e10009c7c98		false	376764	744	110	0	0	0	0	1	undefined	58e62ffd09e55e10009c79d9
	false	undefined	0							undefined	0	58e6317609e55e10009c7c99		false	377304	745	110	0	0	0	0	1	undefined	58e62ffd09e55e10009c79d9
	false	undefined	0							undefined	0	58e6317709e55e10009c7c9a		false	377843	746	111	0	0	0	0	1	undefined	58e62ffd09e55e10009c79d9
	false	undefined	0							undefined	0	58e6317709e55e10009c7c9b		true	378505	747	113	0	0	0	0	1	undefined	58e62ffd09e55e10009c79d9
	false	undefined	0							undefined	0	58e6317809e55e10009c7c9c		true	378974	748	116	0	0	0	0	1	undefined	58e62ffd09e55e10009c79d9
	false	undefined	0							undefined	0	58e6317809e55e10009c7c9d		false	379511	749	118	0	0	0	0	1	undefined	58e62ffd09e55e10009c79d9
	false	undefined	0							undefined	0	58e6317909e55e10009c7c9e		false	380052	750	120	0	0	0	0	1	undefined	58e62ffd09e55e10009c79d9
	false	undefined	0							undefined	0	58e6317909e55e10009c7c9f		false	380658	751	119	0	0	0	0	1	undefined	58e62ffd09e55e10009c79d9
	false	undefined	0							undefined	0	58e6317a09e55e10009c7ca0		false	381252	752	116	0	0	0	0	1	undefined	58e62ffd09e55e10009c79d9
	false	undefined	0							undefined	0	58e6317b09e55e10009c7ca1		false	381850	753	113	0	0	0	0	1	undefined	58e62ffd09e55e10009c79d9
	false	undefined	0							undefined	0	58e6317b09e55e10009c7ca2		false	382385	754	110	0	0	0	0	1	undefined	58e62ffd09e55e10009c79d9
	false	undefined	0							undefined	0	58e6317c09e55e10009c7ca3		false	382911	755	105	0	0	0	0	1	undefined	58e62ffd09e55e10009c79d9
	false	undefined	0							undefined	0	58e6317c09e55e10009c7ca4		true	383446	756	104	0	0	0	0	1	undefined	58e62ffd09e55e10009c79d9
	false	undefined	0							undefined	0	58e6317d09e55e10009c7ca5		true	383991	757	112	0	0	0	0	1	undefined	58e62ffd09e55e10009c79d9
	false	undefined	0							undefined	0	58e6317d09e55e10009c7ca6		false	384515	758	115	0	0	0	0	1	undefined	58e62ffd09e55e10009c79d9
	false	undefined	0							undefined	0	58e6317e09e55e10009c7ca7		false	384972	759	110	0	0	0	0	1	undefined	58e62ffd09e55e10009c79d9
	false	undefined	0							undefined	0	58e6317e09e55e10009c7ca8		false	385538	760	115	0	0	0	0	1	undefined	58e62ffd09e55e10009c79d9
	false	undefined	0							undefined	0	58e6317f09e55e10009c7ca9		false	386048	761	116	0	0	0	0	1	undefined	58e62ffd09e55e10009c79d9
	false	undefined	0							undefined	0	58e6317f09e55e10009c7caa		false	386573	762	113	0	0	0	0	1	undefined	58e62ffd09e55e10009c79d9
	false	undefined	0							undefined	0	58e6318009e55e10009c7cab		false	387130	763	111	0	0	0	0	1	undefined	58e62ffd09e55e10009c79d9
	false	undefined	0							undefined	0	58e6318009e55e10009c7cac		false	387660	764	110	0	0	0	0	1	undefined	58e62ffd09e55e10009c79d9
	false	undefined	0							undefined	0	58e6318109e55e10009c7cad		false	388185	765	112	0	0	0	0	1	undefined	58e62ffd09e55e10009c79d9
	false	undefined	0							undefined	0	58e6318109e55e10009c7cae		false	388652	766	112	0	0	0	0	1	undefined	58e62ffd09e55e10009c79d9
	false	undefined	0							undefined	0	58e6318209e55e10009c7caf		false	389201	767	116	0	0	0	0	1	undefined	58e62ffd09e55e10009c79d9
	false	undefined	0							undefined	0	58e6318309e55e10009c7cb0		false	389808	768	115	0	0	0	0	1	undefined	58e62ffd09e55e10009c79d9
	false	undefined	0							undefined	0	58e6318309e55e10009c7cb1		false	390331	769	111	0	0	0	0	1	undefined	58e62ffd09e55e10009c79d9
	false	undefined	0							undefined	0	58e6318409e55e10009c7cb2		false	390863	770	112	0	0	0	0	1	undefined	58e62ffd09e55e10009c79d9
	false	undefined	0							undefined	0	58e6318409e55e10009c7cb3		false	391354	771	113	0	0	0	0	1	undefined	58e62ffd09e55e10009c79d9
	false	undefined	0							undefined	0	58e6318509e55e10009c7cb4		false	391943	772	112	0	0	0	0	1	undefined	58e62ffd09e55e10009c79d9
	false	undefined	0							undefined	0	58e6318509e55e10009c7cb5		false	392540	773	111	0	0	0	0	1	undefined	58e62ffd09e55e10009c79d9
	false	undefined	0							undefined	0	58e6318609e55e10009c7cb6		false	393061	774	112	0	0	0	0	1	undefined	58e62ffd09e55e10009c79d9
	false	undefined	0							undefined	0	58e6318609e55e10009c7cb7		false	393602	775	113	0	0	0	0	1	undefined	58e62ffd09e55e10009c79d9
	false	undefined	0							undefined	0	58e6318709e55e10009c7cb8		false	394126	776	112	0	0	0	0	1	undefined	58e62ffd09e55e10009c79d9
	false	undefined	0							undefined	0	58e6318709e55e10009c7cb9		false	394680	777	111	0	0	0	0	1	undefined	58e62ffd09e55e10009c79d9
	false	undefined	0							undefined	0	58e6318809e55e10009c7cba		false	395212	778	116	0	0	0	0	1	undefined	58e62ffd09e55e10009c79d9
	false	undefined	0							undefined	0	58e6318909e55e10009c7cbb		false	395742	779	115	0	0	0	0	1	undefined	58e62ffd09e55e10009c79d9
	false	undefined	0							undefined	0	58e6318909e55e10009c7cbc		false	396341	780	115	0	0	0	0	1	undefined	58e62ffd09e55e10009c79d9
	false	undefined	0							undefined	0	58e6318a09e55e10009c7cbd		false	396882	781	111	0	0	0	0	1	undefined	58e62ffd09e55e10009c79d9
	false	undefined	0							undefined	0	58e6318a09e55e10009c7cbe		false	397422	782	111	0	0	0	0	1	undefined	58e62ffd09e55e10009c79d9
	false	undefined	0							undefined	0	58e6318b09e55e10009c7cbf		false	397949	783	111	0	0	0	0	1	undefined	58e62ffd09e55e10009c79d9
	false	undefined	0							undefined	0	58e6318b09e55e10009c7cc0		false	398483	784	110	0	0	0	0	1	undefined	58e62ffd09e55e10009c79d9
	false	undefined	0							undefined	0	58e6318c09e55e10009c7cc1		false	399077	785	113	0	0	0	0	1	undefined	58e62ffd09e55e10009c79d9
	false	undefined	0							undefined	0	58e6318c09e55e10009c7cc2		false	399508	786	112	0	0	0	0	1	undefined	58e62ffd09e55e10009c79d9
	false	undefined	0							undefined	0	58e6318d09e55e10009c7cc3		false	400063	787	114	0	0	0	0	1	undefined	58e62ffd09e55e10009c79d9
	false	undefined	0							undefined	0	58e6318d09e55e10009c7cc4		false	400585	788	112	0	0	0	0	1	undefined	58e62ffd09e55e10009c79d9
	false	undefined	0							undefined	0	58e6318e09e55e10009c7cc5		false	401091	789	111	0	0	0	0	1	undefined	58e62ffd09e55e10009c79d9
	false	undefined	0							undefined	0	58e6318e09e55e10009c7cc6		false	401622	790	115	0	0	0	0	1	undefined	58e62ffd09e55e10009c79d9
	false	undefined	0							undefined	0	58e6318f09e55e10009c7cc7		false	402108	791	114	0	0	0	0	1	undefined	58e62ffd09e55e10009c79d9
	false	undefined	0							undefined	0	58e6318f09e55e10009c7cc8		false	402685	792	114	0	0	0	0	1	undefined	58e62ffd09e55e10009c79d9
	false	undefined	0							undefined	0	58e6319009e55e10009c7cc9		false	403229	793	114	0	0	0	0	1	undefined	58e62ffd09e55e10009c79d9
	false	undefined	0							undefined	0	58e6319109e55e10009c7cca		false	403832	794	115	0	0	0	0	1	undefined	58e62ffd09e55e10009c79d9
	false	undefined	0							undefined	0	58e6319109e55e10009c7ccb		false	404356	795	116	0	0	0	0	1	undefined	58e62ffd09e55e10009c79d9
	false	undefined	0							undefined	0	58e6319209e55e10009c7ccc		false	404896	796	113	0	0	0	0	1	undefined	58e62ffd09e55e10009c79d9
	false	undefined	0							undefined	0	58e6319209e55e10009c7ccd		false	405555	797	112	0	0	0	0	1	undefined	58e62ffd09e55e10009c79d9
	false	undefined	0							undefined	0	58e6319309e55e10009c7cce		false	406085	798	113	0	0	0	0	1	undefined	58e62ffd09e55e10009c79d9
	false	undefined	0							undefined	0	58e6319309e55e10009c7ccf		false	406570	799	112	0	0	0	0	1	undefined	58e62ffd09e55e10009c79d9
	false	undefined	0							undefined	0	58e6319409e55e10009c7cd0		false	407101	800	111	0	0	0	0	1	undefined	58e62ffd09e55e10009c79d9
	false	undefined	0							undefined	0	58e6319409e55e10009c7cd1		false	407632	801	113	0	0	0	0	1	undefined	58e62ffd09e55e10009c79d9
	false	undefined	0							undefined	0	58e6319509e55e10009c7cd2		false	408102	802	115	0	0	0	0	1	undefined	58e62ffd09e55e10009c79d9
	false	undefined	0							undefined	0	58e6319509e55e10009c7cd3		false	408621	803	117	0	0	0	0	1	undefined	58e62ffd09e55e10009c79d9
	false	undefined	0							undefined	0	58e6319609e55e10009c7cd4		false	409169	804	115	0	0	0	0	1	undefined	58e62ffd09e55e10009c79d9
	false	undefined	0							undefined	0	58e6319609e55e10009c7cd5		false	409696	805	115	0	0	0	0	1	undefined	58e62ffd09e55e10009c79d9
	false	undefined	0							undefined	0	58e6319709e55e10009c7cd6		false	410237	806	117	0	0	0	0	1	undefined	58e62ffd09e55e10009c79d9
	false	undefined	0							undefined	0	58e6319709e55e10009c7cd7		false	410732	807	116	0	0	0	0	1	undefined	58e62ffd09e55e10009c79d9
	false	undefined	0							undefined	0	58e6319809e55e10009c7cd8		false	411291	808	116	0	0	0	0	1	undefined	58e62ffd09e55e10009c79d9
	false	undefined	0							undefined	0	58e6319909e55e10009c7cd9		false	411850	809	113	0	0	0	0	1	undefined	58e62ffd09e55e10009c79d9
	false	undefined	0							undefined	0	58e6319909e55e10009c7cda		false	412377	810	109	0	0	0	0	1	undefined	58e62ffd09e55e10009c79d9
	false	undefined	0							undefined	0	58e6319a09e55e10009c7cdb		false	412891	811	106	0	0	0	0	1	undefined	58e62ffd09e55e10009c79d9
	false	undefined	0							undefined	0	58e6319a09e55e10009c7cdc		false	413514	812	104	0	0	0	0	1	undefined	58e62ffd09e55e10009c79d9
	false	undefined	0							undefined	0	58e6319b09e55e10009c7cdd		false	414046	813	105	0	0	0	0	1	undefined	58e62ffd09e55e10009c79d9
	false	undefined	0							undefined	0	58e6319b09e55e10009c7cde		false	414565	814	113	0	0	0	0	1	undefined	58e62ffd09e55e10009c79d9
	false	undefined	0							undefined	0	58e6319c09e55e10009c7cdf		false	415113	815	113	0	0	0	0	1	undefined	58e62ffd09e55e10009c79d9
	false	undefined	0							undefined	0	58e6319c09e55e10009c7ce0		false	415641	816	113	0	0	0	0	1	undefined	58e62ffd09e55e10009c79d9
	false	undefined	0							undefined	0	58e6319d09e55e10009c7ce1		false	416130	817	109	0	0	0	0	1	undefined	58e62ffd09e55e10009c79d9
	false	undefined	0							undefined	0	58e6319d09e55e10009c7ce2		false	416666	818	108	0	0	0	0	1	undefined	58e62ffd09e55e10009c79d9
	false	undefined	0							undefined	0	58e6319e09e55e10009c7ce3		false	417252	819	111	0	0	0	0	1	undefined	58e62ffd09e55e10009c79d9
	false	undefined	0							undefined	0	58e6319f09e55e10009c7ce4		false	417794	820	112	0	0	0	0	1	undefined	58e62ffd09e55e10009c79d9
	false	undefined	0							undefined	0	58e6319f09e55e10009c7ce5		false	418324	821	111	0	0	0	0	1	undefined	58e62ffd09e55e10009c79d9
	false	undefined	0							undefined	0	58e631a009e55e10009c7ce6		false	418790	822	102	0	0	0	0	1	undefined	58e62ffd09e55e10009c79d9
	false	undefined	0							undefined	0	58e631a009e55e10009c7ce7		true	419323	823	84	0	0	0	0	1	undefined	58e62ffd09e55e10009c79d9
	false	undefined	0							undefined	0	58e631a109e55e10009c7ce8		true	419855	824	82	0	0	0	0	1	undefined	58e62ffd09e55e10009c79d9
	false	undefined	0							undefined	0	58e631a109e55e10009c7ce9		true	420392	825	101	0	0	0	0	1	undefined	58e62ffd09e55e10009c79d9
	false	undefined	0							undefined	0	58e631a209e55e10009c7cea		false	420997	826	108	0	0	0	0	1	undefined	58e62ffd09e55e10009c79d9
	false	undefined	0							undefined	0	58e631a209e55e10009c7ceb		false	421530	827	106	0	0	0	0	1	undefined	58e62ffd09e55e10009c79d9
	false	undefined	0							undefined	0	58e631a309e55e10009c7cec		false	422062	828	109	0	0	0	0	1	undefined	58e62ffd09e55e10009c79d9
	false	undefined	0							undefined	0	58e631a309e55e10009c7ced		false	422580	829	113	0	0	0	0	1	undefined	58e62ffd09e55e10009c79d9
	false	undefined	0							undefined	0	58e631a409e55e10009c7cee		false	423123	830	116	0	0	0	0	1	undefined	58e62ffd09e55e10009c79d9
	false	undefined	0							undefined	0	58e631a409e55e10009c7cef		false	423673	831	116	0	0	0	0	1	undefined	58e62ffd09e55e10009c79d9
	false	undefined	0							undefined	0	58e631a509e55e10009c7cf0		false	424199	832	114	0	0	0	0	1	undefined	58e62ffd09e55e10009c79d9
	false	undefined	0							undefined	0	58e631a609e55e10009c7cf1		false	424790	833	112	0	0	0	0	1	undefined	58e62ffd09e55e10009c79d9
	false	undefined	0							undefined	0	58e631a609e55e10009c7cf2		false	425340	834	113	0	0	0	0	1	undefined	58e62ffd09e55e10009c79d9
	false	undefined	0							undefined	0	58e631a709e55e10009c7cf3		false	425868	835	112	0	0	0	0	1	undefined	58e62ffd09e55e10009c79d9
	false	undefined	0							undefined	0	58e631a709e55e10009c7cf4		false	426346	836	112	0	0	0	0	1	undefined	58e62ffd09e55e10009c79d9
	false	undefined	0							undefined	0	58e631a809e55e10009c7cf5		false	426950	837	114	0	0	0	0	1	undefined	58e62ffd09e55e10009c79d9
	false	undefined	0							undefined	0	58e631a809e55e10009c7cf6		false	427473	838	114	0	0	0	0	1	undefined	58e62ffd09e55e10009c79d9
	false	undefined	0							undefined	0	58e631a909e55e10009c7cf7		false	428001	839	114	0	0	0	0	1	undefined	58e62ffd09e55e10009c79d9
	false	undefined	0							undefined	0	58e631a909e55e10009c7cf8		false	428533	840	113	0	0	0	0	1	undefined	58e62ffd09e55e10009c79d9
	false	undefined	0							undefined	0	58e631aa09e55e10009c7cf9		false	429087	841	113	0	0	0	0	1	undefined	58e62ffd09e55e10009c79d9
	false	undefined	0							undefined	0	58e631aa09e55e10009c7cfa		false	429616	842	115	0	0	0	0	1	undefined	58e62ffd09e55e10009c79d9
	false	undefined	0							undefined	0	58e631ab09e55e10009c7cfb		false	430146	843	115	0	0	0	0	1	undefined	58e62ffd09e55e10009c79d9
	false	undefined	0							undefined	0	58e631ab09e55e10009c7cfc		false	430675	844	115	0	0	0	0	1	undefined	58e62ffd09e55e10009c79d9
	false	undefined	0							undefined	0	58e631ac09e55e10009c7cfd		false	431219	845	109	0	0	0	0	1	undefined	58e62ffd09e55e10009c79d9
	false	undefined	0							undefined	0	58e631ad09e55e10009c7cfe		false	431742	846	102	0	0	0	0	1	undefined	58e62ffd09e55e10009c79d9
	false	undefined	0							undefined	0	58e631ad09e55e10009c7cff		true	432286	847	99	0	0	0	0	1	undefined	58e62ffd09e55e10009c79d9
	false	undefined	0							undefined	0	58e631ae09e55e10009c7d00		true	432890	848	107	0	0	0	0	1	undefined	58e62ffd09e55e10009c79d9
	false	undefined	0							undefined	0	58e631ae09e55e10009c7d01		true	433415	849	111	0	0	0	0	1	undefined	58e62ffd09e55e10009c79d9
	false	undefined	0							undefined	0	58e631af09e55e10009c7d02		true	433886	850	105	0	0	0	0	1	undefined	58e62ffd09e55e10009c79d9
	false	undefined	0							undefined	0	58e631af09e55e10009c7d03		true	434406	851	-1	0	0	0	0	1	undefined	58e62ffd09e55e10009c79d9
	false	undefined	0							undefined	0	58e631b009e55e10009c7d04		true	434954	852	-1	0	0	0	0	1	undefined	58e62ffd09e55e10009c79d9
	false	undefined	0							undefined	0	58e631b009e55e10009c7d05		true	435561	853	-1	0	0	0	0	1	undefined	58e62ffd09e55e10009c79d9
	false	undefined	0							undefined	0	58e631b109e55e10009c7d06		true	436091	857	-1	0	0	0	0	1	undefined	58e62ffd09e55e10009c79d9
	false	undefined	0							undefined	0	58e631b109e55e10009c7d07		true	436628	858	-1	0	0	0	0	1	undefined	58e62ffd09e55e10009c79d9
	false	undefined	0							undefined	0	58e631b209e55e10009c7d08		true	437160	859	-1	0	0	0	0	1	undefined	58e62ffd09e55e10009c79d9
	false	undefined	0							undefined	0	58e631b209e55e10009c7d09		true	437694	860	-1	0	0	0	0	1	undefined	58e62ffd09e55e10009c79d9
	false	undefined	0							undefined	0	58e631b309e55e10009c7d0a		true	438233	861	-1	0	0	0	0	1	undefined	58e62ffd09e55e10009c79d9
	false	undefined	0							undefined	0	58e631b409e55e10009c7d0b		true	438765	862	-1	0	0	0	0	1	undefined	58e62ffd09e55e10009c79d9
	false	undefined	0							undefined	0	58e631b409e55e10009c7d0c		true	439285	863	-1	0	0	0	0	1	undefined	58e62ffd09e55e10009c79d9
	false	undefined	0							undefined	0	58e631b509e55e10009c7d0d		true	439828	864	-1	0	0	0	0	1	undefined	58e62ffd09e55e10009c79d9
	false	undefined	0							undefined	0	58e631b509e55e10009c7d0e		true	440286	865	66	0	0	0	0	1	undefined	58e62ffd09e55e10009c79d9
	false	undefined	0							undefined	0	58e631b609e55e10009c7d0f		false	440847	866	66	0	0	0	0	1	undefined	58e62ffd09e55e10009c79d9
	false	undefined	0							undefined	0	58e631b609e55e10009c7d10		false	441375	867	66	0	0	0	0	1	undefined	58e62ffd09e55e10009c79d9
	false	undefined	0							undefined	0	58e631b709e55e10009c7d11		false	441903	871	68	0	0	0	0	1	undefined	58e62ffd09e55e10009c79d9
	false	undefined	0							undefined	0	58e631b709e55e10009c7d12		true	442434	872	66	0	0	0	0	1	undefined	58e62ffd09e55e10009c79d9
	false	undefined	0							undefined	0	58e631b809e55e10009c7d13		false	442966	873	65	0	0	0	0	1	undefined	58e62ffd09e55e10009c79d9
	false	undefined	0							undefined	0	58e631b809e55e10009c7d14		true	443495	874	68	0	0	0	0	1	undefined	58e62ffd09e55e10009c79d9
	false	undefined	0							undefined	0	58e631b909e55e10009c7d15		true	444049	875	62	0	0	0	0	1	undefined	58e62ffd09e55e10009c79d9
	false	undefined	0							undefined	0	58e631b909e55e10009c7d16		true	444568	876	63	0	0	0	0	1	undefined	58e62ffd09e55e10009c79d9
	false	undefined	0							undefined	0	58e631ba09e55e10009c7d17		true	445042	886	66	0	0	0	0	1	undefined	58e62ffd09e55e10009c79d9
	false	undefined	0							undefined	0	58e631ba09e55e10009c7d18		true	445647	887	-1	0	0	0	0	1	undefined	58e62ffd09e55e10009c79d9
	false	undefined	0							undefined	0	58e631bb09e55e10009c7d19		true	446168	888	-1	0	0	0	0	1	undefined	58e62ffd09e55e10009c79d9
	false	undefined	0							undefined	0	58e631bb09e55e10009c7d1a		true	446708	889	-1	0	0	0	0	1	undefined	58e62ffd09e55e10009c79d9
	false	undefined	0							undefined	0	58e631bc09e55e10009c7d1b		true	447186	890	-1	0	0	0	0	1	undefined	58e62ffd09e55e10009c79d9
	false	undefined	0							undefined	0	58e631bd09e55e10009c7d1c		true	447790	891	-1	0	0	0	0	1	undefined	58e62ffd09e55e10009c79d9
	false	undefined	0							undefined	0	58e631bd09e55e10009c7d1d		true	448312	892	78	0	0	0	0	1	undefined	58e62ffd09e55e10009c79d9
	false	undefined	0							undefined	0	58e631be09e55e10009c7d1e		true	448911	893	74	0	0	0	0	1	undefined	58e62ffd09e55e10009c79d9
	false	undefined	0							undefined	0	58e631be09e55e10009c7d1f		true	449444	894	78	0	0	0	0	1	undefined	58e62ffd09e55e10009c79d9
	false	undefined	0							undefined	0	58e631bf09e55e10009c7d20		true	449976	898	80	0	0	0	0	1	undefined	58e62ffd09e55e10009c79d9
	false	undefined	0							undefined	0	58e631bf09e55e10009c7d21		true	450524	899	-1	0	0	0	0	1	undefined	58e62ffd09e55e10009c79d9
	false	undefined	0							undefined	0	58e631c009e55e10009c7d22		true	451056	900	-1	0	0	0	0	1	undefined	58e62ffd09e55e10009c79d9
	false	undefined	0							undefined	0	58e631c009e55e10009c7d23		true	451584	901	-1	0	0	0	0	1	undefined	58e62ffd09e55e10009c79d9
	false	undefined	0							undefined	0	58e631c109e55e10009c7d24		true	452058	902	-1	0	0	0	0	1	undefined	58e62ffd09e55e10009c79d9
	false	undefined	0							undefined	0	58e631c209e55e10009c7d25		true	452700	903	-1	0	0	0	0	1	undefined	58e62ffd09e55e10009c79d9
	false	undefined	0							undefined	0	58e631c209e55e10009c7d26		true	453206	904	-1	0	0	0	0	1	undefined	58e62ffd09e55e10009c79d9
	false	undefined	0							undefined	0	58e631c309e55e10009c7d27		true	453787	905	-1	0	0	0	0	1	undefined	58e62ffd09e55e10009c79d9
	false	undefined	0							undefined	0	58e631c309e55e10009c7d28		true	454280	906	-1	0	0	0	0	1	undefined	58e62ffd09e55e10009c79d9
	false	undefined	0							undefined	0	58e631c409e55e10009c7d29		true	454862	907	-1	0	0	0	0	1	undefined	58e62ffd09e55e10009c79d9
	false	undefined	0							undefined	0	58e631c409e55e10009c7d2a		true	455394	908	-1	0	0	0	0	1	undefined	58e62ffd09e55e10009c79d9
	false	undefined	0							undefined	0	58e631c509e55e10009c7d2b		true	455850	909	115	0	0	0	0	1	undefined	58e62ffd09e55e10009c79d9
	false	undefined	0							undefined	0	58e631c509e55e10009c7d2c		false	456462	910	116	0	0	0	0	1	undefined	58e62ffd09e55e10009c79d9
	false	undefined	0							undefined	0	58e631c609e55e10009c7d2d		false	457002	911	98	0	0	0	0	1	undefined	58e62ffd09e55e10009c79d9
	false	undefined	0							undefined	0	58e631c609e55e10009c7d2e		false	457478	915	116	0	0	0	0	1	undefined	58e62ffd09e55e10009c79d9
	false	undefined	0							undefined	0	58e631c709e55e10009c7d2f		false	458066	916	116	0	0	0	0	1	undefined	58e62ffd09e55e10009c79d9
	false	undefined	0							undefined	0	58e631c709e55e10009c7d30		false	458665	917	113	0	0	0	0	1	undefined	58e62ffd09e55e10009c79d9
	false	undefined	0							undefined	0	58e631c809e55e10009c7d31		false	459181	918	114	0	0	0	0	1	undefined	58e62ffd09e55e10009c79d9
	false	undefined	0							undefined	0	58e631c909e55e10009c7d32		false	459747	919	110	0	0	0	0	1	undefined	58e62ffd09e55e10009c79d9
	false	undefined	0							undefined	0	58e631c909e55e10009c7d33		false	460270	920	108	0	0	0	0	1	undefined	58e62ffd09e55e10009c79d9
	false	undefined	0							undefined	0	58e631ca09e55e10009c7d34		false	460790	921	110	0	0	0	0	1	undefined	58e62ffd09e55e10009c79d9
	false	undefined	0							undefined	0	58e631ca09e55e10009c7d35		false	461337	922	114	0	0	0	0	1	undefined	58e62ffd09e55e10009c79d9
	false	undefined	0							undefined	0	58e631cb09e55e10009c7d36		false	461890	923	116	0	0	0	0	1	undefined	58e62ffd09e55e10009c79d9
	false	undefined	0							undefined	0	58e631cb09e55e10009c7d37		false	462408	924	114	0	0	0	0	1	undefined	58e62ffd09e55e10009c79d9
	false	undefined	0							undefined	0	58e631cc09e55e10009c7d38		false	462938	925	113	0	0	0	0	1	undefined	58e62ffd09e55e10009c79d9
	false	undefined	0							undefined	0	58e631cc09e55e10009c7d39		false	463481	926	115	0	0	0	0	1	undefined	58e62ffd09e55e10009c79d9
	false	undefined	0							undefined	0	58e631cd09e55e10009c7d3a		false	464004	927	113	0	0	0	0	1	undefined	58e62ffd09e55e10009c79d9
	false	undefined	0							undefined	0	58e631cd09e55e10009c7d3b		false	464548	928	113	0	0	0	0	1	undefined	58e62ffd09e55e10009c79d9
	false	undefined	0							undefined	0	58e631ce09e55e10009c7d3c		false	465161	929	111	0	0	0	0	1	undefined	58e62ffd09e55e10009c79d9
	false	undefined	0							undefined	0	58e631ce09e55e10009c7d3d		false	465669	930	111	0	0	0	0	1	undefined	58e62ffd09e55e10009c79d9
	false	undefined	0							undefined	0	58e631cf09e55e10009c7d3e		false	466222	931	111	0	0	0	0	1	undefined	58e62ffd09e55e10009c79d9
	false	undefined	0							undefined	0	58e631d009e55e10009c7d3f		false	466758	932	110	0	0	0	0	1	undefined	58e62ffd09e55e10009c79d9
	false	undefined	0							undefined	0	58e631d009e55e10009c7d40		false	467284	933	113	0	0	0	0	1	undefined	58e62ffd09e55e10009c79d9
	false	undefined	0							undefined	0	58e631d109e55e10009c7d41		false	467752	934	113	0	0	0	0	1	undefined	58e62ffd09e55e10009c79d9
	false	undefined	0							undefined	0	58e631d109e55e10009c7d42		false	468369	935	113	0	0	0	0	1	undefined	58e62ffd09e55e10009c79d9
	false	undefined	0							undefined	0	58e631d209e55e10009c7d43		false	468900	936	112	0	0	0	0	1	undefined	58e62ffd09e55e10009c79d9
	false	undefined	0							undefined	0	58e631d209e55e10009c7d44		false	469418	937	111	0	0	0	0	1	undefined	58e62ffd09e55e10009c79d9
	false	undefined	0							undefined	0	58e631d309e55e10009c7d45		false	469962	938	110	0	0	0	0	1	undefined	58e62ffd09e55e10009c79d9
	false	undefined	0							undefined	0	58e631d309e55e10009c7d46		false	470486	939	108	0	0	0	0	1	undefined	58e62ffd09e55e10009c79d9
	false	undefined	0							undefined	0	58e631d409e55e10009c7d47		false	471038	940	107	0	0	0	0	1	undefined	58e62ffd09e55e10009c79d9
	false	undefined	0							undefined	0	58e631d409e55e10009c7d48		false	471572	941	107	0	0	0	0	1	undefined	58e62ffd09e55e10009c79d9
	false	undefined	0							undefined	0	58e631d509e55e10009c7d49		false	472084	942	110	0	0	0	0	1	undefined	58e62ffd09e55e10009c79d9
	false	undefined	0							undefined	0	58e631d509e55e10009c7d4a		false	472576	943	112	0	0	0	0	1	undefined	58e62ffd09e55e10009c79d9
	false	undefined	0							undefined	0	58e631d609e55e10009c7d4b		false	473165	944	111	0	0	0	0	1	undefined	58e62ffd09e55e10009c79d9
	false	undefined	0							undefined	0	58e631d609e55e10009c7d4c		false	473694	945	110	0	0	0	0	1	undefined	58e62ffd09e55e10009c79d9
	false	undefined	0							undefined	0	58e631d709e55e10009c7d4d		false	474190	946	112	0	0	0	0	1	undefined	58e62ffd09e55e10009c79d9
	false	undefined	0							undefined	0	58e631d809e55e10009c7d4e		false	474776	947	113	0	0	0	0	1	undefined	58e62ffd09e55e10009c79d9
	false	undefined	0							undefined	0	58e631d809e55e10009c7d4f		false	475380	948	113	0	0	0	0	1	undefined	58e62ffd09e55e10009c79d9
	false	undefined	0							undefined	0	58e631d909e55e10009c7d50		false	475904	949	110	0	0	0	0	1	undefined	58e62ffd09e55e10009c79d9
	false	undefined	0							undefined	0	58e631d909e55e10009c7d51		false	476355	950	105	0	0	0	0	1	undefined	58e62ffd09e55e10009c79d9
	false	undefined	0							undefined	0	58e631da09e55e10009c7d52		true	476901	951	90	0	0	0	0	1	undefined	58e62ffd09e55e10009c79d9
	false	undefined	0							undefined	0	58e631da09e55e10009c7d53		true	477378	952	90	0	0	0	0	1	undefined	58e62ffd09e55e10009c79d9
	false	undefined	0							undefined	0	58e631db09e55e10009c7d54		false	477982	953	106	0	0	0	0	1	undefined	58e62ffd09e55e10009c79d9
	false	undefined	0							undefined	0	58e631db09e55e10009c7d55		false	478516	954	110	0	0	0	0	1	undefined	58e62ffd09e55e10009c79d9
	false	undefined	0							undefined	0	58e631dc09e55e10009c7d56		false	479043	955	110	0	0	0	0	1	undefined	58e62ffd09e55e10009c79d9
	false	undefined	0							undefined	0	58e631dc09e55e10009c7d57		false	479650	956	114	0	0	0	0	1	undefined	58e62ffd09e55e10009c79d9
	false	undefined	0							undefined	0	58e631dd09e55e10009c7d58		false	480175	957	112	0	0	0	0	1	undefined	58e62ffd09e55e10009c79d9
	false	undefined	0							undefined	0	58e631dd09e55e10009c7d59		false	480718	958	113	0	0	0	0	1	undefined	58e62ffd09e55e10009c79d9
	false	undefined	0							undefined	0	58e631de09e55e10009c7d5a		false	481248	959	111	0	0	0	0	1	undefined	58e62ffd09e55e10009c79d9
	false	undefined	0							undefined	0	58e631df09e55e10009c7d5b		false	481784	960	111	0	0	0	0	1	undefined	58e62ffd09e55e10009c79d9
	false	undefined	0							undefined	0	58e631df09e55e10009c7d5c		false	482384	961	113	0	0	0	0	1	undefined	58e62ffd09e55e10009c79d9
	false	undefined	0							undefined	0	58e631e009e55e10009c7d5d		false	482904	962	113	0	0	0	0	1	undefined	58e62ffd09e55e10009c79d9
	false	undefined	0							undefined	0	58e631e009e55e10009c7d5e		false	483445	963	111	0	0	0	0	1	undefined	58e62ffd09e55e10009c79d9
	false	undefined	0							undefined	0	58e631e109e55e10009c7d5f		false	483980	964	108	0	0	0	0	1	undefined	58e62ffd09e55e10009c79d9
	false	undefined	0							undefined	0	58e631e109e55e10009c7d60		false	484523	965	105	0	0	0	0	1	undefined	58e62ffd09e55e10009c79d9
	false	undefined	0							undefined	0	58e631e209e55e10009c7d61		false	485057	966	108	0	0	0	0	1	undefined	58e62ffd09e55e10009c79d9
	false	undefined	0							undefined	0	58e631e209e55e10009c7d62		false	485585	967	111	0	0	0	0	1	undefined	58e62ffd09e55e10009c79d9
	false	undefined	0							undefined	0	58e631e309e55e10009c7d63		false	486069	968	112	0	0	0	0	1	undefined	58e62ffd09e55e10009c79d9
	false	undefined	0							undefined	0	58e631e309e55e10009c7d64		false	486609	969	111	0	0	0	0	1	undefined	58e62ffd09e55e10009c79d9
	false	undefined	0							undefined	0	58e631e409e55e10009c7d65		false	487195	970	109	0	0	0	0	1	undefined	58e62ffd09e55e10009c79d9
	false	undefined	0							undefined	0	58e631e509e55e10009c7d66		false	487779	971	116	0	0	0	0	1	undefined	58e62ffd09e55e10009c79d9
	false	undefined	0							undefined	0	58e631e509e55e10009c7d67		false	488259	972	115	0	0	0	0	1	undefined	58e62ffd09e55e10009c79d9
	false	undefined	0							undefined	0	58e631e609e55e10009c7d68		false	488780	973	114	0	0	0	0	1	undefined	58e62ffd09e55e10009c79d9
	false	undefined	0							undefined	0	58e631e609e55e10009c7d69		false	489319	974	110	0	0	0	0	1	undefined	58e62ffd09e55e10009c79d9
	false	undefined	0							undefined	0	58e631e709e55e10009c7d6a		false	489876	975	108	0	0	0	0	1	undefined	58e62ffd09e55e10009c79d9
	false	undefined	0							undefined	0	58e631e709e55e10009c7d6b		false	490481	976	109	0	0	0	0	1	undefined	58e62ffd09e55e10009c79d9
	false	undefined	0							undefined	0	58e631e809e55e10009c7d6c		false	490991	977	107	0	0	0	0	1	undefined	58e62ffd09e55e10009c79d9
	false	undefined	0							undefined	0	58e631e809e55e10009c7d6d		false	491535	978	112	0	0	0	0	1	undefined	58e62ffd09e55e10009c79d9
	false	undefined	0							undefined	0	58e631e909e55e10009c7d6e		false	492055	979	114	0	0	0	0	1	undefined	58e62ffd09e55e10009c79d9
	false	undefined	0							undefined	0	58e631e909e55e10009c7d6f		false	492608	980	113	0	0	0	0	1	undefined	58e62ffd09e55e10009c79d9
	false	undefined	0							undefined	0	58e631ea09e55e10009c7d70		false	493144	981	114	0	0	0	0	1	undefined	58e62ffd09e55e10009c79d9
	false	undefined	0							undefined	0	58e631ea09e55e10009c7d71		false	493674	982	115	0	0	0	0	1	undefined	58e62ffd09e55e10009c79d9
	false	undefined	0							undefined	0	58e631eb09e55e10009c7d72		false	494196	983	114	0	0	0	0	1	undefined	58e62ffd09e55e10009c79d9
	false	undefined	0							undefined	0	58e631ec09e55e10009c7d73		true	494749	984	104	0	0	0	0	1	undefined	58e62ffd09e55e10009c79d9
	false	undefined	0							undefined	0	58e631ec09e55e10009c7d74		true	495405	985	105	0	0	0	0	1	undefined	58e62ffd09e55e10009c79d9
	false	undefined	0							undefined	0	58e631ed09e55e10009c7d75		true	495968	986	113	0	0	0	0	1	undefined	58e62ffd09e55e10009c79d9
	false	undefined	0							undefined	0	58e631ed09e55e10009c7d76		false	496472	987	116	0	0	0	0	1	undefined	58e62ffd09e55e10009c79d9
	false	undefined	0							undefined	0	58e631ee09e55e10009c7d77		false	497018	988	110	0	0	0	0	1	undefined	58e62ffd09e55e10009c79d9
	false	undefined	0							undefined	0	58e631ee09e55e10009c7d78		false	497620	989	109	0	0	0	0	1	undefined	58e62ffd09e55e10009c79d9
	false	undefined	0							undefined	0	58e631ef09e55e10009c7d79		false	498137	990	110	0	0	0	0	1	undefined	58e62ffd09e55e10009c79d9
	false	undefined	0							undefined	0	58e631ef09e55e10009c7d7a		false	498611	991	109	0	0	0	0	1	undefined	58e62ffd09e55e10009c79d9
	false	undefined	0							undefined	0	58e631f009e55e10009c7d7b		false	499209	992	107	0	0	0	0	1	undefined	58e62ffd09e55e10009c79d9
	false	undefined	0							undefined	0	58e631f009e55e10009c7d7c		false	499676	993	104	0	0	0	0	1	undefined	58e62ffd09e55e10009c79d9
	false	undefined	0							undefined	0	58e631f109e55e10009c7d7d		false	500225	994	111	0	0	0	0	1	undefined	58e62ffd09e55e10009c79d9
	false	undefined	0							undefined	0	58e631f209e55e10009c7d7e		false	500746	995	114	0	0	0	0	1	undefined	58e62ffd09e55e10009c79d9
	false	undefined	0							undefined	0	58e631f209e55e10009c7d7f		true	501272	996	110	0	0	0	0	1	undefined	58e62ffd09e55e10009c79d9
	false	undefined	0							undefined	0	58e631f309e55e10009c7d80		true	501820	997	111	0	0	0	0	1	undefined	58e62ffd09e55e10009c79d9
	false	undefined	0							undefined	0	58e631f309e55e10009c7d81		true	502287	998	109	0	0	0	0	1	undefined	58e62ffd09e55e10009c79d9
	false	undefined	0							undefined	0	58e631f409e55e10009c7d82		false	502815	999	112	0	0	0	0	1	undefined	58e62ffd09e55e10009c79d9
	false	undefined	0							undefined	0	58e631f409e55e10009c7d83		false	503366	1000	114	0	0	0	0	1	undefined	58e62ffd09e55e10009c79d9
	false	undefined	0							undefined	0	58e631f509e55e10009c7d84		false	503821	1001	115	0	0	0	0	1	undefined	58e62ffd09e55e10009c79d9
	false	undefined	0							undefined	0	58e631f509e55e10009c7d85		false	504362	1002	114	0	0	0	0	1	undefined	58e62ffd09e55e10009c79d9
	false	undefined	0							undefined	0	58e631f609e55e10009c7d86		true	504901	1003	110	0	0	0	0	1	undefined	58e62ffd09e55e10009c79d9
	false	undefined	0							undefined	0	58e631f609e55e10009c7d87		true	505424	1004	110	0	0	0	0	1	undefined	58e62ffd09e55e10009c79d9
	false	undefined	0							undefined	0	58e631f709e55e10009c7d88		false	505960	1005	108	0	0	0	0	1	undefined	58e62ffd09e55e10009c79d9
	false	undefined	0							undefined	0	58e631f709e55e10009c7d89		false	506410	1006	108	0	0	0	0	1	undefined	58e62ffd09e55e10009c79d9
	false	undefined	0							undefined	0	58e631f809e55e10009c7d8a		false	506977	1007	110	0	0	0	0	1	undefined	58e62ffd09e55e10009c79d9
	false	undefined	0							undefined	0	58e631f809e55e10009c7d8b		false	507503	1008	109	0	0	0	0	1	undefined	58e62ffd09e55e10009c79d9
	false	undefined	0							undefined	0	58e631f909e55e10009c7d8c		false	508034	1009	112	0	0	0	0	1	undefined	58e62ffd09e55e10009c79d9
	false	undefined	0							undefined	0	58e631f909e55e10009c7d8d		false	508557	1010	115	0	0	0	0	1	undefined	58e62ffd09e55e10009c79d9
	false	undefined	0							undefined	0	58e631fa09e55e10009c7d8e		false	509101	1011	114	0	0	0	0	1	undefined	58e62ffd09e55e10009c79d9
	false	undefined	0							undefined	0	58e631fa09e55e10009c7d8f		false	509580	1012	114	0	0	0	0	1	undefined	58e62ffd09e55e10009c79d9
	false	undefined	0							undefined	0	58e631fb09e55e10009c7d90		false	510125	1013	114	0	0	0	0	1	undefined	58e62ffd09e55e10009c79d9
	false	undefined	0							undefined	0	58e631fb09e55e10009c7d91		false	510717	1014	116	0	0	0	0	1	undefined	58e62ffd09e55e10009c79d9
	false	undefined	0							undefined	0	58e631fc09e55e10009c7d92		false	511246	1015	114	0	0	0	0	1	undefined	58e62ffd09e55e10009c79d9
	false	undefined	0							undefined	0	58e631fd09e55e10009c7d93		false	511772	1016	112	0	0	0	0	1	undefined	58e62ffd09e55e10009c79d9
	false	undefined	0							undefined	0	58e631fd09e55e10009c7d94		false	512376	1017	113	0	0	0	0	1	undefined	58e62ffd09e55e10009c79d9
	false	undefined	0							undefined	0	58e631fe09e55e10009c7d95		false	512903	1018	116	0	0	0	0	1	undefined	58e62ffd09e55e10009c79d9
	false	undefined	0							undefined	0	58e631fe09e55e10009c7d96		false	513440	1019	116	0	0	0	0	1	undefined	58e62ffd09e55e10009c79d9
	false	undefined	0							undefined	0	58e631ff09e55e10009c7d97		false	514114	1020	113	0	0	0	0	1	undefined	58e62ffd09e55e10009c79d9
	false	undefined	0							undefined	0	58e631ff09e55e10009c7d98		false	514644	1021	113	0	0	0	0	1	undefined	58e62ffd09e55e10009c79d9
	false	undefined	0							undefined	0	58e6320009e55e10009c7d99		false	515182	1022	113	0	0	0	0	1	undefined	58e62ffd09e55e10009c79d9
	false	undefined	0							undefined	0	58e6320009e55e10009c7d9a		false	515712	1023	112	0	0	0	0	1	undefined	58e62ffd09e55e10009c79d9
	false	undefined	0							undefined	0	58e6320109e55e10009c7d9b		false	516331	1024	108	0	0	0	0	1	undefined	58e62ffd09e55e10009c79d9
	false	undefined	0							undefined	0	58e6320209e55e10009c7d9c		true	516929	1025	111	0	0	0	0	1	undefined	58e62ffd09e55e10009c79d9
	false	undefined	0							undefined	0	58e6320209e55e10009c7d9d		true	517457	1026	114	0	0	0	0	1	undefined	58e62ffd09e55e10009c79d9
	false	undefined	0							undefined	0	58e6320309e55e10009c7d9e		true	518053	1027	115	0	0	0	0	1	undefined	58e62ffd09e55e10009c79d9
	false	undefined	0							undefined	0	58e6320309e55e10009c7d9f		false	518529	1028	114	0	0	0	0	1	undefined	58e62ffd09e55e10009c79d9
	false	undefined	0							undefined	0	58e6320409e55e10009c7da0		false	519132	1029	113	0	0	0	0	1	undefined	58e62ffd09e55e10009c79d9
	false	undefined	0							undefined	0	58e6320509e55e10009c7da1		false	519736	1030	111	0	0	0	0	1	undefined	58e62ffd09e55e10009c79d9
	false	undefined	0							undefined	0	58e6320509e55e10009c7da2		false	520259	1031	109	0	0	0	0	1	undefined	58e62ffd09e55e10009c79d9
	false	undefined	0							undefined	0	58e6320609e55e10009c7da3		false	520805	1032	110	0	0	0	0	1	undefined	58e62ffd09e55e10009c79d9
	false	undefined	0							undefined	0	58e6320609e55e10009c7da4		true	521324	1033	112	0	0	0	0	1	undefined	58e62ffd09e55e10009c79d9
	false	undefined	0							undefined	0	58e6320709e55e10009c7da5		false	521861	1034	115	0	0	0	0	1	undefined	58e62ffd09e55e10009c79d9
	false	undefined	0							undefined	0	58e6320709e55e10009c7da6		false	522393	1035	115	0	0	0	0	1	undefined	58e62ffd09e55e10009c79d9
	false	undefined	0							undefined	0	58e6320809e55e10009c7da7		false	522925	1036	112	0	0	0	0	1	undefined	58e62ffd09e55e10009c79d9
	false	undefined	0							undefined	0	58e6320809e55e10009c7da8		false	523456	1037	113	0	0	0	0	1	undefined	58e62ffd09e55e10009c79d9
	false	undefined	0							undefined	0	58e6320909e55e10009c7da9		false	524004	1038	111	0	0	0	0	1	undefined	58e62ffd09e55e10009c79d9
	false	undefined	0							undefined	0	58e6320909e55e10009c7daa		false	524603	1039	112	0	0	0	0	1	undefined	58e62ffd09e55e10009c79d9
	false	undefined	0							undefined	0	58e6320a09e55e10009c7dab		false	525134	1040	111	0	0	0	0	1	undefined	58e62ffd09e55e10009c79d9
	false	undefined	0							undefined	0	58e6320a09e55e10009c7dac		false	525679	1041	111	0	0	0	0	1	undefined	58e62ffd09e55e10009c79d9
	false	undefined	0							undefined	0	58e6320b09e55e10009c7dad		false	526201	1042	114	0	0	0	0	1	undefined	58e62ffd09e55e10009c79d9
	false	undefined	0							undefined	0	58e6320c09e55e10009c7dae		false	526817	1043	115	0	0	0	0	1	undefined	58e62ffd09e55e10009c79d9
	false	undefined	0							undefined	0	58e6320c09e55e10009c7daf		false	527331	1044	116	0	0	0	0	1	undefined	58e62ffd09e55e10009c79d9
	false	undefined	0							undefined	0	58e6320d09e55e10009c7db0		false	527881	1045	114	0	0	0	0	1	undefined	58e62ffd09e55e10009c79d9
	false	undefined	0							undefined	0	58e6320d09e55e10009c7db1		false	528401	1046	117	0	0	0	0	1	undefined	58e62ffd09e55e10009c79d9
	false	undefined	0							undefined	0	58e6320e09e55e10009c7db2		false	528944	1047	114	0	0	0	0	1	undefined	58e62ffd09e55e10009c79d9
	false	undefined	0							undefined	0	58e6320e09e55e10009c7db3		false	529426	1048	113	0	0	0	0	1	undefined	58e62ffd09e55e10009c79d9
	false	undefined	0							undefined	0	58e6320f09e55e10009c7db4		false	529942	1049	111	0	0	0	0	1	undefined	58e62ffd09e55e10009c79d9
	false	undefined	0							undefined	0	58e6320f09e55e10009c7db5		false	530568	1050	112	0	0	0	0	1	undefined	58e62ffd09e55e10009c79d9
	false	undefined	0							undefined	0	58e6321009e55e10009c7db6		false	531157	1051	116	0	0	0	0	1	undefined	58e62ffd09e55e10009c79d9
	false	undefined	0							undefined	0	58e6321009e55e10009c7db7		false	531683	1052	113	0	0	0	0	1	undefined	58e62ffd09e55e10009c79d9
	false	undefined	0							undefined	0	58e6321109e55e10009c7db8		false	532216	1053	114	0	0	0	0	1	undefined	58e62ffd09e55e10009c79d9
	false	undefined	0							undefined	0	58e6321209e55e10009c7db9		false	532754	1054	113	0	0	0	0	1	undefined	58e62ffd09e55e10009c79d9
	false	undefined	0							undefined	0	58e6321209e55e10009c7dba		false	533360	1055	116	0	0	0	0	1	undefined	58e62ffd09e55e10009c79d9
	false	undefined	0							undefined	0	58e6321309e55e10009c7dbb		false	533870	1056	117	0	0	0	0	1	undefined	58e62ffd09e55e10009c79d9
	false	undefined	0							undefined	0	58e6321309e55e10009c7dbc		false	534420	1057	114	0	0	0	0	1	undefined	58e62ffd09e55e10009c79d9
	false	undefined	0							undefined	0	58e6321409e55e10009c7dbd		false	534945	1058	116	0	0	0	0	1	undefined	58e62ffd09e55e10009c79d9
	false	undefined	0							undefined	0	58e6321409e55e10009c7dbe		false	535487	1059	113	0	0	0	0	1	undefined	58e62ffd09e55e10009c79d9
	false	undefined	0							undefined	0	58e6321509e55e10009c7dbf		false	536016	1060	110	0	0	0	0	1	undefined	58e62ffd09e55e10009c79d9
	false	undefined	0							undefined	0	58e6321509e55e10009c7dc0		false	536561	1061	109	0	0	0	0	1	undefined	58e62ffd09e55e10009c79d9
	false	undefined	0							undefined	0	58e6321609e55e10009c7dc1		false	537091	1062	111	0	0	0	0	1	undefined	58e62ffd09e55e10009c79d9
	false	undefined	0							undefined	0	58e6321609e55e10009c7dc2		false	537623	1063	114	0	0	0	0	1	undefined	58e62ffd09e55e10009c79d9
	false	undefined	0							undefined	0	58e6321709e55e10009c7dc3		false	538118	1064	115	0	0	0	0	1	undefined	58e62ffd09e55e10009c79d9
	false	undefined	0							undefined	0	58e6321709e55e10009c7dc4		false	538615	1065	112	0	0	0	0	1	undefined	58e62ffd09e55e10009c79d9
	false	undefined	0							undefined	0	58e6321809e55e10009c7dc5		false	539169	1066	112	0	0	0	0	1	undefined	58e62ffd09e55e10009c79d9
	false	undefined	0							undefined	0	58e6321809e55e10009c7dc6		false	539704	1067	111	0	0	0	0	1	undefined	58e62ffd09e55e10009c79d9
	false	undefined	0							undefined	0	58e6321909e55e10009c7dc7		false	540234	1068	111	0	0	0	0	1	undefined	58e62ffd09e55e10009c79d9
	false	undefined	0							undefined	0	58e6321a09e55e10009c7dc8		false	540765	1069	110	0	0	0	0	1	undefined	58e62ffd09e55e10009c79d9
	false	undefined	0							undefined	0	58e6321a09e55e10009c7dc9		false	541300	1070	110	0	0	0	0	1	undefined	58e62ffd09e55e10009c79d9
	false	undefined	0							undefined	0	58e6321b09e55e10009c7dca		false	541835	1071	114	0	0	0	0	1	undefined	58e62ffd09e55e10009c79d9
	false	undefined	0							undefined	0	58e6321b09e55e10009c7dcb		false	542358	1072	115	0	0	0	0	1	undefined	58e62ffd09e55e10009c79d9
	false	undefined	0							undefined	0	58e6321c09e55e10009c7dcc		false	542892	1073	116	0	0	0	0	1	undefined	58e62ffd09e55e10009c79d9
	false	undefined	0							undefined	0	58e6321c09e55e10009c7dcd		false	543437	1074	113	0	0	0	0	1	undefined	58e62ffd09e55e10009c79d9
	false	undefined	0							undefined	0	58e6321d09e55e10009c7dce		false	543987	1075	112	0	0	0	0	1	undefined	58e62ffd09e55e10009c79d9
	false	undefined	0							undefined	0	58e6321d09e55e10009c7dcf		false	544580	1076	110	0	0	0	0	1	undefined	58e62ffd09e55e10009c79d9
	false	undefined	0							undefined	0	58e6321e09e55e10009c7dd0		false	545110	1077	112	0	0	0	0	1	undefined	58e62ffd09e55e10009c79d9
	false	undefined	0							undefined	0	58e6321e09e55e10009c7dd1		false	545636	1078	114	0	0	0	0	1	undefined	58e62ffd09e55e10009c79d9
	false	undefined	0							undefined	0	58e6321f09e55e10009c7dd2		false	546173	1079	116	0	0	0	0	1	undefined	58e62ffd09e55e10009c79d9
	false	undefined	0							undefined	0	58e6321f09e55e10009c7dd3		false	546716	1080	112	0	0	0	0	1	undefined	58e62ffd09e55e10009c79d9
	false	undefined	0							undefined	0	58e6322009e55e10009c7dd4		false	547233	1081	110	0	0	0	0	1	undefined	58e62ffd09e55e10009c79d9
	false	undefined	0							undefined	0	58e6322109e55e10009c7dd5		false	547766	1082	108	0	0	0	0	1	undefined	58e62ffd09e55e10009c79d9
	false	undefined	0							undefined	0	58e6322109e55e10009c7dd6		false	548263	1083	108	0	0	0	0	1	undefined	58e62ffd09e55e10009c79d9
	false	undefined	0							undefined	0	58e6322209e55e10009c7dd7		false	548851	1084	110	0	0	0	0	1	undefined	58e62ffd09e55e10009c79d9
	false	undefined	0							undefined	0	58e6322209e55e10009c7dd8		false	549368	1085	112	0	0	0	0	1	undefined	58e62ffd09e55e10009c79d9
	false	undefined	0							undefined	0	58e6322309e55e10009c7dd9		false	549920	1086	112	0	0	0	0	1	undefined	58e62ffd09e55e10009c79d9
	false	undefined	0							undefined	0	58e6322309e55e10009c7dda		false	550450	1087	110	0	0	0	0	1	undefined	58e62ffd09e55e10009c79d9
	false	undefined	0							undefined	0	58e6322409e55e10009c7ddb		false	550982	1088	111	0	0	0	0	1	undefined	58e62ffd09e55e10009c79d9
	false	undefined	0							undefined	0	58e6322409e55e10009c7ddc		false	551518	1089	111	0	0	0	0	1	undefined	58e62ffd09e55e10009c79d9
	false	undefined	0							undefined	0	58e6322509e55e10009c7ddd		false	552045	1090	111	0	0	0	0	1	undefined	58e62ffd09e55e10009c79d9
	false	undefined	0							undefined	0	58e6322509e55e10009c7dde		false	552599	1091	110	0	0	0	0	1	undefined	58e62ffd09e55e10009c79d9
	false	undefined	0							undefined	0	58e6322609e55e10009c7ddf		false	553127	1092	112	0	0	0	0	1	undefined	58e62ffd09e55e10009c79d9
	false	undefined	0							undefined	0	58e6322609e55e10009c7de0		false	553662	1093	114	0	0	0	0	1	undefined	58e62ffd09e55e10009c79d9
	false	undefined	0							undefined	0	58e6322709e55e10009c7de1		false	554108	1094	109	0	0	0	0	1	undefined	58e62ffd09e55e10009c79d9
	false	undefined	0							undefined	0	58e6322709e55e10009c7de2		false	554653	1095	108	0	0	0	0	1	undefined	58e62ffd09e55e10009c79d9
	false	undefined	0							undefined	0	58e6322809e55e10009c7de3		false	555191	1096	112	0	0	0	0	1	undefined	58e62ffd09e55e10009c79d9
	false	undefined	0							undefined	0	58e6322809e55e10009c7de4		false	555645	1097	113	0	0	0	0	1	undefined	58e62ffd09e55e10009c79d9
	false	undefined	0							undefined	0	58e6322909e55e10009c7de5		false	556194	1098	112	0	0	0	0	1	undefined	58e62ffd09e55e10009c79d9
	false	undefined	0							undefined	0	58e6322a09e55e10009c7de6		false	556732	1099	110	0	0	0	0	1	undefined	58e62ffd09e55e10009c79d9
	false	undefined	0							undefined	0	58e6322a09e55e10009c7de7		false	557277	1100	112	0	0	0	0	1	undefined	58e62ffd09e55e10009c79d9
	false	undefined	0							undefined	0	58e6322b09e55e10009c7de8		false	557794	1101	111	0	0	0	0	1	undefined	58e62ffd09e55e10009c79d9
	false	undefined	0							undefined	0	58e6322b09e55e10009c7de9		false	558320	1102	111	0	0	0	0	1	undefined	58e62ffd09e55e10009c79d9
	false	undefined	0							undefined	0	58e6322c09e55e10009c7dea		false	558872	1103	111	0	0	0	0	1	undefined	58e62ffd09e55e10009c79d9
	false	undefined	0							undefined	0	58e6322c09e55e10009c7deb		false	559403	1104	110	0	0	0	0	1	undefined	58e62ffd09e55e10009c79d9
	false	undefined	0							undefined	0	58e6322d09e55e10009c7dec		false	559990	1105	113	0	0	0	0	1	undefined	58e62ffd09e55e10009c79d9
	false	undefined	0							undefined	0	58e6322d09e55e10009c7ded		false	560467	1106	112	0	0	0	0	1	undefined	58e62ffd09e55e10009c79d9
	false	undefined	0							undefined	0	58e6322e09e55e10009c7dee		false	561000	1107	111	0	0	0	0	1	undefined	58e62ffd09e55e10009c79d9
	false	undefined	0							undefined	0	58e6322e09e55e10009c7def		false	561593	1108	111	0	0	0	0	1	undefined	58e62ffd09e55e10009c79d9
	false	undefined	0							undefined	0	58e6322f09e55e10009c7df0		false	562151	1109	106	0	0	0	0	1	undefined	58e62ffd09e55e10009c79d9
	false	undefined	0							undefined	0	58e6322f09e55e10009c7df1		false	562686	1110	109	0	0	0	0	1	undefined	58e62ffd09e55e10009c79d9
	false	undefined	0							undefined	0	58e6323009e55e10009c7df2		false	563213	1111	113	0	0	0	0	1	undefined	58e62ffd09e55e10009c79d9
	false	undefined	0							undefined	0	58e6323009e55e10009c7df3		false	563738	1112	118	0	0	0	0	1	undefined	58e62ffd09e55e10009c79d9
	false	undefined	0							undefined	0	58e6323109e55e10009c7df4		false	564274	1113	116	0	0	0	0	1	undefined	58e62ffd09e55e10009c79d9
	false	undefined	0							undefined	0	58e6323209e55e10009c7df5		false	564811	1114	113	0	0	0	0	1	undefined	58e62ffd09e55e10009c79d9
	false	undefined	0							undefined	0	58e6323209e55e10009c7df6		false	565333	1115	115	0	0	0	0	1	undefined	58e62ffd09e55e10009c79d9
	false	undefined	0							undefined	0	58e6323309e55e10009c7df7		false	565876	1116	112	0	0	0	0	1	undefined	58e62ffd09e55e10009c79d9
	false	undefined	0							undefined	0	58e6323309e55e10009c7df8		false	566390	1117	112	0	0	0	0	1	undefined	58e62ffd09e55e10009c79d9
	false	undefined	0							undefined	0	58e6323409e55e10009c7df9		false	566961	1118	115	0	0	0	0	1	undefined	58e62ffd09e55e10009c79d9
	false	undefined	0							undefined	0	58e6323409e55e10009c7dfa		false	567486	1119	117	0	0	0	0	1	undefined	58e62ffd09e55e10009c79d9
	false	undefined	0							undefined	0	58e6323509e55e10009c7dfb		false	568029	1120	115	0	0	0	0	1	undefined	58e62ffd09e55e10009c79d9
	false	undefined	0							undefined	0	58e6323509e55e10009c7dfc		true	568625	1121	117	0	0	0	0	1	undefined	58e62ffd09e55e10009c79d9
	false	undefined	0							undefined	0	58e6323609e55e10009c7dfd		true	569155	1122	120	0	0	0	0	1	undefined	58e62ffd09e55e10009c79d9
	false	undefined	0							undefined	0	58e6323609e55e10009c7dfe		true	569638	1123	-1	0	0	0	0	1	undefined	58e62ffd09e55e10009c79d9
	false	undefined	0							undefined	0	58e6323709e55e10009c7dff		true	570228	1124	-1	0	0	0	0	1	undefined	58e62ffd09e55e10009c79d9
	false	undefined	0							undefined	0	58e6323809e55e10009c7e00		true	570826	1125	-1	0	0	0	0	1	undefined	58e62ffd09e55e10009c79d9
	false	undefined	0							undefined	0	58e6323809e55e10009c7e01		true	571374	1129	-1	0	0	0	0	1	undefined	58e62ffd09e55e10009c79d9
	false	undefined	0							undefined	0	58e6323909e55e10009c7e02		true	571973	1130	-1	0	0	0	0	1	undefined	58e62ffd09e55e10009c79d9
	false	undefined	0							undefined	0	58e6323909e55e10009c7e03		true	572450	1131	-1	0	0	0	0	1	undefined	58e62ffd09e55e10009c79d9
	false	undefined	0							undefined	0	58e6323a09e55e10009c7e04		true	573036	1132	-1	0	0	0	0	1	undefined	58e62ffd09e55e10009c79d9
	false	undefined	0							undefined	0	58e6323a09e55e10009c7e05		true	573557	1133	0	0	0	0	0	1	undefined	58e62ffd09e55e10009c79d9
	false	undefined	0							undefined	0	58e6323b09e55e10009c7e06		true	574099	1134	0	0	0	0	0	1	undefined	58e62ffd09e55e10009c79d9
	false	undefined	0							undefined	0	58e6323b09e55e10009c7e07		true	574705	1135	-1	0	0	0	0	1	undefined	58e62ffd09e55e10009c79d9
	false	undefined	0							undefined	0	58e6323c09e55e10009c7e08		true	575234	1136	-1	0	0	0	0	1	undefined	58e62ffd09e55e10009c79d9
	false	undefined	0							undefined	0	58e6323d09e55e10009c7e09		true	575770	1137	-1	0	0	0	0	1	undefined	58e62ffd09e55e10009c79d9
	false	undefined	0							undefined	0	58e6323d09e55e10009c7e0a		true	576382	1138	-1	0	0	0	0	1	undefined	58e62ffd09e55e10009c79d9
	false	undefined	0							undefined	0	58e6323e09e55e10009c7e0b		true	576899	1139	-1	0	0	0	0	1	undefined	58e62ffd09e55e10009c79d9
	false	undefined	0							undefined	0	58e6323e09e55e10009c7e0c		true	577445	1140	-1	0	0	0	0	1	undefined	58e62ffd09e55e10009c79d9
	false	undefined	0							undefined	0	58e6323f09e55e10009c7e0d		true	578050	1141	-1	0	0	0	0	1	undefined	58e62ffd09e55e10009c79d9
	false	undefined	0							undefined	0	58e6323f09e55e10009c7e0e		true	578651	1142	-1	0	0	0	0	1	undefined	58e62ffd09e55e10009c79d9
	false	undefined	0							undefined	0	58e6324009e55e10009c7e0f		true	579139	1143	-1	0	0	0	0	1	undefined	58e62ffd09e55e10009c79d9
	false	undefined	0							undefined	0	58e6324009e55e10009c7e10		true	579642	1144	-1	0	0	0	0	1	undefined	58e62ffd09e55e10009c79d9
	false	undefined	0							undefined	0	58e6324109e55e10009c7e12		true	580268	1145	-1	0	0	0	0	1	undefined	58e62ffd09e55e10009c79d9
[truncated: 34 more columns]
