# Supplementary material for: Real-Time Chest Compression Quality Measurements by Smartphone Camera
Source: J Healthc Eng. 2018 Oct 28;2018:6241856. doi: 10.1155/2018/6241856 (PMC6277120; doi:10.1155/2018/6241856)
Supplement: Supplementary Materials — The supplementary material consists data files for each of the five presented experiments. For the first four experiments, the data are presented for each test person as Matlab mat-files containing both the compared reference data and the detection data. For the fifth test, CPR summary report test, the data is presented as ssx-files (reference data) and xls-files (detection data). A readme-file explaining the preprocessing performed prior to the comparison between reference data and detection data is here also included. [file 6241856.f1.zip › 6241856.f1/Data files/Test 5. CPR summary report/TestData/TP4/TP4.xls]

## Sheet: jarle
$__	isNew	errors	_maxListeners	_doc	_pres	_posts	save	db	collection	discriminators	__v	id	_id	scepticalToFrequency	mse	sequence	rate	pp2pt	p2et	s2pt	rd	pd	edt	sid	schema	$__delta	$__version	increment	$__where	remove	model	$__buildDoc	init	$__storeShard	hook	pre	post	removePre	_lazySetupHooks	update	set	$__shouldModify	$__set	getValue	setValue	get	$__path	markModified	$__try
	false	undefined	0							undefined	0	58e3992b5ba4cb100097f7d1		true	597	0	0	0	0	0	0	1	undefined	58e3992a5ba4cb100097f7d0
	false	undefined	0							undefined	0	58e3992b5ba4cb100097f7d2		true	1312	1	0	0	0	0	0	1	undefined	58e3992a5ba4cb100097f7d0
	false	undefined	0							undefined	0	58e3992c5ba4cb100097f7d3		true	1856	2	0	0	0	0	0	1	undefined	58e3992a5ba4cb100097f7d0
	false	undefined	0							undefined	0	58e3992c5ba4cb100097f7d4		true	2381	3	0	0	0	0	0	1	undefined	58e3992a5ba4cb100097f7d0
	false	undefined	0							undefined	0	58e3992d5ba4cb100097f7d5		true	2924	4	0	0	0	0	0	1	undefined	58e3992a5ba4cb100097f7d0
	false	undefined	0							undefined	0	58e3992d5ba4cb100097f7d6		true	3520	5	-1	0	0	0	0	1	undefined	58e3992a5ba4cb100097f7d0
	false	undefined	0							undefined	0	58e3992e5ba4cb100097f7d7		true	4062	6	-1	0	0	0	0	1	undefined	58e3992a5ba4cb100097f7d0
	false	undefined	0							undefined	0	58e3992f5ba4cb100097f7d8		true	4661	7	-1	0	0	0	0	1	undefined	58e3992a5ba4cb100097f7d0
	false	undefined	0							undefined	0	58e3992f5ba4cb100097f7d9		true	5258	8	-1	0	0	0	0	1	undefined	58e3992a5ba4cb100097f7d0
	false	undefined	0							undefined	0	58e399305ba4cb100097f7da		true	5789	9	-1	0	0	0	0	1	undefined	58e3992a5ba4cb100097f7d0
	false	undefined	0							undefined	0	58e399305ba4cb100097f7db		false	6330	13	62	0	0	0	0	1	undefined	58e3992a5ba4cb100097f7d0
	false	undefined	0							undefined	0	58e399315ba4cb100097f7dc		false	6984	14	-1	0	0	0	0	1	undefined	58e3992a5ba4cb100097f7d0
	false	undefined	0							undefined	0	58e399315ba4cb100097f7dd		false	7520	15	-1	0	0	0	0	1	undefined	58e3992a5ba4cb100097f7d0
	false	undefined	0							undefined	0	58e399325ba4cb100097f7de		false	8053	16	-1	0	0	0	0	1	undefined	58e3992a5ba4cb100097f7d0
	false	undefined	0							undefined	0	58e399335ba4cb100097f7df		false	8591	17	-1	0	0	0	0	1	undefined	58e3992a5ba4cb100097f7d0
	false	undefined	0							undefined	0	58e399335ba4cb100097f7e0		false	9211	18	-1	0	0	0	0	1	undefined	58e3992a5ba4cb100097f7d0
	false	undefined	0							undefined	0	58e399345ba4cb100097f7e1		true	9722	19	-1	0	0	0	0	1	undefined	58e3992a5ba4cb100097f7d0
	false	undefined	0							undefined	0	58e399345ba4cb100097f7e2		true	10270	20	-1	0	0	0	0	1	undefined	58e3992a5ba4cb100097f7d0
	false	undefined	0							undefined	0	58e399355ba4cb100097f7e3		true	10766	21	-1	0	0	0	0	1	undefined	58e3992a5ba4cb100097f7d0
	false	undefined	0							undefined	0	58e399355ba4cb100097f7e4		true	11337	22	-1	0	0	0	0	1	undefined	58e3992a5ba4cb100097f7d0
	false	undefined	0							undefined	0	58e399365ba4cb100097f7e5		true	11866	23	-1	0	0	0	0	1	undefined	58e3992a5ba4cb100097f7d0
	false	undefined	0							undefined	0	58e399365ba4cb100097f7e6		false	12403	24	-1	0	0	0	0	1	undefined	58e3992a5ba4cb100097f7d0
	false	undefined	0							undefined	0	58e399375ba4cb100097f7e7		false	12941	25	-1	0	0	0	0	1	undefined	58e3992a5ba4cb100097f7d0
	false	undefined	0							undefined	0	58e399375ba4cb100097f7e8		false	13472	26	-1	0	0	0	0	1	undefined	58e3992a5ba4cb100097f7d0
	false	undefined	0							undefined	0	58e399385ba4cb100097f7e9		false	13934	27	-1	0	0	0	0	1	undefined	58e3992a5ba4cb100097f7d0
	false	undefined	0							undefined	0	58e399385ba4cb100097f7ea		true	14561	28	-1	0	0	0	0	1	undefined	58e3992a5ba4cb100097f7d0
	false	undefined	0							undefined	0	58e399395ba4cb100097f7eb		true	15079	29	-1	0	0	0	0	1	undefined	58e3992a5ba4cb100097f7d0
	false	undefined	0							undefined	0	58e399395ba4cb100097f7ec		true	15602	30	-1	0	0	0	0	1	undefined	58e3992a5ba4cb100097f7d0
	false	undefined	0							undefined	0	58e3993a5ba4cb100097f7ed		true	16150	31	-1	0	0	0	0	1	undefined	58e3992a5ba4cb100097f7d0
	false	undefined	0							undefined	0	58e3993b5ba4cb100097f7ee		true	16658	32	-1	0	0	0	0	1	undefined	58e3992a5ba4cb100097f7d0
	false	undefined	0							undefined	0	58e3993b5ba4cb100097f7ef		true	17225	33	-1	0	0	0	0	1	undefined	58e3992a5ba4cb100097f7d0
	false	undefined	0							undefined	0	58e3993c5ba4cb100097f7f0		true	17750	34	-1	0	0	0	0	1	undefined	58e3992a5ba4cb100097f7d0
	false	undefined	0							undefined	0	58e3993c5ba4cb100097f7f1		true	18288	35	-1	0	0	0	0	1	undefined	58e3992a5ba4cb100097f7d0
	false	undefined	0							undefined	0	58e3993d5ba4cb100097f7f2		true	18758	36	-1	0	0	0	0	1	undefined	58e3992a5ba4cb100097f7d0
	false	undefined	0							undefined	0	58e3993d5ba4cb100097f7f3		false	19383	37	-1	0	0	0	0	1	undefined	58e3992a5ba4cb100097f7d0
	false	undefined	0							undefined	0	58e3993e5ba4cb100097f7f4		false	19952	38	-1	0	0	0	0	1	undefined	58e3992a5ba4cb100097f7d0
	false	undefined	0							undefined	0	58e3993e5ba4cb100097f7f5		false	20480	39	-1	0	0	0	0	1	undefined	58e3992a5ba4cb100097f7d0
	false	undefined	0							undefined	0	58e3993f5ba4cb100097f7f6		false	21020	40	-1	0	0	0	0	1	undefined	58e3992a5ba4cb100097f7d0
	false	undefined	0							undefined	0	58e3993f5ba4cb100097f7f7		false	21569	41	-1	0	0	0	0	1	undefined	58e3992a5ba4cb100097f7d0
	false	undefined	0							undefined	0	58e399405ba4cb100097f7f8		false	22173	42	40	0	0	0	0	1	undefined	58e3992a5ba4cb100097f7d0
	false	undefined	0							undefined	0	58e399415ba4cb100097f7f9		true	22690	43	46	0	0	0	0	1	undefined	58e3992a5ba4cb100097f7d0
	false	undefined	0							undefined	0	58e399415ba4cb100097f7fa		true	23145	44	36	0	0	0	0	1	undefined	58e3992a5ba4cb100097f7d0
	false	undefined	0							undefined	0	58e399425ba4cb100097f7fb		false	23688	48	38	0	0	0	0	1	undefined	58e3992a5ba4cb100097f7d0
	false	undefined	0							undefined	0	58e399425ba4cb100097f7fc		false	24227	49	49	0	0	0	0	1	undefined	58e3992a5ba4cb100097f7d0
	false	undefined	0							undefined	0	58e399435ba4cb100097f7fd		false	24826	50	55	0	0	0	0	1	undefined	58e3992a5ba4cb100097f7d0
	false	undefined	0							undefined	0	58e399435ba4cb100097f7fe		false	25313	51	54	0	0	0	0	1	undefined	58e3992a5ba4cb100097f7d0
	false	undefined	0							undefined	0	58e399445ba4cb100097f7ff		false	25832	52	43	0	0	0	0	1	undefined	58e3992a5ba4cb100097f7d0
	false	undefined	0							undefined	0	58e399445ba4cb100097f800		false	26370	53	37	0	0	0	0	1	undefined	58e3992a5ba4cb100097f7d0
	false	undefined	0							undefined	0	58e399455ba4cb100097f801		false	26899	63	40	0	0	0	0	1	undefined	58e3992a5ba4cb100097f7d0
	false	undefined	0							undefined	0	58e399455ba4cb100097f802		false	27433	64	41	0	0	0	0	1	undefined	58e3992a5ba4cb100097f7d0
	false	undefined	0							undefined	0	58e399465ba4cb100097f803		true	27959	65	41	0	0	0	0	1	undefined	58e3992a5ba4cb100097f7d0
	false	undefined	0							undefined	0	58e399465ba4cb100097f804		false	28514	66	131	0	0	0	0	1	undefined	58e3992a5ba4cb100097f7d0
	false	undefined	0							undefined	0	58e399475ba4cb100097f805		false	28961	67	129	0	0	0	0	1	undefined	58e3992a5ba4cb100097f7d0
	false	undefined	0							undefined	0	58e399475ba4cb100097f806		false	29498	68	129	0	0	0	0	1	undefined	58e3992a5ba4cb100097f7d0
	false	undefined	0							undefined	0	58e399485ba4cb100097f807		false	30055	69	132	0	0	0	0	1	undefined	58e3992a5ba4cb100097f7d0
	false	undefined	0							undefined	0	58e399485ba4cb100097f808		false	30539	70	133	0	0	0	0	1	undefined	58e3992a5ba4cb100097f7d0
	false	undefined	0							undefined	0	58e399495ba4cb100097f809		false	31107	71	130	0	0	0	0	1	undefined	58e3992a5ba4cb100097f7d0
	false	undefined	0							undefined	0	58e3994a5ba4cb100097f80a		false	31709	72	129	0	0	0	0	1	undefined	58e3992a5ba4cb100097f7d0
	false	undefined	0							undefined	0	58e3994a5ba4cb100097f80b		false	32224	73	130	0	0	0	0	1	undefined	58e3992a5ba4cb100097f7d0
	false	undefined	0							undefined	0	58e3994b5ba4cb100097f80c		false	32726	74	128	0	0	0	0	1	undefined	58e3992a5ba4cb100097f7d0
	false	undefined	0							undefined	0	58e3994b5ba4cb100097f80d		false	33296	75	125	0	0	0	0	1	undefined	58e3992a5ba4cb100097f7d0
	false	undefined	0							undefined	0	58e3994c5ba4cb100097f80e		false	33863	76	121	0	0	0	0	1	undefined	58e3992a5ba4cb100097f7d0
	false	undefined	0							undefined	0	58e3994c5ba4cb100097f80f		false	34305	77	119	0	0	0	0	1	undefined	58e3992a5ba4cb100097f7d0
	false	undefined	0							undefined	0	58e3994d5ba4cb100097f810		false	34928	78	117	0	0	0	0	1	undefined	58e3992a5ba4cb100097f7d0
	false	undefined	0							undefined	0	58e3994d5ba4cb100097f811		false	35437	79	116	0	0	0	0	1	undefined	58e3992a5ba4cb100097f7d0
	false	undefined	0							undefined	0	58e3994e5ba4cb100097f812		false	35931	80	117	0	0	0	0	1	undefined	58e3992a5ba4cb100097f7d0
	false	undefined	0							undefined	0	58e3994e5ba4cb100097f813		false	36517	81	116	0	0	0	0	1	undefined	58e3992a5ba4cb100097f7d0
	false	undefined	0							undefined	0	58e3994f5ba4cb100097f814		false	37067	82	117	0	0	0	0	1	undefined	58e3992a5ba4cb100097f7d0
	false	undefined	0							undefined	0	58e3994f5ba4cb100097f815		false	37587	83	119	0	0	0	0	1	undefined	58e3992a5ba4cb100097f7d0
	false	undefined	0							undefined	0	58e399505ba4cb100097f816		false	38123	84	119	0	0	0	0	1	undefined	58e3992a5ba4cb100097f7d0
	false	undefined	0							undefined	0	58e399505ba4cb100097f817		false	38603	85	118	0	0	0	0	1	undefined	58e3992a5ba4cb100097f7d0
	false	undefined	0							undefined	0	58e399515ba4cb100097f818		false	39198	86	117	0	0	0	0	1	undefined	58e3992a5ba4cb100097f7d0
	false	undefined	0							undefined	0	58e399525ba4cb100097f819		false	39732	87	118	0	0	0	0	1	undefined	58e3992a5ba4cb100097f7d0
	false	undefined	0							undefined	0	58e399525ba4cb100097f81a		false	40256	88	119	0	0	0	0	1	undefined	58e3992a5ba4cb100097f7d0
	false	undefined	0							undefined	0	58e399535ba4cb100097f81b		false	40797	89	120	0	0	0	0	1	undefined	58e3992a5ba4cb100097f7d0
	false	undefined	0							undefined	0	58e399535ba4cb100097f81c		false	41278	90	116	0	0	0	0	1	undefined	58e3992a5ba4cb100097f7d0
	false	undefined	0							undefined	0	58e399545ba4cb100097f81d		false	41874	91	118	0	0	0	0	1	undefined	58e3992a5ba4cb100097f7d0
	false	undefined	0							undefined	0	58e399545ba4cb100097f81e		false	42395	92	120	0	0	0	0	1	undefined	58e3992a5ba4cb100097f7d0
	false	undefined	0							undefined	0	58e399555ba4cb100097f81f		false	42921	93	121	0	0	0	0	1	undefined	58e3992a5ba4cb100097f7d0
	false	undefined	0							undefined	0	58e399555ba4cb100097f820		false	43481	94	121	0	0	0	0	1	undefined	58e3992a5ba4cb100097f7d0
	false	undefined	0							undefined	0	58e399565ba4cb100097f821		false	44007	95	121	0	0	0	0	1	undefined	58e3992a5ba4cb100097f7d0
	false	undefined	0							undefined	0	58e399565ba4cb100097f822		false	44530	96	123	0	0	0	0	1	undefined	58e3992a5ba4cb100097f7d0
	false	undefined	0							undefined	0	58e399575ba4cb100097f823		false	45026	97	122	0	0	0	0	1	undefined	58e3992a5ba4cb100097f7d0
	false	undefined	0							undefined	0	58e399575ba4cb100097f824		false	45608	98	120	0	0	0	0	1	undefined	58e3992a5ba4cb100097f7d0
	false	undefined	0							undefined	0	58e399585ba4cb100097f825		false	46138	99	119	0	0	0	0	1	undefined	58e3992a5ba4cb100097f7d0
	false	undefined	0							undefined	0	58e399595ba4cb100097f826		false	46740	100	119	0	0	0	0	1	undefined	58e3992a5ba4cb100097f7d0
	false	undefined	0							undefined	0	58e399595ba4cb100097f827		false	47259	101	121	0	0	0	0	1	undefined	58e3992a5ba4cb100097f7d0
	false	undefined	0							undefined	0	58e3995a5ba4cb100097f828		false	47752	102	121	0	0	0	0	1	undefined	58e3992a5ba4cb100097f7d0
	false	undefined	0							undefined	0	58e3995a5ba4cb100097f829		false	48268	103	121	0	0	0	0	1	undefined	58e3992a5ba4cb100097f7d0
	false	undefined	0							undefined	0	58e3995b5ba4cb100097f82a		false	48886	104	121	0	0	0	0	1	undefined	58e3992a5ba4cb100097f7d0
	false	undefined	0							undefined	0	58e3995b5ba4cb100097f82b		false	49431	105	119	0	0	0	0	1	undefined	58e3992a5ba4cb100097f7d0
	false	undefined	0							undefined	0	58e3995c5ba4cb100097f82c		false	49960	106	117	0	0	0	0	1	undefined	58e3992a5ba4cb100097f7d0
	false	undefined	0							undefined	0	58e3995c5ba4cb100097f82d		false	50482	107	114	0	0	0	0	1	undefined	58e3992a5ba4cb100097f7d0
	false	undefined	0							undefined	0	58e3995d5ba4cb100097f82e		false	51018	108	117	0	0	0	0	1	undefined	58e3992a5ba4cb100097f7d0
	false	undefined	0							undefined	0	58e3995d5ba4cb100097f82f		false	51541	109	117	0	0	0	0	1	undefined	58e3992a5ba4cb100097f7d0
	false	undefined	0							undefined	0	58e3995e5ba4cb100097f830		false	52078	110	116	0	0	0	0	1	undefined	58e3992a5ba4cb100097f7d0
	false	undefined	0							undefined	0	58e3995e5ba4cb100097f831		false	52621	111	115	0	0	0	0	1	undefined	58e3992a5ba4cb100097f7d0
	false	undefined	0							undefined	0	58e3995f5ba4cb100097f832		false	53161	112	113	0	0	0	0	1	undefined	58e3992a5ba4cb100097f7d0
	false	undefined	0							undefined	0	58e399605ba4cb100097f833		false	53698	113	115	0	0	0	0	1	undefined	58e3992a5ba4cb100097f7d0
	false	undefined	0							undefined	0	58e399605ba4cb100097f834		false	54152	114	114	0	0	0	0	1	undefined	58e3992a5ba4cb100097f7d0
	false	undefined	0							undefined	0	58e399615ba4cb100097f835		false	54770	115	115	0	0	0	0	1	undefined	58e3992a5ba4cb100097f7d0
	false	undefined	0							undefined	0	58e399615ba4cb100097f836		false	55359	116	115	0	0	0	0	1	undefined	58e3992a5ba4cb100097f7d0
	false	undefined	0							undefined	0	58e399625ba4cb100097f837		false	55900	117	112	0	0	0	0	1	undefined	58e3992a5ba4cb100097f7d0
	false	undefined	0							undefined	0	58e399625ba4cb100097f838		false	56485	118	113	0	0	0	0	1	undefined	58e3992a5ba4cb100097f7d0
	false	undefined	0							undefined	0	58e399635ba4cb100097f839		false	57043	119	113	0	0	0	0	1	undefined	58e3992a5ba4cb100097f7d0
	false	undefined	0							undefined	0	58e399635ba4cb100097f83a		false	57511	120	115	0	0	0	0	1	undefined	58e3992a5ba4cb100097f7d0
	false	undefined	0							undefined	0	58e399645ba4cb100097f83b		false	58083	121	115	0	0	0	0	1	undefined	58e3992a5ba4cb100097f7d0
	false	undefined	0							undefined	0	58e399655ba4cb100097f83c		false	58632	122	115	0	0	0	0	1	undefined	58e3992a5ba4cb100097f7d0
	false	undefined	0							undefined	0	58e399655ba4cb100097f83d		false	59159	123	118	0	0	0	0	1	undefined	58e3992a5ba4cb100097f7d0
	false	undefined	0							undefined	0	58e399655ba4cb100097f83e		false	59624	124	116	0	0	0	0	1	undefined	58e3992a5ba4cb100097f7d0
	false	undefined	0							undefined	0	58e399665ba4cb100097f83f		false	60238	125	116	0	0	0	0	1	undefined	58e3992a5ba4cb100097f7d0
	false	undefined	0							undefined	0	58e399675ba4cb100097f840		false	60768	126	113	0	0	0	0	1	undefined	58e3992a5ba4cb100097f7d0
	false	undefined	0							undefined	0	58e399675ba4cb100097f841		false	61372	127	114	0	0	0	0	1	undefined	58e3992a5ba4cb100097f7d0
	false	undefined	0							undefined	0	58e399685ba4cb100097f842		false	61907	128	115	0	0	0	0	1	undefined	58e3992a5ba4cb100097f7d0
	false	undefined	0							undefined	0	58e399685ba4cb100097f843		false	62389	129	112	0	0	0	0	1	undefined	58e3992a5ba4cb100097f7d0
	false	undefined	0							undefined	0	58e399695ba4cb100097f844		false	62978	130	114	0	0	0	0	1	undefined	58e3992a5ba4cb100097f7d0
	false	undefined	0							undefined	0	58e399695ba4cb100097f845		false	63506	131	113	0	0	0	0	1	undefined	58e3992a5ba4cb100097f7d0
	false	undefined	0							undefined	0	58e3996a5ba4cb100097f846		false	63962	132	113	0	0	0	0	1	undefined	58e3992a5ba4cb100097f7d0
	false	undefined	0							undefined	0	58e3996a5ba4cb100097f847		false	64481	133	114	0	0	0	0	1	undefined	58e3992a5ba4cb100097f7d0
	false	undefined	0							undefined	0	58e3996b5ba4cb100097f848		false	65043	134	116	0	0	0	0	1	undefined	58e3992a5ba4cb100097f7d0
	false	undefined	0							undefined	0	58e3996b5ba4cb100097f849		false	65581	135	118	0	0	0	0	1	undefined	58e3992a5ba4cb100097f7d0
	false	undefined	0							undefined	0	58e3996c5ba4cb100097f84a		false	66090	136	118	0	0	0	0	1	undefined	58e3992a5ba4cb100097f7d0
	false	undefined	0							undefined	0	58e3996c5ba4cb100097f84b		false	66566	137	115	0	0	0	0	1	undefined	58e3992a5ba4cb100097f7d0
	false	undefined	0							undefined	0	58e3996d5ba4cb100097f84c		false	67123	138	116	0	0	0	0	1	undefined	58e3992a5ba4cb100097f7d0
	false	undefined	0							undefined	0	58e3996d5ba4cb100097f84d		false	67642	139	116	0	0	0	0	1	undefined	58e3992a5ba4cb100097f7d0
	false	undefined	0							undefined	0	58e3996e5ba4cb100097f84e		false	68180	140	115	0	0	0	0	1	undefined	58e3992a5ba4cb100097f7d0
	false	undefined	0							undefined	0	58e3996f5ba4cb100097f84f		false	68797	141	114	0	0	0	0	1	undefined	58e3992a5ba4cb100097f7d0
	false	undefined	0							undefined	0	58e3996f5ba4cb100097f850		false	69317	142	114	0	0	0	0	1	undefined	58e3992a5ba4cb100097f7d0
	false	undefined	0							undefined	0	58e399705ba4cb100097f851		false	69857	143	116	0	0	0	0	1	undefined	58e3992a5ba4cb100097f7d0
	false	undefined	0							undefined	0	58e399705ba4cb100097f852		false	70398	144	117	0	0	0	0	1	undefined	58e3992a5ba4cb100097f7d0
	false	undefined	0							undefined	0	58e399715ba4cb100097f853		false	70916	145	114	0	0	0	0	1	undefined	58e3992a5ba4cb100097f7d0
	false	undefined	0							undefined	0	58e399715ba4cb100097f854		false	71536	146	114	0	0	0	0	1	undefined	58e3992a5ba4cb100097f7d0
	false	undefined	0							undefined	0	58e399725ba4cb100097f855		false	72061	147	115	0	0	0	0	1	undefined	58e3992a5ba4cb100097f7d0
	false	undefined	0							undefined	0	58e399725ba4cb100097f856		false	72547	148	113	0	0	0	0	1	undefined	58e3992a5ba4cb100097f7d0
	false	undefined	0							undefined	0	58e399735ba4cb100097f857		false	73132	149	114	0	0	0	0	1	undefined	58e3992a5ba4cb100097f7d0
	false	undefined	0							undefined	0	58e399735ba4cb100097f858		false	73610	150	115	0	0	0	0	1	undefined	58e3992a5ba4cb100097f7d0
	false	undefined	0							undefined	0	58e399745ba4cb100097f859		false	74136	151	114	0	0	0	0	1	undefined	58e3992a5ba4cb100097f7d0
	false	undefined	0							undefined	0	58e399755ba4cb100097f85a		false	74659	152	113	0	0	0	0	1	undefined	58e3992a5ba4cb100097f7d0
	false	undefined	0							undefined	0	58e399755ba4cb100097f85b		false	75198	153	112	0	0	0	0	1	undefined	58e3992a5ba4cb100097f7d0
	false	undefined	0							undefined	0	58e399765ba4cb100097f85c		false	75728	154	114	0	0	0	0	1	undefined	58e3992a5ba4cb100097f7d0
	false	undefined	0							undefined	0	58e399765ba4cb100097f85d		false	76270	155	112	0	0	0	0	1	undefined	58e3992a5ba4cb100097f7d0
	false	undefined	0							undefined	0	58e399775ba4cb100097f85e		false	76779	156	113	0	0	0	0	1	undefined	58e3992a5ba4cb100097f7d0
	false	undefined	0							undefined	0	58e399775ba4cb100097f85f		false	77338	157	117	0	0	0	0	1	undefined	58e3992a5ba4cb100097f7d0
	false	undefined	0							undefined	0	58e399785ba4cb100097f860		false	77801	158	118	0	0	0	0	1	undefined	58e3992a5ba4cb100097f7d0
	false	undefined	0							undefined	0	58e399785ba4cb100097f861		false	78411	159	121	0	0	0	0	1	undefined	58e3992a5ba4cb100097f7d0
	false	undefined	0							undefined	0	58e399795ba4cb100097f862		false	78846	160	119	0	0	0	0	1	undefined	58e3992a5ba4cb100097f7d0
	false	undefined	0							undefined	0	58e399795ba4cb100097f863		false	79545	161	119	0	0	0	0	1	undefined	58e3992a5ba4cb100097f7d0
	false	undefined	0							undefined	0	58e3997a5ba4cb100097f864		false	80087	162	118	0	0	0	0	1	undefined	58e3992a5ba4cb100097f7d0
	false	undefined	0							undefined	0	58e3997a5ba4cb100097f865		false	80587	163	117	0	0	0	0	1	undefined	58e3992a5ba4cb100097f7d0
	false	undefined	0							undefined	0	58e3997b5ba4cb100097f866		false	81142	164	118	0	0	0	0	1	undefined	58e3992a5ba4cb100097f7d0
	false	undefined	0							undefined	0	58e3997b5ba4cb100097f867		false	81610	165	114	0	0	0	0	1	undefined	58e3992a5ba4cb100097f7d0
	false	undefined	0							undefined	0	58e3997c5ba4cb100097f868		false	82215	166	117	0	0	0	0	1	undefined	58e3992a5ba4cb100097f7d0
	false	undefined	0							undefined	0	58e3997d5ba4cb100097f869		false	82732	167	117	0	0	0	0	1	undefined	58e3992a5ba4cb100097f7d0
	false	undefined	0							undefined	0	58e3997d5ba4cb100097f86a		false	83260	168	116	0	0	0	0	1	undefined	58e3992a5ba4cb100097f7d0
	false	undefined	0							undefined	0	58e3997e5ba4cb100097f86b		false	83811	169	117	0	0	0	0	1	undefined	58e3992a5ba4cb100097f7d0
	false	undefined	0							undefined	0	58e3997e5ba4cb100097f86c		false	84275	170	115	0	0	0	0	1	undefined	58e3992a5ba4cb100097f7d0
	false	undefined	0							undefined	0	58e3997f5ba4cb100097f86d		false	84815	171	119	0	0	0	0	1	undefined	58e3992a5ba4cb100097f7d0
	false	undefined	0							undefined	0	58e3997f5ba4cb100097f86e		false	85361	172	117	0	0	0	0	1	undefined	58e3992a5ba4cb100097f7d0
	false	undefined	0							undefined	0	58e399805ba4cb100097f86f		false	85811	173	113	0	0	0	0	1	undefined	58e3992a5ba4cb100097f7d0
	false	undefined	0							undefined	0	58e399805ba4cb100097f870		false	86338	174	113	0	0	0	0	1	undefined	58e3992a5ba4cb100097f7d0
	false	undefined	0							undefined	0	58e399815ba4cb100097f871		false	86880	175	110	0	0	0	0	1	undefined	58e3992a5ba4cb100097f7d0
	false	undefined	0							undefined	0	58e399815ba4cb100097f872		false	87488	176	113	0	0	0	0	1	undefined	58e3992a5ba4cb100097f7d0
	false	undefined	0							undefined	0	58e399825ba4cb100097f873		false	88017	177	115	0	0	0	0	1	undefined	58e3992a5ba4cb100097f7d0
	false	undefined	0							undefined	0	58e399825ba4cb100097f874		false	88490	178	113	0	0	0	0	1	undefined	58e3992a5ba4cb100097f7d0
	false	undefined	0							undefined	0	58e399835ba4cb100097f875		false	89017	179	113	0	0	0	0	1	undefined	58e3992a5ba4cb100097f7d0
	false	undefined	0							undefined	0	58e399835ba4cb100097f876		false	89570	180	110	0	0	0	0	1	undefined	58e3992a5ba4cb100097f7d0
	false	undefined	0							undefined	0	58e399845ba4cb100097f877		false	90096	181	109	0	0	0	0	1	undefined	58e3992a5ba4cb100097f7d0
	false	undefined	0							undefined	0	58e399855ba4cb100097f878		false	90680	182	113	0	0	0	0	1	undefined	58e3992a5ba4cb100097f7d0
	false	undefined	0							undefined	0	58e399855ba4cb100097f879		false	91236	183	113	0	0	0	0	1	undefined	58e3992a5ba4cb100097f7d0
	false	undefined	0							undefined	0	58e399865ba4cb100097f87a		false	91830	184	116	0	0	0	0	1	undefined	58e3992a5ba4cb100097f7d0
	false	undefined	0							undefined	0	58e399865ba4cb100097f87b		false	92360	185	116	0	0	0	0	1	undefined	58e3992a5ba4cb100097f7d0
	false	undefined	0							undefined	0	58e399875ba4cb100097f87c		false	92985	186	115	0	0	0	0	1	undefined	58e3992a5ba4cb100097f7d0
	false	undefined	0							undefined	0	58e399875ba4cb100097f87d		false	93497	187	118	0	0	0	0	1	undefined	58e3992a5ba4cb100097f7d0
	false	undefined	0							undefined	0	58e399885ba4cb100097f87e		false	94051	188	116	0	0	0	0	1	undefined	58e3992a5ba4cb100097f7d0
	false	undefined	0							undefined	0	58e399885ba4cb100097f87f		false	94561	189	117	0	0	0	0	1	undefined	58e3992a5ba4cb100097f7d0
	false	undefined	0							undefined	0	58e399895ba4cb100097f880		false	95095	190	116	0	0	0	0	1	undefined	58e3992a5ba4cb100097f7d0
	false	undefined	0							undefined	0	58e3998a5ba4cb100097f881		false	95647	191	115	0	0	0	0	1	undefined	58e3992a5ba4cb100097f7d0
	false	undefined	0							undefined	0	58e3998a5ba4cb100097f882		false	96243	192	116	0	0	0	0	1	undefined	58e3992a5ba4cb100097f7d0
	false	undefined	0							undefined	0	58e3998b5ba4cb100097f883		false	96838	193	115	0	0	0	0	1	undefined	58e3992a5ba4cb100097f7d0
	false	undefined	0							undefined	0	58e3998b5ba4cb100097f884		false	97359	194	115	0	0	0	0	1	undefined	58e3992a5ba4cb100097f7d0
	false	undefined	0							undefined	0	58e3998c5ba4cb100097f885		false	97917	195	117	0	0	0	0	1	undefined	58e3992a5ba4cb100097f7d0
	false	undefined	0							undefined	0	58e3998c5ba4cb100097f886		false	98454	196	116	0	0	0	0	1	undefined	58e3992a5ba4cb100097f7d0
	false	undefined	0							undefined	0	58e3998d5ba4cb100097f887		false	98968	197	118	0	0	0	0	1	undefined	58e3992a5ba4cb100097f7d0
	false	undefined	0							undefined	0	58e3998d5ba4cb100097f888		false	99507	198	116	0	0	0	0	1	undefined	58e3992a5ba4cb100097f7d0
	false	undefined	0							undefined	0	58e3998e5ba4cb100097f889		false	100055	199	116	0	0	0	0	1	undefined	58e3992a5ba4cb100097f7d0
	false	undefined	0							undefined	0	58e3998e5ba4cb100097f88a		false	100531	200	117	0	0	0	0	1	undefined	58e3992a5ba4cb100097f7d0
	false	undefined	0							undefined	0	58e3998f5ba4cb100097f88b		false	101102	201	116	0	0	0	0	1	undefined	58e3992a5ba4cb100097f7d0
	false	undefined	0							undefined	0	58e399905ba4cb100097f88c		false	101715	202	120	0	0	0	0	1	undefined	58e3992a5ba4cb100097f7d0
	false	undefined	0							undefined	0	58e399905ba4cb100097f88d		false	102246	203	118	0	0	0	0	1	undefined	58e3992a5ba4cb100097f7d0
	false	undefined	0							undefined	0	58e399915ba4cb100097f88e		false	102789	204	117	0	0	0	0	1	undefined	58e3992a5ba4cb100097f7d0
	false	undefined	0							undefined	0	58e399915ba4cb100097f88f		false	103396	205	116	0	0	0	0	1	undefined	58e3992a5ba4cb100097f7d0
	false	undefined	0							undefined	0	58e399925ba4cb100097f890		false	103917	206	114	0	0	0	0	1	undefined	58e3992a5ba4cb100097f7d0
	false	undefined	0							undefined	0	58e399925ba4cb100097f891		false	104526	207	117	0	0	0	0	1	undefined	58e3992a5ba4cb100097f7d0
	false	undefined	0							undefined	0	58e399935ba4cb100097f892		false	105060	208	112	0	0	0	0	1	undefined	58e3992a5ba4cb100097f7d0
	false	undefined	0							undefined	0	58e399945ba4cb100097f893		false	105660	209	113	0	0	0	0	1	undefined	58e3992a5ba4cb100097f7d0
	false	undefined	0							undefined	0	58e399945ba4cb100097f894		false	106196	210	113	0	0	0	0	1	undefined	58e3992a5ba4cb100097f7d0
	false	undefined	0							undefined	0	58e399955ba4cb100097f895		false	106733	211	114	0	0	0	0	1	undefined	58e3992a5ba4cb100097f7d0
	false	undefined	0							undefined	0	58e399955ba4cb100097f896		false	107204	212	113	0	0	0	0	1	undefined	58e3992a5ba4cb100097f7d0
	false	undefined	0							undefined	0	58e399965ba4cb100097f897		false	107802	213	113	0	0	0	0	1	undefined	58e3992a5ba4cb100097f7d0
	false	undefined	0							undefined	0	58e399965ba4cb100097f898		false	108346	214	117	0	0	0	0	1	undefined	58e3992a5ba4cb100097f7d0
	false	undefined	0							undefined	0	58e399975ba4cb100097f899		false	108849	215	119	0	0	0	0	1	undefined	58e3992a5ba4cb100097f7d0
	false	undefined	0							undefined	0	58e399975ba4cb100097f89a		false	109408	216	118	0	0	0	0	1	undefined	58e3992a5ba4cb100097f7d0
	false	undefined	0							undefined	0	58e399985ba4cb100097f89b		false	109944	217	116	0	0	0	0	1	undefined	58e3992a5ba4cb100097f7d0
	false	undefined	0							undefined	0	58e399985ba4cb100097f89c		false	110467	218	117	0	0	0	0	1	undefined	58e3992a5ba4cb100097f7d0
	false	undefined	0							undefined	0	58e399995ba4cb100097f89d		false	111061	219	115	0	0	0	0	1	undefined	58e3992a5ba4cb100097f7d0
	false	undefined	0							undefined	0	58e399995ba4cb100097f89e		false	111534	220	113	0	0	0	0	1	undefined	58e3992a5ba4cb100097f7d0
	false	undefined	0							undefined	0	58e3999a5ba4cb100097f89f		false	112077	221	115	0	0	0	0	1	undefined	58e3992a5ba4cb100097f7d0
	false	undefined	0							undefined	0	58e3999a5ba4cb100097f8a0		false	112585	222	115	0	0	0	0	1	undefined	58e3992a5ba4cb100097f7d0
	false	undefined	0							undefined	0	58e3999b5ba4cb100097f8a1		false	113128	223	117	0	0	0	0	1	undefined	58e3992a5ba4cb100097f7d0
	false	undefined	0							undefined	0	58e3999c5ba4cb100097f8a2		false	113660	224	117	0	0	0	0	1	undefined	58e3992a5ba4cb100097f7d0
	false	undefined	0							undefined	0	58e3999c5ba4cb100097f8a3		false	114153	225	115	0	0	0	0	1	undefined	58e3992a5ba4cb100097f7d0
	false	undefined	0							undefined	0	58e3999d5ba4cb100097f8a4		false	114744	226	116	0	0	0	0	1	undefined	58e3992a5ba4cb100097f7d0
	false	undefined	0							undefined	0	58e3999d5ba4cb100097f8a5		false	115228	227	115	0	0	0	0	1	undefined	58e3992a5ba4cb100097f7d0
	false	undefined	0							undefined	0	58e3999e5ba4cb100097f8a6		false	115803	228	116	0	0	0	0	1	undefined	58e3992a5ba4cb100097f7d0
	false	undefined	0							undefined	0	58e3999e5ba4cb100097f8a7		false	116290	229	116	0	0	0	0	1	undefined	58e3992a5ba4cb100097f7d0
	false	undefined	0							undefined	0	58e3999f5ba4cb100097f8a8		false	116871	230	115	0	0	0	0	1	undefined	58e3992a5ba4cb100097f7d0
	false	undefined	0							undefined	0	58e3999f5ba4cb100097f8a9		false	117409	231	116	0	0	0	0	1	undefined	58e3992a5ba4cb100097f7d0
	false	undefined	0							undefined	0	58e399a05ba4cb100097f8aa		false	117947	232	115	0	0	0	0	1	undefined	58e3992a5ba4cb100097f7d0
	false	undefined	0							undefined	0	58e399a05ba4cb100097f8ab		false	118485	233	112	0	0	0	0	1	undefined	58e3992a5ba4cb100097f7d0
	false	undefined	0							undefined	0	58e399a15ba4cb100097f8ac		false	119018	234	113	0	0	0	0	1	undefined	58e3992a5ba4cb100097f7d0
	false	undefined	0							undefined	0	58e399a15ba4cb100097f8ad		false	119551	235	111	0	0	0	0	1	undefined	58e3992a5ba4cb100097f7d0
	false	undefined	0							undefined	0	58e399a25ba4cb100097f8ae		false	120042	236	113	0	0	0	0	1	undefined	58e3992a5ba4cb100097f7d0
	false	undefined	0							undefined	0	58e399a25ba4cb100097f8af		false	120599	237	112	0	0	0	0	1	undefined	58e3992a5ba4cb100097f7d0
	false	undefined	0							undefined	0	58e399a35ba4cb100097f8b0		false	121162	238	111	0	0	0	0	1	undefined	58e3992a5ba4cb100097f7d0
	false	undefined	0							undefined	0	58e399a45ba4cb100097f8b1		false	121688	239	114	0	0	0	0	1	undefined	58e3992a5ba4cb100097f7d0
	false	undefined	0							undefined	0	58e399a45ba4cb100097f8b2		false	122240	240	114	0	0	0	0	1	undefined	58e3992a5ba4cb100097f7d0
	false	undefined	0							undefined	0	58e399a55ba4cb100097f8b3		false	122761	241	113	0	0	0	0	1	undefined	58e3992a5ba4cb100097f7d0
	false	undefined	0							undefined	0	58e399a55ba4cb100097f8b4		false	123362	242	115	0	0	0	0	1	undefined	58e3992a5ba4cb100097f7d0
	false	undefined	0							undefined	0	58e399a65ba4cb100097f8b5		false	123818	243	114	0	0	0	0	1	undefined	58e3992a5ba4cb100097f7d0
	false	undefined	0							undefined	0	58e399a65ba4cb100097f8b6		false	124357	244	112	0	0	0	0	1	undefined	58e3992a5ba4cb100097f7d0
	false	undefined	0							undefined	0	58e399a75ba4cb100097f8b7		false	124891	245	109	0	0	0	0	1	undefined	58e3992a5ba4cb100097f7d0
	false	undefined	0							undefined	0	58e399a75ba4cb100097f8b8		false	125411	246	110	0	0	0	0	1	undefined	58e3992a5ba4cb100097f7d0
	false	undefined	0							undefined	0	58e399a85ba4cb100097f8b9		false	125959	247	113	0	0	0	0	1	undefined	58e3992a5ba4cb100097f7d0
	false	undefined	0							undefined	0	58e399a85ba4cb100097f8ba		false	126497	248	113	0	0	0	0	1	undefined	58e3992a5ba4cb100097f7d0
	false	undefined	0							undefined	0	58e399a95ba4cb100097f8bb		false	127026	249	113	0	0	0	0	1	undefined	58e3992a5ba4cb100097f7d0
	false	undefined	0							undefined	0	58e399a95ba4cb100097f8bc		false	127487	250	111	0	0	0	0	1	undefined	58e3992a5ba4cb100097f7d0
	false	undefined	0							undefined	0	58e399aa5ba4cb100097f8bd		false	128150	251	111	0	0	0	0	1	undefined	58e3992a5ba4cb100097f7d0
	false	undefined	0							undefined	0	58e399ab5ba4cb100097f8be		false	128716	252	112	0	0	0	0	1	undefined	58e3992a5ba4cb100097f7d0
	false	undefined	0							undefined	0	58e399ab5ba4cb100097f8bf		false	129171	253	112	0	0	0	0	1	undefined	58e3992a5ba4cb100097f7d0
	false	undefined	0							undefined	0	58e399ac5ba4cb100097f8c0		false	129775	254	112	0	0	0	0	1	undefined	58e3992a5ba4cb100097f7d0
	false	undefined	0							undefined	0	58e399ac5ba4cb100097f8c1		false	130306	255	113	0	0	0	0	1	undefined	58e3992a5ba4cb100097f7d0
	false	undefined	0							undefined	0	58e399ad5ba4cb100097f8c2		false	130854	256	115	0	0	0	0	1	undefined	58e3992a5ba4cb100097f7d0
	false	undefined	0							undefined	0	58e399ad5ba4cb100097f8c3		false	131368	257	115	0	0	0	0	1	undefined	58e3992a5ba4cb100097f7d0
	false	undefined	0							undefined	0	58e399ae5ba4cb100097f8c4		false	131834	258	113	0	0	0	0	1	undefined	58e3992a5ba4cb100097f7d0
	false	undefined	0							undefined	0	58e399ae5ba4cb100097f8c5		false	132363	259	115	0	0	0	0	1	undefined	58e3992a5ba4cb100097f7d0
	false	undefined	0							undefined	0	58e399af5ba4cb100097f8c6		false	132936	260	111	0	0	0	0	1	undefined	58e3992a5ba4cb100097f7d0
	false	undefined	0							undefined	0	58e399af5ba4cb100097f8c7		false	133448	261	110	0	0	0	0	1	undefined	58e3992a5ba4cb100097f7d0
	false	undefined	0							undefined	0	58e399b05ba4cb100097f8c8		false	133980	262	109	0	0	0	0	1	undefined	58e3992a5ba4cb100097f7d0
	false	undefined	0							undefined	0	58e399b05ba4cb100097f8c9		false	134524	263	110	0	0	0	0	1	undefined	58e3992a5ba4cb100097f7d0
	false	undefined	0							undefined	0	58e399b15ba4cb100097f8ca		false	135125	264	112	0	0	0	0	1	undefined	58e3992a5ba4cb100097f7d0
	false	undefined	0							undefined	0	58e399b25ba4cb100097f8cb		false	135636	265	113	0	0	0	0	1	undefined	58e3992a5ba4cb100097f7d0
	false	undefined	0							undefined	0	58e399b25ba4cb100097f8cc		false	136186	266	112	0	0	0	0	1	undefined	58e3992a5ba4cb100097f7d0
	false	undefined	0							undefined	0	58e399b35ba4cb100097f8cd		false	136728	267	109	0	0	0	0	1	undefined	58e3992a5ba4cb100097f7d0
	false	undefined	0							undefined	0	58e399b35ba4cb100097f8ce		false	137255	268	108	0	0	0	0	1	undefined	58e3992a5ba4cb100097f7d0
	false	undefined	0							undefined	0	58e399b45ba4cb100097f8cf		false	137795	269	110	0	0	0	0	1	undefined	58e3992a5ba4cb100097f7d0
	false	undefined	0							undefined	0	58e399b45ba4cb100097f8d0		false	138332	270	109	0	0	0	0	1	undefined	58e3992a5ba4cb100097f7d0
	false	undefined	0							undefined	0	58e399b55ba4cb100097f8d1		false	138849	271	109	0	0	0	0	1	undefined	58e3992a5ba4cb100097f7d0
	false	undefined	0							undefined	0	58e399b55ba4cb100097f8d2		false	139405	272	110	0	0	0	0	1	undefined	58e3992a5ba4cb100097f7d0
	false	undefined	0							undefined	0	58e399b65ba4cb100097f8d3		false	139999	273	112	0	0	0	0	1	undefined	58e3992a5ba4cb100097f7d0
	false	undefined	0							undefined	0	58e399b65ba4cb100097f8d4		false	140531	274	112	0	0	0	0	1	undefined	58e3992a5ba4cb100097f7d0
	false	undefined	0							undefined	0	58e399b75ba4cb100097f8d5		false	141077	275	111	0	0	0	0	1	undefined	58e3992a5ba4cb100097f7d0
	false	undefined	0							undefined	0	58e399b75ba4cb100097f8d6		false	141590	276	110	0	0	0	0	1	undefined	58e3992a5ba4cb100097f7d0
	false	undefined	0							undefined	0	58e399b85ba4cb100097f8d7		false	142136	277	108	0	0	0	0	1	undefined	58e3992a5ba4cb100097f7d0
	false	undefined	0							undefined	0	58e399b95ba4cb100097f8d8		false	142756	278	104	0	0	0	0	1	undefined	58e3992a5ba4cb100097f7d0
	false	undefined	0							undefined	0	58e399b95ba4cb100097f8d9		false	143260	279	-1	0	0	0	0	1	undefined	58e3992a5ba4cb100097f7d0
	false	undefined	0							undefined	0	58e399ba5ba4cb100097f8da		false	143800	280	-1	0	0	0	0	1	undefined	58e3992a5ba4cb100097f7d0
	false	undefined	0							undefined	0	58e399ba5ba4cb100097f8db		true	144332	281	-1	0	0	0	0	1	undefined	58e3992a5ba4cb100097f7d0
	false	undefined	0							undefined	0	58e399bb5ba4cb100097f8dc		true	144853	285	-1	0	0	0	0	1	undefined	58e3992a5ba4cb100097f7d0
	false	undefined	0							undefined	0	58e399bb5ba4cb100097f8dd		true	145413	286	-1	0	0	0	0	1	undefined	58e3992a5ba4cb100097f7d0
	false	undefined	0							undefined	0	58e399bc5ba4cb100097f8de		true	145940	287	-1	0	0	0	0	1	undefined	58e3992a5ba4cb100097f7d0
	false	undefined	0							undefined	0	58e399bc5ba4cb100097f8df		true	146469	288	-1	0	0	0	0	1	undefined	58e3992a5ba4cb100097f7d0
	false	undefined	0							undefined	0	58e399bd5ba4cb100097f8e0		true	147095	289	-1	0	0	0	0	1	undefined	58e3992a5ba4cb100097f7d0
	false	undefined	0							undefined	0	58e399bd5ba4cb100097f8e1		false	147545	290	-1	0	0	0	0	1	undefined	58e3992a5ba4cb100097f7d0
	false	undefined	0							undefined	0	58e399be5ba4cb100097f8e2		true	148065	291	-1	0	0	0	0	1	undefined	58e3992a5ba4cb100097f7d0
	false	undefined	0							undefined	0	58e399be5ba4cb100097f8e3		true	148625	292	-1	0	0	0	0	1	undefined	58e3992a5ba4cb100097f7d0
	false	undefined	0							undefined	0	58e399bf5ba4cb100097f8e4		true	149132	293	-1	0	0	0	0	1	undefined	58e3992a5ba4cb100097f7d0
	false	undefined	0							undefined	0	58e399c05ba4cb100097f8e5		true	149635	294	-1	0	0	0	0	1	undefined	58e3992a5ba4cb100097f7d0
	false	undefined	0							undefined	0	58e399c05ba4cb100097f8e6		true	150129	295	-1	0	0	0	0	1	undefined	58e3992a5ba4cb100097f7d0
	false	undefined	0							undefined	0	58e399c15ba4cb100097f8e7		true	150697	296	-1	0	0	0	0	1	undefined	58e3992a5ba4cb100097f7d0
	false	undefined	0							undefined	0	58e399c15ba4cb100097f8e8		true	151178	297	-1	0	0	0	0	1	undefined	58e3992a5ba4cb100097f7d0
	false	undefined	0							undefined	0	58e399c25ba4cb100097f8e9		true	151742	298	-1	0	0	0	0	1	undefined	58e3992a5ba4cb100097f7d0
	false	undefined	0							undefined	0	58e399c25ba4cb100097f8ea		true	152277	299	-1	0	0	0	0	1	undefined	58e3992a5ba4cb100097f7d0
	false	undefined	0							undefined	0	58e399c35ba4cb100097f8eb		true	152833	300	-1	0	0	0	0	1	undefined	58e3992a5ba4cb100097f7d0
	false	undefined	0							undefined	0	58e399c35ba4cb100097f8ec		true	153352	301	-1	0	0	0	0	1	undefined	58e3992a5ba4cb100097f7d0
	false	undefined	0							undefined	0	58e399c45ba4cb100097f8ed		false	153869	302	-1	0	0	0	0	1	undefined	58e3992a5ba4cb100097f7d0
	false	undefined	0							undefined	0	58e399c45ba4cb100097f8ee		false	154414	303	-1	0	0	0	0	1	undefined	58e3992a5ba4cb100097f7d0
	false	undefined	0							undefined	0	58e399c55ba4cb100097f8ef		false	154949	304	-1	0	0	0	0	1	undefined	58e3992a5ba4cb100097f7d0
	false	undefined	0							undefined	0	58e399c55ba4cb100097f8f0		false	155499	305	-1	0	0	0	0	1	undefined	58e3992a5ba4cb100097f7d0
	false	undefined	0							undefined	0	58e399c65ba4cb100097f8f1		false	155963	306	-1	0	0	0	0	1	undefined	58e3992a5ba4cb100097f7d0
	false	undefined	0							undefined	0	58e399c65ba4cb100097f8f2		false	156557	307	-1	0	0	0	0	1	undefined	58e3992a5ba4cb100097f7d0
	false	undefined	0							undefined	0	58e399c75ba4cb100097f8f3		false	157043	308	-1	0	0	0	0	1	undefined	58e3992a5ba4cb100097f7d0
	false	undefined	0							undefined	0	58e399c75ba4cb100097f8f4		false	157559	309	-1	0	0	0	0	1	undefined	58e3992a5ba4cb100097f7d0
	false	undefined	0							undefined	0	58e399c85ba4cb100097f8f5		true	158103	310	-1	0	0	0	0	1	undefined	58e3992a5ba4cb100097f7d0
	false	undefined	0							undefined	0	58e399c95ba4cb100097f8f6		true	158639	311	-1	0	0	0	0	1	undefined	58e3992a5ba4cb100097f7d0
	false	undefined	0							undefined	0	58e399c95ba4cb100097f8f7		true	159172	312	-1	0	0	0	0	1	undefined	58e3992a5ba4cb100097f7d0
	false	undefined	0							undefined	0	58e399ca5ba4cb100097f8f8		true	159783	313	-1	0	0	0	0	1	undefined	58e3992a5ba4cb100097f7d0
	false	undefined	0							undefined	0	58e399ca5ba4cb100097f8f9		true	160423	314	-1	0	0	0	0	1	undefined	58e3992a5ba4cb100097f7d0
	false	undefined	0							undefined	0	58e399cb5ba4cb100097f8fa		true	160907	315	-1	0	0	0	0	1	undefined	58e3992a5ba4cb100097f7d0
	false	undefined	0							undefined	0	58e399cb5ba4cb100097f8fb		true	161501	316	-1	0	0	0	0	1	undefined	58e3992a5ba4cb100097f7d0
	false	undefined	0							undefined	0	58e399cc5ba4cb100097f8fc		true	162046	317	-1	0	0	0	0	1	undefined	58e3992a5ba4cb100097f7d0
	false	undefined	0							undefined	0	58e399cc5ba4cb100097f8fd		false	162582	318	61	0	0	0	0	1	undefined	58e3992a5ba4cb100097f7d0
	false	undefined	0							undefined	0	58e399cd5ba4cb100097f8fe		false	163176	319	66	0	0	0	0	1	undefined	58e3992a5ba4cb100097f7d0
	false	undefined	0							undefined	0	58e399ce5ba4cb100097f8ff		true	163685	320	-1	0	0	0	0	1	undefined	58e3992a5ba4cb100097f7d0
	false	undefined	0							undefined	0	58e399ce5ba4cb100097f900		true	164239	324	-1	0	0	0	0	1	undefined	58e3992a5ba4cb100097f7d0
	false	undefined	0							undefined	0	58e399cf5ba4cb100097f901		true	164777	325	-1	0	0	0	0	1	undefined	58e3992a5ba4cb100097f7d0
	false	undefined	0							undefined	0	58e399cf5ba4cb100097f902		true	165306	326	109	0	0	0	0	1	undefined	58e3992a5ba4cb100097f7d0
	false	undefined	0							undefined	0	58e399d05ba4cb100097f903		false	165918	327	117	0	0	0	0	1	undefined	58e3992a5ba4cb100097f7d0
	false	undefined	0							undefined	0	58e399d05ba4cb100097f904		false	166434	328	116	0	0	0	0	1	undefined	58e3992a5ba4cb100097f7d0
	false	undefined	0							undefined	0	58e399d15ba4cb100097f905		false	166984	329	112	0	0	0	0	1	undefined	58e3992a5ba4cb100097f7d0
	false	undefined	0							undefined	0	58e399d15ba4cb100097f906		false	167527	330	113	0	0	0	0	1	undefined	58e3992a5ba4cb100097f7d0
	false	undefined	0							undefined	0	58e399d25ba4cb100097f907		false	167992	331	111	0	0	0	0	1	undefined	58e3992a5ba4cb100097f7d0
	false	undefined	0							undefined	0	58e399d25ba4cb100097f908		false	168522	332	113	0	0	0	0	1	undefined	58e3992a5ba4cb100097f7d0
	false	undefined	0							undefined	0	58e399d35ba4cb100097f909		false	169048	333	111	0	0	0	0	1	undefined	58e3992a5ba4cb100097f7d0
	false	undefined	0							undefined	0	58e399d35ba4cb100097f90a		false	169579	334	110	0	0	0	0	1	undefined	58e3992a5ba4cb100097f7d0
	false	undefined	0							undefined	0	58e399d45ba4cb100097f90b		false	170132	335	111	0	0	0	0	1	undefined	58e3992a5ba4cb100097f7d0
	false	undefined	0							undefined	0	58e399d45ba4cb100097f90c		false	170597	336	112	0	0	0	0	1	undefined	58e3992a5ba4cb100097f7d0
	false	undefined	0							undefined	0	58e399d55ba4cb100097f90d		false	171199	337	114	0	0	0	0	1	undefined	58e3992a5ba4cb100097f7d0
	false	undefined	0							undefined	0	58e399d65ba4cb100097f90e		false	171797	338	115	0	0	0	0	1	undefined	58e3992a5ba4cb100097f7d0
	false	undefined	0							undefined	0	58e399d65ba4cb100097f90f		false	172330	339	114	0	0	0	0	1	undefined	58e3992a5ba4cb100097f7d0
	false	undefined	0							undefined	0	58e399d75ba4cb100097f910		false	172773	340	111	0	0	0	0	1	undefined	58e3992a5ba4cb100097f7d0
	false	undefined	0							undefined	0	58e399d75ba4cb100097f911		false	173401	341	110	0	0	0	0	1	undefined	58e3992a5ba4cb100097f7d0
	false	undefined	0							undefined	0	58e399d85ba4cb100097f912		false	173928	342	111	0	0	0	0	1	undefined	58e3992a5ba4cb100097f7d0
	false	undefined	0							undefined	0	58e399d85ba4cb100097f913		false	174473	343	114	0	0	0	0	1	undefined	58e3992a5ba4cb100097f7d0
	false	undefined	0							undefined	0	58e399d95ba4cb100097f914		false	174995	344	113	0	0	0	0	1	undefined	58e3992a5ba4cb100097f7d0
	false	undefined	0							undefined	0	58e399d95ba4cb100097f915		false	175542	345	111	0	0	0	0	1	undefined	58e3992a5ba4cb100097f7d0
	false	undefined	0							undefined	0	58e399da5ba4cb100097f916		false	176060	346	111	0	0	0	0	1	undefined	58e3992a5ba4cb100097f7d0
	false	undefined	0							undefined	0	58e399da5ba4cb100097f917		false	176560	347	114	0	0	0	0	1	undefined	58e3992a5ba4cb100097f7d0
	false	undefined	0							undefined	0	58e399db5ba4cb100097f918		false	177142	348	115	0	0	0	0	1	undefined	58e3992a5ba4cb100097f7d0
	false	undefined	0							undefined	0	58e399db5ba4cb100097f919		false	177602	349	114	0	0	0	0	1	undefined	58e3992a5ba4cb100097f7d0
	false	undefined	0							undefined	0	58e399dc5ba4cb100097f91a		false	178212	350	112	0	0	0	0	1	undefined	58e3992a5ba4cb100097f7d0
	false	undefined	0							undefined	0	58e399dd5ba4cb100097f91b		false	178823	351	112	0	0	0	0	1	undefined	58e3992a5ba4cb100097f7d0
	false	undefined	0							undefined	0	58e399dd5ba4cb100097f91c		false	179285	352	115	0	0	0	0	1	undefined	58e3992a5ba4cb100097f7d0
	false	undefined	0							undefined	0	58e399de5ba4cb100097f91d		false	179807	353	114	0	0	0	0	1	undefined	58e3992a5ba4cb100097f7d0
	false	undefined	0							undefined	0	58e399de5ba4cb100097f91e		false	180338	354	112	0	0	0	0	1	undefined	58e3992a5ba4cb100097f7d0
	false	undefined	0							undefined	0	58e399df5ba4cb100097f91f		false	180875	355	115	0	0	0	0	1	undefined	58e3992a5ba4cb100097f7d0
	false	undefined	0							undefined	0	58e399df5ba4cb100097f920		false	181420	356	115	0	0	0	0	1	undefined	58e3992a5ba4cb100097f7d0
	false	undefined	0							undefined	0	58e399e05ba4cb100097f921		false	181895	357	114	0	0	0	0	1	undefined	58e3992a5ba4cb100097f7d0
	false	undefined	0							undefined	0	58e399e05ba4cb100097f922		false	182421	358	113	0	0	0	0	1	undefined	58e3992a5ba4cb100097f7d0
	false	undefined	0							undefined	0	58e399e15ba4cb100097f923		false	183046	359	111	0	0	0	0	1	undefined	58e3992a5ba4cb100097f7d0
	false	undefined	0							undefined	0	58e399e25ba4cb100097f924		false	183646	360	114	0	0	0	0	1	undefined	58e3992a5ba4cb100097f7d0
	false	undefined	0							undefined	0	58e399e25ba4cb100097f925		false	184139	361	113	0	0	0	0	1	undefined	58e3992a5ba4cb100097f7d0
	false	undefined	0							undefined	0	58e399e35ba4cb100097f926		false	184678	362	111	0	0	0	0	1	undefined	58e3992a5ba4cb100097f7d0
	false	undefined	0							undefined	0	58e399e35ba4cb100097f927		false	185202	363	111	0	0	0	0	1	undefined	58e3992a5ba4cb100097f7d0
	false	undefined	0							undefined	0	58e399e45ba4cb100097f928		false	185733	364	113	0	0	0	0	1	undefined	58e3992a5ba4cb100097f7d0
	false	undefined	0							undefined	0	58e399e45ba4cb100097f929		false	186220	365	112	0	0	0	0	1	undefined	58e3992a5ba4cb100097f7d0
	false	undefined	0							undefined	0	58e399e55ba4cb100097f92a		false	186752	366	111	0	0	0	0	1	undefined	58e3992a5ba4cb100097f7d0
	false	undefined	0							undefined	0	58e399e55ba4cb100097f92b		false	187216	367	110	0	0	0	0	1	undefined	58e3992a5ba4cb100097f7d0
	false	undefined	0							undefined	0	58e399e65ba4cb100097f92c		false	187751	368	112	0	0	0	0	1	undefined	58e3992a5ba4cb100097f7d0
	false	undefined	0							undefined	0	58e399e65ba4cb100097f92d		false	188400	369	113	0	0	0	0	1	undefined	58e3992a5ba4cb100097f7d0
	false	undefined	0							undefined	0	58e399e75ba4cb100097f92e		false	188965	370	112	0	0	0	0	1	undefined	58e3992a5ba4cb100097f7d0
	false	undefined	0							undefined	0	58e399e75ba4cb100097f92f		false	189544	371	116	0	0	0	0	1	undefined	58e3992a5ba4cb100097f7d0
	false	undefined	0							undefined	0	58e399e85ba4cb100097f930		false	190028	372	113	0	0	0	0	1	undefined	58e3992a5ba4cb100097f7d0
	false	undefined	0							undefined	0	58e399e85ba4cb100097f931		false	190586	373	113	0	0	0	0	1	undefined	58e3992a5ba4cb100097f7d0
	false	undefined	0							undefined	0	58e399e95ba4cb100097f932		false	191176	374	111	0	0	0	0	1	undefined	58e3992a5ba4cb100097f7d0
	false	undefined	0							undefined	0	58e399ea5ba4cb100097f933		false	191696	375	110	0	0	0	0	1	undefined	58e3992a5ba4cb100097f7d0
	false	undefined	0							undefined	0	58e399ea5ba4cb100097f934		false	192221	376	112	0	0	0	0	1	undefined	58e3992a5ba4cb100097f7d0
	false	undefined	0							undefined	0	58e399eb5ba4cb100097f935		false	192771	377	111	0	0	0	0	1	undefined	58e3992a5ba4cb100097f7d0
	false	undefined	0							undefined	0	58e399eb5ba4cb100097f936		false	193318	378	114	0	0	0	0	1	undefined	58e3992a5ba4cb100097f7d0
	false	undefined	0							undefined	0	58e399ec5ba4cb100097f937		false	193834	379	116	0	0	0	0	1	undefined	58e3992a5ba4cb100097f7d0
	false	undefined	0							undefined	0	58e399ec5ba4cb100097f938		false	194301	380	112	0	0	0	0	1	undefined	58e3992a5ba4cb100097f7d0
	false	undefined	0							undefined	0	58e399ed5ba4cb100097f939		false	194849	381	110	0	0	0	0	1	undefined	58e3992a5ba4cb100097f7d0
	false	undefined	0							undefined	0	58e399ed5ba4cb100097f93a		false	195384	382	111	0	0	0	0	1	undefined	58e3992a5ba4cb100097f7d0
	false	undefined	0							undefined	0	58e399ee5ba4cb100097f93b		false	195902	383	114	0	0	0	0	1	undefined	58e3992a5ba4cb100097f7d0
	false	undefined	0							undefined	0	58e399ee5ba4cb100097f93c		false	196428	384	114	0	0	0	0	1	undefined	58e3992a5ba4cb100097f7d0
	false	undefined	0							undefined	0	58e399ef5ba4cb100097f93d		false	196926	385	112	0	0	0	0	1	undefined	58e3992a5ba4cb100097f7d0
	false	undefined	0							undefined	0	58e399ef5ba4cb100097f93e		false	197496	386	114	0	0	0	0	1	undefined	58e3992a5ba4cb100097f7d0
	false	undefined	0							undefined	0	58e399f05ba4cb100097f93f		false	197964	387	115	0	0	0	0	1	undefined	58e3992a5ba4cb100097f7d0
	false	undefined	0							undefined	0	58e399f05ba4cb100097f940		false	198523	388	115	0	0	0	0	1	undefined	58e3992a5ba4cb100097f7d0
	false	undefined	0							undefined	0	58e399f15ba4cb100097f941		false	199049	389	113	0	0	0	0	1	undefined	58e3992a5ba4cb100097f7d0
	false	undefined	0							undefined	0	58e399f15ba4cb100097f942		false	199531	390	114	0	0	0	0	1	undefined	58e3992a5ba4cb100097f7d0
	false	undefined	0							undefined	0	58e399f25ba4cb100097f943		false	200111	391	114	0	0	0	0	1	undefined	58e3992a5ba4cb100097f7d0
	false	undefined	0							undefined	0	58e399f25ba4cb100097f944		false	200627	392	114	0	0	0	0	1	undefined	58e3992a5ba4cb100097f7d0
	false	undefined	0							undefined	0	58e399f35ba4cb100097f945		false	201172	393	117	0	0	0	0	1	undefined	58e3992a5ba4cb100097f7d0
	false	undefined	0							undefined	0	58e399f45ba4cb100097f946		false	201643	394	115	0	0	0	0	1	undefined	58e3992a5ba4cb100097f7d0
	false	undefined	0							undefined	0	58e399f45ba4cb100097f947		false	202198	395	113	0	0	0	0	1	undefined	58e3992a5ba4cb100097f7d0
	false	undefined	0							undefined	0	58e399f55ba4cb100097f948		false	202691	396	111	0	0	0	0	1	undefined	58e3992a5ba4cb100097f7d0
	false	undefined	0							undefined	0	58e399f55ba4cb100097f949		false	203252	397	107	0	0	0	0	1	undefined	58e3992a5ba4cb100097f7d0
	false	undefined	0							undefined	0	58e399f65ba4cb100097f94a		false	203777	398	109	0	0	0	0	1	undefined	58e3992a5ba4cb100097f7d0
	false	undefined	0							undefined	0	58e399f65ba4cb100097f94b		false	204298	399	111	0	0	0	0	1	undefined	58e3992a5ba4cb100097f7d0
	false	undefined	0							undefined	0	58e399f75ba4cb100097f94c		false	204857	400	113	0	0	0	0	1	undefined	58e3992a5ba4cb100097f7d0
	false	undefined	0							undefined	0	58e399f75ba4cb100097f94d		false	205388	401	115	0	0	0	0	1	undefined	58e3992a5ba4cb100097f7d0
	false	undefined	0							undefined	0	58e399f85ba4cb100097f94e		false	205853	402	115	0	0	0	0	1	undefined	58e3992a5ba4cb100097f7d0
	false	undefined	0							undefined	0	58e399f85ba4cb100097f94f		false	206470	403	116	0	0	0	0	1	undefined	58e3992a5ba4cb100097f7d0
	false	undefined	0							undefined	0	58e399f95ba4cb100097f950		false	206997	404	116	0	0	0	0	1	undefined	58e3992a5ba4cb100097f7d0
	false	undefined	0							undefined	0	58e399f95ba4cb100097f951		false	207511	405	113	0	0	0	0	1	undefined	58e3992a5ba4cb100097f7d0
	false	undefined	0							undefined	0	58e399fa5ba4cb100097f952		false	208121	406	115	0	0	0	0	1	undefined	58e3992a5ba4cb100097f7d0
	false	undefined	0							undefined	0	58e399fb5ba4cb100097f953		false	208653	407	114	0	0	0	0	1	undefined	58e3992a5ba4cb100097f7d0
	false	undefined	0							undefined	0	58e399fb5ba4cb100097f954		false	209318	408	118	0	0	0	0	1	undefined	58e3992a5ba4cb100097f7d0
	false	undefined	0							undefined	0	58e399fc5ba4cb100097f955		false	209814	409	118	0	0	0	0	1	undefined	58e3992a5ba4cb100097f7d0
	false	undefined	0							undefined	0	58e399fc5ba4cb100097f956		false	210330	410	117	0	0	0	0	1	undefined	58e3992a5ba4cb100097f7d0
	false	undefined	0							undefined	0	58e399fd5ba4cb100097f957		false	210859	411	118	0	0	0	0	1	undefined	58e3992a5ba4cb100097f7d0
	false	undefined	0							undefined	0	58e399fd5ba4cb100097f958		false	211400	412	118	0	0	0	0	1	undefined	58e3992a5ba4cb100097f7d0
	false	undefined	0							undefined	0	58e399fe5ba4cb100097f959		false	211860	413	118	0	0	0	0	1	undefined	58e3992a5ba4cb100097f7d0
	false	undefined	0							undefined	0	58e399fe5ba4cb100097f95a		false	212387	414	118	0	0	0	0	1	undefined	58e3992a5ba4cb100097f7d0
	false	undefined	0							undefined	0	58e399ff5ba4cb100097f95b		false	212876	415	117	0	0	0	0	1	undefined	58e3992a5ba4cb100097f7d0
	false	undefined	0							undefined	0	58e399ff5ba4cb100097f95c		false	213408	416	121	0	0	0	0	1	undefined	58e3992a5ba4cb100097f7d0
	false	undefined	0							undefined	0	58e39a005ba4cb100097f95d		false	213951	417	122	0	0	0	0	1	undefined	58e3992a5ba4cb100097f7d0
	false	undefined	0							undefined	0	58e39a005ba4cb100097f95e		false	214486	418	121	0	0	0	0	1	undefined	58e3992a5ba4cb100097f7d0
	false	undefined	0							undefined	0	58e39a015ba4cb100097f95f		false	215020	419	117	0	0	0	0	1	undefined	58e3992a5ba4cb100097f7d0
	false	undefined	0							undefined	0	58e39a015ba4cb100097f960		false	215486	420	114	0	0	0	0	1	undefined	58e3992a5ba4cb100097f7d0
	false	undefined	0							undefined	0	58e39a025ba4cb100097f961		false	216021	421	114	0	0	0	0	1	undefined	58e3992a5ba4cb100097f7d0
	false	undefined	0							undefined	0	58e39a025ba4cb100097f962		false	216608	422	110	0	0	0	0	1	undefined	58e3992a5ba4cb100097f7d0
	false	undefined	0							undefined	0	58e39a035ba4cb100097f963		false	217133	423	110	0	0	0	0	1	undefined	58e3992a5ba4cb100097f7d0
	false	undefined	0							undefined	0	58e39a035ba4cb100097f964		false	217598	424	110	0	0	0	0	1	undefined	58e3992a5ba4cb100097f7d0
	false	undefined	0							undefined	0	58e39a045ba4cb100097f965		false	218152	425	115	0	0	0	0	1	undefined	58e3992a5ba4cb100097f7d0
	false	undefined	0							undefined	0	58e39a055ba4cb100097f966		false	218683	426	118	0	0	0	0	1	undefined	58e3992a5ba4cb100097f7d0
	false	undefined	0							undefined	0	58e39a055ba4cb100097f967		false	219140	427	116	0	0	0	0	1	undefined	58e3992a5ba4cb100097f7d0
	false	undefined	0							undefined	0	58e39a065ba4cb100097f968		false	219771	428	116	0	0	0	0	1	undefined	58e3992a5ba4cb100097f7d0
	false	undefined	0							undefined	0	58e39a065ba4cb100097f969		false	220361	429	114	0	0	0	0	1	undefined	58e3992a5ba4cb100097f7d0
	false	undefined	0							undefined	0	58e39a075ba4cb100097f96a		false	220970	430	116	0	0	0	0	1	undefined	58e3992a5ba4cb100097f7d0
	false	undefined	0							undefined	0	58e39a075ba4cb100097f96b		false	221487	431	116	0	0	0	0	1	undefined	58e3992a5ba4cb100097f7d0
	false	undefined	0							undefined	0	58e39a085ba4cb100097f96c		false	221966	432	116	0	0	0	0	1	undefined	58e3992a5ba4cb100097f7d0
	false	undefined	0							undefined	0	58e39a085ba4cb100097f96d		false	222566	433	120	0	0	0	0	1	undefined	58e3992a5ba4cb100097f7d0
	false	undefined	0							undefined	0	58e39a095ba4cb100097f96e		false	223098	434	121	0	0	0	0	1	undefined	58e3992a5ba4cb100097f7d0
	false	undefined	0							undefined	0	58e39a095ba4cb100097f96f		false	223621	435	121	0	0	0	0	1	undefined	58e3992a5ba4cb100097f7d0
	false	undefined	0							undefined	0	58e39a0a5ba4cb100097f970		false	224176	436	121	0	0	0	0	1	undefined	58e3992a5ba4cb100097f7d0
	false	undefined	0							undefined	0	58e39a0b5ba4cb100097f971		false	224690	437	119	0	0	0	0	1	undefined	58e3992a5ba4cb100097f7d0
	false	undefined	0							undefined	0	58e39a0b5ba4cb100097f972		false	225156	438	117	0	0	0	0	1	undefined	58e3992a5ba4cb100097f7d0
	false	undefined	0							undefined	0	58e39a0c5ba4cb100097f973		false	225780	439	116	0	0	0	0	1	undefined	58e3992a5ba4cb100097f7d0
	false	undefined	0							undefined	0	58e39a0c5ba4cb100097f974		false	226299	440	113	0	0	0	0	1	undefined	58e3992a5ba4cb100097f7d0
	false	undefined	0							undefined	0	58e39a0d5ba4cb100097f975		false	226779	441	112	0	0	0	0	1	undefined	58e3992a5ba4cb100097f7d0
	false	undefined	0							undefined	0	58e39a0d5ba4cb100097f976		false	227361	442	110	0	0	0	0	1	undefined	58e3992a5ba4cb100097f7d0
	false	undefined	0							undefined	0	58e39a0e5ba4cb100097f977		false	227879	443	111	0	0	0	0	1	undefined	58e3992a5ba4cb100097f7d0
	false	undefined	0							undefined	0	58e39a0e5ba4cb100097f978		false	228436	444	115	0	0	0	0	1	undefined	58e3992a5ba4cb100097f7d0
	false	undefined	0							undefined	0	58e39a0f5ba4cb100097f979		false	228974	445	112	0	0	0	0	1	undefined	58e3992a5ba4cb100097f7d0
	false	undefined	0							undefined	0	58e39a0f5ba4cb100097f97a		false	229571	446	116	0	0	0	0	1	undefined	58e3992a5ba4cb100097f7d0
	false	undefined	0							undefined	0	58e39a105ba4cb100097f97b		false	230024	447	115	0	0	0	0	1	undefined	58e3992a5ba4cb100097f7d0
	false	undefined	0							undefined	0	58e39a115ba4cb100097f97c		false	230644	448	117	0	0	0	0	1	undefined	58e3992a5ba4cb100097f7d0
	false	undefined	0							undefined	0	58e39a115ba4cb100097f97d		false	231150	449	117	0	0	0	0	1	undefined	58e3992a5ba4cb100097f7d0
	false	undefined	0							undefined	0	58e39a125ba4cb100097f97e		false	231662	450	113	0	0	0	0	1	undefined	58e3992a5ba4cb100097f7d0
	false	undefined	0							undefined	0	58e39a125ba4cb100097f97f		false	232242	451	112	0	0	0	0	1	undefined	58e3992a5ba4cb100097f7d0
	false	undefined	0							undefined	0	58e39a135ba4cb100097f980		false	232765	452	112	0	0	0	0	1	undefined	58e3992a5ba4cb100097f7d0
	false	undefined	0							undefined	0	58e39a135ba4cb100097f981		false	233324	453	113	0	0	0	0	1	undefined	58e3992a5ba4cb100097f7d0
	false	undefined	0							undefined	0	58e39a145ba4cb100097f982		false	233850	454	110	0	0	0	0	1	undefined	58e3992a5ba4cb100097f7d0
	false	undefined	0							undefined	0	58e39a145ba4cb100097f983		false	234370	455	107	0	0	0	0	1	undefined	58e3992a5ba4cb100097f7d0
	false	undefined	0							undefined	0	58e39a155ba4cb100097f984		false	234915	456	107	0	0	0	0	1	undefined	58e3992a5ba4cb100097f7d0
	false	undefined	0							undefined	0	58e39a155ba4cb100097f985		false	235448	457	108	0	0	0	0	1	undefined	58e3992a5ba4cb100097f7d0
	false	undefined	0							undefined	0	58e39a165ba4cb100097f986		false	235988	458	108	0	0	0	0	1	undefined	58e3992a5ba4cb100097f7d0
	false	undefined	0							undefined	0	58e39a165ba4cb100097f987		false	236515	459	109	0	0	0	0	1	undefined	58e3992a5ba4cb100097f7d0
	false	undefined	0							undefined	0	58e39a175ba4cb100097f988		false	237076	460	110	0	0	0	0	1	undefined	58e3992a5ba4cb100097f7d0
	false	undefined	0							undefined	0	58e39a175ba4cb100097f989		false	237606	461	112	0	0	0	0	1	undefined	58e3992a5ba4cb100097f7d0
	false	undefined	0							undefined	0	58e39a185ba4cb100097f98a		false	238067	462	113	0	0	0	0	1	undefined	58e3992a5ba4cb100097f7d0
	false	undefined	0							undefined	0	58e39a185ba4cb100097f98b		false	238546	463	112	0	0	0	0	1	undefined	58e3992a5ba4cb100097f7d0
	false	undefined	0							undefined	0	58e39a195ba4cb100097f98c		false	239117	464	111	0	0	0	0	1	undefined	58e3992a5ba4cb100097f7d0
	false	undefined	0							undefined	0	58e39a1a5ba4cb100097f98d		false	239653	465	111	0	0	0	0	1	undefined	58e3992a5ba4cb100097f7d0
	false	undefined	0							undefined	0	58e39a1a5ba4cb100097f98e		false	240194	466	109	0	0	0	0	1	undefined	58e3992a5ba4cb100097f7d0
	false	undefined	0							undefined	0	58e39a1b5ba4cb100097f98f		false	240653	467	108	0	0	0	0	1	undefined	58e3992a5ba4cb100097f7d0
	false	undefined	0							undefined	0	58e39a1b5ba4cb100097f990		false	241261	468	106	0	0	0	0	1	undefined	58e3992a5ba4cb100097f7d0
	false	undefined	0							undefined	0	58e39a1c5ba4cb100097f991		false	241802	469	108	0	0	0	0	1	undefined	58e3992a5ba4cb100097f7d0
	false	undefined	0							undefined	0	58e39a1c5ba4cb100097f992		false	242338	470	108	0	0	0	0	1	undefined	58e3992a5ba4cb100097f7d0
	false	undefined	0							undefined	0	58e39a1d5ba4cb100097f993		false	242873	471	110	0	0	0	0	1	undefined	58e3992a5ba4cb100097f7d0
	false	undefined	0							undefined	0	58e39a1d5ba4cb100097f994		false	243397	472	111	0	0	0	0	1	undefined	58e3992a5ba4cb100097f7d0
	false	undefined	0							undefined	0	58e39a1e5ba4cb100097f995		false	244003	473	114	0	0	0	0	1	undefined	58e3992a5ba4cb100097f7d0
	false	undefined	0							undefined	0	58e39a1e5ba4cb100097f996		false	244530	474	113	0	0	0	0	1	undefined	58e3992a5ba4cb100097f7d0
	false	undefined	0							undefined	0	58e39a1f5ba4cb100097f997		false	245071	475	111	0	0	0	0	1	undefined	58e3992a5ba4cb100097f7d0
	false	undefined	0							undefined	0	58e39a1f5ba4cb100097f998		false	245607	476	112	0	0	0	0	1	undefined	58e3992a5ba4cb100097f7d0
	false	undefined	0							undefined	0	58e39a205ba4cb100097f999		false	246141	477	112	0	0	0	0	1	undefined	58e3992a5ba4cb100097f7d0
	false	undefined	0							undefined	0	58e39a205ba4cb100097f99a		false	246619	478	114	0	0	0	0	1	undefined	58e3992a5ba4cb100097f7d0
	false	undefined	0							undefined	0	58e39a215ba4cb100097f99b		false	247203	479	115	0	0	0	0	1	undefined	58e3992a5ba4cb100097f7d0
	false	undefined	0							undefined	0	58e39a225ba4cb100097f99c		false	247752	480	114	0	0	0	0	1	undefined	58e3992a5ba4cb100097f7d0
	false	undefined	0							undefined	0	58e39a225ba4cb100097f99d		false	248278	481	113	0	0	0	0	1	undefined	58e3992a5ba4cb100097f7d0
	false	undefined	0							undefined	0	58e39a235ba4cb100097f99e		false	248810	482	112	0	0	0	0	1	undefined	58e3992a5ba4cb100097f7d0
	false	undefined	0							undefined	0	58e39a235ba4cb100097f99f		false	249268	483	111	0	0	0	0	1	undefined	58e3992a5ba4cb100097f7d0
	false	undefined	0							undefined	0	58e39a245ba4cb100097f9a0		false	249885	484	111	0	0	0	0	1	undefined	58e3992a5ba4cb100097f7d0
	false	undefined	0							undefined	0	58e39a245ba4cb100097f9a1		false	250415	485	109	0	0	0	0	1	undefined	58e3992a5ba4cb100097f7d0
	false	undefined	0							undefined	0	58e39a255ba4cb100097f9a2		false	251036	486	109	0	0	0	0	1	undefined	58e3992a5ba4cb100097f7d0
	false	undefined	0							undefined	0	58e39a255ba4cb100097f9a3		false	251558	487	110	0	0	0	0	1	undefined	58e3992a5ba4cb100097f7d0
	false	undefined	0							undefined	0	58e39a265ba4cb100097f9a4		false	252042	488	111	0	0	0	0	1	undefined	58e3992a5ba4cb100097f7d0
	false	undefined	0							undefined	0	58e39a265ba4cb100097f9a5		false	252598	489	111	0	0	0	0	1	undefined	58e3992a5ba4cb100097f7d0
	false	undefined	0							undefined	0	58e39a275ba4cb100097f9a6		false	253158	490	111	0	0	0	0	1	undefined	58e3992a5ba4cb100097f7d0
	false	undefined	0							undefined	0	58e39a285ba4cb100097f9a7		false	253654	491	114	0	0	0	0	1	undefined	58e3992a5ba4cb100097f7d0
	false	undefined	0							undefined	0	58e39a285ba4cb100097f9a8		false	254172	492	114	0	0	0	0	1	undefined	58e3992a5ba4cb100097f7d0
	false	undefined	0							undefined	0	58e39a295ba4cb100097f9a9		false	254750	493	112	0	0	0	0	1	undefined	58e3992a5ba4cb100097f7d0
	false	undefined	0							undefined	0	58e39a295ba4cb100097f9aa		false	255295	494	111	0	0	0	0	1	undefined	58e3992a5ba4cb100097f7d0
	false	undefined	0							undefined	0	58e39a2a5ba4cb100097f9ab		false	255911	495	112	0	0	0	0	1	undefined	58e3992a5ba4cb100097f7d0
	false	undefined	0							undefined	0	58e39a2a5ba4cb100097f9ac		false	256427	496	111	0	0	0	0	1	undefined	58e3992a5ba4cb100097f7d0
	false	undefined	0							undefined	0	58e39a2b5ba4cb100097f9ad		false	256961	497	109	0	0	0	0	1	undefined	58e3992a5ba4cb100097f7d0
	false	undefined	0							undefined	0	58e39a2b5ba4cb100097f9ae		false	257490	498	109	0	0	0	0	1	undefined	58e3992a5ba4cb100097f7d0
	false	undefined	0							undefined	0	58e39a2c5ba4cb100097f9af		false	258012	499	111	0	0	0	0	1	undefined	58e3992a5ba4cb100097f7d0
	false	undefined	0							undefined	0	58e39a2c5ba4cb100097f9b0		false	258580	500	113	0	0	0	0	1	undefined	58e3992a5ba4cb100097f7d0
	false	undefined	0							undefined	0	58e39a2d5ba4cb100097f9b1		false	259091	501	113	0	0	0	0	1	undefined	58e3992a5ba4cb100097f7d0
	false	undefined	0							undefined	0	58e39a2e5ba4cb100097f9b2		false	259633	502	112	0	0	0	0	1	undefined	58e3992a5ba4cb100097f7d0
	false	undefined	0							undefined	0	58e39a2e5ba4cb100097f9b3		false	260163	503	110	0	0	0	0	1	undefined	58e3992a5ba4cb100097f7d0
	false	undefined	0							undefined	0	58e39a2f5ba4cb100097f9b4		false	260631	504	107	0	0	0	0	1	undefined	58e3992a5ba4cb100097f7d0
	false	undefined	0							undefined	0	58e39a2f5ba4cb100097f9b5		false	261156	505	107	0	0	0	0	1	undefined	58e3992a5ba4cb100097f7d0
	false	undefined	0							undefined	0	58e39a305ba4cb100097f9b6		false	261708	506	104	0	0	0	0	1	undefined	58e3992a5ba4cb100097f7d0
	false	undefined	0							undefined	0	58e39a305ba4cb100097f9b7		false	262232	507	101	0	0	0	0	1	undefined	58e3992a5ba4cb100097f7d0
	false	undefined	0							undefined	0	58e39a315ba4cb100097f9b8		false	262773	508	99	0	0	0	0	1	undefined	58e3992a5ba4cb100097f7d0
	false	undefined	0							undefined	0	58e39a315ba4cb100097f9b9		false	263255	509	103	0	0	0	0	1	undefined	58e3992a5ba4cb100097f7d0
	false	undefined	0							undefined	0	58e39a325ba4cb100097f9ba		false	263766	510	106	0	0	0	0	1	undefined	58e3992a5ba4cb100097f7d0
	false	undefined	0							undefined	0	58e39a325ba4cb100097f9bb		false	264315	511	106	0	0	0	0	1	undefined	58e3992a5ba4cb100097f7d0
	false	undefined	0							undefined	0	58e39a335ba4cb100097f9bc		false	264846	512	106	0	0	0	0	1	undefined	58e3992a5ba4cb100097f7d0
	false	undefined	0							undefined	0	58e39a335ba4cb100097f9bd		false	265376	513	105	0	0	0	0	1	undefined	58e3992a5ba4cb100097f7d0
	false	undefined	0							undefined	0	58e39a345ba4cb100097f9be		false	265911	514	106	0	0	0	0	1	undefined	58e3992a5ba4cb100097f7d0
	false	undefined	0							undefined	0	58e39a355ba4cb100097f9bf		false	266612	515	106	0	0	0	0	1	undefined	58e3992a5ba4cb100097f7d0
	false	undefined	0							undefined	0	58e39a355ba4cb100097f9c0		false	267053	516	105	0	0	0	0	1	undefined	58e3992a5ba4cb100097f7d0
	false	undefined	0							undefined	0	58e39a355ba4cb100097f9c1		false	267570	517	107	0	0	0	0	1	undefined	58e3992a5ba4cb100097f7d0
	false	undefined	0							undefined	0	58e39a365ba4cb100097f9c2		false	268115	518	110	0	0	0	0	1	undefined	58e3992a5ba4cb100097f7d0
	false	undefined	0							undefined	0	58e39a375ba4cb100097f9c3		false	268665	519	112	0	0	0	0	1	undefined	58e3992a5ba4cb100097f7d0
	false	undefined	0							undefined	0	58e39a375ba4cb100097f9c4		false	269249	520	109	0	0	0	0	1	undefined	58e3992a5ba4cb100097f7d0
	false	undefined	0							undefined	0	58e39a385ba4cb100097f9c5		false	269764	521	107	0	0	0	0	1	undefined	58e3992a5ba4cb100097f7d0
	false	undefined	0							undefined	0	58e39a385ba4cb100097f9c6		false	270319	522	108	0	0	0	0	1	undefined	58e3992a5ba4cb100097f7d0
	false	undefined	0							undefined	0	58e39a395ba4cb100097f9c7		false	270856	523	107	0	0	0	0	1	undefined	58e3992a5ba4cb100097f7d0
	false	undefined	0							undefined	0	58e39a395ba4cb100097f9c8		false	271398	524	108	0	0	0	0	1	undefined	58e3992a5ba4cb100097f7d0
	false	undefined	0							undefined	0	58e39a3a5ba4cb100097f9c9		false	271918	525	109	0	0	0	0	1	undefined	58e3992a5ba4cb100097f7d0
	false	undefined	0							undefined	0	58e39a3a5ba4cb100097f9ca		false	272456	526	106	0	0	0	0	1	undefined	58e3992a5ba4cb100097f7d0
	false	undefined	0							undefined	0	58e39a3b5ba4cb100097f9cb		false	272993	527	104	0	0	0	0	1	undefined	58e3992a5ba4cb100097f7d0
	false	undefined	0							undefined	0	58e39a3b5ba4cb100097f9cc		false	273535	528	105	0	0	0	0	1	undefined	58e3992a5ba4cb100097f7d0
	false	undefined	0							undefined	0	58e39a3c5ba4cb100097f9cd		false	274058	529	107	0	0	0	0	1	undefined	58e3992a5ba4cb100097f7d0
	false	undefined	0							undefined	0	58e39a3c5ba4cb100097f9ce		false	274607	530	108	0	0	0	0	1	undefined	58e3992a5ba4cb100097f7d0
	false	undefined	0							undefined	0	58e39a3d5ba4cb100097f9cf		false	275123	531	108	0	0	0	0	1	undefined	58e3992a5ba4cb100097f7d0
	false	undefined	0							undefined	0	58e39a3e5ba4cb100097f9d0		false	275645	532	109	0	0	0	0	1	undefined	58e3992a5ba4cb100097f7d0
	false	undefined	0							undefined	0	58e39a3e5ba4cb100097f9d1		false	276142	533	106	0	0	0	0	1	undefined	58e3992a5ba4cb100097f7d0
	false	undefined	0							undefined	0	58e39a3f5ba4cb100097f9d2		false	276743	534	109	0	0	0	0	1	undefined	58e3992a5ba4cb100097f7d0
	false	undefined	0							undefined	0	58e39a3f5ba4cb100097f9d3		false	277263	535	111	0	0	0	0	1	undefined	58e3992a5ba4cb100097f7d0
	false	undefined	0							undefined	0	58e39a405ba4cb100097f9d4		false	277862	536	111	0	0	0	0	1	undefined	58e3992a5ba4cb100097f7d0
	false	undefined	0							undefined	0	58e39a405ba4cb100097f9d5		false	278321	537	106	0	0	0	0	1	undefined	58e3992a5ba4cb100097f7d0
	false	undefined	0							undefined	0	58e39a415ba4cb100097f9d6		false	278883	538	110	0	0	0	0	1	undefined	58e3992a5ba4cb100097f7d0
	false	undefined	0							undefined	0	58e39a415ba4cb100097f9d7		false	279417	539	113	0	0	0	0	1	undefined	58e3992a5ba4cb100097f7d0
	false	undefined	0							undefined	0	58e39a425ba4cb100097f9d8		false	279939	540	113	0	0	0	0	1	undefined	58e3992a5ba4cb100097f7d0
	false	undefined	0							undefined	0	58e39a425ba4cb100097f9d9		false	280432	541	115	0	0	0	0	1	undefined	58e3992a5ba4cb100097f7d0
	false	undefined	0							undefined	0	58e39a435ba4cb100097f9da		false	281004	542	114	0	0	0	0	1	undefined	58e3992a5ba4cb100097f7d0
	false	undefined	0							undefined	0	58e39a435ba4cb100097f9db		false	281456	543	112	0	0	0	0	1	undefined	58e3992a5ba4cb100097f7d0
	false	undefined	0							undefined	0	58e39a445ba4cb100097f9dc		true	282012	544	108	0	0	0	0	1	undefined	58e3992a5ba4cb100097f7d0
	false	undefined	0							undefined	0	58e39a445ba4cb100097f9dd		true	282552	545	-1	0	0	0	0	1	undefined	58e3992a5ba4cb100097f7d0
	false	undefined	0							undefined	0	58e39a455ba4cb100097f9de		true	283094	546	-1	0	0	0	0	1	undefined	58e3992a5ba4cb100097f7d0
	false	undefined	0							undefined	0	58e39a455ba4cb100097f9df		true	283604	547	-1	0	0	0	0	1	undefined	58e3992a5ba4cb100097f7d0
	false	undefined	0							undefined	0	58e39a465ba4cb100097f9e0		true	284137	551	-1	0	0	0	0	1	undefined	58e3992a5ba4cb100097f7d0
	false	undefined	0							undefined	0	58e39a475ba4cb100097f9e1		true	284693	552	-1	0	0	0	0	1	undefined	58e3992a5ba4cb100097f7d0
	false	undefined	0							undefined	0	58e39a475ba4cb100097f9e2		true	285141	553	-1	0	0	0	0	1	undefined	58e3992a5ba4cb100097f7d0
	false	undefined	0							undefined	0	58e39a485ba4cb100097f9e3		true	285818	554	-1	0	0	0	0	1	undefined	58e3992a5ba4cb100097f7d0
	false	undefined	0							undefined	0	58e39a485ba4cb100097f9e4		true	286354	555	-1	0	0	0	0	1	undefined	58e3992a5ba4cb100097f7d0
	false	undefined	0							undefined	0	58e39a495ba4cb100097f9e5		false	286881	556	-1	0	0	0	0	1	undefined	58e3992a5ba4cb100097f7d0
	false	undefined	0							undefined	0	58e39a495ba4cb100097f9e6		false	287433	557	-1	0	0	0	0	1	undefined	58e3992a5ba4cb100097f7d0
	false	undefined	0							undefined	0	58e39a4a5ba4cb100097f9e7		false	287961	558	-1	0	0	0	0	1	undefined	58e3992a5ba4cb100097f7d0
	false	undefined	0							undefined	0	58e39a4a5ba4cb100097f9e8		false	288490	559	-1	0	0	0	0	1	undefined	58e3992a5ba4cb100097f7d0
	false	undefined	0							undefined	0	58e39a4b5ba4cb100097f9e9		false	288970	560	-1	0	0	0	0	1	undefined	58e3992a5ba4cb100097f7d0
	false	undefined	0							undefined	0	58e39a4b5ba4cb100097f9ea		false	289486	561	-1	0	0	0	0	1	undefined	58e3992a5ba4cb100097f7d0
	false	undefined	0							undefined	0	58e39a4c5ba4cb100097f9eb		false	290023	562	-1	0	0	0	0	1	undefined	58e3992a5ba4cb100097f7d0
	false	undefined	0							undefined	0	58e39a4c5ba4cb100097f9ec		false	290505	563	-1	0	0	0	0	1	undefined	58e3992a5ba4cb100097f7d0
	false	undefined	0							undefined	0	58e39a4d5ba4cb100097f9ed		false	291034	564	-1	0	0	0	0	1	undefined	58e3992a5ba4cb100097f7d0
	false	undefined	0							undefined	0	58e39a4d5ba4cb100097f9ee		false	291550	565	-1	0	0	0	0	1	undefined	58e3992a5ba4cb100097f7d0
	false	undefined	0							undefined	0	58e39a4e5ba4cb100097f9ef		false	292090	566	-1	0	0	0	0	1	undefined	58e3992a5ba4cb100097f7d0
	false	undefined	0							undefined	0	58e39a4e5ba4cb100097f9f0		false	292631	567	-1	0	0	0	0	1	undefined	58e3992a5ba4cb100097f7d0
	false	undefined	0							undefined	0	58e39a4f5ba4cb100097f9f1		false	293168	568	-1	0	0	0	0	1	undefined	58e3992a5ba4cb100097f7d0
	false	undefined	0							undefined	0	58e39a505ba4cb100097f9f2		true	293758	569	-1	0	0	0	0	1	undefined	58e3992a5ba4cb100097f7d0
	false	undefined	0							undefined	0	58e39a505ba4cb100097f9f3		true	294300	570	-1	0	0	0	0	1	undefined	58e3992a5ba4cb100097f7d0
	false	undefined	0							undefined	0	58e39a515ba4cb100097f9f4		true	294839	571	-1	0	0	0	0	1	undefined	58e3992a5ba4cb100097f7d0
	false	undefined	0							undefined	0	58e39a515ba4cb100097f9f5		true	295377	572	-1	0	0	0	0	1	undefined	58e3992a5ba4cb100097f7d0
	false	undefined	0							undefined	0	58e39a525ba4cb100097f9f6		true	295980	573	-1	0	0	0	0	1	undefined	58e3992a5ba4cb100097f7d0
	false	undefined	0							undefined	0	58e39a525ba4cb100097f9f7		true	296488	574	-1	0	0	0	0	1	undefined	58e3992a5ba4cb100097f7d0
	false	undefined	0							undefined	0	58e39a535ba4cb100097f9f8		true	297042	575	-1	0	0	0	0	1	undefined	58e3992a5ba4cb100097f7d0
	false	undefined	0							undefined	0	58e39a535ba4cb100097f9f9		true	297568	576	-1	0	0	0	0	1	undefined	58e3992a5ba4cb100097f7d0
	false	undefined	0							undefined	0	58e39a545ba4cb100097f9fa		true	298106	577	-1	0	0	0	0	1	undefined	58e3992a5ba4cb100097f7d0
	false	undefined	0							undefined	0	58e39a545ba4cb100097f9fb		true	298532	578	-1	0	0	0	0	1	undefined	58e3992a5ba4cb100097f7d0
	false	undefined	0							undefined	0	58e39a555ba4cb100097f9fc		true	299108	579	-1	0	0	0	0	1	undefined	58e3992a5ba4cb100097f7d0
	false	undefined	0							undefined	0	58e39a565ba4cb100097f9fd		true	299718	580	-1	0	0	0	0	1	undefined	58e3992a5ba4cb100097f7d0
	false	undefined	0							undefined	0	58e39a565ba4cb100097f9fe		true	300248	581	-1	0	0	0	0	1	undefined	58e3992a5ba4cb100097f7d0
	false	undefined	0							undefined	0	58e39a575ba4cb100097f9ff		false	300780	582	-1	0	0	0	0	1	undefined	58e3992a5ba4cb100097f7d0
	false	undefined	0							undefined	0	58e39a575ba4cb100097fa00		false	301309	583	-1	0	0	0	0	1	undefined	58e3992a5ba4cb100097f7d0
	false	undefined	0							undefined	0	58e39a585ba4cb100097fa01		false	301834	584	-1	0	0	0	0	1	undefined	58e3992a5ba4cb100097f7d0
	false	undefined	0							undefined	0	58e39a585ba4cb100097fa02		false	302392	588	-1	0	0	0	0	1	undefined	58e3992a5ba4cb100097f7d0
	false	undefined	0							undefined	0	58e39a595ba4cb100097fa03		false	302927	589	-1	0	0	0	0	1	undefined	58e3992a5ba4cb100097f7d0
	false	undefined	0							undefined	0	58e39a595ba4cb100097fa04		false	303441	590	-1	0	0	0	0	1	undefined	58e3992a5ba4cb100097f7d0
	false	undefined	0							undefined	0	58e39a5a5ba4cb100097fa05		false	303976	591	-1	0	0	0	0	1	undefined	58e3992a5ba4cb100097f7d0
	false	undefined	0							undefined	0	58e39a5a5ba4cb100097fa06		true	304480	592	108	0	0	0	0	1	undefined	58e3992a5ba4cb100097f7d0
	false	undefined	0							undefined	0	58e39a5b5ba4cb100097fa07		false	304982	593	106	0	0	0	0	1	undefined	58e3992a5ba4cb100097f7d0
	false	undefined	0							undefined	0	58e39a5b5ba4cb100097fa08		false	305529	594	103	0	0	0	0	1	undefined	58e3992a5ba4cb100097f7d0
	false	undefined	0							undefined	0	58e39a5c5ba4cb100097fa09		false	306132	598	112	0	0	0	0	1	undefined	58e3992a5ba4cb100097f7d0
	false	undefined	0							undefined	0	58e39a5d5ba4cb100097fa0a		false	306662	599	111	0	0	0	0	1	undefined	58e3992a5ba4cb100097f7d0
	false	undefined	0							undefined	0	58e39a5d5ba4cb100097fa0b		false	307193	600	110	0	0	0	0	1	undefined	58e3992a5ba4cb100097f7d0
	false	undefined	0							undefined	0	58e39a5e5ba4cb100097fa0c		false	307717	601	108	0	0	0	0	1	undefined	58e3992a5ba4cb100097f7d0
	false	undefined	0							undefined	0	58e39a5e5ba4cb100097fa0d		false	308240	602	109	0	0	0	0	1	undefined	58e3992a5ba4cb100097f7d0
	false	undefined	0							undefined	0	58e39a5f5ba4cb100097fa0e		false	308795	603	110	0	0	0	0	1	undefined	58e3992a5ba4cb100097f7d0
	false	undefined	0							undefined	0	58e39a5f5ba4cb100097fa0f		false	309330	604	107	0	0	0	0	1	undefined	58e3992a5ba4cb100097f7d0
	false	undefined	0							undefined	0	58e39a605ba4cb100097fa10		false	309825	605	105	0	0	0	0	1	undefined	58e3992a5ba4cb100097f7d0
	false	undefined	0							undefined	0	58e39a605ba4cb100097fa11		false	310316	606	102	0	0	0	0	1	undefined	58e3992a5ba4cb100097f7d0
	false	undefined	0							undefined	0	58e39a615ba4cb100097fa12		false	310944	607	103	0	0	0	0	1	undefined	58e3992a5ba4cb100097f7d0
	false	undefined	0							undefined	0	58e39a615ba4cb100097fa13		false	311543	608	104	0	0	0	0	1	undefined	58e3992a5ba4cb100097f7d0
	false	undefined	0							undefined	0	58e39a625ba4cb100097fa14		false	312140	609	105	0	0	0	0	1	undefined	58e3992a5ba4cb100097f7d0
	false	undefined	0							undefined	0	58e39a635ba4cb100097fa15		false	312681	610	107	0	0	0	0	1	undefined	58e3992a5ba4cb100097f7d0
	false	undefined	0							undefined	0	58e39a635ba4cb100097fa16		false	313208	611	106	0	0	0	0	1	undefined	58e3992a5ba4cb100097f7d0
	false	undefined	0							undefined	0	58e39a645ba4cb100097fa17		false	313693	612	107	0	0	0	0	1	undefined	58e3992a5ba4cb100097f7d0
	false	undefined	0							undefined	0	58e39a645ba4cb100097fa18		false	314283	613	107	0	0	0	0	1	undefined	58e3992a5ba4cb100097f7d0
	false	undefined	0							undefined	0	58e39a655ba4cb100097fa19		false	314809	614	106	0	0	0	0	1	undefined	58e3992a5ba4cb100097f7d0
	false	undefined	0							undefined	0	58e39a655ba4cb100097fa1a		false	315345	615	104	0	0	0	0	1	undefined	58e3992a5ba4cb100097f7d0
	false	undefined	0							undefined	0	58e39a665ba4cb100097fa1b		false	315878	616	103	0	0	0	0	1	undefined	58e3992a5ba4cb100097f7d0
	false	undefined	0							undefined	0	58e39a665ba4cb100097fa1c		false	316405	617	105	0	0	0	0	1	undefined	58e3992a5ba4cb100097f7d0
	false	undefined	0							undefined	0	58e39a675ba4cb100097fa1d		false	316930	618	107	0	0	0	0	1	undefined	58e3992a5ba4cb100097f7d0
	false	undefined	0							undefined	0	58e39a675ba4cb100097fa1e		false	317483	619	109	0	0	0	0	1	undefined	58e3992a5ba4cb100097f7d0
	false	undefined	0							undefined	0	58e39a685ba4cb100097fa1f		false	318027	620	108	0	0	0	0	1	undefined	58e3992a5ba4cb100097f7d0
	false	undefined	0							undefined	0	58e39a685ba4cb100097fa20		false	318618	621	107	0	0	0	0	1	undefined	58e3992a5ba4cb100097f7d0
	false	undefined	0							undefined	0	58e39a695ba4cb100097fa21		false	319140	622	107	0	0	0	0	1	undefined	58e3992a5ba4cb100097f7d0
	false	undefined	0							undefined	0	58e39a6a5ba4cb100097fa22		false	319699	623	105	0	0	0	0	1	undefined	58e3992a5ba4cb100097f7d0
	false	undefined	0							undefined	0	58e39a6a5ba4cb100097fa23		false	320299	624	103	0	0	0	0	1	undefined	58e3992a5ba4cb100097f7d0
	false	undefined	0							undefined	0	58e39a6b5ba4cb100097fa24		false	320827	625	103	0	0	0	0	1	undefined	58e3992a5ba4cb100097f7d0
	false	undefined	0							undefined	0	58e39a6b5ba4cb100097fa25		false	321358	626	103	0	0	0	0	1	undefined	58e3992a5ba4cb100097f7d0
	false	undefined	0							undefined	0	58e39a6c5ba4cb100097fa26		false	321964	627	102	0	0	0	0	1	undefined	58e3992a5ba4cb100097f7d0
	false	undefined	0							undefined	0	58e39a6c5ba4cb100097fa27		false	322492	628	104	0	0	0	0	1	undefined	58e3992a5ba4cb100097f7d0
	false	undefined	0							undefined	0	58e39a6d5ba4cb100097fa28		false	323021	629	105	0	0	0	0	1	undefined	58e3992a5ba4cb100097f7d0
	false	undefined	0							undefined	0	58e39a6d5ba4cb100097fa29		false	323555	630	104	0	0	0	0	1	undefined	58e3992a5ba4cb100097f7d0
	false	undefined	0							undefined	0	58e39a6e5ba4cb100097fa2a		false	324105	631	102	0	0	0	0	1	undefined	58e3992a5ba4cb100097f7d0
	false	undefined	0							undefined	0	58e39a6f5ba4cb100097fa2b		false	324628	632	101	0	0	0	0	1	undefined	58e3992a5ba4cb100097f7d0
	false	undefined	0							undefined	0	58e39a6f5ba4cb100097fa2c		false	325171	633	101	0	0	0	0	1	undefined	58e3992a5ba4cb100097f7d0
	false	undefined	0							undefined	0	58e39a705ba4cb100097fa2d		false	325707	634	104	0	0	0	0	1	undefined	58e3992a5ba4cb100097f7d0
	false	undefined	0							undefined	0	58e39a705ba4cb100097fa2e		false	326241	635	106	0	0	0	0	1	undefined	58e3992a5ba4cb100097f7d0
	false	undefined	0							undefined	0	58e39a715ba4cb100097fa2f		false	326881	636	106	0	0	0	0	1	undefined	58e3992a5ba4cb100097f7d0
	false	undefined	0							undefined	0	58e39a715ba4cb100097fa30		false	327361	637	106	0	0	0	0	1	undefined	58e3992a5ba4cb100097f7d0
	false	undefined	0							undefined	0	58e39a725ba4cb100097fa31		false	327900	638	105	0	0	0	0	1	undefined	58e3992a5ba4cb100097f7d0
	false	undefined	0							undefined	0	58e39a725ba4cb100097fa32		false	328484	639	107	0	0	0	0	1	undefined	58e3992a5ba4cb100097f7d0
	false	undefined	0							undefined	0	58e39a735ba4cb100097fa33		false	328965	640	106	0	0	0	0	1	undefined	58e3992a5ba4cb100097f7d0
	false	undefined	0							undefined	0	58e39a735ba4cb100097fa34		false	329520	641	109	0	0	0	0	1	undefined	58e3992a5ba4cb100097f7d0
	false	undefined	0							undefined	0	58e39a745ba4cb100097fa35		false	330040	642	108	0	0	0	0	1	undefined	58e3992a5ba4cb100097f7d0
	false	undefined	0							undefined	0	58e39a745ba4cb100097fa36		false	330506	643	105	0	0	0	0	1	undefined	58e3992a5ba4cb100097f7d0
	false	undefined	0							undefined	0	58e39a755ba4cb100097fa37		false	331045	644	106	0	0	0	0	1	undefined	58e3992a5ba4cb100097f7d0
	false	undefined	0							undefined	0	58e39a755ba4cb100097fa38		false	331563	645	105	0	0	0	0	1	undefined	58e3992a5ba4cb100097f7d0
	false	undefined	0							undefined	0	58e39a765ba4cb100097fa39		false	332103	646	106	0	0	0	0	1	undefined	58e3992a5ba4cb100097f7d0
	false	undefined	0							undefined	0	58e39a765ba4cb100097fa3a		false	332641	647	106	0	0	0	0	1	undefined	58e3992a5ba4cb100097f7d0
	false	undefined	0							undefined	0	58e39a775ba4cb100097fa3b		false	333238	648	109	0	0	0	0	1	undefined	58e3992a5ba4cb100097f7d0
	false	undefined	0							undefined	0	58e39a785ba4cb100097fa3c		false	333774	649	109	0	0	0	0	1	undefined	58e3992a5ba4cb100097f7d0
	false	undefined	0							undefined	0	58e39a785ba4cb100097fa3d		false	334328	650	108	0	0	0	0	1	undefined	58e3992a5ba4cb100097f7d0
	false	undefined	0							undefined	0	58e39a795ba4cb100097fa3e		false	334843	651	109	0	0	0	0	1	undefined	58e3992a5ba4cb100097f7d0
	false	undefined	0							undefined	0	58e39a795ba4cb100097fa3f		false	335377	652	110	0	0	0	0	1	undefined	58e3992a5ba4cb100097f7d0
	false	undefined	0							undefined	0	58e39a7a5ba4cb100097fa40		false	335922	653	109	0	0	0	0	1	undefined	58e3992a5ba4cb100097f7d0
	false	undefined	0							undefined	0	58e39a7a5ba4cb100097fa41		false	336461	654	106	0	0	0	0	1	undefined	58e3992a5ba4cb100097f7d0
	false	undefined	0							undefined	0	58e39a7b5ba4cb100097fa42		false	337065	655	109	0	0	0	0	1	undefined	58e3992a5ba4cb100097f7d0
	false	undefined	0							undefined	0	58e39a7b5ba4cb100097fa43		false	337593	656	108	0	0	0	0	1	undefined	58e3992a5ba4cb100097f7d0
	false	undefined	0							undefined	0	58e39a7c5ba4cb100097fa44		false	338131	657	106	0	0	0	0	1	undefined	58e3992a5ba4cb100097f7d0
	false	undefined	0							undefined	0	58e39a7d5ba4cb100097fa45		false	338835	658	106	0	0	0	0	1	undefined	58e3992a5ba4cb100097f7d0
	false	undefined	0							undefined	0	58e39a7d5ba4cb100097fa46		false	339333	659	106	0	0	0	0	1	undefined	58e3992a5ba4cb100097f7d0
	false	undefined	0							undefined	0	58e39a7e5ba4cb100097fa47		false	339858	660	108	0	0	0	0	1	undefined	58e3992a5ba4cb100097f7d0
	false	undefined	0							undefined	0	58e39a7e5ba4cb100097fa48		false	340398	661	108	0	0	0	0	1	undefined	58e3992a5ba4cb100097f7d0
	false	undefined	0							undefined	0	58e39a7f5ba4cb100097fa49		false	341012	662	108	0	0	0	0	1	undefined	58e3992a5ba4cb100097f7d0
	false	undefined	0							undefined	0	58e39a7f5ba4cb100097fa4a		false	341604	663	109	0	0	0	0	1	undefined	58e3992a5ba4cb100097f7d0
	false	undefined	0							undefined	0	58e39a805ba4cb100097fa4b		false	342149	664	106	0	0	0	0	1	undefined	58e3992a5ba4cb100097f7d0
	false	undefined	0							undefined	0	58e39a815ba4cb100097fa4c		false	342671	665	107	0	0	0	0	1	undefined	58e3992a5ba4cb100097f7d0
	false	undefined	0							undefined	0	58e39a815ba4cb100097fa4d		false	343200	666	107	0	0	0	0	1	undefined	58e3992a5ba4cb100097f7d0
	false	undefined	0							undefined	0	58e39a825ba4cb100097fa4e		false	343680	667	109	0	0	0	0	1	undefined	58e3992a5ba4cb100097f7d0
	false	undefined	0							undefined	0	58e39a825ba4cb100097fa4f		false	344263	668	109	0	0	0	0	1	undefined	58e3992a5ba4cb100097f7d0
	false	undefined	0							undefined	0	58e39a835ba4cb100097fa50		false	344796	669	106	0	0	0	0	1	undefined	58e3992a5ba4cb100097f7d0
	false	undefined	0							undefined	0	58e39a835ba4cb100097fa51		false	345472	670	107	0	0	0	0	1	undefined	58e3992a5ba4cb100097f7d0
	false	undefined	0							undefined	0	58e39a845ba4cb100097fa52		false	345936	671	106	0	0	0	0	1	undefined	58e3992a5ba4cb100097f7d0
	false	undefined	0							undefined	0	58e39a845ba4cb100097fa53		false	346487	672	107	0	0	0	0	1	undefined	58e3992a5ba4cb100097f7d0
	false	undefined	0							undefined	0	58e39a855ba4cb100097fa54		false	347069	673	109	0	0	0	0	1	undefined	58e3992a5ba4cb100097f7d0
	false	undefined	0							undefined	0	58e39a855ba4cb100097fa55		false	347603	674	109	0	0	0	0	1	undefined	58e3992a5ba4cb100097f7d0
	false	undefined	0							undefined	0	58e39a865ba4cb100097fa56		false	348080	675	111	0	0	0	0	1	undefined	58e3992a5ba4cb100097f7d0
	false	undefined	0							undefined	0	58e39a875ba4cb100097fa57		false	348685	676	111	0	0	0	0	1	undefined	58e3992a5ba4cb100097f7d0
	false	undefined	0							undefined	0	58e39a875ba4cb100097fa58		false	349216	677	109	0	0	0	0	1	undefined	58e3992a5ba4cb100097f7d0
	false	undefined	0							undefined	0	58e39a885ba4cb100097fa59		false	349694	678	108	0	0	0	0	1	undefined	58e3992a5ba4cb100097f7d0
	false	undefined	0							undefined	0	58e39a885ba4cb100097fa5a		false	350276	679	105	0	0	0	0	1	undefined	58e3992a5ba4cb100097f7d0
	false	undefined	0							undefined	0	58e39a895ba4cb100097fa5b		false	350770	680	108	0	0	0	0	1	undefined	58e3992a5ba4cb100097f7d0
	false	undefined	0							undefined	0	58e39a895ba4cb100097fa5c		false	351292	681	105	0	0	0	0	1	undefined	58e3992a5ba4cb100097f7d0
	false	undefined	0							undefined	0	58e39a8a5ba4cb100097fa5d		false	351837	682	104	0	0	0	0	1	undefined	58e3992a5ba4cb100097f7d0
	false	undefined	0							undefined	0	58e39a8a5ba4cb100097fa5e		false	352366	683	104	0	0	0	0	1	undefined	58e3992a5ba4cb100097f7d0
	false	undefined	0							undefined	0	58e39a8b5ba4cb100097fa5f		false	352820	684	103	0	0	0	0	1	undefined	58e3992a5ba4cb100097f7d0
	false	undefined	0							undefined	0	58e39a8b5ba4cb100097fa60		false	353306	685	107	0	0	0	0	1	undefined	58e3992a5ba4cb100097f7d0
	false	undefined	0							undefined	0	58e39a8c5ba4cb100097fa61		false	353880	686	109	0	0	0	0	1	undefined	58e3992a5ba4cb100097f7d0
	false	undefined	0							undefined	0	58e39a8c5ba4cb100097fa62		false	354417	687	113	0	0	0	0	1	undefined	58e3992a5ba4cb100097f7d0
	false	undefined	0							undefined	0	58e39a8d5ba4cb100097fa63		false	354890	688	111	0	0	0	0	1	undefined	58e3992a5ba4cb100097f7d0
	false	undefined	0							undefined	0	58e39a8d5ba4cb100097fa64		false	355413	689	111	0	0	0	0	1	undefined	58e3992a5ba4cb100097f7d0
	false	undefined	0							undefined	0	58e39a8e5ba4cb100097fa65		false	355893	690	111	0	0	0	0	1	undefined	58e3992a5ba4cb100097f7d0
	false	undefined	0							undefined	0	58e39a8e5ba4cb100097fa66		false	356484	691	111	0	0	0	0	1	undefined	58e3992a5ba4cb100097f7d0
	false	undefined	0							undefined	0	58e39a8f5ba4cb100097fa67		false	357020	692	109	0	0	0	0	1	undefined	58e3992a5ba4cb100097f7d0
	false	undefined	0							undefined	0	58e39a8f5ba4cb100097fa68		false	357564	693	108	0	0	0	0	1	undefined	58e3992a5ba4cb100097f7d0
	false	undefined	0							undefined	0	58e39a905ba4cb100097fa69		false	358236	694	110	0	0	0	0	1	undefined	58e3992a5ba4cb100097f7d0
	false	undefined	0							undefined	0	58e39a915ba4cb100097fa6a		false	358772	695	109	0	0	0	0	1	undefined	58e3992a5ba4cb100097f7d0
	false	undefined	0							undefined	0	58e39a915ba4cb100097fa6b		false	359366	696	111	0	0	0	0	1	undefined	58e3992a5ba4cb100097f7d0
	false	undefined	0							undefined	0	58e39a925ba4cb100097fa6c		false	359898	697	110	0	0	0	0	1	undefined	58e3992a5ba4cb100097f7d0
	false	undefined	0							undefined	0	58e39a925ba4cb100097fa6d		false	360423	698	112	0	0	0	0	1	undefined	58e3992a5ba4cb100097f7d0
	false	undefined	0							undefined	0	58e39a935ba4cb100097fa6e		false	361028	699	115	0	0	0	0	1	undefined	58e3992a5ba4cb100097f7d0
	false	undefined	0							undefined	0	58e39a935ba4cb100097fa6f		false	361559	700	114	0	0	0	0	1	undefined	58e3992a5ba4cb100097f7d0
	false	undefined	0							undefined	0	58e39a945ba4cb100097fa70		false	362102	701	113	0	0	0	0	1	undefined	58e3992a5ba4cb100097f7d0
	false	undefined	0							undefined	0	58e39a955ba4cb100097fa71		false	362640	702	111	0	0	0	0	1	undefined	58e3992a5ba4cb100097f7d0
	false	undefined	0							undefined	0	58e39a955ba4cb100097fa72		false	363256	703	111	0	0	0	0	1	undefined	58e3992a5ba4cb100097f7d0
	false	undefined	0							undefined	0	58e39a965ba4cb100097fa73		false	363770	704	111	0	0	0	0	1	undefined	58e3992a5ba4cb100097f7d0
	false	undefined	0							undefined	0	58e39a965ba4cb100097fa74		false	364320	705	110	0	0	0	0	1	undefined	58e3992a5ba4cb100097f7d0
	false	undefined	0							undefined	0	58e39a975ba4cb100097fa75		false	364842	706	113	0	0	0	0	1	undefined	58e3992a5ba4cb100097f7d0
	false	undefined	0							undefined	0	58e39a975ba4cb100097fa76		false	365381	707	114	0	0	0	0	1	undefined	58e3992a5ba4cb100097f7d0
	false	undefined	0							undefined	0	58e39a985ba4cb100097fa77		false	365924	708	114	0	0	0	0	1	undefined	58e3992a5ba4cb100097f7d0
	false	undefined	0							undefined	0	58e39a985ba4cb100097fa78		false	366387	709	112	0	0	0	0	1	undefined	58e3992a5ba4cb100097f7d0
	false	undefined	0							undefined	0	58e39a995ba4cb100097fa79		false	366982	710	109	0	0	0	0	1	undefined	58e3992a5ba4cb100097f7d0
	false	undefined	0							undefined	0	58e39a995ba4cb100097fa7a		false	367578	711	112	0	0	0	0	1	undefined	58e3992a5ba4cb100097f7d0
	false	undefined	0							undefined	0	58e39a9a5ba4cb100097fa7b		false	368057	712	111	0	0	0	0	1	undefined	58e3992a5ba4cb100097f7d0
	false	undefined	0							undefined	0	58e39a9b5ba4cb100097fa7c		false	368656	713	109	0	0	0	0	1	undefined	58e3992a5ba4cb100097f7d0
	false	undefined	0							undefined	0	58e39a9b5ba4cb100097fa7d		false	369192	714	107	0	0	0	0	1	undefined	58e3992a5ba4cb100097f7d0
	false	undefined	0							undefined	0	58e39a9c5ba4cb100097fa7e		false	369717	715	109	0	0	0	0	1	undefined	58e3992a5ba4cb100097f7d0
	false	undefined	0							undefined	0	58e39a9c5ba4cb100097fa7f		false	370252	716	112	0	0	0	0	1	undefined	58e3992a5ba4cb100097f7d0
	false	undefined	0							undefined	0	58e39a9d5ba4cb100097fa80		false	370792	717	110	0	0	0	0	1	undefined	58e3992a5ba4cb100097f7d0
	false	undefined	0							undefined	0	58e39a9d5ba4cb100097fa81		false	371383	718	113	0	0	0	0	1	undefined	58e3992a5ba4cb100097f7d0
	false	undefined	0							undefined	0	58e39a9e5ba4cb100097fa82		false	371847	719	110	0	0	0	0	1	undefined	58e3992a5ba4cb100097f7d0
	false	undefined	0							undefined	0	58e39a9e5ba4cb100097fa83		false	372355	720	114	0	0	0	0	1	undefined	58e3992a5ba4cb100097f7d0
	false	undefined	0							undefined	0	58e39a9f5ba4cb100097fa84		false	372927	721	113	0	0	0	0	1	undefined	58e3992a5ba4cb100097f7d0
	false	undefined	0							undefined	0	58e39a9f5ba4cb100097fa85		false	373466	722	113	0	0	0	0	1	undefined	58e3992a5ba4cb100097f7d0
	false	undefined	0							undefined	0	58e39aa05ba4cb100097fa86		false	374067	723	112	0	0	0	0	1	undefined	58e3992a5ba4cb100097f7d0
	false	undefined	0							undefined	0	58e39aa05ba4cb100097fa87		false	374592	724	111	0	0	0	0	1	undefined	58e3992a5ba4cb100097f7d0
	false	undefined	0							undefined	0	58e39aa15ba4cb100097fa88		false	375108	725	113	0	0	0	0	1	undefined	58e3992a5ba4cb100097f7d0
	false	undefined	0							undefined	0	58e39aa25ba4cb100097fa89		false	375666	726	111	0	0	0	0	1	undefined	58e3992a5ba4cb100097f7d0
	false	undefined	0							undefined	0	58e39aa25ba4cb100097fa8a		false	376210	727	112	0	0	0	0	1	undefined	58e3992a5ba4cb100097f7d0
	false	undefined	0							undefined	0	58e39aa35ba4cb100097fa8b		false	376675	728	113	0	0	0	0	1	undefined	58e3992a5ba4cb100097f7d0
	false	undefined	0							undefined	0	58e39aa35ba4cb100097fa8c		false	377259	729	113	0	0	0	0	1	undefined	58e3992a5ba4cb100097f7d0
	false	undefined	0							undefined	0	58e39aa45ba4cb100097fa8d		false	377865	730	113	0	0	0	0	1	undefined	58e3992a5ba4cb100097f7d0
	false	undefined	0							undefined	0	58e39aa45ba4cb100097fa8e		false	378413	731	112	0	0	0	0	1	undefined	58e3992a5ba4cb100097f7d0
	false	undefined	0							undefined	0	58e39aa55ba4cb100097fa8f		false	378882	732	112	0	0	0	0	1	undefined	58e3992a5ba4cb100097f7d0
	false	undefined	0							undefined	0	58e39aa55ba4cb100097fa90		false	379407	733	110	0	0	0	0	1	undefined	58e3992a5ba4cb100097f7d0
	false	undefined	0							undefined	0	58e39aa65ba4cb100097fa91		false	379949	734	112	0	0	0	0	1	undefined	58e3992a5ba4cb100097f7d0
	false	undefined	0							undefined	0	58e39aa65ba4cb100097fa92		false	380545	735	116	0	0	0	0	1	undefined	58e3992a5ba4cb100097f7d0
	false	undefined	0							undefined	0	58e39aa75ba4cb100097fa93		false	381000	736	114	0	0	0	0	1	undefined	58e3992a5ba4cb100097f7d0
	false	undefined	0							undefined	0	58e39aa75ba4cb100097fa94		false	381550	737	115	0	0	0	0	1	undefined	58e3992a5ba4cb100097f7d0
	false	undefined	0							undefined	0	58e39aa85ba4cb100097fa95		false	382027	738	113	0	0	0	0	1	undefined	58e3992a5ba4cb100097f7d0
	false	undefined	0							undefined	0	58e39aa85ba4cb100097fa96		false	382539	739	113	0	0	0	0	1	undefined	58e3992a5ba4cb100097f7d0
	false	undefined	0							undefined	0	58e39aa95ba4cb100097fa97		false	383079	740	117	0	0	0	0	1	undefined	58e3992a5ba4cb100097f7d0
	false	undefined	0							undefined	0	58e39aa95ba4cb100097fa98		false	383609	741	118	0	0	0	0	1	undefined	58e3992a5ba4cb100097f7d0
	false	undefined	0							undefined	0	58e39aaa5ba4cb100097fa99		false	384136	742	115	0	0	0	0	1	undefined	58e3992a5ba4cb100097f7d0
	false	undefined	0							undefined	0	58e39aaa5ba4cb100097fa9a		false	384602	743	108	0	0	0	0	1	undefined	58e3992a5ba4cb100097f7d0
	false	undefined	0							undefined	0	58e39aab5ba4cb100097fa9b		false	385144	744	107	0	0	0	0	1	undefined	58e3992a5ba4cb100097f7d0
	false	undefined	0							undefined	0	58e39aac5ba4cb100097fa9c		false	385689	745	109	0	0	0	0	1	undefined	58e3992a5ba4cb100097f7d0
	false	undefined	0							undefined	0	58e39aac5ba4cb100097fa9d		false	386221	746	109	0	0	0	0	1	undefined	58e3992a5ba4cb100097f7d0
	false	undefined	0							undefined	0	58e39aad5ba4cb100097fa9e		false	386750	747	111	0	0	0	0	1	undefined	58e3992a5ba4cb100097f7d0
	false	undefined	0							undefined	0	58e39aad5ba4cb100097fa9f		false	387224	748	109	0	0	0	0	1	undefined	58e3992a5ba4cb100097f7d0
	false	undefined	0							undefined	0	58e39aae5ba4cb100097faa0		false	387817	749	111	0	0	0	0	1	undefined	58e3992a5ba4cb100097f7d0
	false	undefined	0							undefined	0	58e39aae5ba4cb100097faa1		false	388348	750	110	0	0	0	0	1	undefined	58e3992a5ba4cb100097f7d0
	false	undefined	0							undefined	0	58e39aaf5ba4cb100097faa2		false	388902	751	112	0	0	0	0	1	undefined	58e3992a5ba4cb100097f7d0
	false	undefined	0							undefined	0	58e39aaf5ba4cb100097faa3		false	389420	752	114	0	0	0	0	1	undefined	58e3992a5ba4cb100097f7d0
	false	undefined	0							undefined	0	58e39ab05ba4cb100097faa4		false	389969	753	114	0	0	0	0	1	undefined	58e3992a5ba4cb100097f7d0
	false	undefined	0							undefined	0	58e39ab05ba4cb100097faa5		false	390507	754	114	0	0	0	0	1	undefined	58e3992a5ba4cb100097f7d0
	false	undefined	0							undefined	0	58e39ab15ba4cb100097faa6		false	390967	755	113	0	0	0	0	1	undefined	58e3992a5ba4cb100097f7d0
	false	undefined	0							undefined	0	58e39ab15ba4cb100097faa7		false	391573	756	114	0	0	0	0	1	undefined	58e3992a5ba4cb100097f7d0
	false	undefined	0							undefined	0	58e39ab25ba4cb100097faa8		false	392030	757	112	0	0	0	0	1	undefined	58e3992a5ba4cb100097f7d0
	false	undefined	0							undefined	0	58e39ab25ba4cb100097faa9		false	392571	758	115	0	0	0	0	1	undefined	58e3992a5ba4cb100097f7d0
	false	undefined	0							undefined	0	58e39ab35ba4cb100097faaa		false	393110	759	116	0	0	0	0	1	undefined	58e3992a5ba4cb100097f7d0
	false	undefined	0							undefined	0	58e39ab35ba4cb100097faab		false	393551	760	113	0	0	0	0	1	undefined	58e3992a5ba4cb100097f7d0
	false	undefined	0							undefined	0	58e39ab45ba4cb100097faac		false	394097	761	112	0	0	0	0	1	undefined	58e3992a5ba4cb100097f7d0
	false	undefined	0							undefined	0	58e39ab55ba4cb100097faad		false	394645	762	109	0	0	0	0	1	undefined	58e3992a5ba4cb100097f7d0
	false	undefined	0							undefined	0	58e39ab55ba4cb100097faae		false	395162	763	108	0	0	0	0	1	undefined	58e3992a5ba4cb100097f7d0
	false	undefined	0							undefined	0	58e39ab65ba4cb100097faaf		false	395709	764	106	0	0	0	0	1	undefined	58e3992a5ba4cb100097f7d0
	false	undefined	0							undefined	0	58e39ab65ba4cb100097fab0		false	396221	765	106	0	0	0	0	1	undefined	58e3992a5ba4cb100097f7d0
	false	undefined	0							undefined	0	58e39ab75ba4cb100097fab1		false	396708	766	109	0	0	0	0	1	undefined	58e3992a5ba4cb100097f7d0
	false	undefined	0							undefined	0	58e39ab75ba4cb100097fab2		false	397322	767	111	0	0	0	0	1	undefined	58e3992a5ba4cb100097f7d0
	false	undefined	0							undefined	0	58e39ab85ba4cb100097fab3		false	397832	768	113	0	0	0	0	1	undefined	58e3992a5ba4cb100097f7d0
	false	undefined	0							undefined	0	58e39ab85ba4cb100097fab4		false	398372	769	111	0	0	0	0	1	undefined	58e3992a5ba4cb100097f7d0
	false	undefined	0							undefined	0	58e39ab95ba4cb100097fab5		false	398913	770	109	0	0	0	0	1	undefined	58e3992a5ba4cb100097f7d0
	false	undefined	0							undefined	0	58e39ab95ba4cb100097fab6		false	399526	771	110	0	0	0	0	1	undefined	58e3992a5ba4cb100097f7d0
	false	undefined	0							undefined	0	58e39aba5ba4cb100097fab7		false	400039	772	112	0	0	0	0	1	undefined	58e3992a5ba4cb100097f7d0
	false	undefined	0							undefined	0	58e39aba5ba4cb100097fab8		false	400573	773	111	0	0	0	0	1	undefined	58e3992a5ba4cb100097f7d0
	false	undefined	0							undefined	0	58e39abb5ba4cb100097fab9		false	401178	774	110	0	0	0	0	1	undefined	58e3992a5ba4cb100097f7d0
	false	undefined	0							undefined	0	58e39abb5ba4cb100097faba		false	401634	775	109	0	0	0	0	1	undefined	58e3992a5ba4cb100097f7d0
	false	undefined	0							undefined	0	58e39abc5ba4cb100097fabb		false	402240	776	110	0	0	0	0	1	undefined	58e3992a5ba4cb100097f7d0
	false	undefined	0							undefined	0	58e39abd5ba4cb100097fabc		false	402792	777	109	0	0	0	0	1	undefined	58e3992a5ba4cb100097f7d0
	false	undefined	0							undefined	0	58e39abd5ba4cb100097fabd		false	403320	778	110	0	0	0	0	1	undefined	58e3992a5ba4cb100097f7d0
	false	undefined	0							undefined	0	58e39abe5ba4cb100097fabe		false	403786	779	109	0	0	0	0	1	undefined	58e3992a5ba4cb100097f7d0
	false	undefined	0							undefined	0	58e39abe5ba4cb100097fabf		false	404385	780	110	0	0	0	0	1	undefined	58e3992a5ba4cb100097f7d0
	false	undefined	0							undefined	0	58e39abf5ba4cb100097fac0		false	404920	781	114	0	0	0	0	1	undefined	58e3992a5ba4cb100097f7d0
	false	undefined	0							undefined	0	58e39abf5ba4cb100097fac1		false	405472	782	112	0	0	0	0	1	undefined	58e3992a5ba4cb100097f7d0
	false	undefined	0							undefined	0	58e39ac05ba4cb100097fac2		false	406052	783	110	0	0	0	0	1	undefined	58e3992a5ba4cb100097f7d0
	false	undefined	0							undefined	0	58e39ac05ba4cb100097fac3		false	406594	784	109	0	0	0	0	1	undefined	58e3992a5ba4cb100097f7d0
	false	undefined	0							undefined	0	58e39ac15ba4cb100097fac4		false	407123	785	110	0	0	0	0	1	undefined	58e3992a5ba4cb100097f7d0
	false	undefined	0							undefined	0	58e39ac25ba4cb100097fac5		false	407654	786	111	0	0	0	0	1	undefined	58e3992a5ba4cb100097f7d0
	false	undefined	0							undefined	0	58e39ac25ba4cb100097fac6		false	408134	787	111	0	0	0	0	1	undefined	58e3992a5ba4cb100097f7d0
	false	undefined	0							undefined	0	58e39ac35ba4cb100097fac7		false	408711	788	115	0	0	0	0	1	undefined	58e3992a5ba4cb100097f7d0
	false	undefined	0							undefined	0	58e39ac35ba4cb100097fac8		false	409267	789	111	0	0	0	0	1	undefined	58e3992a5ba4cb100097f7d0
	false	undefined	0							undefined	0	58e39ac45ba4cb100097fac9		false	409813	790	109	0	0	0	0	1	undefined	58e3992a5ba4cb100097f7d0
	false	undefined	0							undefined	0	58e39ac45ba4cb100097faca		false	410317	791	110	0	0	0	0	1	undefined	58e3992a5ba4cb100097f7d0
	false	undefined	0							undefined	0	58e39ac55ba4cb100097facb		false	410855	792	113	0	0	0	0	1	undefined	58e3992a5ba4cb100097f7d0
	false	undefined	0							undefined	0	58e39ac55ba4cb100097facc		false	411330	793	115	0	0	0	0	1	undefined	58e3992a5ba4cb100097f7d0
	false	undefined	0							undefined	0	58e39ac65ba4cb100097facd		false	411936	794	115	0	0	0	0	1	undefined	58e3992a5ba4cb100097f7d0
	false	undefined	0							undefined	0	58e39ac65ba4cb100097face		false	412477	795	117	0	0	0	0	1	undefined	58e3992a5ba4cb100097f7d0
	false	undefined	0							undefined	0	58e39ac75ba4cb100097facf		false	412988	796	116	0	0	0	0	1	undefined	58e3992a5ba4cb100097f7d0
	false	undefined	0							undefined	0	58e39ac75ba4cb100097fad0		false	413483	797	115	0	0	0	0	1	undefined	58e3992a5ba4cb100097f7d0
	false	undefined	0							undefined	0	58e39ac85ba4cb100097fad1		false	414056	798	113	0	0	0	0	1	undefined	58e3992a5ba4cb100097f7d0
	false	undefined	0							undefined	0	58e39ac85ba4cb100097fad2		false	414557	799	113	0	0	0	0	1	undefined	58e3992a5ba4cb100097f7d0
	false	undefined	0							undefined	0	58e39ac95ba4cb100097fad3		false	415137	800	112	0	0	0	0	1	undefined	58e3992a5ba4cb100097f7d0
	false	undefined	0							undefined	0	58e39aca5ba4cb100097fad4		false	415664	801	112	0	0	0	0	1	undefined	58e3992a5ba4cb100097f7d0
	false	undefined	0							undefined	0	58e39aca5ba4cb100097fad5		false	416156	802	111	0	0	0	0	1	undefined	58e3992a5ba4cb100097f7d0
	false	undefined	0							undefined	0	58e39acb5ba4cb100097fad6		false	416674	803	111	0	0	0	0	1	undefined	58e3992a5ba4cb100097f7d0
	false	undefined	0							undefined	0	58e39acb5ba4cb100097fad7		false	417211	804	113	0	0	0	0	1	undefined	58e3992a5ba4cb100097f7d0
	false	undefined	0							undefined	0	58e39acc5ba4cb100097fad8		false	417696	805	111	0	0	0	0	1	undefined	58e3992a5ba4cb100097f7d0
	false	undefined	0							undefined	0	58e39acc5ba4cb100097fad9		false	418210	806	112	0	0	0	0	1	undefined	58e3992a5ba4cb100097f7d0
	false	undefined	0							undefined	0	58e39acd5ba4cb100097fada		false	418826	807	111	0	0	0	0	1	undefined	58e3992a5ba4cb100097f7d0
	false	undefined	0							undefined	0	58e39acd5ba4cb100097fadb		false	419349	808	112	0	0	0	0	1	undefined	58e3992a5ba4cb100097f7d0
	false	undefined	0							undefined	0	58e39ace5ba4cb100097fadc		false	419901	809	113	0	0	0	0	1	undefined	58e3992a5ba4cb100097f7d0
	false	undefined	0							undefined	0	58e39ace5ba4cb100097fadd		false	420424	810	110	0	0	0	0	1	undefined	58e3992a5ba4cb100097f7d0
	false	undefined	0							undefined	0	58e39acf5ba4cb100097fade		false	421018	811	111	0	0	0	0	1	undefined	58e3992a5ba4cb100097f7d0
	false	undefined	0							undefined	0	58e39acf5ba4cb100097fadf		false	421553	812	110	0	0	0	0	1	undefined	58e3992a5ba4cb100097f7d0
	false	undefined	0							undefined	0	58e39ad05ba4cb100097fae0		false	422149	813	113	0	0	0	0	1	undefined	58e3992a5ba4cb100097f7d0
	false	undefined	0							undefined	0	58e39ad05ba4cb100097fae1		false	422584	814	113	0	0	0	0	1	undefined	58e3992a5ba4cb100097f7d0
	false	undefined	0							undefined	0	58e39ad15ba4cb100097fae2		false	423091	815	112	0	0	0	0	1	undefined	58e3992a5ba4cb100097f7d0
	false	undefined	0							undefined	0	58e39ad25ba4cb100097fae3		false	423702	816	113	0	0	0	0	1	undefined	58e3992a5ba4cb100097f7d0
	false	undefined	0							undefined	0	58e39ad25ba4cb100097fae4		false	424230	817	111	0	0	0	0	1	undefined	58e3992a5ba4cb100097f7d0
	false	undefined	0							undefined	0	58e39ad35ba4cb100097fae5		false	424761	818	111	0	0	0	0	1	undefined	58e3992a5ba4cb100097f7d0
	false	undefined	0							undefined	0	58e39ad35ba4cb100097fae6		false	425287	819	110	0	0	0	0	1	undefined	58e3992a5ba4cb100097f7d0
	false	undefined	0							undefined	0	58e39ad45ba4cb100097fae7		false	425776	820	112	0	0	0	0	1	undefined	58e3992a5ba4cb100097f7d0
	false	undefined	0							undefined	0	58e39ad45ba4cb100097fae8		true	426316	821	112	0	0	0	0	1	undefined	58e3992a5ba4cb100097f7d0
	false	undefined	0							undefined	0	58e39ad55ba4cb100097fae9		true	426831	822	-1	0	0	0	0	1	undefined	58e3992a5ba4cb100097f7d0
	false	undefined	0							undefined	0	58e39ad55ba4cb100097faea		true	427357	823	-1	0	0	0	0	1	undefined	58e3992a5ba4cb100097f7d0
	false	undefined	0							undefined	0	58e39ad65ba4cb100097faeb		true	428036	824	-1	0	0	0	0	1	undefined	58e3992a5ba4cb100097f7d0
	false	undefined	0							undefined	0	58e39ad65ba4cb100097faec		true	428493	828	-1	0	0	0	0	1	undefined	58e3992a5ba4cb100097f7d0
	false	undefined	0							undefined	0	58e39ad75ba4cb100097faed		true	429029	829	-1	0	0	0	0	1	undefined	58e3992a5ba4cb100097f7d0
	false	undefined	0							undefined	0	58e39ad75ba4cb100097faee		true	429577	830	-1	0	0	0	0	1	undefined	58e3992a5ba4cb100097f7d0
	false	undefined	0							undefined	0	58e39ad85ba4cb100097faef		true	430089	831	-1	0	0	0	0	1	undefined	58e3992a5ba4cb100097f7d0
	false	undefined	0							undefined	0	58e39ad95ba4cb100097faf0		true	430641	832	-1	0	0	0	0	1	undefined	58e3992a5ba4cb100097f7d0
	false	undefined	0							undefined	0	58e39ad95ba4cb100097faf1		false	431162	833	-1	0	0	0	0	1	undefined	58e3992a5ba4cb100097f7d0
	false	undefined	0							undefined	0	58e39ada5ba4cb100097faf2		false	431783	834	-1	0	0	0	0	1	undefined	58e3992a5ba4cb100097f7d0
	false	undefined	0							undefined	0	58e39ada5ba4cb100097faf3		true	432293	835	-1	0	0	0	0	1	undefined	58e3992a5ba4cb100097f7d0
	false	undefined	0							undefined	0	58e39adb5ba4cb100097faf4		true	432842	839	72	0	0	0	0	1	undefined	58e3992a5ba4cb100097f7d0
	false	undefined	0							undefined	0	58e39adb5ba4cb100097faf5		true	433392	840	72	0	0	0	0	1	undefined	58e3992a5ba4cb100097f7d0
	false	undefined	0							undefined	0	58e39adc5ba4cb100097faf6		false	433865	841	-1	0	0	0	0	1	undefined	58e3992a5ba4cb100097f7d0
	false	undefined	0							undefined	0	58e39adc5ba4cb100097faf7		false	434441	842	-1	0	0	0	0	1	undefined	58e3992a5ba4cb100097f7d0
	false	undefined	0							undefined	0	58e39add5ba4cb100097faf8		false	434979	843	-1	0	0	0	0	1	undefined	58e3992a5ba4cb100097f7d0
	false	undefined	0							undefined	0	58e39add5ba4cb100097faf9		true	435504	844	-1	0	0	0	0	1	undefined	58e3992a5ba4cb100097f7d0
	false	undefined	0							undefined	0	58e39ade5ba4cb100097fafa		true	435979	845	-1	0	0	0	0	1	undefined	58e3992a5ba4cb100097f7d0
	false	undefined	0							undefined	0	58e39ade5ba4cb100097fafb		true	436583	846	-1	0	0	0	0	1	undefined	58e3992a5ba4cb100097f7d0
	false	undefined	0							undefined	0	58e39adf5ba4cb100097fafc		true	437117	847	-1	0	0	0	0	1	undefined	58e3992a5ba4cb100097f7d0
	false	undefined	0							undefined	0	58e39ae05ba4cb100097fafd		true	437711	848	-1	0	0	0	0	1	undefined	58e3992a5ba4cb100097f7d0
	false	undefined	0							undefined	0	58e39ae05ba4cb100097fafe		true	438204	849	-1	0	0	0	0	1	undefined	58e3992a5ba4cb100097f7d0
	false	undefined	0							undefined	0	58e39ae15ba4cb100097faff		true	438807	850	-1	0	0	0	0	1	undefined	58e3992a5ba4cb100097f7d0
	false	undefined	0							undefined	0	58e39ae15ba4cb100097fb00		true	439325	851	-1	0	0	0	0	1	undefined	58e3992a5ba4cb100097f7d0
	false	undefined	0							undefined	0	58e39ae25ba4cb100097fb01		true	439806	852	-1	0	0	0	0	1	undefined	58e3992a5ba4cb100097f7d0
	false	undefined	0							undefined	0	58e39ae25ba4cb100097fb02		true	440390	853	-1	0	0	0	0	1	undefined	58e3992a5ba4cb100097f7d0
	false	undefined	0							undefined	0	58e39ae35ba4cb100097fb03		true	440922	854	-1	0	0	0	0	1	undefined	58e3992a5ba4cb100097f7d0
	false	undefined	0							undefined	0	58e39ae35ba4cb100097fb04		false	441471	858	-1	0	0	0	0	1	undefined	58e3992a5ba4cb100097f7d0
	false	undefined	0							undefined	0	58e39ae45ba4cb100097fb05		false	442011	859	-1	0	0	0	0	1	undefined	58e3992a5ba4cb100097f7d0
	false	undefined	0							undefined	0	58e39ae45ba4cb100097fb06		true	442512	860	-1	0	0	0	0	1	undefined	58e3992a5ba4cb100097f7d0
	false	undefined	0							undefined	0	58e39ae55ba4cb100097fb07		true	442996	861	-1	0	0	0	0	1	undefined	58e3992a5ba4cb100097f7d0
	false	undefined	0							undefined	0	58e39ae55ba4cb100097fb08		true	443595	862	70	0	0	0	0	1	undefined	58e3992a5ba4cb100097f7d0
	false	undefined	0							undefined	0	58e39ae65ba4cb100097fb09		true	444127	863	70	0	0	0	0	1	undefined	58e3992a5ba4cb100097f7d0
	false	undefined	0							undefined	0	58e39ae65ba4cb100097fb0a		true	444613	864	70	0	0	0	0	1	undefined	58e3992a5ba4cb100097f7d0
	false	undefined	0							undefined	0	58e39ae75ba4cb100097fb0b		true	445135	865	-1	0	0	0	0	1	undefined	58e3992a5ba4cb100097f7d0
	false	undefined	0							undefined	0	58e39ae85ba4cb100097fb0c		false	445742	866	-1	0	0	0	0	1	undefined	58e3992a5ba4cb100097f7d0
	false	undefined	0							undefined	0	58e39ae85ba4cb100097fb0d		false	446263	867	-1	0	0	0	0	1	undefined	58e3992a5ba4cb100097f7d0
	false	undefined	0							undefined	0	58e39ae95ba4cb100097fb0e		true	446770	868	96	0	0	0	0	1	undefined	58e3992a5ba4cb100097f7d0
	false	undefined	0							undefined	0	58e39ae95ba4cb100097fb0f		true	447338	869	93	0	0	0	0	1	undefined	58e3992a5ba4cb100097f7d0
	false	undefined	0							undefined	0	58e39aea5ba4cb100097fb10		true	447867	870	93	0	0	0	0	1	undefined	58e3992a5ba4cb100097f7d0
	false	undefined	0							undefined	0	58e39aea5ba4cb100097fb11		true	448366	871	-1	0	0	0	0	1	undefined	58e3992a5ba4cb100097f7d0
	false	undefined	0							undefined	0	58e39aeb5ba4cb100097fb12		true	448932	872	-1	0	0	0	0	1	undefined	58e3992a5ba4cb100097f7d0
	false	undefined	0							undefined	0	58e39aeb5ba4cb100097fb13		true	449418	873	-1	0	0	0	0	1	undefined	58e3992a5ba4cb100097f7d0
	false	undefined	0							undefined	0	58e39aec5ba4cb100097fb14		true	449961	877	-1	0	0	0	0	1	undefined	58e3992a5ba4cb100097f7d0
	false	undefined	0							undefined	0	58e39aec5ba4cb100097fb15		true	450475	878	-1	0	0	0	0	1	undefined	58e3992a5ba4cb100097f7d0
	false	undefined	0							undefined	0	58e39aed5ba4cb100097fb16		true	451021	879	-1	0	0	0	0	1	undefined	58e3992a5ba4cb100097f7d0
	false	undefined	0							undefined	0	58e39aed5ba4cb100097fb17		true	451558	880	-1	0	0	0	0	1	undefined	58e3992a5ba4cb100097f7d0
	false	undefined	0							undefined	0	58e39aee5ba4cb100097fb18		true	452080	881	-1	0	0	0	0	1	undefined	58e3992a5ba4cb100097f7d0
	false	undefined	0							undefined	0	58e39aee5ba4cb100097fb19		false	452594	882	-1	0	0	0	0	1	undefined	58e3992a5ba4cb100097f7d0
	false	undefined	0							undefined	0	58e39aef5ba4cb100097fb1a		false	453147	883	-1	0	0	0	0	1	undefined	58e3992a5ba4cb100097f7d0
	false	undefined	0							undefined	0	58e39af05ba4cb100097fb1b		true	453683	884	-1	0	0	0	0	1	undefined	58e3992a5ba4cb100097f7d0
	false	undefined	0							undefined	0	58e39af05ba4cb100097fb1c		true	454221	885	-1	0	0	0	0	1	undefined	58e3992a5ba4cb100097f7d0
	false	undefined	0							undefined	0	58e39af15ba4cb100097fb1d		true	454748	886	-1	0	0	0	0	1	undefined	58e3992a5ba4cb100097f7d0
	false	undefined	0							undefined	0	58e39af15ba4cb100097fb1e		false	455307	887	93	0	0	0	0	1	undefined	58e3992a5ba4cb100097f7d0
	false	undefined	0							undefined	0	58e39af25ba4cb100097fb1f		true	455833	888	-1	0	0	0	0	1	undefined	58e3992a5ba4cb100097f7d0
	false	undefined	0							undefined	0	58e39af25ba4cb100097fb20		true	456433	889	-1	0	0	0	0	1	undefined	58e3992a5ba4cb100097f7d0
	false	undefined	0							undefined	0	58e39af35ba4cb100097fb21		false	456952	893	97	0	0	0	0	1	undefined	58e3992a5ba4cb100097f7d0
	false	undefined	0							undefined	0	58e39af35ba4cb100097fb22		false	457506	894	105	0	0	0	0	1	undefined	58e3992a5ba4cb100097f7d0
	false	undefined	0							undefined	0	58e39af45ba4cb100097fb23		false	457958	895	109	0	0	0	0	1	undefined	58e3992a5ba4cb100097f7d0
	false	undefined	0							undefined	0	58e39af45ba4cb100097fb24		false	458491	896	112	0	0	0	0	1	undefined	58e3992a5ba4cb100097f7d0
	false	undefined	0							undefined	0	58e39af55ba4cb100097fb25		false	459036	897	111	0	0	0	0	1	undefined	58e3992a5ba4cb100097f7d0
	false	undefined	0							undefined	0	58e39af55ba4cb100097fb26		false	459564	898	109	0	0	0	0	1	undefined	58e3992a5ba4cb100097f7d0
	false	undefined	0							undefined	0	58e39af65ba4cb100097fb27		false	460084	899	107	0	0	0	0	1	undefined	58e3992a5ba4cb100097f7d0
	false	undefined	0							undefined	0	58e39af75ba4cb100097fb28		false	460638	900	105	0	0	0	0	1	undefined	58e3992a5ba4cb100097f7d0
	false	undefined	0							undefined	0	58e39af75ba4cb100097fb29		false	461171	901	107	0	0	0	0	1	undefined	58e3992a5ba4cb100097f7d0
	false	undefined	0							undefined	0	58e39af85ba4cb100097fb2a		false	461701	902	108	0	0	0	0	1	undefined	58e3992a5ba4cb100097f7d0
	false	undefined	0							undefined	0	58e39af85ba4cb100097fb2b		false	462249	903	108	0	0	0	0	1	undefined	58e3992a5ba4cb100097f7d0
	false	undefined	0							undefined	0	58e39af95ba4cb100097fb2c		false	462840	904	108	0	0	0	0	1	undefined	58e3992a5ba4cb100097f7d0
	false	undefined	0							undefined	0	58e39af95ba4cb100097fb2d		false	463369	905	106	0	0	0	0	1	undefined	58e3992a5ba4cb100097f7d0
	false	undefined	0							undefined	0	58e39afa5ba4cb100097fb2e		false	463894	906	107	0	0	0	0	1	undefined	58e3992a5ba4cb100097f7d0
	false	undefined	0							undefined	0	58e39afa5ba4cb100097fb2f		false	464467	907	105	0	0	0	0	1	undefined	58e3992a5ba4cb100097f7d0
	false	undefined	0							undefined	0	58e39afb5ba4cb100097fb30		false	464982	908	105	0	0	0	0	1	undefined	58e3992a5ba4cb100097f7d0
	false	undefined	0							undefined	0	58e39afb5ba4cb100097fb31		false	465492	909	108	0	0	0	0	1	undefined	58e3992a5ba4cb100097f7d0
	false	undefined	0							undefined	0	58e39afc5ba4cb100097fb32		false	466045	910	107	0	0	0	0	1	undefined	58e3992a5ba4cb100097f7d0
	false	undefined	0							undefined	0	58e39afc5ba4cb100097fb33		false	466576	911	107	0	0	0	0	1	undefined	58e3992a5ba4cb100097f7d0
	false	undefined	0							undefined	0	58e39afd5ba4cb100097fb34		false	467110	912	105	0	0	0	0	1	undefined	58e3992a5ba4cb100097f7d0
	false	undefined	0							undefined	0	58e39afd5ba4cb100097fb35		false	467586	913	108	0	0	0	0	1	undefined	58e3992a5ba4cb100097f7d0
	false	undefined	0							undefined	0	58e39afe5ba4cb100097fb36		false	468200	914	105	0	0	0	0	1	undefined	58e3992a5ba4cb100097f7d0
	false	undefined	0							undefined	0	58e39aff5ba4cb100097fb37		false	468722	915	106	0	0	0	0	1	undefined	58e3992a5ba4cb100097f7d0
	false	undefined	0							undefined	0	58e39aff5ba4cb100097fb38		false	469244	916	106	0	0	0	0	1	undefined	58e3992a5ba4cb100097f7d0
	false	undefined	0							undefined	0	58e39b005ba4cb100097fb39		false	469791	917	108	0	0	0	0	1	undefined	58e3992a5ba4cb100097f7d0
	false	undefined	0							undefined	0	58e39b005ba4cb100097fb3a		false	470250	918	109	0	0	0	0	1	undefined	58e3992a5ba4cb100097f7d0
	false	undefined	0							undefined	0	58e39b015ba4cb100097fb3b		false	470849	919	110	0	0	0	0	1	undefined	58e3992a5ba4cb100097f7d0
	false	undefined	0							undefined	0	58e39b015ba4cb100097fb3c		false	471335	920	109	0	0	0	0	1	undefined	58e3992a5ba4cb100097f7d0
	false	undefined	0							undefined	0	58e39b025ba4cb100097fb3d		false	471913	921	108	0	0	0	0	1	undefined	58e3992a5ba4cb100097f7d0
	false	undefined	0							undefined	0	58e39b025ba4cb100097fb3e		false	472454	922	106	0	0	0	0	1	undefined	58e3992a5ba4cb100097f7d0
	false	undefined	0							undefined	0	58e39b035ba4cb100097fb3f		false	472985	923	104	0	0	0	0	1	undefined	58e3992a5ba4cb100097f7d0
	false	undefined	0							undefined	0	58e39b035ba4cb100097fb40		false	473527	924	105	0	0	0	0	1	undefined	58e3992a5ba4cb100097f7d0
	false	undefined	0							undefined	0	58e39b045ba4cb100097fb41		false	474043	925	102	0	0	0	0	1	undefined	58e3992a5ba4cb100097f7d0
	false	undefined	0							undefined	0	58e39b055ba4cb100097fb42		false	474672	926	105	0	0	0	0	1	undefined	58e3992a5ba4cb100097f7d0
	false	undefined	0							undefined	0	58e39b055ba4cb100097fb43		false	475189	927	107	0	0	0	0	1	undefined	58e3992a5ba4cb100097f7d0
	false	undefined	0							undefined	0	58e39b065ba4cb100097fb44		false	475719	928	108	0	0	0	0	1	undefined	58e3992a5ba4cb100097f7d0
	false	undefined	0							undefined	0	58e39b065ba4cb100097fb45		false	476265	929	108	0	0	0	0	1	undefined	58e3992a5ba4cb100097f7d0
	false	undefined	0							undefined	0	58e39b075ba4cb100097fb46		false	476809	930	107	0	0	0	0	1	undefined	58e3992a5ba4cb100097f7d0
	false	undefined	0							undefined	0	58e39b075ba4cb100097fb47		false	477327	931	110	0	0	0	0	1	undefined	58e3992a5ba4cb100097f7d0
	false	undefined	0							undefined	0	58e39b085ba4cb100097fb48		false	477862	932	110	0	0	0	0	1	undefined	58e3992a5ba4cb100097f7d0
	false	undefined	0							undefined	0	58e39b085ba4cb100097fb49		false	478413	933	111	0	0	0	0	1	undefined	58e3992a5ba4cb100097f7d0
	false	undefined	0							undefined	0	58e39b095ba4cb100097fb4a		false	478931	934	112	0	0	0	0	1	undefined	58e3992a5ba4cb100097f7d0
	false	undefined	0							undefined	0	58e39b095ba4cb100097fb4b		false	479472	935	113	0	0	0	0	1	undefined	58e3992a5ba4cb100097f7d0
	false	undefined	0							undefined	0	58e39b0a5ba4cb100097fb4c		false	479998	936	113	0	0	0	0	1	undefined	58e3992a5ba4cb100097f7d0
	false	undefined	0							undefined	0	58e39b0a5ba4cb100097fb4d		false	480536	937	112	0	0	0	0	1	undefined	58e3992a5ba4cb100097f7d0
	false	undefined	0							undefined	0	58e39b0b5ba4cb100097fb4e		false	481146	938	113	0	0	0	0	1	undefined	58e3992a5ba4cb100097f7d0
	false	undefined	0							undefined	0	58e39b0c5ba4cb100097fb4f		false	481690	939	112	0	0	0	0	1	undefined	58e3992a5ba4cb100097f7d0
	false	undefined	0							undefined	0	58e39b0c5ba4cb100097fb50		false	482203	940	114	0	0	0	0	1	undefined	58e3992a5ba4cb100097f7d0
	false	undefined	0							undefined	0	58e39b0d5ba4cb100097fb51		false	482743	941	113	0	0	0	0	1	undefined	58e3992a5ba4cb100097f7d0
	false	undefined	0							undefined	0	58e39b0d5ba4cb100097fb52		false	483277	942	113	0	0	0	0	1	undefined	58e3992a5ba4cb100097f7d0
	false	undefined	0							undefined	0	58e39b0e5ba4cb100097fb53		false	483770	943	115	0	0	0	0	1	undefined	58e3992a5ba4cb100097f7d0
	false	undefined	0							undefined	0	58e39b0e5ba4cb100097fb54		false	484339	944	116	0	0	0	0	1	undefined	58e3992a5ba4cb100097f7d0
	false	undefined	0							undefined	0	58e39b0f5ba4cb100097fb55		false	484862	945	116	0	0	0	0	1	undefined	58e3992a5ba4cb100097f7d0
	false	undefined	0							undefined	0	58e39b0f5ba4cb100097fb56		false	485349	946	115	0	0	0	0	1	undefined	58e3992a5ba4cb100097f7d0
	false	undefined	0							undefined	0	58e39b105ba4cb100097fb57		false	485832	947	117	0	0	0	0	1	undefined	58e3992a5ba4cb100097f7d0
	false	undefined	0							undefined	0	58e39b105ba4cb100097fb58		false	486352	948	116	0	0	0	0	1	undefined	58e3992a5ba4cb100097f7d0
	false	undefined	0							undefined	0	58e39b115ba4cb100097fb59		false	486888	949	116	0	0	0	0	1	undefined	58e3992a5ba4cb100097f7d0
	false	undefined	0							undefined	0	58e39b115ba4cb100097fb5a		false	487378	950	116	0	0	0	0	1	undefined	58e3992a5ba4cb100097f7d0
	false	undefined	0							undefined	0	58e39b125ba4cb100097fb5b		false	487878	951	115	0	0	0	0	1	undefined	58e3992a5ba4cb100097f7d0
	false	undefined	0							undefined	0	58e39b125ba4cb100097fb5c		false	488490	952	112	0	0	0	0	1	undefined	58e3992a5ba4cb100097f7d0
	false	undefined	0							undefined	0	58e39b135ba4cb100097fb5d		false	489022	953	112	0	0	0	0	1	undefined	58e3992a5ba4cb100097f7d0
	false	undefined	0							undefined	0	58e39b135ba4cb100097fb5e		false	489565	954	115	0	0	0	0	1	undefined	58e3992a5ba4cb100097f7d0
	false	undefined	0							undefined	0	58e39b145ba4cb100097fb5f		false	490097	955	115	0	0	0	0	1	undefined	58e3992a5ba4cb100097f7d0
	false	undefined	0							undefined	0	58e39b155ba4cb100097fb60		false	490626	956	113	0	0	0	0	1	undefined	58e3992a5ba4cb100097f7d0
	false	undefined	0							undefined	0	58e39b155ba4cb100097fb61		false	491140	957	115	0	0	0	0	1	undefined	58e3992a5ba4cb100097f7d0
	false	undefined	0							undefined	0	58e39b165ba4cb100097fb62		false	491695	958	116	0	0	0	0	1	undefined	58e3992a5ba4cb100097f7d0
	false	undefined	0							undefined	0	58e39b165ba4cb100097fb63		false	492181	959	117	0	0	0	0	1	undefined	58e3992a5ba4cb100097f7d0
	false	undefined	0							undefined	0	58e39b175ba4cb100097fb64		false	492691	960	114	0	0	0	0	1	undefined	58e3992a5ba4cb100097f7d0
	false	undefined	0							undefined	0	58e39b175ba4cb100097fb65		false	493201	961	112	0	0	0	0	1	undefined	58e3992a5ba4cb100097f7d0
	false	undefined	0							undefined	0	58e39b185ba4cb100097fb66		false	493769	962	110	0	0	0	0	1	undefined	58e3992a5ba4cb100097f7d0
	false	undefined	0							undefined	0	58e39b185ba4cb100097fb67		false	494345	963	113	0	0	0	0	1	undefined	58e3992a5ba4cb100097f7d0
	false	undefined	0							undefined	0	58e39b195ba4cb100097fb68		false	494902	964	113	0	0	0	0	1	undefined	58e3992a5ba4cb100097f7d0
	false	undefined	0							undefined	0	58e39b195ba4cb100097fb69		false	495450	965	114	0	0	0	0	1	undefined	58e3992a5ba4cb100097f7d0
	false	undefined	0							undefined	0	58e39b1a5ba4cb100097fb6a		false	495909	966	113	0	0	0	0	1	undefined	58e3992a5ba4cb100097f7d0
	false	undefined	0							undefined	0	58e39b1a5ba4cb100097fb6b		false	496495	967	115	0	0	0	0	1	undefined	58e3992a5ba4cb100097f7d0
	false	undefined	0							undefined	0	58e39b1b5ba4cb100097fb6c		false	496965	968	115	0	0	0	0	1	undefined	58e3992a5ba4cb100097f7d0
	false	undefined	0							undefined	0	58e39b1b5ba4cb100097fb6d		false	497510	969	115	0	0	0	0	1	undefined	58e3992a5ba4cb100097f7d0
	false	undefined	0							undefined	0	58e39b1c5ba4cb100097fb6e		false	498045	970	116	0	0	0	0	1	undefined	58e3992a5ba4cb100097f7d0
	false	undefined	0							undefined	0	58e39b1c5ba4cb100097fb6f		false	498587	971	115	0	0	0	0	1	undefined	58e3992a5ba4cb100097f7d0
	false	undefined	0							undefined	0	58e39b1d5ba4cb100097fb70		false	499111	972	116	0	0	0	0	1	undefined	58e3992a5ba4cb100097f7d0
	false	undefined	0							undefined	0	58e39b1e5ba4cb100097fb71		false	499640	973	115	0	0	0	0	1	undefined	58e3992a5ba4cb100097f7d0
	false	undefined	0							undefined	0	58e39b1e5ba4cb100097fb72		false	500204	974	118	0	0	0	0	1	undefined	58e3992a5ba4cb100097f7d0
	false	undefined	0							undefined	0	58e39b1f5ba4cb100097fb73		false	500708	975	114	0	0	0	0	1	undefined	58e3992a5ba4cb100097f7d0
	false	undefined	0							undefined	0	58e39b1f5ba4cb100097fb74		false	501327	976	117	0	0	0	0	1	undefined	58e3992a5ba4cb100097f7d0
	false	undefined	0							undefined	0	58e39b205ba4cb100097fb75		false	501863	977	115	0	0	0	0	1	undefined	58e3992a5ba4cb100097f7d0
	false	undefined	0							undefined	0	58e39b205ba4cb100097fb76		false	502389	978	116	0	0	0	0	1	undefined	58e3992a5ba4cb100097f7d0
	false	undefined	0							undefined	0	58e39b215ba4cb100097fb77		false	502920	979	116	0	0	0	0	1	undefined	58e3992a5ba4cb100097f7d0
	false	undefined	0							undefined	0	58e39b215ba4cb100097fb78		false	503395	980	115	0	0	0	0	1	undefined	58e3992a5ba4cb100097f7d0
	false	undefined	0							undefined	0	58e39b225ba4cb100097fb79		false	503919	981	116	0	0	0	0	1	undefined	58e3992a5ba4cb100097f7d0
	false	undefined	0							undefined	0	58e39b225ba4cb100097fb7a		false	504448	982	114	0	0	0	0	1	undefined	58e3992a5ba4cb100097f7d0
	false	undefined	0							undefined	0	58e39b235ba4cb100097fb7b		false	505052	983	117	0	0	0	0	1	undefined	58e3992a5ba4cb100097f7d0
	false	undefined	0							undefined	0	58e39b235ba4cb100097fb7c		false	505585	984	118	0	0	0	0	1	undefined	58e3992a5ba4cb100097f7d0
	false	undefined	0							undefined	0	58e39b245ba4cb100097fb7d		false	506033	985	114	0	0	0	0	1	undefined	58e3992a5ba4cb100097f7d0
	false	undefined	0							undefined	0	58e39b245ba4cb100097fb7e		false	506598	986	115	0	0	0	0	1	undefined	58e3992a5ba4cb100097f7d0
	false	undefined	0							undefined	0	58e39b255ba4cb100097fb7f		false	507130	987	118	0	0	0	0	1	undefined	58e3992a5ba4cb100097f7d0
	false	undefined	0							undefined	0	58e39b265ba4cb100097fb80		false	507662	988	119	0	0	0	0	1	undefined	58e3992a5ba4cb100097f7d0
	false	undefined	0							undefined	0	58e39b265ba4cb100097fb81		false	508198	989	118	0	0	0	0	1	undefined	58e3992a5ba4cb100097f7d0
	false	undefined	0							undefined	0	58e39b275ba4cb100097fb82		false	508706	990	117	0	0	0	0	1	undefined	58e3992a5ba4cb100097f7d0
	false	undefined	0							undefined	0	58e39b275ba4cb100097fb83		false	509184	991	117	0	0	0	0	1	undefined	58e3992a5ba4cb100097f7d0
	false	undefined	0							undefined	0	58e39b285ba4cb100097fb84		false	509719	992	116	0	0	0	0	1	undefined	58e3992a5ba4cb100097f7d0
	false	undefined	0							undefined	0	58e39b285ba4cb100097fb85		false	510183	993	112	0	0	0	0	1	undefined	58e3992a5ba4cb100097f7d0
	false	undefined	0							undefined	0	58e39b295ba4cb100097fb86		false	510810	994	113	0	0	0	0	1	undefined	58e3992a5ba4cb100097f7d0
	false	undefined	0							undefined	0	58e39b295ba4cb100097fb87		false	511340	995	114	0	0	0	0	1	undefined	58e3992a5ba4cb100097f7d0
	false	undefined	0							undefined	0	58e39b2a5ba4cb100097fb88		false	511936	996	114	0	0	0	0	1	undefined	58e3992a5ba4cb100097f7d0
	false	undefined	0							undefined	0	58e39b2a5ba4cb100097fb89		false	512468	997	115	0	0	0	0	1	undefined	58e3992a5ba4cb100097f7d0
	false	undefined	0							undefined	0	58e39b2b5ba4cb100097fb8a		false	512949	998	113	0	0	0	0	1	undefined	58e3992a5ba4cb100097f7d0
	false	undefined	0							undefined	0	58e39b2b5ba4cb100097fb8b		false	513530	999	114	0	0	0	0	1	undefined	58e3992a5ba4cb100097f7d0
	false	undefined	0							undefined	0	58e39b2c5ba4cb100097fb8c		false	514069	1000	114	0	0	0	0	1	undefined	58e3992a5ba4cb100097f7d0
	false	undefined	0							undefined	0	58e39b2c5ba4cb100097fb8d		false	514600	1001	116	0	0	0	0	1	undefined	58e3992a5ba4cb100097f7d0
	false	undefined	0							undefined	0	58e39b2d5ba4cb100097fb8e		false	515143	1002	117	0	0	0	0	1	undefined	58e3992a5ba4cb100097f7d0
	false	undefined	0							undefined	0	58e39b2e5ba4cb100097fb8f		false	515679	1003	116	0	0	0	0	1	undefined	58e3992a5ba4cb100097f7d0
	false	undefined	0							undefined	0	58e39b2e5ba4cb100097fb90		false	516212	1004	114	0	0	0	0	1	undefined	58e3992a5ba4cb100097f7d0
	false	undefined	0							undefined	0	58e39b2f5ba4cb100097fb91		false	516738	1005	115	0	0	0	0	1	undefined	58e3992a5ba4cb100097f7d0
	false	undefined	0							undefined	0	58e39b2f5ba4cb100097fb92		false	517289	1006	115	0	0	0	0	1	undefined	58e3992a5ba4cb100097f7d0
	false	undefined	0							undefined	0	58e39b305ba4cb100097fb93		false	517820	1007	116	0	0	0	0	1	undefined	58e3992a5ba4cb100097f7d0
	false	undefined	0							undefined	0	58e39b305ba4cb100097fb94		false	518330	1008	117	0	0	0	0	1	undefined	58e3992a5ba4cb100097f7d0
	false	undefined	0							undefined	0	58e39b315ba4cb100097fb95		false	518830	1009	115	0	0	0	0	1	undefined	58e3992a5ba4cb100097f7d0
	false	undefined	0							undefined	0	58e39b315ba4cb100097fb96		false	519441	1010	113	0	0	0	0	1	undefined	58e3992a5ba4cb100097f7d0
	false	undefined	0							undefined	0	58e39b325ba4cb100097fb97		false	520027	1011	115	0	0	0	0	1	undefined	58e3992a5ba4cb100097f7d0
	false	undefined	0							undefined	0	58e39b325ba4cb100097fb98		false	520554	1012	116	0	0	0	0	1	undefined	58e3992a5ba4cb100097f7d0
	false	undefined	0							undefined	0	58e39b335ba4cb100097fb99		false	521088	1013	115	0	0	0	0	1	undefined	58e3992a5ba4cb100097f7d0
	false	undefined	0							undefined	0	58e39b335ba4cb100097fb9a		false	521619	1014	113	0	0	0	0	1	undefined	58e3992a5ba4cb100097f7d0
	false	undefined	0							undefined	0	58e39b345ba4cb100097fb9b		false	522219	1015	116	0	0	0	0	1	undefined	58e3992a5ba4cb100097f7d0
	false	undefined	0							undefined	0	58e39b355ba4cb100097fb9c		false	522671	1016	116	0	0	0	0	1	undefined	58e3992a5ba4cb100097f7d0
	false	undefined	0							undefined	0	58e39b355ba4cb100097fb9d		false	523223	1017	116	0	0	0	0	1	undefined	58e3992a5ba4cb100097f7d0
	false	undefined	0							undefined	0	58e39b365ba4cb100097fb9e		false	523745	1018	117	0	0	0	0	1	undefined	58e3992a5ba4cb100097f7d0
	false	undefined	0							undefined	0	58e39b365ba4cb100097fb9f		false	524291	1019	116	0	0	0	0	1	undefined	58e3992a5ba4cb100097f7d0
	false	undefined	0							undefined	0	58e39b375ba4cb100097fba0		false	524844	1020	118	0	0	0	0	1	undefined	58e3992a5ba4cb100097f7d0
	false	undefined	0							undefined	0	58e39b375ba4cb100097fba1		false	525307	1021	116	0	0	0	0	1	undefined	58e3992a5ba4cb100097f7d0
	false	undefined	0							undefined	0	58e39b385ba4cb100097fba2		false	525900	1022	116	0	0	0	0	1	undefined	58e3992a5ba4cb100097f7d0
	false	undefined	0							undefined	0	58e39b385ba4cb100097fba3		false	526446	1023	115	0	0	0	0	1	undefined	58e3992a5ba4cb100097f7d0
	false	undefined	0							undefined	0	58e39b395ba4cb100097fba4		false	527047	1024	118	0	0	0	0	1	undefined	58e3992a5ba4cb100097f7d0
	false	undefined	0							undefined	0	58e39b395ba4cb100097fba5		false	527571	1025	118	0	0	0	0	1	undefined	58e3992a5ba4cb100097f7d0
	false	undefined	0							undefined	0	58e39b3a5ba4cb100097fba6		false	528186	1026	116	0	0	0	0	1	undefined	58e3992a5ba4cb100097f7d0
	false	undefined	0							undefined	0	58e39b3b5ba4cb100097fba7		false	528713	1027	113	0	0	0	0	1	undefined	58e3992a5ba4cb100097f7d0
	false	undefined	0							undefined	0	58e39b3b5ba4cb100097fba8		false	529225	1028	113	0	0	0	0	1	undefined	58e3992a5ba4cb100097f7d0
	false	undefined	0							undefined	0	58e39b3c5ba4cb100097fba9		false	529773	1029	115	0	0	0	0	1	undefined	58e3992a5ba4cb100097f7d0
	false	undefined	0							undefined	0	58e39b3c5ba4cb100097fbaa		false	530307	1030	116	0	0	0	0	1	undefined	58e3992a5ba4cb100097f7d0
	false	undefined	0							undefined	0	58e39b3d5ba4cb100097fbab		false	530789	1031	117	0	0	0	0	1	undefined	58e3992a5ba4cb100097f7d0
	false	undefined	0							undefined	0	58e39b3d5ba4cb100097fbac		false	531356	1032	117	0	0	0	0	1	undefined	58e3992a5ba4cb100097f7d0
	false	undefined	0							undefined	0	58e39b3e5ba4cb100097fbad		false	531903	1033	117	0	0	0	0	1	undefined	58e3992a5ba4cb100097f7d0
	false	undefined	0							undefined	0	58e39b3e5ba4cb100097fbae		false	532359	1034	114	0	0	0	0	1	undefined	58e3992a5ba4cb100097f7d0
	false	undefined	0							undefined	0	58e39b3f5ba4cb100097fbaf		false	532897	1035	116	0	0	0	0	1	undefined	58e3992a5ba4cb100097f7d0
	false	undefined	0							undefined	0	58e39b3f5ba4cb100097fbb0		false	533450	1036	115	0	0	0	0	1	undefined	58e3992a5ba4cb100097f7d0
	false	undefined	0							undefined	0	58e39b405ba4cb100097fbb1		false	533981	1037	114	0	0	0	0	1	undefined	58e3992a5ba4cb100097f7d0
	false	undefined	0							undefined	0	58e39b405ba4cb100097fbb2		false	534582	1038	117	0	0	0	0	1	undefined	58e3992a5ba4cb100097f7d0
	false	undefined	0							undefined	0	58e39b415ba4cb100097fbb3		false	535105	1039	118	0	0	0	0	1	undefined	58e3992a5ba4cb100097f7d0
	false	undefined	0							undefined	0	58e39b415ba4cb100097fbb4		false	535653	1040	117	0	0	0	0	1	undefined	58e3992a5ba4cb100097f7d0
	false	undefined	0							undefined	0	58e39b425ba4cb100097fbb5		false	536177	1041	116	0	0	0	0	1	undefined	58e3992a5ba4cb100097f7d0
	false	undefined	0							undefined	0	58e39b435ba4cb100097fbb6		false	536714	1042	117	0	0	0	0	1	undefined	58e3992a5ba4cb100097f7d0
	false	undefined	0							undefined	0	58e39b435ba4cb100097fbb7		false	537255	1043	118	0	0	0	0	1	undefined	58e3992a5ba4cb100097f7d0
	false	undefined	0							undefined	0	58e39b445ba4cb100097fbb8		false	537786	1044	117	0	0	0	0	1	undefined	58e3992a5ba4cb100097f7d0
	false	undefined	0							undefined	0	58e39b445ba4cb100097fbb9		false	538313	1045	118	0	0	0	0	1	undefined	58e3992a5ba4cb100097f7d0
	false	undefined	0							undefined	0	58e39b455ba4cb100097fbba		false	538822	1046	119	0	0	0	0	1	undefined	58e3992a5ba4cb100097f7d0
	false	undefined	0							undefined	0	58e39b455ba4cb100097fbbb		false	539401	1047	118	0	0	0	0	1	undefined	58e3992a5ba4cb100097f7d0
	false	undefined	0							undefined	0	58e39b465ba4cb100097fbbc		false	539919	1048	118	0	0	0	0	1	undefined	58e3992a5ba4cb100097f7d0
	false	undefined	0							undefined	0	58e39b465ba4cb100097fbbd		false	540458	1049	115	0	0	0	0	1	undefined	58e3992a5ba4cb100097f7d0
	false	undefined	0							undefined	0	58e39b475ba4cb100097fbbe		false	540988	1050	114	0	0	0	0	1	undefined	58e3992a5ba4cb100097f7d0
	false	undefined	0							undefined	0	58e39b475ba4cb100097fbbf		false	541489	1051	112	0	0	0	0	1	undefined	58e3992a5ba4cb100097f7d0
	false	undefined	0							undefined	0	58e39b485ba4cb100097fbc0		false	541988	1052	109	0	0	0	0	1	undefined	58e3992a5ba4cb100097f7d0
	false	undefined	0							undefined	0	58e39b485ba4cb100097fbc1		false	542588	1053	112	0	0	0	0	1	undefined	58e3992a5ba4cb100097f7d0
	false	undefined	0							undefined	0	58e39b495ba4cb100097fbc2		false	543127	1054	112	0	0	0	0	1	undefined	58e3992a5ba4cb100097f7d0
	false	undefined	0							undefined	0	58e39b495ba4cb100097fbc3		false	543607	1055	112	0	0	0	0	1	undefined	58e3992a5ba4cb100097f7d0
	false	undefined	0							undefined	0	58e39b4a5ba4cb100097fbc4		false	544218	1056	113	0	0	0	0	1	undefined	58e3992a5ba4cb100097f7d0
	false	undefined	0							undefined	0	58e39b4b5ba4cb100097fbc5		false	544820	1057	117	0	0	0	0	1	undefined	58e3992a5ba4cb100097f7d0
	false	undefined	0							undefined	0	58e39b4b5ba4cb100097fbc6		false	545338	1058	120	0	0	0	0	1	undefined	58e3992a5ba4cb100097f7d0
	false	undefined	0							undefined	0	58e39b4c5ba4cb100097fbc7		false	545864	1059	118	0	0	0	0	1	undefined	58e3992a5ba4cb100097f7d0
	false	undefined	0							undefined	0	58e39b4c5ba4cb100097fbc8		false	546407	1060	117	0	0	0	0	1	undefined	58e3992a5ba4cb100097f7d0
	false	undefined	0							undefined	0	58e39b4d5ba4cb100097fbc9		false	546941	1061	118	0	0	0	0	1	undefined	58e3992a5ba4cb100097f7d0
	false	undefined	0							undefined	0	58e39b4d5ba4cb100097fbca		false	547429	1062	117	0	0	0	0	1	undefined	58e3992a5ba4cb100097f7d0
	false	undefined	0							undefined	0	58e39b4e5ba4cb100097fbcb		false	548006	1063	117	0	0	0	0	1	undefined	58e3992a5ba4cb100097f7d0
	false	undefined	0							undefined	0	58e39b4e5ba4cb100097fbcc		false	548545	1064	121	0	0	0	0	1	undefined	58e3992a5ba4cb100097f7d0
	false	undefined	0							undefined	0	58e39b4f5ba4cb100097fbcd		false	549001	1065	122	0	0	0	0	1	undefined	58e3992a5ba4cb100097f7d0
	false	undefined	0							undefined	0	58e39b4f5ba4cb100097fbce		false	549617	1066	125	0	0	0	0	1	undefined	58e3992a5ba4cb100097f7d0
	false	undefined	0							undefined	0	58e39b505ba4cb100097fbcf		false	550160	1067	122	0	0	0	0	1	undefined	58e3992a5ba4cb100097f7d0
	false	undefined	0							undefined	0	58e39b515ba4cb100097fbd0		false	550645	1068	115	0	0	0	0	1	undefined	58e3992a5ba4cb100097f7d0
	false	undefined	0							undefined	0	58e39b515ba4cb100097fbd1		false	551216	1069	114	0	0	0	0	1	undefined	58e3992a5ba4cb100097f7d0
	false	undefined	0							undefined	0	58e39b525ba4cb100097fbd2		false	551732	1070	119	0	0	0	0	1	undefined	58e3992a5ba4cb100097f7d0
	false	undefined	0							undefined	0	58e39b525ba4cb100097fbd3		false	552272	1071	123	0	0	0	0	1	undefined	58e3992a5ba4cb100097f7d0
	false	undefined	0							undefined	0	58e39b535ba4cb100097fbd4		false	552818	1072	121	0	0	0	0	1	undefined	58e3992a5ba4cb100097f7d0
	false	undefined	0							undefined	0	58e39b535ba4cb100097fbd5		false	553417	1073	121	0	0	0	0	1	undefined	58e3992a5ba4cb100097f7d0
	false	undefined	0							undefined	0	58e39b545ba4cb100097fbd6		false	553960	1074	118	0	0	0	0	1	undefined	58e3992a5ba4cb100097f7d0
	false	undefined	0							undefined	0	58e39b545ba4cb100097fbd7		false	554405	1075	114	0	0	0	0	1	undefined	58e3992a5ba4cb100097f7d0
	false	undefined	0							undefined	0	58e39b555ba4cb100097fbd8		false	554958	1076	113	0	0	0	0	1	undefined	58e3992a5ba4cb100097f7d0
	false	undefined	0							undefined	0	58e39b555ba4cb100097fbd9		false	555484	1077	115	0	0	0	0	1	undefined	58e3992a5ba4cb100097f7d0
	false	undefined	0							undefined	0	58e39b565ba4cb100097fbda		false	556020	1078	115	0	0	0	0	1	undefined	58e3992a5ba4cb100097f7d0
	false	undefined	0							undefined	0	58e39b565ba4cb100097fbdb		false	556566	1079	114	0	0	0	0	1	undefined	58e3992a5ba4cb100097f7d0
	false	undefined	0							undefined	0	58e39b575ba4cb100097fbdc		false	557015	1080	113	0	0	0	0	1	undefined	58e3992a5ba4cb100097f7d0
	false	undefined	0							undefined	0	58e39b575ba4cb100097fbdd		false	557556	1081	117	0	0	0	0	1	undefined	58e3992a5ba4cb100097f7d0
	false	undefined	0							undefined	0	58e39b585ba4cb100097fbde		false	558040	1082	116	0	0	0	0	1	undefined	58e3992a5ba4cb100097f7d0
	false	undefined	0							undefined	0	58e39b585ba4cb100097fbdf		false	558615	1083	115	0	0	0	0	1	undefined	58e3992a5ba4cb100097f7d0
	false	undefined	0							undefined	0	58e39b595ba4cb100097fbe0		false	559081	1084	114	0	0	0	0	1	undefined	58e3992a5ba4cb100097f7d0
	false	undefined	0							undefined	0	58e39b5a5ba4cb100097fbe1		false	559705	1085	116	0	0	0	0	1	undefined	58e3992a5ba4cb100097f7d0
	false	undefined	0							undefined	0	58e39b5a5ba4cb100097fbe2		false	560232	1086	116	0	0	0	0	1	undefined	58e3992a5ba4cb100097f7d0
	false	undefined	0							undefined	0	58e39b5b5ba4cb100097fbe3		false	560772	1087	112	0	0	0	0	1	undefined	58e3992a5ba4cb100097f7d0
	false	undefined	0							undefined	0	58e39b5b5ba4cb100097fbe4		false	561306	1088	109	0	0	0	0	1	undefined	58e3992a5ba4cb100097f7d0
	false	undefined	0							undefined	0	58e39b5c5ba4cb100097fbe5		false	561825	1089	109	0	0	0	0	1	undefined	58e3992a5ba4cb100097f7d0
	false	undefined	0							undefined	0	58e39b5c5ba4cb100097fbe6		false	562326	1090	109	0	0	0	0	1	undefined	58e3992a5ba4cb100097f7d0
	false	undefined	0							undefined	0	58e39b5d5ba4cb100097fbe7		false	562896	1091	107	0	0	0	0	1	undefined	58e3992a5ba4cb100097f7d0
	false	undefined	0							undefined	0	58e39b5d5ba4cb100097fbe8		false	563383	1092	110	0	0	0	0	1	undefined	58e3992a5ba4cb100097f7d0
	false	undefined	0							undefined	0	58e39b5e5ba4cb100097fbe9		false	563980	1093	111	0	0	0	0	1	undefined	58e3992a5ba4cb100097f7d0
	false	undefined	0							undefined	0	58e39b5e5ba4cb100097fbea		false	564581	1094	113	0	0	0	0	1	undefined	58e3992a5ba4cb100097f7d0
	false	undefined	0							undefined	0	58e39b5f5ba4cb100097fbeb		false	565120	1095	113	0	0	0	0	1	undefined	58e3992a5ba4cb100097f7d0
	false	undefined	0							undefined	0	58e39b605ba4cb100097fbec		false	565642	1096	112	0	0	0	0	1	undefined	58e3992a5ba4cb100097f7d0
	false	undefined	0							undefined	0	58e39b605ba4cb100097fbed		false	566139	1097	115	0	0	0	0	1	undefined	58e3992a5ba4cb100097f7d0
	false	undefined	0							undefined	0	58e39b615ba4cb100097fbee		false	566707	1098	114	0	0	0	0	1	undefined	58e3992a5ba4cb100097f7d0
	false	undefined	0							undefined	0	58e39b615ba4cb100097fbef		false	567159	1099	114	0	0	0	0	1	undefined	58e3992a5ba4cb100097f7d0
	false	undefined	0							undefined	0	58e39b625ba4cb100097fbf0		false	567800	1100	114	0	0	0	0	1	undefined	58e3992a5ba4cb100097f7d0
	false	undefined	0							undefined	0	58e39b625ba4cb100097fbf1		false	568392	1101	113	0	0	0	0	1	undefined	58e3992a5ba4cb100097f7d0
	false	undefined	0							undefined	0	58e39b635ba4cb100097fbf2		false	568924	1102	112	0	0	0	0	1	undefined	58e3992a5ba4cb100097f7d0
	false	undefined	0							undefined	0	58e39b635ba4cb100097fbf3		false	569456	1103	110	0	0	0	0	1	undefined	58e3992a5ba4cb100097f7d0
	false	undefined	0							undefined	0	58e39b645ba4cb100097fbf4		false	569988	1104	110	0	0	0	0	1	undefined	58e3992a5ba4cb100097f7d0
	false	undefined	0							undefined	0	58e39b645ba4cb100097fbf5		false	570529	1105	109	0	0	0	0	1	undefined	58e3992a5ba4cb100097f7d0
	false	undefined	0							undefined	0	58e39b655ba4cb100097fbf6		false	571001	1106	-1	0	0	0	0	1	undefined	58e3992a5ba4cb100097f7d0
	false	undefined	0							undefined	0	58e39b655ba4cb100097fbf7		false	571587	1107	-1	0	0	0	0	1	undefined	58e3992a5ba4cb100097f7d0
	false	undefined	0							undefined	0	58e39b665ba4cb100097fbf8		true	572130	1108	-1	0	0	0	0	1	undefined	58e3992a5ba4cb100097f7d0
	false	undefined	0							undefined	0	58e39b675ba4cb100097fbf9		true	572709	1112	68	0	0	0	0	1	undefined	58e3992a5ba4cb100097f7d0
	false	undefined	0							undefined	0	58e39b675ba4cb100097fbfa		true	573199	1113	80	0	0	0	0	1	undefined	58e3992a5ba4cb100097f7d0
	false	undefined	0							undefined	0	58e39b685ba4cb100097fbfb		true	573801	1114	94	0	0	0	0	1	undefined	58e3992a5ba4cb100097f7d0
	false	undefined	0							undefined	0	58e39b685ba4cb100097fbfc		true	574331	1115	-1	0	0	0	0	1	undefined	58e3992a5ba4cb100097f7d0
	false	undefined	0							undefined	0	58e39b695ba4cb100097fbfd		true	574813	1116	-1	0	0	0	0	1	undefined	58e3992a5ba4cb100097f7d0
	false	undefined	0							undefined	0	58e39b695ba4cb100097fbfe		true	575313	1117	-1	0	0	0	0	1	undefined	58e3992a5ba4cb100097f7d0
	false	undefined	0							undefined	0	58e39b6a5ba4cb100097fbff		true	575936	1118	75	0	0	0	0	1	undefined	58e3992a5ba4cb100097f7d0
	false	undefined	0							undefined	0	58e39b6a5ba4cb100097fc00		true	576539	1119	79	0	0	0	0	1	undefined	58e3992a5ba4cb100097f7d0
	false	undefined	0							undefined	0	58e39b6b5ba4cb100097fc01		true	577085	1120	-1	0	0	0	0	1	undefined	58e3992a5ba4cb100097f7d0
	false	undefined	0							undefined	0	58e39b6b5ba4cb100097fc02		true	577593	1121	-1	0	0	0	0	1	undefined	58e3992a5ba4cb100097f7d0
	false	undefined	0							undefined	0	58e39b6c5ba4cb100097fc03		true	578141	1122	-1	0	0	0	0	1	undefined	58e3992a5ba4cb100097f7d0
	false	undefined	0							undefined	0	58e39b6d5ba4cb100097fc04		true	578681	1123	-1	0	0	0	0	1	undefined	58e3992a5ba4cb100097f7d0
	false	undefined	0							undefined	0	58e39b6d5ba4cb100097fc05		true	579272	1124	-1	0	0	0	0	1	undefined	58e3992a5ba4cb100097f7d0
	false	undefined	0							undefined	0	58e39b6e5ba4cb100097fc06		true	579781	1125	-1	0	0	0	0	1	undefined	58e3992a5ba4cb100097f7d0
	false	undefined	0							undefined	0	58e39b6e5ba4cb100097fc07		false	580338	1126	-1	0	0	0	0	1	undefined	58e3992a5ba4cb100097f7d0
	false	undefined	0							undefined	0	58e39b6f5ba4cb100097fc08		false	580866	1127	-1	0	0	0	0	1	undefined	58e3992a5ba4cb100097f7d0
	false	undefined	0							undefined	0	58e39b6f5ba4cb100097fc09		false	581385	1128	-1	0	0	0	0	1	undefined	58e3992a5ba4cb100097f7d0
	false	undefined	0							undefined	0	58e39b705ba4cb100097fc0a		false	581940	1132	-1	0	0	0	0	1	undefined	58e3992a5ba4cb100097f7d0
	false	undefined	0							undefined	0	58e39b705ba4cb100097fc0b		true	582480	1133	-1	0	0	0	0	1	undefined	58e3992a5ba4cb100097f7d0
	false	undefined	0							undefined	0	58e39b715ba4cb100097fc0c		true	583101	1134	-1	0	0	0	0	1	undefined	58e3992a5ba4cb100097f7d0
	false	undefined	0							undefined	0	58e39b715ba4cb100097fc0d		true	583614	1135	-1	0	0	0	0	1	undefined	58e3992a5ba4cb100097f7d0
	false	undefined	0							undefined	0	58e39b725ba4cb100097fc0e		true	584153	1136	-1	0	0	0	0	1	undefined	58e3992a5ba4cb100097f7d0
	false	undefined	0							undefined	0	58e39b735ba4cb100097fc0f		true	584669	1137	-1	0	0	0	0	1	undefined	58e3992a5ba4cb100097f7d0
	false	undefined	0							undefined	0	58e39b735ba4cb100097fc10		true	585217	1138	-1	0	0	0	0	1	undefined	58e3992a5ba4cb100097f7d0
	false	undefined	0							undefined	0	58e39b745ba4cb100097fc11		true	585727	1139	-1	0	0	0	0	1	undefined	58e3992a5ba4cb100097f7d0
	false	undefined	0							undefined	0	58e39b745ba4cb100097fc12		true	586266	1140	73	0	0	0	0	1	undefined	58e3992a5ba4cb100097f7d0
	false	undefined	0							undefined	0	58e39b755ba4cb100097fc13		true	586811	1141	-1	0	0	0	0	1	undefined	58e3992a5ba4cb100097f7d0
	false	undefined	0							undefined	0	58e39b755ba4cb100097fc14		true	587270	1142	-1	0	0	0	0	1	undefined	58e3992a5ba4cb100097f7d0
	false	undefined	0							undefined	0	58e39b765ba4cb100097fc15		true	587824	1143	-1	0	0	0	0	1	undefined	58e3992a5ba4cb100097f7d0
[truncated: 34 more columns]
