# Supplementary material for: Real-Time Chest Compression Quality Measurements by Smartphone Camera
Source: J Healthc Eng. 2018 Oct 28;2018:6241856. doi: 10.1155/2018/6241856 (PMC6277120; doi:10.1155/2018/6241856)
Supplement: Supplementary Materials — The supplementary material consists data files for each of the five presented experiments. For the first four experiments, the data are presented for each test person as Matlab mat-files containing both the compared reference data and the detection data. For the fifth test, CPR summary report test, the data is presented as ssx-files (reference data) and xls-files (detection data). A readme-file explaining the preprocessing performed prior to the comparison between reference data and detection data is here also included. [file 6241856.f1.zip › 6241856.f1/Data files/Test 5. CPR summary report/TestData/TP5/TP5.xls]

## Sheet: Anne.csv
$__	isNew	errors	_maxListeners	_doc	_pres	_posts	save	db	collection	discriminators	__v	id	_id	scepticalToFrequency	mse	sequence	rate	pp2pt	p2et	s2pt	rd	pd	edt	sid	schema	$__delta	$__version	increment	$__where	remove	model	$__buildDoc	init	$__storeShard	hook	pre	post	removePre	_lazySetupHooks	update	set	$__shouldModify	$__set	getValue	setValue	get	$__path	markModified	$__try
	false	undefined	0							undefined	0	58e7a43867f4f81000b4d22f		true	595	0	0	0	0	0	0	1	undefined	58e7a43767f4f81000b4d22e
	false	undefined	0							undefined	0	58e7a43867f4f81000b4d230		true	1522	1	0	0	0	0	0	1	undefined	58e7a43767f4f81000b4d22e
	false	undefined	0							undefined	0	58e7a43967f4f81000b4d231		true	1845	2	0	0	0	0	0	1	undefined	58e7a43767f4f81000b4d22e
	false	undefined	0							undefined	0	58e7a43967f4f81000b4d232		true	2360	3	0	0	0	0	0	1	undefined	58e7a43767f4f81000b4d22e
	false	undefined	0							undefined	0	58e7a43a67f4f81000b4d233		true	2858	4	0	0	0	0	0	1	undefined	58e7a43767f4f81000b4d22e
	false	undefined	0							undefined	0	58e7a43a67f4f81000b4d234		false	3448	5	-1	0	0	0	0	1	undefined	58e7a43767f4f81000b4d22e
	false	undefined	0							undefined	0	58e7a43b67f4f81000b4d235		true	3984	6	65	0	0	0	0	1	undefined	58e7a43767f4f81000b4d22e
	false	undefined	0							undefined	0	58e7a43b67f4f81000b4d236		true	4455	7	60	0	0	0	0	1	undefined	58e7a43767f4f81000b4d22e
	false	undefined	0							undefined	0	58e7a43c67f4f81000b4d237		true	4951	11	60	0	0	0	0	1	undefined	58e7a43767f4f81000b4d22e
	false	undefined	0							undefined	0	58e7a43c67f4f81000b4d238		true	5496	12	74	0	0	0	0	1	undefined	58e7a43767f4f81000b4d22e
	false	undefined	0							undefined	0	58e7a43d67f4f81000b4d239		true	6037	13	-1	0	0	0	0	1	undefined	58e7a43767f4f81000b4d22e
	false	undefined	0							undefined	0	58e7a43e67f4f81000b4d23a		true	6586	14	-1	0	0	0	0	1	undefined	58e7a43767f4f81000b4d22e
	false	undefined	0							undefined	0	58e7a43e67f4f81000b4d23b		true	7116	15	154	0	0	0	0	1	undefined	58e7a43767f4f81000b4d22e
	false	undefined	0							undefined	0	58e7a43f67f4f81000b4d23c		true	7635	16	-1	0	0	0	0	1	undefined	58e7a43767f4f81000b4d22e
	false	undefined	0							undefined	0	58e7a43f67f4f81000b4d23d		true	8181	17	-1	0	0	0	0	1	undefined	58e7a43767f4f81000b4d22e
	false	undefined	0							undefined	0	58e7a44067f4f81000b4d23e		false	8727	18	-1	0	0	0	0	1	undefined	58e7a43767f4f81000b4d22e
	false	undefined	0							undefined	0	58e7a44067f4f81000b4d23f		true	9250	19	-1	0	0	0	0	1	undefined	58e7a43767f4f81000b4d22e
	false	undefined	0							undefined	0	58e7a44167f4f81000b4d240		true	9769	20	-1	0	0	0	0	1	undefined	58e7a43767f4f81000b4d22e
	false	undefined	0							undefined	0	58e7a44167f4f81000b4d241		true	10311	21	-1	0	0	0	0	1	undefined	58e7a43767f4f81000b4d22e
	false	undefined	0							undefined	0	58e7a44267f4f81000b4d242		true	10864	22	-1	0	0	0	0	1	undefined	58e7a43767f4f81000b4d22e
	false	undefined	0							undefined	0	58e7a44267f4f81000b4d243		true	11393	26	97	0	0	0	0	1	undefined	58e7a43767f4f81000b4d22e
	false	undefined	0							undefined	0	58e7a44367f4f81000b4d244		true	11927	27	-1	0	0	0	0	1	undefined	58e7a43767f4f81000b4d22e
	false	undefined	0							undefined	0	58e7a44467f4f81000b4d245		true	12477	28	-1	0	0	0	0	1	undefined	58e7a43767f4f81000b4d22e
	false	undefined	0							undefined	0	58e7a44467f4f81000b4d246		false	13068	29	82	0	0	0	0	1	undefined	58e7a43767f4f81000b4d22e
	false	undefined	0							undefined	0	58e7a44567f4f81000b4d247		true	13588	30	75	0	0	0	0	1	undefined	58e7a43767f4f81000b4d22e
	false	undefined	0							undefined	0	58e7a44567f4f81000b4d248		true	14062	31	-1	0	0	0	0	1	undefined	58e7a43767f4f81000b4d22e
	false	undefined	0							undefined	0	58e7a44667f4f81000b4d249		true	14595	32	-1	0	0	0	0	1	undefined	58e7a43767f4f81000b4d22e
	false	undefined	0							undefined	0	58e7a44667f4f81000b4d24a		true	15050	33	-1	0	0	0	0	1	undefined	58e7a43767f4f81000b4d22e
	false	undefined	0							undefined	0	58e7a44767f4f81000b4d24b		true	15605	34	-1	0	0	0	0	1	undefined	58e7a43767f4f81000b4d22e
	false	undefined	0							undefined	0	58e7a44767f4f81000b4d24c		true	16136	35	-1	0	0	0	0	1	undefined	58e7a43767f4f81000b4d22e
	false	undefined	0							undefined	0	58e7a44867f4f81000b4d24d		true	16657	36	-1	0	0	0	0	1	undefined	58e7a43767f4f81000b4d22e
	false	undefined	0							undefined	0	58e7a44867f4f81000b4d24e		true	17194	37	70	0	0	0	0	1	undefined	58e7a43767f4f81000b4d22e
	false	undefined	0							undefined	0	58e7a44967f4f81000b4d24f		true	17707	38	70	0	0	0	0	1	undefined	58e7a43767f4f81000b4d22e
	false	undefined	0							undefined	0	58e7a44967f4f81000b4d250		true	18209	39	72	0	0	0	0	1	undefined	58e7a43767f4f81000b4d22e
	false	undefined	0							undefined	0	58e7a44a67f4f81000b4d251		true	18740	40	-1	0	0	0	0	1	undefined	58e7a43767f4f81000b4d22e
	false	undefined	0							undefined	0	58e7a44a67f4f81000b4d252		true	19346	41	-1	0	0	0	0	1	undefined	58e7a43767f4f81000b4d22e
	false	undefined	0							undefined	0	58e7a44b67f4f81000b4d253		true	19793	42	-1	0	0	0	0	1	undefined	58e7a43767f4f81000b4d22e
	false	undefined	0							undefined	0	58e7a44b67f4f81000b4d254		true	20351	43	-1	0	0	0	0	1	undefined	58e7a43767f4f81000b4d22e
	false	undefined	0							undefined	0	58e7a44c67f4f81000b4d255		true	20883	47	-1	0	0	0	0	1	undefined	58e7a43767f4f81000b4d22e
	false	undefined	0							undefined	0	58e7a44c67f4f81000b4d256		true	21410	48	-1	0	0	0	0	1	undefined	58e7a43767f4f81000b4d22e
	false	undefined	0							undefined	0	58e7a44d67f4f81000b4d257		false	21927	49	-1	0	0	0	0	1	undefined	58e7a43767f4f81000b4d22e
	false	undefined	0							undefined	0	58e7a44d67f4f81000b4d258		false	22466	50	-1	0	0	0	0	1	undefined	58e7a43767f4f81000b4d22e
	false	undefined	0							undefined	0	58e7a44e67f4f81000b4d259		false	23017	51	-1	0	0	0	0	1	undefined	58e7a43767f4f81000b4d22e
	false	undefined	0							undefined	0	58e7a44f67f4f81000b4d25a		false	23542	52	-1	0	0	0	0	1	undefined	58e7a43767f4f81000b4d22e
	false	undefined	0							undefined	0	58e7a44f67f4f81000b4d25b		false	24085	53	-1	0	0	0	0	1	undefined	58e7a43767f4f81000b4d22e
	false	undefined	0							undefined	0	58e7a45067f4f81000b4d25c		false	24684	54	-1	0	0	0	0	1	undefined	58e7a43767f4f81000b4d22e
	false	undefined	0							undefined	0	58e7a45067f4f81000b4d25d		false	25201	55	-1	0	0	0	0	1	undefined	58e7a43767f4f81000b4d22e
	false	undefined	0							undefined	0	58e7a45167f4f81000b4d25e		true	25689	56	71	0	0	0	0	1	undefined	58e7a43767f4f81000b4d22e
	false	undefined	0							undefined	0	58e7a45167f4f81000b4d25f		false	26212	57	72	0	0	0	0	1	undefined	58e7a43767f4f81000b4d22e
	false	undefined	0							undefined	0	58e7a45267f4f81000b4d260		true	26751	58	66	0	0	0	0	1	undefined	58e7a43767f4f81000b4d22e
	false	undefined	0							undefined	0	58e7a45267f4f81000b4d261		true	27268	62	103	0	0	0	0	1	undefined	58e7a43767f4f81000b4d22e
	false	undefined	0							undefined	0	58e7a45367f4f81000b4d262		false	27782	63	111	0	0	0	0	1	undefined	58e7a43767f4f81000b4d22e
	false	undefined	0							undefined	0	58e7a45367f4f81000b4d263		false	28345	64	111	0	0	0	0	1	undefined	58e7a43767f4f81000b4d22e
	false	undefined	0							undefined	0	58e7a45467f4f81000b4d264		false	28884	65	109	0	0	0	0	1	undefined	58e7a43767f4f81000b4d22e
	false	undefined	0							undefined	0	58e7a45467f4f81000b4d265		false	29426	66	107	0	0	0	0	1	undefined	58e7a43767f4f81000b4d22e
	false	undefined	0							undefined	0	58e7a45567f4f81000b4d266		false	29973	67	103	0	0	0	0	1	undefined	58e7a43767f4f81000b4d22e
	false	undefined	0							undefined	0	58e7a45567f4f81000b4d267		false	30503	68	103	0	0	0	0	1	undefined	58e7a43767f4f81000b4d22e
	false	undefined	0							undefined	0	58e7a45667f4f81000b4d268		false	31091	69	106	0	0	0	0	1	undefined	58e7a43767f4f81000b4d22e
	false	undefined	0							undefined	0	58e7a45767f4f81000b4d269		false	31565	70	107	0	0	0	0	1	undefined	58e7a43767f4f81000b4d22e
	false	undefined	0							undefined	0	58e7a45767f4f81000b4d26a		false	32094	71	107	0	0	0	0	1	undefined	58e7a43767f4f81000b4d22e
	false	undefined	0							undefined	0	58e7a45867f4f81000b4d26b		false	32633	72	106	0	0	0	0	1	undefined	58e7a43767f4f81000b4d22e
	false	undefined	0							undefined	0	58e7a45867f4f81000b4d26c		false	33176	73	107	0	0	0	0	1	undefined	58e7a43767f4f81000b4d22e
	false	undefined	0							undefined	0	58e7a45967f4f81000b4d26d		false	33695	74	106	0	0	0	0	1	undefined	58e7a43767f4f81000b4d22e
	false	undefined	0							undefined	0	58e7a45967f4f81000b4d26e		false	34152	75	102	0	0	0	0	1	undefined	58e7a43767f4f81000b4d22e
	false	undefined	0							undefined	0	58e7a45a67f4f81000b4d26f		false	34690	76	103	0	0	0	0	1	undefined	58e7a43767f4f81000b4d22e
	false	undefined	0							undefined	0	58e7a45a67f4f81000b4d270		false	35243	77	102	0	0	0	0	1	undefined	58e7a43767f4f81000b4d22e
	false	undefined	0							undefined	0	58e7a45b67f4f81000b4d271		false	35845	78	106	0	0	0	0	1	undefined	58e7a43767f4f81000b4d22e
	false	undefined	0							undefined	0	58e7a45b67f4f81000b4d272		false	36360	79	111	0	0	0	0	1	undefined	58e7a43767f4f81000b4d22e
	false	undefined	0							undefined	0	58e7a45c67f4f81000b4d273		false	36916	80	112	0	0	0	0	1	undefined	58e7a43767f4f81000b4d22e
	false	undefined	0							undefined	0	58e7a45c67f4f81000b4d274		false	37444	81	114	0	0	0	0	1	undefined	58e7a43767f4f81000b4d22e
	false	undefined	0							undefined	0	58e7a45d67f4f81000b4d275		false	37987	82	111	0	0	0	0	1	undefined	58e7a43767f4f81000b4d22e
	false	undefined	0							undefined	0	58e7a45d67f4f81000b4d276		false	38532	83	108	0	0	0	0	1	undefined	58e7a43767f4f81000b4d22e
	false	undefined	0							undefined	0	58e7a45e67f4f81000b4d277		false	39109	84	99	0	0	0	0	1	undefined	58e7a43767f4f81000b4d22e
	false	undefined	0							undefined	0	58e7a45f67f4f81000b4d278		false	39645	85	99	0	0	0	0	1	undefined	58e7a43767f4f81000b4d22e
	false	undefined	0							undefined	0	58e7a45f67f4f81000b4d279		false	40189	86	103	0	0	0	0	1	undefined	58e7a43767f4f81000b4d22e
	false	undefined	0							undefined	0	58e7a46067f4f81000b4d27a		false	40717	87	105	0	0	0	0	1	undefined	58e7a43767f4f81000b4d22e
	false	undefined	0							undefined	0	58e7a46067f4f81000b4d27b		false	41256	88	106	0	0	0	0	1	undefined	58e7a43767f4f81000b4d22e
	false	undefined	0							undefined	0	58e7a46167f4f81000b4d27c		false	41783	89	105	0	0	0	0	1	undefined	58e7a43767f4f81000b4d22e
	false	undefined	0							undefined	0	58e7a46167f4f81000b4d27d		false	42315	90	104	0	0	0	0	1	undefined	58e7a43767f4f81000b4d22e
	false	undefined	0							undefined	0	58e7a46267f4f81000b4d27e		false	42858	91	102	0	0	0	0	1	undefined	58e7a43767f4f81000b4d22e
	false	undefined	0							undefined	0	58e7a46267f4f81000b4d27f		false	43394	92	104	0	0	0	0	1	undefined	58e7a43767f4f81000b4d22e
	false	undefined	0							undefined	0	58e7a46367f4f81000b4d280		false	43919	93	101	0	0	0	0	1	undefined	58e7a43767f4f81000b4d22e
	false	undefined	0							undefined	0	58e7a46367f4f81000b4d281		false	44456	94	101	0	0	0	0	1	undefined	58e7a43767f4f81000b4d22e
	false	undefined	0							undefined	0	58e7a46467f4f81000b4d282		false	44990	95	98	0	0	0	0	1	undefined	58e7a43767f4f81000b4d22e
	false	undefined	0							undefined	0	58e7a46567f4f81000b4d283		false	45546	96	97	0	0	0	0	1	undefined	58e7a43767f4f81000b4d22e
	false	undefined	0							undefined	0	58e7a46567f4f81000b4d284		false	46129	97	102	0	0	0	0	1	undefined	58e7a43767f4f81000b4d22e
	false	undefined	0							undefined	0	58e7a46667f4f81000b4d285		false	46665	98	104	0	0	0	0	1	undefined	58e7a43767f4f81000b4d22e
	false	undefined	0							undefined	0	58e7a46667f4f81000b4d286		false	47195	99	109	0	0	0	0	1	undefined	58e7a43767f4f81000b4d22e
	false	undefined	0							undefined	0	58e7a46767f4f81000b4d287		false	47730	100	110	0	0	0	0	1	undefined	58e7a43767f4f81000b4d22e
	false	undefined	0							undefined	0	58e7a46767f4f81000b4d288		false	48271	101	113	0	0	0	0	1	undefined	58e7a43767f4f81000b4d22e
	false	undefined	0							undefined	0	58e7a46867f4f81000b4d289		false	48799	102	112	0	0	0	0	1	undefined	58e7a43767f4f81000b4d22e
	false	undefined	0							undefined	0	58e7a46867f4f81000b4d28a		false	49331	103	108	0	0	0	0	1	undefined	58e7a43767f4f81000b4d22e
	false	undefined	0							undefined	0	58e7a46967f4f81000b4d28b		false	49866	104	109	0	0	0	0	1	undefined	58e7a43767f4f81000b4d22e
	false	undefined	0							undefined	0	58e7a46967f4f81000b4d28c		false	50408	105	113	0	0	0	0	1	undefined	58e7a43767f4f81000b4d22e
	false	undefined	0							undefined	0	58e7a46a67f4f81000b4d28d		false	50938	106	114	0	0	0	0	1	undefined	58e7a43767f4f81000b4d22e
	false	undefined	0							undefined	0	58e7a46a67f4f81000b4d28e		false	51476	107	114	0	0	0	0	1	undefined	58e7a43767f4f81000b4d22e
	false	undefined	0							undefined	0	58e7a46b67f4f81000b4d28f		false	51989	108	118	0	0	0	0	1	undefined	58e7a43767f4f81000b4d22e
	false	undefined	0							undefined	0	58e7a46b67f4f81000b4d290		false	52470	109	117	0	0	0	0	1	undefined	58e7a43767f4f81000b4d22e
	false	undefined	0							undefined	0	58e7a46c67f4f81000b4d291		false	53085	110	114	0	0	0	0	1	undefined	58e7a43767f4f81000b4d22e
	false	undefined	0							undefined	0	58e7a46d67f4f81000b4d292		false	53534	111	112	0	0	0	0	1	undefined	58e7a43767f4f81000b4d22e
	false	undefined	0							undefined	0	58e7a46d67f4f81000b4d293		false	54146	112	117	0	0	0	0	1	undefined	58e7a43767f4f81000b4d22e
	false	undefined	0							undefined	0	58e7a46e67f4f81000b4d294		false	54672	113	120	0	0	0	0	1	undefined	58e7a43767f4f81000b4d22e
	false	undefined	0							undefined	0	58e7a46e67f4f81000b4d295		false	55221	114	115	0	0	0	0	1	undefined	58e7a43767f4f81000b4d22e
	false	undefined	0							undefined	0	58e7a46f67f4f81000b4d296		false	55753	115	113	0	0	0	0	1	undefined	58e7a43767f4f81000b4d22e
	false	undefined	0							undefined	0	58e7a46f67f4f81000b4d297		false	56354	116	106	0	0	0	0	1	undefined	58e7a43767f4f81000b4d22e
	false	undefined	0							undefined	0	58e7a47067f4f81000b4d298		false	56884	117	105	0	0	0	0	1	undefined	58e7a43767f4f81000b4d22e
	false	undefined	0							undefined	0	58e7a47067f4f81000b4d299		false	57414	118	101	0	0	0	0	1	undefined	58e7a43767f4f81000b4d22e
	false	undefined	0							undefined	0	58e7a47167f4f81000b4d29a		false	58031	119	104	0	0	0	0	1	undefined	58e7a43767f4f81000b4d22e
	false	undefined	0							undefined	0	58e7a47267f4f81000b4d29b		false	58561	120	108	0	0	0	0	1	undefined	58e7a43767f4f81000b4d22e
	false	undefined	0							undefined	0	58e7a47267f4f81000b4d29c		false	59089	121	110	0	0	0	0	1	undefined	58e7a43767f4f81000b4d22e
	false	undefined	0							undefined	0	58e7a47367f4f81000b4d29d		false	59691	122	110	0	0	0	0	1	undefined	58e7a43767f4f81000b4d22e
	false	undefined	0							undefined	0	58e7a47367f4f81000b4d29e		false	60215	123	105	0	0	0	0	1	undefined	58e7a43767f4f81000b4d22e
	false	undefined	0							undefined	0	58e7a47467f4f81000b4d29f		false	60769	124	101	0	0	0	0	1	undefined	58e7a43767f4f81000b4d22e
	false	undefined	0							undefined	0	58e7a47467f4f81000b4d2a0		false	61372	125	102	0	0	0	0	1	undefined	58e7a43767f4f81000b4d22e
	false	undefined	0							undefined	0	58e7a47567f4f81000b4d2a1		false	61888	126	103	0	0	0	0	1	undefined	58e7a43767f4f81000b4d22e
	false	undefined	0							undefined	0	58e7a47567f4f81000b4d2a2		false	62497	127	104	0	0	0	0	1	undefined	58e7a43767f4f81000b4d22e
	false	undefined	0							undefined	0	58e7a47667f4f81000b4d2a3		false	63019	128	105	0	0	0	0	1	undefined	58e7a43767f4f81000b4d22e
	false	undefined	0							undefined	0	58e7a47767f4f81000b4d2a4		false	63573	129	106	0	0	0	0	1	undefined	58e7a43767f4f81000b4d22e
	false	undefined	0							undefined	0	58e7a47767f4f81000b4d2a5		false	64099	130	108	0	0	0	0	1	undefined	58e7a43767f4f81000b4d22e
	false	undefined	0							undefined	0	58e7a47867f4f81000b4d2a6		false	64637	131	108	0	0	0	0	1	undefined	58e7a43767f4f81000b4d22e
	false	undefined	0							undefined	0	58e7a47867f4f81000b4d2a7		false	65161	132	113	0	0	0	0	1	undefined	58e7a43767f4f81000b4d22e
	false	undefined	0							undefined	0	58e7a47967f4f81000b4d2a8		false	65705	133	117	0	0	0	0	1	undefined	58e7a43767f4f81000b4d22e
	false	undefined	0							undefined	0	58e7a47967f4f81000b4d2a9		false	66145	134	114	0	0	0	0	1	undefined	58e7a43767f4f81000b4d22e
	false	undefined	0							undefined	0	58e7a47a67f4f81000b4d2aa		false	66705	135	113	0	0	0	0	1	undefined	58e7a43767f4f81000b4d22e
	false	undefined	0							undefined	0	58e7a47a67f4f81000b4d2ab		false	67222	136	112	0	0	0	0	1	undefined	58e7a43767f4f81000b4d22e
	false	undefined	0							undefined	0	58e7a47b67f4f81000b4d2ac		false	67766	137	113	0	0	0	0	1	undefined	58e7a43767f4f81000b4d22e
	false	undefined	0							undefined	0	58e7a47b67f4f81000b4d2ad		false	68228	138	109	0	0	0	0	1	undefined	58e7a43767f4f81000b4d22e
	false	undefined	0							undefined	0	58e7a47c67f4f81000b4d2ae		false	68791	139	109	0	0	0	0	1	undefined	58e7a43767f4f81000b4d22e
	false	undefined	0							undefined	0	58e7a47c67f4f81000b4d2af		false	69309	140	116	0	0	0	0	1	undefined	58e7a43767f4f81000b4d22e
	false	undefined	0							undefined	0	58e7a47d67f4f81000b4d2b0		false	69839	141	118	0	0	0	0	1	undefined	58e7a43767f4f81000b4d22e
	false	undefined	0							undefined	0	58e7a47d67f4f81000b4d2b1		false	70365	142	117	0	0	0	0	1	undefined	58e7a43767f4f81000b4d22e
	false	undefined	0							undefined	0	58e7a47e67f4f81000b4d2b2		false	70908	143	115	0	0	0	0	1	undefined	58e7a43767f4f81000b4d22e
	false	undefined	0							undefined	0	58e7a47e67f4f81000b4d2b3		false	71455	144	116	0	0	0	0	1	undefined	58e7a43767f4f81000b4d22e
	false	undefined	0							undefined	0	58e7a47f67f4f81000b4d2b4		false	71924	145	115	0	0	0	0	1	undefined	58e7a43767f4f81000b4d22e
	false	undefined	0							undefined	0	58e7a47f67f4f81000b4d2b5		false	72510	146	114	0	0	0	0	1	undefined	58e7a43767f4f81000b4d22e
	false	undefined	0							undefined	0	58e7a48067f4f81000b4d2b6		false	72973	147	112	0	0	0	0	1	undefined	58e7a43767f4f81000b4d22e
	false	undefined	0							undefined	0	58e7a48067f4f81000b4d2b7		false	73515	148	114	0	0	0	0	1	undefined	58e7a43767f4f81000b4d22e
	false	undefined	0							undefined	0	58e7a48167f4f81000b4d2b8		false	74063	149	114	0	0	0	0	1	undefined	58e7a43767f4f81000b4d22e
	false	undefined	0							undefined	0	58e7a48267f4f81000b4d2b9		false	74567	150	113	0	0	0	0	1	undefined	58e7a43767f4f81000b4d22e
	false	undefined	0							undefined	0	58e7a48267f4f81000b4d2ba		false	75116	151	115	0	0	0	0	1	undefined	58e7a43767f4f81000b4d22e
	false	undefined	0							undefined	0	58e7a48367f4f81000b4d2bb		false	75574	152	112	0	0	0	0	1	undefined	58e7a43767f4f81000b4d22e
	false	undefined	0							undefined	0	58e7a48367f4f81000b4d2bc		false	76197	153	118	0	0	0	0	1	undefined	58e7a43767f4f81000b4d22e
	false	undefined	0							undefined	0	58e7a48467f4f81000b4d2bd		false	76719	154	119	0	0	0	0	1	undefined	58e7a43767f4f81000b4d22e
	false	undefined	0							undefined	0	58e7a48467f4f81000b4d2be		false	77243	155	119	0	0	0	0	1	undefined	58e7a43767f4f81000b4d22e
	false	undefined	0							undefined	0	58e7a48567f4f81000b4d2bf		false	77787	156	114	0	0	0	0	1	undefined	58e7a43767f4f81000b4d22e
	false	undefined	0							undefined	0	58e7a48667f4f81000b4d2c0		false	78446	157	107	0	0	0	0	1	undefined	58e7a43767f4f81000b4d22e
	false	undefined	0							undefined	0	58e7a48667f4f81000b4d2c1		false	79008	158	106	0	0	0	0	1	undefined	58e7a43767f4f81000b4d22e
	false	undefined	0							undefined	0	58e7a48667f4f81000b4d2c2		false	79466	159	103	0	0	0	0	1	undefined	58e7a43767f4f81000b4d22e
	false	undefined	0							undefined	0	58e7a48767f4f81000b4d2c3		false	79996	160	105	0	0	0	0	1	undefined	58e7a43767f4f81000b4d22e
	false	undefined	0							undefined	0	58e7a48767f4f81000b4d2c4		false	80466	161	108	0	0	0	0	1	undefined	58e7a43767f4f81000b4d22e
	false	undefined	0							undefined	0	58e7a48867f4f81000b4d2c5		false	80981	162	114	0	0	0	0	1	undefined	58e7a43767f4f81000b4d22e
	false	undefined	0							undefined	0	58e7a48967f4f81000b4d2c6		false	81544	163	116	0	0	0	0	1	undefined	58e7a43767f4f81000b4d22e
	false	undefined	0							undefined	0	58e7a48967f4f81000b4d2c7		false	82072	164	113	0	0	0	0	1	undefined	58e7a43767f4f81000b4d22e
	false	undefined	0							undefined	0	58e7a48a67f4f81000b4d2c8		false	82598	165	111	0	0	0	0	1	undefined	58e7a43767f4f81000b4d22e
	false	undefined	0							undefined	0	58e7a48a67f4f81000b4d2c9		false	83144	166	107	0	0	0	0	1	undefined	58e7a43767f4f81000b4d22e
	false	undefined	0							undefined	0	58e7a48b67f4f81000b4d2ca		false	83746	167	110	0	0	0	0	1	undefined	58e7a43767f4f81000b4d22e
	false	undefined	0							undefined	0	58e7a48b67f4f81000b4d2cb		false	84267	168	110	0	0	0	0	1	undefined	58e7a43767f4f81000b4d22e
	false	undefined	0							undefined	0	58e7a48c67f4f81000b4d2cc		false	84804	169	110	0	0	0	0	1	undefined	58e7a43767f4f81000b4d22e
	false	undefined	0							undefined	0	58e7a48d67f4f81000b4d2cd		false	85420	170	112	0	0	0	0	1	undefined	58e7a43767f4f81000b4d22e
	false	undefined	0							undefined	0	58e7a48d67f4f81000b4d2ce		false	85923	171	112	0	0	0	0	1	undefined	58e7a43767f4f81000b4d22e
	false	undefined	0							undefined	0	58e7a48d67f4f81000b4d2cf		false	86394	172	114	0	0	0	0	1	undefined	58e7a43767f4f81000b4d22e
	false	undefined	0							undefined	0	58e7a48e67f4f81000b4d2d0		false	86948	173	117	0	0	0	0	1	undefined	58e7a43767f4f81000b4d22e
	false	undefined	0							undefined	0	58e7a48e67f4f81000b4d2d1		false	87466	174	122	0	0	0	0	1	undefined	58e7a43767f4f81000b4d22e
	false	undefined	0							undefined	0	58e7a48f67f4f81000b4d2d2		false	88000	175	122	0	0	0	0	1	undefined	58e7a43767f4f81000b4d22e
	false	undefined	0							undefined	0	58e7a48f67f4f81000b4d2d3		false	88544	176	121	0	0	0	0	1	undefined	58e7a43767f4f81000b4d22e
	false	undefined	0							undefined	0	58e7a49067f4f81000b4d2d4		false	89219	177	119	0	0	0	0	1	undefined	58e7a43767f4f81000b4d22e
	false	undefined	0							undefined	0	58e7a49167f4f81000b4d2d5		false	89778	178	120	0	0	0	0	1	undefined	58e7a43767f4f81000b4d22e
	false	undefined	0							undefined	0	58e7a49167f4f81000b4d2d6		false	90361	179	116	0	0	0	0	1	undefined	58e7a43767f4f81000b4d22e
	false	undefined	0							undefined	0	58e7a49267f4f81000b4d2d7		true	90880	180	107	0	0	0	0	1	undefined	58e7a43767f4f81000b4d22e
	false	undefined	0							undefined	0	58e7a49267f4f81000b4d2d8		true	91415	181	107	0	0	0	0	1	undefined	58e7a43767f4f81000b4d22e
	false	undefined	0							undefined	0	58e7a49367f4f81000b4d2d9		true	91959	182	107	0	0	0	0	1	undefined	58e7a43767f4f81000b4d22e
	false	undefined	0							undefined	0	58e7a49367f4f81000b4d2da		true	92488	183	107	0	0	0	0	1	undefined	58e7a43767f4f81000b4d22e
	false	undefined	0							undefined	0	58e7a49467f4f81000b4d2db		false	92956	184	124	0	0	0	0	1	undefined	58e7a43767f4f81000b4d22e
	false	undefined	0							undefined	0	58e7a49467f4f81000b4d2dc		false	93478	185	121	0	0	0	0	1	undefined	58e7a43767f4f81000b4d22e
	false	undefined	0							undefined	0	58e7a49567f4f81000b4d2dd		false	94011	186	124	0	0	0	0	1	undefined	58e7a43767f4f81000b4d22e
	false	undefined	0							undefined	0	58e7a49667f4f81000b4d2de		false	94573	187	125	0	0	0	0	1	undefined	58e7a43767f4f81000b4d22e
	false	undefined	0							undefined	0	58e7a49667f4f81000b4d2df		false	95057	188	123	0	0	0	0	1	undefined	58e7a43767f4f81000b4d22e
	false	undefined	0							undefined	0	58e7a49767f4f81000b4d2e0		false	95619	189	117	0	0	0	0	1	undefined	58e7a43767f4f81000b4d22e
	false	undefined	0							undefined	0	58e7a49767f4f81000b4d2e1		false	96154	190	113	0	0	0	0	1	undefined	58e7a43767f4f81000b4d22e
	false	undefined	0							undefined	0	58e7a49867f4f81000b4d2e2		false	96686	191	102	0	0	0	0	1	undefined	58e7a43767f4f81000b4d22e
	false	undefined	0							undefined	0	58e7a49867f4f81000b4d2e3		true	97211	192	99	0	0	0	0	1	undefined	58e7a43767f4f81000b4d22e
	false	undefined	0							undefined	0	58e7a49967f4f81000b4d2e4		true	97767	193	111	0	0	0	0	1	undefined	58e7a43767f4f81000b4d22e
	false	undefined	0							undefined	0	58e7a49967f4f81000b4d2e5		false	98298	194	118	0	0	0	0	1	undefined	58e7a43767f4f81000b4d22e
	false	undefined	0							undefined	0	58e7a49a67f4f81000b4d2e6		false	98789	195	120	0	0	0	0	1	undefined	58e7a43767f4f81000b4d22e
	false	undefined	0							undefined	0	58e7a49b67f4f81000b4d2e7		false	99351	196	116	0	0	0	0	1	undefined	58e7a43767f4f81000b4d22e
	false	undefined	0							undefined	0	58e7a49b67f4f81000b4d2e8		false	99915	197	110	0	0	0	0	1	undefined	58e7a43767f4f81000b4d22e
	false	undefined	0							undefined	0	58e7a49b67f4f81000b4d2e9		false	100371	198	106	0	0	0	0	1	undefined	58e7a43767f4f81000b4d22e
	false	undefined	0							undefined	0	58e7a49c67f4f81000b4d2ea		false	100901	199	106	0	0	0	0	1	undefined	58e7a43767f4f81000b4d22e
	false	undefined	0							undefined	0	58e7a49c67f4f81000b4d2eb		false	101437	200	106	0	0	0	0	1	undefined	58e7a43767f4f81000b4d22e
	false	undefined	0							undefined	0	58e7a49d67f4f81000b4d2ec		false	101984	201	109	0	0	0	0	1	undefined	58e7a43767f4f81000b4d22e
	false	undefined	0							undefined	0	58e7a49d67f4f81000b4d2ed		false	102520	202	110	0	0	0	0	1	undefined	58e7a43767f4f81000b4d22e
	false	undefined	0							undefined	0	58e7a49e67f4f81000b4d2ee		false	103053	203	109	0	0	0	0	1	undefined	58e7a43767f4f81000b4d22e
	false	undefined	0							undefined	0	58e7a49f67f4f81000b4d2ef		false	103646	204	103	0	0	0	0	1	undefined	58e7a43767f4f81000b4d22e
	false	undefined	0							undefined	0	58e7a49f67f4f81000b4d2f0		false	104176	205	103	0	0	0	0	1	undefined	58e7a43767f4f81000b4d22e
	false	undefined	0							undefined	0	58e7a4a067f4f81000b4d2f1		false	104707	206	106	0	0	0	0	1	undefined	58e7a43767f4f81000b4d22e
	false	undefined	0							undefined	0	58e7a4a067f4f81000b4d2f2		false	105255	207	112	0	0	0	0	1	undefined	58e7a43767f4f81000b4d22e
	false	undefined	0							undefined	0	58e7a4a167f4f81000b4d2f3		false	105785	208	114	0	0	0	0	1	undefined	58e7a43767f4f81000b4d22e
	false	undefined	0							undefined	0	58e7a4a167f4f81000b4d2f4		true	106309	209	106	0	0	0	0	1	undefined	58e7a43767f4f81000b4d22e
	false	undefined	0							undefined	0	58e7a4a267f4f81000b4d2f5		true	106847	210	100	0	0	0	0	1	undefined	58e7a43767f4f81000b4d22e
	false	undefined	0							undefined	0	58e7a4a367f4f81000b4d2f6		true	107397	211	105	0	0	0	0	1	undefined	58e7a43767f4f81000b4d22e
	false	undefined	0							undefined	0	58e7a4a467f4f81000b4d2f7		true	108594	212	111	0	0	0	0	1	undefined	58e7a43767f4f81000b4d22e
	false	undefined	0							undefined	0	58e7a4a467f4f81000b4d2f8		true	109117	214	112	0	0	0	0	1	undefined	58e7a43767f4f81000b4d22e
	false	undefined	0							undefined	0	58e7a4a567f4f81000b4d2f9		false	109515	215	114	0	0	0	0	1	undefined	58e7a43767f4f81000b4d22e
	false	undefined	0							undefined	0	58e7a4a567f4f81000b4d2fa		false	110205	216	113	0	0	0	0	1	undefined	58e7a43767f4f81000b4d22e
	false	undefined	0							undefined	0	58e7a4a567f4f81000b4d2fb		false	110530	217	112	0	0	0	0	1	undefined	58e7a43767f4f81000b4d22e
	false	undefined	0							undefined	0	58e7a4a667f4f81000b4d2fc		false	111128	218	115	0	0	0	0	1	undefined	58e7a43767f4f81000b4d22e
	false	undefined	0							undefined	0	58e7a4a767f4f81000b4d2fd		true	111662	219	121	0	0	0	0	1	undefined	58e7a43767f4f81000b4d22e
	false	undefined	0							undefined	0	58e7a4a767f4f81000b4d2fe		false	112193	220	122	0	0	0	0	1	undefined	58e7a43767f4f81000b4d22e
	false	undefined	0							undefined	0	58e7a4a867f4f81000b4d2ff		false	112717	221	121	0	0	0	0	1	undefined	58e7a43767f4f81000b4d22e
	false	undefined	0							undefined	0	58e7a4a867f4f81000b4d300		false	113273	222	126	0	0	0	0	1	undefined	58e7a43767f4f81000b4d22e
	false	undefined	0							undefined	0	58e7a4a967f4f81000b4d301		true	113804	223	129	0	0	0	0	1	undefined	58e7a43767f4f81000b4d22e
	false	undefined	0							undefined	0	58e7a4a967f4f81000b4d302		true	114332	224	-1	0	0	0	0	1	undefined	58e7a43767f4f81000b4d22e
	false	undefined	0							undefined	0	58e7a4aa67f4f81000b4d303		true	114862	225	-1	0	0	0	0	1	undefined	58e7a43767f4f81000b4d22e
	false	undefined	0							undefined	0	58e7a4aa67f4f81000b4d304		true	115409	226	-1	0	0	0	0	1	undefined	58e7a43767f4f81000b4d22e
	false	undefined	0							undefined	0	58e7a4ab67f4f81000b4d305		true	115998	230	-1	0	0	0	0	1	undefined	58e7a43767f4f81000b4d22e
	false	undefined	0							undefined	0	58e7a4ab67f4f81000b4d306		true	116537	231	119	0	0	0	0	1	undefined	58e7a43767f4f81000b4d22e
	false	undefined	0							undefined	0	58e7a4ac67f4f81000b4d307		false	117136	232	116	0	0	0	0	1	undefined	58e7a43767f4f81000b4d22e
	false	undefined	0							undefined	0	58e7a4ad67f4f81000b4d308		false	117666	233	113	0	0	0	0	1	undefined	58e7a43767f4f81000b4d22e
	false	undefined	0							undefined	0	58e7a4ad67f4f81000b4d309		false	118268	234	115	0	0	0	0	1	undefined	58e7a43767f4f81000b4d22e
	false	undefined	0							undefined	0	58e7a4ae67f4f81000b4d30a		false	118808	235	117	0	0	0	0	1	undefined	58e7a43767f4f81000b4d22e
	false	undefined	0							undefined	0	58e7a4ae67f4f81000b4d30b		false	119346	236	112	0	0	0	0	1	undefined	58e7a43767f4f81000b4d22e
	false	undefined	0							undefined	0	58e7a4af67f4f81000b4d30c		false	119886	237	108	0	0	0	0	1	undefined	58e7a43767f4f81000b4d22e
	false	undefined	0							undefined	0	58e7a4af67f4f81000b4d30d		false	120399	238	109	0	0	0	0	1	undefined	58e7a43767f4f81000b4d22e
	false	undefined	0							undefined	0	58e7a4b067f4f81000b4d30e		false	120921	239	111	0	0	0	0	1	undefined	58e7a43767f4f81000b4d22e
	false	undefined	0							undefined	0	58e7a4b167f4f81000b4d30f		false	121469	240	108	0	0	0	0	1	undefined	58e7a43767f4f81000b4d22e
	false	undefined	0							undefined	0	58e7a4b167f4f81000b4d310		false	122016	241	108	0	0	0	0	1	undefined	58e7a43767f4f81000b4d22e
	false	undefined	0							undefined	0	58e7a4b267f4f81000b4d311		false	122548	242	107	0	0	0	0	1	undefined	58e7a43767f4f81000b4d22e
	false	undefined	0							undefined	0	58e7a4b267f4f81000b4d312		false	123073	243	113	0	0	0	0	1	undefined	58e7a43767f4f81000b4d22e
	false	undefined	0							undefined	0	58e7a4b367f4f81000b4d313		false	123572	244	115	0	0	0	0	1	undefined	58e7a43767f4f81000b4d22e
	false	undefined	0							undefined	0	58e7a4b367f4f81000b4d314		false	124138	245	119	0	0	0	0	1	undefined	58e7a43767f4f81000b4d22e
	false	undefined	0							undefined	0	58e7a4b467f4f81000b4d315		false	124688	246	116	0	0	0	0	1	undefined	58e7a43767f4f81000b4d22e
	false	undefined	0							undefined	0	58e7a4b467f4f81000b4d316		false	125155	247	107	0	0	0	0	1	undefined	58e7a43767f4f81000b4d22e
	false	undefined	0							undefined	0	58e7a4b567f4f81000b4d317		false	125769	248	113	0	0	0	0	1	undefined	58e7a43767f4f81000b4d22e
	false	undefined	0							undefined	0	58e7a4b567f4f81000b4d318		false	126298	249	118	0	0	0	0	1	undefined	58e7a43767f4f81000b4d22e
	false	undefined	0							undefined	0	58e7a4b667f4f81000b4d319		false	126815	250	118	0	0	0	0	1	undefined	58e7a43767f4f81000b4d22e
	false	undefined	0							undefined	0	58e7a4b667f4f81000b4d31a		false	127347	251	116	0	0	0	0	1	undefined	58e7a43767f4f81000b4d22e
	false	undefined	0							undefined	0	58e7a4b767f4f81000b4d31b		false	127826	252	116	0	0	0	0	1	undefined	58e7a43767f4f81000b4d22e
	false	undefined	0							undefined	0	58e7a4b767f4f81000b4d31c		false	128358	253	120	0	0	0	0	1	undefined	58e7a43767f4f81000b4d22e
	false	undefined	0							undefined	0	58e7a4b867f4f81000b4d31d		false	128894	254	119	0	0	0	0	1	undefined	58e7a43767f4f81000b4d22e
	false	undefined	0							undefined	0	58e7a4b867f4f81000b4d31e		false	129422	255	119	0	0	0	0	1	undefined	58e7a43767f4f81000b4d22e
	false	undefined	0							undefined	0	58e7a4b967f4f81000b4d31f		true	129970	256	117	0	0	0	0	1	undefined	58e7a43767f4f81000b4d22e
	false	undefined	0							undefined	0	58e7a4b967f4f81000b4d320		true	130485	257	117	0	0	0	0	1	undefined	58e7a43767f4f81000b4d22e
	false	undefined	0							undefined	0	58e7a4ba67f4f81000b4d321		true	131030	258	117	0	0	0	0	1	undefined	58e7a43767f4f81000b4d22e
	false	undefined	0							undefined	0	58e7a4bb67f4f81000b4d322		true	131564	259	117	0	0	0	0	1	undefined	58e7a43767f4f81000b4d22e
	false	undefined	0							undefined	0	58e7a4bb67f4f81000b4d323		true	132020	260	104	0	0	0	0	1	undefined	58e7a43767f4f81000b4d22e
	false	undefined	0							undefined	0	58e7a4bc67f4f81000b4d324		true	132568	261	109	0	0	0	0	1	undefined	58e7a43767f4f81000b4d22e
	false	undefined	0							undefined	0	58e7a4bc67f4f81000b4d325		false	133112	262	110	0	0	0	0	1	undefined	58e7a43767f4f81000b4d22e
	false	undefined	0							undefined	0	58e7a4bd67f4f81000b4d326		false	133581	263	114	0	0	0	0	1	undefined	58e7a43767f4f81000b4d22e
	false	undefined	0							undefined	0	58e7a4bd67f4f81000b4d327		false	134108	264	120	0	0	0	0	1	undefined	58e7a43767f4f81000b4d22e
	false	undefined	0							undefined	0	58e7a4be67f4f81000b4d328		false	134649	265	123	0	0	0	0	1	undefined	58e7a43767f4f81000b4d22e
	false	undefined	0							undefined	0	58e7a4be67f4f81000b4d329		false	135245	266	122	0	0	0	0	1	undefined	58e7a43767f4f81000b4d22e
	false	undefined	0							undefined	0	58e7a4bf67f4f81000b4d32a		false	135796	267	118	0	0	0	0	1	undefined	58e7a43767f4f81000b4d22e
	false	undefined	0							undefined	0	58e7a4bf67f4f81000b4d32b		false	136307	268	119	0	0	0	0	1	undefined	58e7a43767f4f81000b4d22e
	false	undefined	0							undefined	0	58e7a4c067f4f81000b4d32c		false	136847	269	123	0	0	0	0	1	undefined	58e7a43767f4f81000b4d22e
	false	undefined	0							undefined	0	58e7a4c067f4f81000b4d32d		false	137339	270	125	0	0	0	0	1	undefined	58e7a43767f4f81000b4d22e
	false	undefined	0							undefined	0	58e7a4c167f4f81000b4d32e		false	137847	271	122	0	0	0	0	1	undefined	58e7a43767f4f81000b4d22e
	false	undefined	0							undefined	0	58e7a4c167f4f81000b4d32f		false	138443	272	120	0	0	0	0	1	undefined	58e7a43767f4f81000b4d22e
	false	undefined	0							undefined	0	58e7a4c267f4f81000b4d330		false	138918	273	122	0	0	0	0	1	undefined	58e7a43767f4f81000b4d22e
	false	undefined	0							undefined	0	58e7a4c267f4f81000b4d331		true	139427	274	122	0	0	0	0	1	undefined	58e7a43767f4f81000b4d22e
	false	undefined	0							undefined	0	58e7a4c367f4f81000b4d332		true	140106	275	125	0	0	0	0	1	undefined	58e7a43767f4f81000b4d22e
	false	undefined	0							undefined	0	58e7a4c467f4f81000b4d333		false	140590	276	129	0	0	0	0	1	undefined	58e7a43767f4f81000b4d22e
	false	undefined	0							undefined	0	58e7a4c467f4f81000b4d334		false	141054	277	130	0	0	0	0	1	undefined	58e7a43767f4f81000b4d22e
	false	undefined	0							undefined	0	58e7a4c567f4f81000b4d335		true	141650	278	-1	0	0	0	0	1	undefined	58e7a43767f4f81000b4d22e
	false	undefined	0							undefined	0	58e7a4c567f4f81000b4d336		true	142187	279	-1	0	0	0	0	1	undefined	58e7a43767f4f81000b4d22e
	false	undefined	0							undefined	0	58e7a4c667f4f81000b4d337		true	142717	280	-1	0	0	0	0	1	undefined	58e7a43767f4f81000b4d22e
	false	undefined	0							undefined	0	58e7a4c667f4f81000b4d338		true	143235	284	-1	0	0	0	0	1	undefined	58e7a43767f4f81000b4d22e
	false	undefined	0							undefined	0	58e7a4c767f4f81000b4d339		true	143811	285	91	0	0	0	0	1	undefined	58e7a43767f4f81000b4d22e
	false	undefined	0							undefined	0	58e7a4c767f4f81000b4d33a		true	144329	286	-1	0	0	0	0	1	undefined	58e7a43767f4f81000b4d22e
	false	undefined	0							undefined	0	58e7a4c867f4f81000b4d33b		true	144821	287	-1	0	0	0	0	1	undefined	58e7a43767f4f81000b4d22e
	false	undefined	0							undefined	0	58e7a4c867f4f81000b4d33c		true	145389	288	-1	0	0	0	0	1	undefined	58e7a43767f4f81000b4d22e
	false	undefined	0							undefined	0	58e7a4c967f4f81000b4d33d		true	145854	289	-1	0	0	0	0	1	undefined	58e7a43767f4f81000b4d22e
	false	undefined	0							undefined	0	58e7a4c967f4f81000b4d33e		true	146386	290	-1	0	0	0	0	1	undefined	58e7a43767f4f81000b4d22e
	false	undefined	0							undefined	0	58e7a4ca67f4f81000b4d33f		false	146907	291	54	0	0	0	0	1	undefined	58e7a43767f4f81000b4d22e
	false	undefined	0							undefined	0	58e7a4ca67f4f81000b4d340		false	147390	292	55	0	0	0	0	1	undefined	58e7a43767f4f81000b4d22e
	false	undefined	0							undefined	0	58e7a4cb67f4f81000b4d341		true	147935	293	55	0	0	0	0	1	undefined	58e7a43767f4f81000b4d22e
	false	undefined	0							undefined	0	58e7a4cc67f4f81000b4d342		true	148466	297	55	0	0	0	0	1	undefined	58e7a43767f4f81000b4d22e
	false	undefined	0							undefined	0	58e7a4cc67f4f81000b4d343		false	149002	298	59	0	0	0	0	1	undefined	58e7a43767f4f81000b4d22e
	false	undefined	0							undefined	0	58e7a4cc67f4f81000b4d344		false	149524	299	69	0	0	0	0	1	undefined	58e7a43767f4f81000b4d22e
	false	undefined	0							undefined	0	58e7a4cd67f4f81000b4d345		false	150074	300	74	0	0	0	0	1	undefined	58e7a43767f4f81000b4d22e
	false	undefined	0							undefined	0	58e7a4cd67f4f81000b4d346		false	150540	301	66	0	0	0	0	1	undefined	58e7a43767f4f81000b4d22e
	false	undefined	0							undefined	0	58e7a4ce67f4f81000b4d347		false	151058	302	48	0	0	0	0	1	undefined	58e7a43767f4f81000b4d22e
	false	undefined	0							undefined	0	58e7a4cf67f4f81000b4d348		false	151597	312	56	0	0	0	0	1	undefined	58e7a43767f4f81000b4d22e
	false	undefined	0							undefined	0	58e7a4cf67f4f81000b4d349		false	152402	313	60	0	0	0	0	1	undefined	58e7a43767f4f81000b4d22e
	false	undefined	0							undefined	0	58e7a4d067f4f81000b4d34a		false	152814	314	60	0	0	0	0	1	undefined	58e7a43767f4f81000b4d22e
	false	undefined	0							undefined	0	58e7a4d067f4f81000b4d34b		true	153201	315	60	0	0	0	0	1	undefined	58e7a43767f4f81000b4d22e
	false	undefined	0							undefined	0	58e7a4d167f4f81000b4d34c		true	153749	316	119	0	0	0	0	1	undefined	58e7a43767f4f81000b4d22e
	false	undefined	0							undefined	0	58e7a4d167f4f81000b4d34d		true	154278	317	118	0	0	0	0	1	undefined	58e7a43767f4f81000b4d22e
	false	undefined	0							undefined	0	58e7a4d267f4f81000b4d34e		true	154816	318	-1	0	0	0	0	1	undefined	58e7a43767f4f81000b4d22e
	false	undefined	0							undefined	0	58e7a4d267f4f81000b4d34f		true	155333	319	-1	0	0	0	0	1	undefined	58e7a43767f4f81000b4d22e
	false	undefined	0							undefined	0	58e7a4d367f4f81000b4d350		true	155879	320	-1	0	0	0	0	1	undefined	58e7a43767f4f81000b4d22e
	false	undefined	0							undefined	0	58e7a4d367f4f81000b4d351		true	156416	321	-1	0	0	0	0	1	undefined	58e7a43767f4f81000b4d22e
	false	undefined	0							undefined	0	58e7a4d467f4f81000b4d352		false	157013	322	68	0	0	0	0	1	undefined	58e7a43767f4f81000b4d22e
	false	undefined	0							undefined	0	58e7a4d467f4f81000b4d353		true	157559	323	82	0	0	0	0	1	undefined	58e7a43767f4f81000b4d22e
	false	undefined	0							undefined	0	58e7a4d567f4f81000b4d354		true	158155	324	-1	0	0	0	0	1	undefined	58e7a43767f4f81000b4d22e
	false	undefined	0							undefined	0	58e7a4d667f4f81000b4d355		false	158688	328	-1	0	0	0	0	1	undefined	58e7a43767f4f81000b4d22e
	false	undefined	0							undefined	0	58e7a4d667f4f81000b4d356		false	159237	329	-1	0	0	0	0	1	undefined	58e7a43767f4f81000b4d22e
	false	undefined	0							undefined	0	58e7a4d767f4f81000b4d357		false	159812	330	-1	0	0	0	0	1	undefined	58e7a43767f4f81000b4d22e
	false	undefined	0							undefined	0	58e7a4d767f4f81000b4d358		false	160340	331	-1	0	0	0	0	1	undefined	58e7a43767f4f81000b4d22e
	false	undefined	0							undefined	0	58e7a4d867f4f81000b4d359		false	160898	332	-1	0	0	0	0	1	undefined	58e7a43767f4f81000b4d22e
	false	undefined	0							undefined	0	58e7a4d967f4f81000b4d35a		false	161430	333	-1	0	0	0	0	1	undefined	58e7a43767f4f81000b4d22e
	false	undefined	0							undefined	0	58e7a4d967f4f81000b4d35b		false	161974	334	-1	0	0	0	0	1	undefined	58e7a43767f4f81000b4d22e
	false	undefined	0							undefined	0	58e7a4da67f4f81000b4d35c		true	162426	335	70	0	0	0	0	1	undefined	58e7a43767f4f81000b4d22e
	false	undefined	0							undefined	0	58e7a4da67f4f81000b4d35d		true	163031	336	-1	0	0	0	0	1	undefined	58e7a43767f4f81000b4d22e
	false	undefined	0							undefined	0	58e7a4da67f4f81000b4d35e		true	163549	337	54	0	0	0	0	1	undefined	58e7a43767f4f81000b4d22e
	false	undefined	0							undefined	0	58e7a4db67f4f81000b4d35f		true	164088	338	44	0	0	0	0	1	undefined	58e7a43767f4f81000b4d22e
	false	undefined	0							undefined	0	58e7a4dc67f4f81000b4d360		true	164641	339	44	0	0	0	0	1	undefined	58e7a43767f4f81000b4d22e
	false	undefined	0							undefined	0	58e7a4dc67f4f81000b4d361		true	165240	340	43	0	0	0	0	1	undefined	58e7a43767f4f81000b4d22e
	false	undefined	0							undefined	0	58e7a4dd67f4f81000b4d362		true	165768	341	58	0	0	0	0	1	undefined	58e7a43767f4f81000b4d22e
	false	undefined	0							undefined	0	58e7a4dd67f4f81000b4d363		false	166297	342	38	0	0	0	0	1	undefined	58e7a43767f4f81000b4d22e
	false	undefined	0							undefined	0	58e7a4de67f4f81000b4d364		false	166889	343	38	0	0	0	0	1	undefined	58e7a43767f4f81000b4d22e
	false	undefined	0							undefined	0	58e7a4de67f4f81000b4d365		false	167424	344	38	0	0	0	0	1	undefined	58e7a43767f4f81000b4d22e
	false	undefined	0							undefined	0	58e7a4df67f4f81000b4d366		false	167960	345	50	0	0	0	0	1	undefined	58e7a43767f4f81000b4d22e
	false	undefined	0							undefined	0	58e7a4e067f4f81000b4d367		false	168505	355	47	0	0	0	0	1	undefined	58e7a43767f4f81000b4d22e
	false	undefined	0							undefined	0	58e7a4e067f4f81000b4d368		false	169043	356	49	0	0	0	0	1	undefined	58e7a43767f4f81000b4d22e
	false	undefined	0							undefined	0	58e7a4e167f4f81000b4d369		false	169638	357	49	0	0	0	0	1	undefined	58e7a43767f4f81000b4d22e
	false	undefined	0							undefined	0	58e7a4e167f4f81000b4d36a		true	170181	358	59	0	0	0	0	1	undefined	58e7a43767f4f81000b4d22e
	false	undefined	0							undefined	0	58e7a4e267f4f81000b4d36b		true	170705	359	59	0	0	0	0	1	undefined	58e7a43767f4f81000b4d22e
	false	undefined	0							undefined	0	58e7a4e267f4f81000b4d36c		true	171248	360	59	0	0	0	0	1	undefined	58e7a43767f4f81000b4d22e
	false	undefined	0							undefined	0	58e7a4e367f4f81000b4d36d		true	171765	361	59	0	0	0	0	1	undefined	58e7a43767f4f81000b4d22e
	false	undefined	0							undefined	0	58e7a4e367f4f81000b4d36e		false	172314	362	121	0	0	0	0	1	undefined	58e7a43767f4f81000b4d22e
	false	undefined	0							undefined	0	58e7a4e467f4f81000b4d36f		false	172832	363	121	0	0	0	0	1	undefined	58e7a43767f4f81000b4d22e
	false	undefined	0							undefined	0	58e7a4e467f4f81000b4d370		false	173326	364	124	0	0	0	0	1	undefined	58e7a43767f4f81000b4d22e
	false	undefined	0							undefined	0	58e7a4e567f4f81000b4d371		false	173926	365	122	0	0	0	0	1	undefined	58e7a43767f4f81000b4d22e
	false	undefined	0							undefined	0	58e7a4e567f4f81000b4d372		false	174447	366	115	0	0	0	0	1	undefined	58e7a43767f4f81000b4d22e
	false	undefined	0							undefined	0	58e7a4e667f4f81000b4d373		false	174920	367	107	0	0	0	0	1	undefined	58e7a43767f4f81000b4d22e
	false	undefined	0							undefined	0	58e7a4e767f4f81000b4d374		false	175537	368	106	0	0	0	0	1	undefined	58e7a43767f4f81000b4d22e
	false	undefined	0							undefined	0	58e7a4e767f4f81000b4d375		false	176057	369	111	0	0	0	0	1	undefined	58e7a43767f4f81000b4d22e
	false	undefined	0							undefined	0	58e7a4e867f4f81000b4d376		false	176588	370	115	0	0	0	0	1	undefined	58e7a43767f4f81000b4d22e
	false	undefined	0							undefined	0	58e7a4e867f4f81000b4d377		false	177124	371	115	0	0	0	0	1	undefined	58e7a43767f4f81000b4d22e
	false	undefined	0							undefined	0	58e7a4e967f4f81000b4d378		false	177665	372	114	0	0	0	0	1	undefined	58e7a43767f4f81000b4d22e
	false	undefined	0							undefined	0	58e7a4e967f4f81000b4d379		false	178179	373	114	0	0	0	0	1	undefined	58e7a43767f4f81000b4d22e
	false	undefined	0							undefined	0	58e7a4ea67f4f81000b4d37a		false	178649	374	113	0	0	0	0	1	undefined	58e7a43767f4f81000b4d22e
	false	undefined	0							undefined	0	58e7a4ea67f4f81000b4d37b		false	179183	375	115	0	0	0	0	1	undefined	58e7a43767f4f81000b4d22e
	false	undefined	0							undefined	0	58e7a4eb67f4f81000b4d37c		false	179778	376	115	0	0	0	0	1	undefined	58e7a43767f4f81000b4d22e
	false	undefined	0							undefined	0	58e7a4eb67f4f81000b4d37d		false	180194	377	117	0	0	0	0	1	undefined	58e7a43767f4f81000b4d22e
	false	undefined	0							undefined	0	58e7a4ec67f4f81000b4d37e		false	180737	378	116	0	0	0	0	1	undefined	58e7a43767f4f81000b4d22e
	false	undefined	0							undefined	0	58e7a4ec67f4f81000b4d37f		false	181269	379	113	0	0	0	0	1	undefined	58e7a43767f4f81000b4d22e
	false	undefined	0							undefined	0	58e7a4ed67f4f81000b4d380		false	181799	380	117	0	0	0	0	1	undefined	58e7a43767f4f81000b4d22e
	false	undefined	0							undefined	0	58e7a4ed67f4f81000b4d381		false	182268	381	114	0	0	0	0	1	undefined	58e7a43767f4f81000b4d22e
	false	undefined	0							undefined	0	58e7a4ee67f4f81000b4d382		false	182795	382	113	0	0	0	0	1	undefined	58e7a43767f4f81000b4d22e
	false	undefined	0							undefined	0	58e7a4ee67f4f81000b4d383		false	183333	383	112	0	0	0	0	1	undefined	58e7a43767f4f81000b4d22e
	false	undefined	0							undefined	0	58e7a4ef67f4f81000b4d384		false	183880	384	115	0	0	0	0	1	undefined	58e7a43767f4f81000b4d22e
	false	undefined	0							undefined	0	58e7a4ef67f4f81000b4d385		false	184408	385	120	0	0	0	0	1	undefined	58e7a43767f4f81000b4d22e
	false	undefined	0							undefined	0	58e7a4f067f4f81000b4d386		false	184937	386	119	0	0	0	0	1	undefined	58e7a43767f4f81000b4d22e
	false	undefined	0							undefined	0	58e7a4f067f4f81000b4d387		false	185476	387	120	0	0	0	0	1	undefined	58e7a43767f4f81000b4d22e
	false	undefined	0							undefined	0	58e7a4f167f4f81000b4d388		false	185943	388	116	0	0	0	0	1	undefined	58e7a43767f4f81000b4d22e
	false	undefined	0							undefined	0	58e7a4f167f4f81000b4d389		false	186487	389	113	0	0	0	0	1	undefined	58e7a43767f4f81000b4d22e
	false	undefined	0							undefined	0	58e7a4f267f4f81000b4d38a		false	187061	390	115	0	0	0	0	1	undefined	58e7a43767f4f81000b4d22e
	false	undefined	0							undefined	0	58e7a4f367f4f81000b4d38b		false	187626	391	112	0	0	0	0	1	undefined	58e7a43767f4f81000b4d22e
	false	undefined	0							undefined	0	58e7a4f367f4f81000b4d38c		false	188213	392	115	0	0	0	0	1	undefined	58e7a43767f4f81000b4d22e
	false	undefined	0							undefined	0	58e7a4f467f4f81000b4d38d		true	188747	393	106	0	0	0	0	1	undefined	58e7a43767f4f81000b4d22e
	false	undefined	0							undefined	0	58e7a4f467f4f81000b4d38e		true	189280	394	80	0	0	0	0	1	undefined	58e7a43767f4f81000b4d22e
	false	undefined	0							undefined	0	58e7a4f567f4f81000b4d38f		true	189807	395	78	0	0	0	0	1	undefined	58e7a43767f4f81000b4d22e
	false	undefined	0							undefined	0	58e7a4f567f4f81000b4d390		true	190272	396	-1	0	0	0	0	1	undefined	58e7a43767f4f81000b4d22e
	false	undefined	0							undefined	0	58e7a4f667f4f81000b4d391		true	190877	397	-1	0	0	0	0	1	undefined	58e7a43767f4f81000b4d22e
	false	undefined	0							undefined	0	58e7a4f667f4f81000b4d392		true	191424	398	-1	0	0	0	0	1	undefined	58e7a43767f4f81000b4d22e
	false	undefined	0							undefined	0	58e7a4f767f4f81000b4d393		true	191955	399	126	0	0	0	0	1	undefined	58e7a43767f4f81000b4d22e
	false	undefined	0							undefined	0	58e7a4f767f4f81000b4d394		false	192485	400	129	0	0	0	0	1	undefined	58e7a43767f4f81000b4d22e
	false	undefined	0							undefined	0	58e7a4f867f4f81000b4d395		false	193023	401	127	0	0	0	0	1	undefined	58e7a43767f4f81000b4d22e
	false	undefined	0							undefined	0	58e7a4f967f4f81000b4d396		false	193550	402	124	0	0	0	0	1	undefined	58e7a43767f4f81000b4d22e
	false	undefined	0							undefined	0	58e7a4f967f4f81000b4d397		false	194088	403	113	0	0	0	0	1	undefined	58e7a43767f4f81000b4d22e
	false	undefined	0							undefined	0	58e7a4fa67f4f81000b4d398		false	194634	404	112	0	0	0	0	1	undefined	58e7a43767f4f81000b4d22e
	false	undefined	0							undefined	0	58e7a4fa67f4f81000b4d399		false	195164	405	112	0	0	0	0	1	undefined	58e7a43767f4f81000b4d22e
	false	undefined	0							undefined	0	58e7a4fb67f4f81000b4d39a		true	195683	406	110	0	0	0	0	1	undefined	58e7a43767f4f81000b4d22e
	false	undefined	0							undefined	0	58e7a4fb67f4f81000b4d39b		false	196232	407	106	0	0	0	0	1	undefined	58e7a43767f4f81000b4d22e
	false	undefined	0							undefined	0	58e7a4fc67f4f81000b4d39c		false	196708	408	114	0	0	0	0	1	undefined	58e7a43767f4f81000b4d22e
	false	undefined	0							undefined	0	58e7a4fc67f4f81000b4d39d		false	197214	409	121	0	0	0	0	1	undefined	58e7a43767f4f81000b4d22e
	false	undefined	0							undefined	0	58e7a4fd67f4f81000b4d39e		false	197777	410	122	0	0	0	0	1	undefined	58e7a43767f4f81000b4d22e
	false	undefined	0							undefined	0	58e7a4fd67f4f81000b4d39f		false	198311	411	114	0	0	0	0	1	undefined	58e7a43767f4f81000b4d22e
	false	undefined	0							undefined	0	58e7a4fe67f4f81000b4d3a0		false	198835	412	108	0	0	0	0	1	undefined	58e7a43767f4f81000b4d22e
	false	undefined	0							undefined	0	58e7a4fe67f4f81000b4d3a1		true	199434	413	101	0	0	0	0	1	undefined	58e7a43767f4f81000b4d22e
	false	undefined	0							undefined	0	58e7a4ff67f4f81000b4d3a2		true	199887	414	86	0	0	0	0	1	undefined	58e7a43767f4f81000b4d22e
	false	undefined	0							undefined	0	58e7a4ff67f4f81000b4d3a3		true	200489	415	77	0	0	0	0	1	undefined	58e7a43767f4f81000b4d22e
	false	undefined	0							undefined	0	58e7a50067f4f81000b4d3a4		true	200978	416	-1	0	0	0	0	1	undefined	58e7a43767f4f81000b4d22e
	false	undefined	0							undefined	0	58e7a50167f4f81000b4d3a5		true	201510	417	111	0	0	0	0	1	undefined	58e7a43767f4f81000b4d22e
	false	undefined	0							undefined	0	58e7a50167f4f81000b4d3a6		false	202109	418	112	0	0	0	0	1	undefined	58e7a43767f4f81000b4d22e
	false	undefined	0							undefined	0	58e7a50267f4f81000b4d3a7		true	202627	419	115	0	0	0	0	1	undefined	58e7a43767f4f81000b4d22e
	false	undefined	0							undefined	0	58e7a50267f4f81000b4d3a8		true	203199	423	110	0	0	0	0	1	undefined	58e7a43767f4f81000b4d22e
	false	undefined	0							undefined	0	58e7a50367f4f81000b4d3a9		true	203706	424	113	0	0	0	0	1	undefined	58e7a43767f4f81000b4d22e
	false	undefined	0							undefined	0	58e7a50367f4f81000b4d3aa		true	204329	425	118	0	0	0	0	1	undefined	58e7a43767f4f81000b4d22e
	false	undefined	0							undefined	0	58e7a50467f4f81000b4d3ab		true	204716	426	123	0	0	0	0	1	undefined	58e7a43767f4f81000b4d22e
	false	undefined	0							undefined	0	58e7a50467f4f81000b4d3ac		true	205339	427	119	0	0	0	0	1	undefined	58e7a43767f4f81000b4d22e
	false	undefined	0							undefined	0	58e7a50567f4f81000b4d3ad		true	205778	428	114	0	0	0	0	1	undefined	58e7a43767f4f81000b4d22e
	false	undefined	0							undefined	0	58e7a50567f4f81000b4d3ae		true	206378	429	115	0	0	0	0	1	undefined	58e7a43767f4f81000b4d22e
	false	undefined	0							undefined	0	58e7a50667f4f81000b4d3af		true	206844	430	111	0	0	0	0	1	undefined	58e7a43767f4f81000b4d22e
	false	undefined	0							undefined	0	58e7a50667f4f81000b4d3b0		true	207393	431	111	0	0	0	0	1	undefined	58e7a43767f4f81000b4d22e
	false	undefined	0							undefined	0	58e7a50767f4f81000b4d3b1		false	207911	432	105	0	0	0	0	1	undefined	58e7a43767f4f81000b4d22e
	false	undefined	0							undefined	0	58e7a50767f4f81000b4d3b2		true	208449	433	109	0	0	0	0	1	undefined	58e7a43767f4f81000b4d22e
	false	undefined	0							undefined	0	58e7a50867f4f81000b4d3b3		true	208972	434	111	0	0	0	0	1	undefined	58e7a43767f4f81000b4d22e
	false	undefined	0							undefined	0	58e7a50967f4f81000b4d3b4		true	209517	435	112	0	0	0	0	1	undefined	58e7a43767f4f81000b4d22e
	false	undefined	0							undefined	0	58e7a50967f4f81000b4d3b5		true	210129	436	117	0	0	0	0	1	undefined	58e7a43767f4f81000b4d22e
	false	undefined	0							undefined	0	58e7a50a67f4f81000b4d3b6		false	210658	437	119	0	0	0	0	1	undefined	58e7a43767f4f81000b4d22e
	false	undefined	0							undefined	0	58e7a50a67f4f81000b4d3b7		true	211194	438	118	0	0	0	0	1	undefined	58e7a43767f4f81000b4d22e
	false	undefined	0							undefined	0	58e7a50b67f4f81000b4d3b8		true	211731	439	114	0	0	0	0	1	undefined	58e7a43767f4f81000b4d22e
	false	undefined	0							undefined	0	58e7a50b67f4f81000b4d3b9		false	212238	440	110	0	0	0	0	1	undefined	58e7a43767f4f81000b4d22e
	false	undefined	0							undefined	0	58e7a50c67f4f81000b4d3ba		false	212724	441	106	0	0	0	0	1	undefined	58e7a43767f4f81000b4d22e
	false	undefined	0							undefined	0	58e7a50c67f4f81000b4d3bb		false	213269	442	108	0	0	0	0	1	undefined	58e7a43767f4f81000b4d22e
	false	undefined	0							undefined	0	58e7a50d67f4f81000b4d3bc		false	213797	443	111	0	0	0	0	1	undefined	58e7a43767f4f81000b4d22e
	false	undefined	0							undefined	0	58e7a50d67f4f81000b4d3bd		true	214468	444	109	0	0	0	0	1	undefined	58e7a43767f4f81000b4d22e
	false	undefined	0							undefined	0	58e7a50e67f4f81000b4d3be		true	215001	445	113	0	0	0	0	1	undefined	58e7a43767f4f81000b4d22e
	false	undefined	0							undefined	0	58e7a50f67f4f81000b4d3bf		false	215862	446	110	0	0	0	0	1	undefined	58e7a43767f4f81000b4d22e
	false	undefined	0							undefined	0	58e7a51067f4f81000b4d3c0		true	216604	448	109	0	0	0	0	1	undefined	58e7a43767f4f81000b4d22e
	false	undefined	0							undefined	0	58e7a51067f4f81000b4d3c1		false	217137	449	112	0	0	0	0	1	undefined	58e7a43767f4f81000b4d22e
	false	undefined	0							undefined	0	58e7a51167f4f81000b4d3c2		false	217664	450	115	0	0	0	0	1	undefined	58e7a43767f4f81000b4d22e
	false	undefined	0							undefined	0	58e7a51167f4f81000b4d3c3		false	218284	451	113	0	0	0	0	1	undefined	58e7a43767f4f81000b4d22e
	false	undefined	0							undefined	0	58e7a51267f4f81000b4d3c4		false	218816	452	116	0	0	0	0	1	undefined	58e7a43767f4f81000b4d22e
	false	undefined	0							undefined	0	58e7a51267f4f81000b4d3c5		false	219328	453	115	0	0	0	0	1	undefined	58e7a43767f4f81000b4d22e
	false	undefined	0							undefined	0	58e7a51367f4f81000b4d3c6		false	219862	454	119	0	0	0	0	1	undefined	58e7a43767f4f81000b4d22e
	false	undefined	0							undefined	0	58e7a51367f4f81000b4d3c7		false	220328	455	119	0	0	0	0	1	undefined	58e7a43767f4f81000b4d22e
	false	undefined	0							undefined	0	58e7a51467f4f81000b4d3c8		false	220881	456	117	0	0	0	0	1	undefined	58e7a43767f4f81000b4d22e
	false	undefined	0							undefined	0	58e7a51467f4f81000b4d3c9		false	221404	457	113	0	0	0	0	1	undefined	58e7a43767f4f81000b4d22e
	false	undefined	0							undefined	0	58e7a51567f4f81000b4d3ca		false	221950	458	112	0	0	0	0	1	undefined	58e7a43767f4f81000b4d22e
	false	undefined	0							undefined	0	58e7a51667f4f81000b4d3cb		false	222485	459	103	0	0	0	0	1	undefined	58e7a43767f4f81000b4d22e
	false	undefined	0							undefined	0	58e7a51667f4f81000b4d3cc		false	223007	460	97	0	0	0	0	1	undefined	58e7a43767f4f81000b4d22e
	false	undefined	0							undefined	0	58e7a51767f4f81000b4d3cd		false	223629	461	96	0	0	0	0	1	undefined	58e7a43767f4f81000b4d22e
	false	undefined	0							undefined	0	58e7a51767f4f81000b4d3ce		false	224148	462	101	0	0	0	0	1	undefined	58e7a43767f4f81000b4d22e
	false	undefined	0							undefined	0	58e7a51867f4f81000b4d3cf		false	224682	463	108	0	0	0	0	1	undefined	58e7a43767f4f81000b4d22e
	false	undefined	0							undefined	0	58e7a51867f4f81000b4d3d0		false	225226	464	111	0	0	0	0	1	undefined	58e7a43767f4f81000b4d22e
	false	undefined	0							undefined	0	58e7a51967f4f81000b4d3d1		false	225756	465	114	0	0	0	0	1	undefined	58e7a43767f4f81000b4d22e
	false	undefined	0							undefined	0	58e7a51a67f4f81000b4d3d2		false	226248	466	119	0	0	0	0	1	undefined	58e7a43767f4f81000b4d22e
	false	undefined	0							undefined	0	58e7a51a67f4f81000b4d3d3		false	227106	467	125	0	0	0	0	1	undefined	58e7a43767f4f81000b4d22e
	false	undefined	0							undefined	0	58e7a51b67f4f81000b4d3d4		false	227618	468	130	0	0	0	0	1	undefined	58e7a43767f4f81000b4d22e
	false	undefined	0							undefined	0	58e7a51b67f4f81000b4d3d5		true	228233	469	94	0	0	0	0	1	undefined	58e7a43767f4f81000b4d22e
	false	undefined	0							undefined	0	58e7a51c67f4f81000b4d3d6		true	228895	471	91	0	0	0	0	1	undefined	58e7a43767f4f81000b4d22e
	false	undefined	0							undefined	0	58e7a51c67f4f81000b4d3d7		true	229426	472	95	0	0	0	0	1	undefined	58e7a43767f4f81000b4d22e
	false	undefined	0							undefined	0	58e7a51d67f4f81000b4d3d8		true	229954	476	96	0	0	0	0	1	undefined	58e7a43767f4f81000b4d22e
	false	undefined	0							undefined	0	58e7a51e67f4f81000b4d3d9		true	230627	477	99	0	0	0	0	1	undefined	58e7a43767f4f81000b4d22e
	false	undefined	0							undefined	0	58e7a51f67f4f81000b4d3da		true	231172	478	118	0	0	0	0	1	undefined	58e7a43767f4f81000b4d22e
	false	undefined	0							undefined	0	58e7a51f67f4f81000b4d3db		false	231970	479	117	0	0	0	0	1	undefined	58e7a43767f4f81000b4d22e
	false	undefined	0							undefined	0	58e7a51f67f4f81000b4d3dc		false	232428	480	116	0	0	0	0	1	undefined	58e7a43767f4f81000b4d22e
	false	undefined	0							undefined	0	58e7a52067f4f81000b4d3dd		false	232839	481	110	0	0	0	0	1	undefined	58e7a43767f4f81000b4d22e
	false	undefined	0							undefined	0	58e7a52067f4f81000b4d3de		false	233375	482	111	0	0	0	0	1	undefined	58e7a43767f4f81000b4d22e
	false	undefined	0							undefined	0	58e7a52167f4f81000b4d3df		false	233826	483	115	0	0	0	0	1	undefined	58e7a43767f4f81000b4d22e
	false	undefined	0							undefined	0	58e7a52167f4f81000b4d3e0		false	234374	484	123	0	0	0	0	1	undefined	58e7a43767f4f81000b4d22e
	false	undefined	0							undefined	0	58e7a52267f4f81000b4d3e1		false	234923	485	131	0	0	0	0	1	undefined	58e7a43767f4f81000b4d22e
	false	undefined	0							undefined	0	58e7a52267f4f81000b4d3e2		true	235521	486	125	0	0	0	0	1	undefined	58e7a43767f4f81000b4d22e
	false	undefined	0							undefined	0	58e7a52367f4f81000b4d3e3		true	236166	487	73	0	0	0	0	1	undefined	58e7a43767f4f81000b4d22e
	false	undefined	0							undefined	0	58e7a52467f4f81000b4d3e4		true	236753	488	69	0	0	0	0	1	undefined	58e7a43767f4f81000b4d22e
	false	undefined	0							undefined	0	58e7a52467f4f81000b4d3e5		true	237246	489	65	0	0	0	0	1	undefined	58e7a43767f4f81000b4d22e
	false	undefined	0							undefined	0	58e7a52567f4f81000b4d3e6		true	237777	493	90	0	0	0	0	1	undefined	58e7a43767f4f81000b4d22e
	false	undefined	0							undefined	0	58e7a52567f4f81000b4d3e7		true	238307	494	-1	0	0	0	0	1	undefined	58e7a43767f4f81000b4d22e
	false	undefined	0							undefined	0	58e7a52667f4f81000b4d3e8		true	238840	495	112	0	0	0	0	1	undefined	58e7a43767f4f81000b4d22e
	false	undefined	0							undefined	0	58e7a52667f4f81000b4d3e9		false	239367	496	110	0	0	0	0	1	undefined	58e7a43767f4f81000b4d22e
	false	undefined	0							undefined	0	58e7a52767f4f81000b4d3ea		false	239857	497	100	0	0	0	0	1	undefined	58e7a43767f4f81000b4d22e
	false	undefined	0							undefined	0	58e7a52767f4f81000b4d3eb		true	240447	498	108	0	0	0	0	1	undefined	58e7a43767f4f81000b4d22e
	false	undefined	0							undefined	0	58e7a52867f4f81000b4d3ec		false	240990	499	116	0	0	0	0	1	undefined	58e7a43767f4f81000b4d22e
	false	undefined	0							undefined	0	58e7a52867f4f81000b4d3ed		false	241515	500	115	0	0	0	0	1	undefined	58e7a43767f4f81000b4d22e
	false	undefined	0							undefined	0	58e7a52967f4f81000b4d3ee		false	242041	501	107	0	0	0	0	1	undefined	58e7a43767f4f81000b4d22e
	false	undefined	0							undefined	0	58e7a52967f4f81000b4d3ef		true	242527	502	106	0	0	0	0	1	undefined	58e7a43767f4f81000b4d22e
	false	undefined	0							undefined	0	58e7a52a67f4f81000b4d3f0		true	243047	503	111	0	0	0	0	1	undefined	58e7a43767f4f81000b4d22e
	false	undefined	0							undefined	0	58e7a52b67f4f81000b4d3f1		true	243599	504	107	0	0	0	0	1	undefined	58e7a43767f4f81000b4d22e
	false	undefined	0							undefined	0	58e7a52b67f4f81000b4d3f2		false	244193	505	106	0	0	0	0	1	undefined	58e7a43767f4f81000b4d22e
	false	undefined	0							undefined	0	58e7a52c67f4f81000b4d3f3		false	244725	506	110	0	0	0	0	1	undefined	58e7a43767f4f81000b4d22e
	false	undefined	0							undefined	0	58e7a52c67f4f81000b4d3f4		false	245257	507	111	0	0	0	0	1	undefined	58e7a43767f4f81000b4d22e
	false	undefined	0							undefined	0	58e7a52d67f4f81000b4d3f5		true	245724	508	109	0	0	0	0	1	undefined	58e7a43767f4f81000b4d22e
	false	undefined	0							undefined	0	58e7a52d67f4f81000b4d3f6		true	246255	509	112	0	0	0	0	1	undefined	58e7a43767f4f81000b4d22e
	false	undefined	0							undefined	0	58e7a52e67f4f81000b4d3f7		true	246799	510	116	0	0	0	0	1	undefined	58e7a43767f4f81000b4d22e
	false	undefined	0							undefined	0	58e7a52e67f4f81000b4d3f8		false	247316	511	111	0	0	0	0	1	undefined	58e7a43767f4f81000b4d22e
	false	undefined	0							undefined	0	58e7a52f67f4f81000b4d3f9		false	247926	512	107	0	0	0	0	1	undefined	58e7a43767f4f81000b4d22e
	false	undefined	0							undefined	0	58e7a52f67f4f81000b4d3fa		true	248465	513	110	0	0	0	0	1	undefined	58e7a43767f4f81000b4d22e
	false	undefined	0							undefined	0	58e7a53067f4f81000b4d3fb		true	248994	514	121	0	0	0	0	1	undefined	58e7a43767f4f81000b4d22e
	false	undefined	0							undefined	0	58e7a53167f4f81000b4d3fc		false	249531	515	123	0	0	0	0	1	undefined	58e7a43767f4f81000b4d22e
	false	undefined	0							undefined	0	58e7a53167f4f81000b4d3fd		false	250075	516	121	0	0	0	0	1	undefined	58e7a43767f4f81000b4d22e
	false	undefined	0							undefined	0	58e7a53267f4f81000b4d3fe		false	250616	517	121	0	0	0	0	1	undefined	58e7a43767f4f81000b4d22e
	false	undefined	0							undefined	0	58e7a53267f4f81000b4d3ff		true	251199	518	119	0	0	0	0	1	undefined	58e7a43767f4f81000b4d22e
	false	undefined	0							undefined	0	58e7a53367f4f81000b4d400		true	251745	519	114	0	0	0	0	1	undefined	58e7a43767f4f81000b4d22e
	false	undefined	0							undefined	0	58e7a53367f4f81000b4d401		true	252273	520	111	0	0	0	0	1	undefined	58e7a43767f4f81000b4d22e
	false	undefined	0							undefined	0	58e7a53467f4f81000b4d402		true	252808	521	110	0	0	0	0	1	undefined	58e7a43767f4f81000b4d22e
	false	undefined	0							undefined	0	58e7a53467f4f81000b4d403		true	253412	522	108	0	0	0	0	1	undefined	58e7a43767f4f81000b4d22e
	false	undefined	0							undefined	0	58e7a53567f4f81000b4d404		true	253950	523	112	0	0	0	0	1	undefined	58e7a43767f4f81000b4d22e
	false	undefined	0							undefined	0	58e7a53567f4f81000b4d405		true	254486	524	113	0	0	0	0	1	undefined	58e7a43767f4f81000b4d22e
	false	undefined	0							undefined	0	58e7a53667f4f81000b4d406		true	255021	525	115	0	0	0	0	1	undefined	58e7a43767f4f81000b4d22e
	false	undefined	0							undefined	0	58e7a53767f4f81000b4d407		false	255546	526	116	0	0	0	0	1	undefined	58e7a43767f4f81000b4d22e
	false	undefined	0							undefined	0	58e7a53767f4f81000b4d408		true	256077	527	123	0	0	0	0	1	undefined	58e7a43767f4f81000b4d22e
	false	undefined	0							undefined	0	58e7a53867f4f81000b4d409		true	256554	528	123	0	0	0	0	1	undefined	58e7a43767f4f81000b4d22e
	false	undefined	0							undefined	0	58e7a53867f4f81000b4d40a		true	257139	529	117	0	0	0	0	1	undefined	58e7a43767f4f81000b4d22e
	false	undefined	0							undefined	0	58e7a53967f4f81000b4d40b		true	257691	530	108	0	0	0	0	1	undefined	58e7a43767f4f81000b4d22e
	false	undefined	0							undefined	0	58e7a53967f4f81000b4d40c		false	258293	531	101	0	0	0	0	1	undefined	58e7a43767f4f81000b4d22e
	false	undefined	0							undefined	0	58e7a53a67f4f81000b4d40d		false	258887	532	99	0	0	0	0	1	undefined	58e7a43767f4f81000b4d22e
	false	undefined	0							undefined	0	58e7a53a67f4f81000b4d40e		false	259418	533	99	0	0	0	0	1	undefined	58e7a43767f4f81000b4d22e
	false	undefined	0							undefined	0	58e7a53b67f4f81000b4d40f		false	259939	534	104	0	0	0	0	1	undefined	58e7a43767f4f81000b4d22e
	false	undefined	0							undefined	0	58e7a53c67f4f81000b4d410		false	260566	535	114	0	0	0	0	1	undefined	58e7a43767f4f81000b4d22e
	false	undefined	0							undefined	0	58e7a53c67f4f81000b4d411		false	261162	536	121	0	0	0	0	1	undefined	58e7a43767f4f81000b4d22e
	false	undefined	0							undefined	0	58e7a53d67f4f81000b4d412		false	261694	537	123	0	0	0	0	1	undefined	58e7a43767f4f81000b4d22e
	false	undefined	0							undefined	0	58e7a53d67f4f81000b4d413		false	262231	538	119	0	0	0	0	1	undefined	58e7a43767f4f81000b4d22e
	false	undefined	0							undefined	0	58e7a53e67f4f81000b4d414		false	262748	539	115	0	0	0	0	1	undefined	58e7a43767f4f81000b4d22e
	false	undefined	0							undefined	0	58e7a53e67f4f81000b4d415		false	263307	540	115	0	0	0	0	1	undefined	58e7a43767f4f81000b4d22e
	false	undefined	0							undefined	0	58e7a53f67f4f81000b4d416		false	263830	541	118	0	0	0	0	1	undefined	58e7a43767f4f81000b4d22e
	false	undefined	0							undefined	0	58e7a53f67f4f81000b4d417		false	264363	542	116	0	0	0	0	1	undefined	58e7a43767f4f81000b4d22e
	false	undefined	0							undefined	0	58e7a54067f4f81000b4d418		false	264967	543	119	0	0	0	0	1	undefined	58e7a43767f4f81000b4d22e
	false	undefined	0							undefined	0	58e7a54067f4f81000b4d419		false	265522	544	119	0	0	0	0	1	undefined	58e7a43767f4f81000b4d22e
	false	undefined	0							undefined	0	58e7a54167f4f81000b4d41a		false	266115	545	118	0	0	0	0	1	undefined	58e7a43767f4f81000b4d22e
	false	undefined	0							undefined	0	58e7a54267f4f81000b4d41b		false	266641	546	115	0	0	0	0	1	undefined	58e7a43767f4f81000b4d22e
	false	undefined	0							undefined	0	58e7a54267f4f81000b4d41c		false	267160	547	118	0	0	0	0	1	undefined	58e7a43767f4f81000b4d22e
	false	undefined	0							undefined	0	58e7a54367f4f81000b4d41d		false	267703	548	122	0	0	0	0	1	undefined	58e7a43767f4f81000b4d22e
	false	undefined	0							undefined	0	58e7a54367f4f81000b4d41e		false	268180	549	119	0	0	0	0	1	undefined	58e7a43767f4f81000b4d22e
	false	undefined	0							undefined	0	58e7a54467f4f81000b4d41f		false	268786	550	119	0	0	0	0	1	undefined	58e7a43767f4f81000b4d22e
	false	undefined	0							undefined	0	58e7a54467f4f81000b4d420		false	269315	551	120	0	0	0	0	1	undefined	58e7a43767f4f81000b4d22e
	false	undefined	0							undefined	0	58e7a54567f4f81000b4d421		true	269851	552	119	0	0	0	0	1	undefined	58e7a43767f4f81000b4d22e
	false	undefined	0							undefined	0	58e7a54667f4f81000b4d422		true	270394	553	111	0	0	0	0	1	undefined	58e7a43767f4f81000b4d22e
	false	undefined	0							undefined	0	58e7a54667f4f81000b4d423		true	270989	554	109	0	0	0	0	1	undefined	58e7a43767f4f81000b4d22e
	false	undefined	0							undefined	0	58e7a54667f4f81000b4d424		true	271537	555	-1	0	0	0	0	1	undefined	58e7a43767f4f81000b4d22e
	false	undefined	0							undefined	0	58e7a54767f4f81000b4d425		true	272032	556	-1	0	0	0	0	1	undefined	58e7a43767f4f81000b4d22e
	false	undefined	0							undefined	0	58e7a54867f4f81000b4d426		true	272577	557	-1	0	0	0	0	1	undefined	58e7a43767f4f81000b4d22e
	false	undefined	0							undefined	0	58e7a54867f4f81000b4d427		true	273055	561	135	0	0	0	0	1	undefined	58e7a43767f4f81000b4d22e
	false	undefined	0							undefined	0	58e7a54967f4f81000b4d428		true	273574	562	-1	0	0	0	0	1	undefined	58e7a43767f4f81000b4d22e
	false	undefined	0							undefined	0	58e7a54967f4f81000b4d429		true	274118	563	-1	0	0	0	0	1	undefined	58e7a43767f4f81000b4d22e
	false	undefined	0							undefined	0	58e7a54a67f4f81000b4d42a		true	274718	564	-1	0	0	0	0	1	undefined	58e7a43767f4f81000b4d22e
	false	undefined	0							undefined	0	58e7a54a67f4f81000b4d42b		true	275245	565	-1	0	0	0	0	1	undefined	58e7a43767f4f81000b4d22e
	false	undefined	0							undefined	0	58e7a54b67f4f81000b4d42c		true	275794	566	-1	0	0	0	0	1	undefined	58e7a43767f4f81000b4d22e
	false	undefined	0							undefined	0	58e7a54b67f4f81000b4d42d		true	276315	567	-1	0	0	0	0	1	undefined	58e7a43767f4f81000b4d22e
	false	undefined	0							undefined	0	58e7a54c67f4f81000b4d42e		false	276866	568	-1	0	0	0	0	1	undefined	58e7a43767f4f81000b4d22e
	false	undefined	0							undefined	0	58e7a54c67f4f81000b4d42f		false	277400	569	-1	0	0	0	0	1	undefined	58e7a43767f4f81000b4d22e
	false	undefined	0							undefined	0	58e7a54d67f4f81000b4d430		false	277912	570	-1	0	0	0	0	1	undefined	58e7a43767f4f81000b4d22e
	false	undefined	0							undefined	0	58e7a54e67f4f81000b4d431		true	278455	574	-1	0	0	0	0	1	undefined	58e7a43767f4f81000b4d22e
	false	undefined	0							undefined	0	58e7a54e67f4f81000b4d432		true	279327	575	-1	0	0	0	0	1	undefined	58e7a43767f4f81000b4d22e
	false	undefined	0							undefined	0	58e7a54f67f4f81000b4d433		true	280066	577	-1	0	0	0	0	1	undefined	58e7a43767f4f81000b4d22e
	false	undefined	0							undefined	0	58e7a55067f4f81000b4d434		true	280585	578	110	0	0	0	0	1	undefined	58e7a43767f4f81000b4d22e
	false	undefined	0							undefined	0	58e7a55067f4f81000b4d435		true	281177	579	-1	0	0	0	0	1	undefined	58e7a43767f4f81000b4d22e
	false	undefined	0							undefined	0	58e7a55167f4f81000b4d436		true	281675	580	-1	0	0	0	0	1	undefined	58e7a43767f4f81000b4d22e
	false	undefined	0							undefined	0	58e7a55167f4f81000b4d437		false	282297	581	-1	0	0	0	0	1	undefined	58e7a43767f4f81000b4d22e
	false	undefined	0							undefined	0	58e7a55267f4f81000b4d438		false	282804	582	-1	0	0	0	0	1	undefined	58e7a43767f4f81000b4d22e
	false	undefined	0							undefined	0	58e7a55267f4f81000b4d439		false	283412	583	-1	0	0	0	0	1	undefined	58e7a43767f4f81000b4d22e
	false	undefined	0							undefined	0	58e7a55367f4f81000b4d43a		false	283936	584	-1	0	0	0	0	1	undefined	58e7a43767f4f81000b4d22e
	false	undefined	0							undefined	0	58e7a55367f4f81000b4d43b		false	284529	585	-1	0	0	0	0	1	undefined	58e7a43767f4f81000b4d22e
	false	undefined	0							undefined	0	58e7a55467f4f81000b4d43c		false	284993	586	-1	0	0	0	0	1	undefined	58e7a43767f4f81000b4d22e
	false	undefined	0							undefined	0	58e7a55467f4f81000b4d43d		false	285547	587	-1	0	0	0	0	1	undefined	58e7a43767f4f81000b4d22e
	false	undefined	0							undefined	0	58e7a55567f4f81000b4d43e		false	286068	588	-1	0	0	0	0	1	undefined	58e7a43767f4f81000b4d22e
	false	undefined	0							undefined	0	58e7a55667f4f81000b4d43f		true	286609	589	-1	0	0	0	0	1	undefined	58e7a43767f4f81000b4d22e
	false	undefined	0							undefined	0	58e7a55667f4f81000b4d440		true	287143	590	74	0	0	0	0	1	undefined	58e7a43767f4f81000b4d22e
	false	undefined	0							undefined	0	58e7a55767f4f81000b4d441		true	287660	591	-1	0	0	0	0	1	undefined	58e7a43767f4f81000b4d22e
	false	undefined	0							undefined	0	58e7a55767f4f81000b4d442		true	288202	595	62	0	0	0	0	1	undefined	58e7a43767f4f81000b4d22e
	false	undefined	0							undefined	0	58e7a55867f4f81000b4d443		true	288755	596	-1	0	0	0	0	1	undefined	58e7a43767f4f81000b4d22e
	false	undefined	0							undefined	0	58e7a55867f4f81000b4d444		true	289280	597	-1	0	0	0	0	1	undefined	58e7a43767f4f81000b4d22e
	false	undefined	0							undefined	0	58e7a55967f4f81000b4d445		true	289813	598	-1	0	0	0	0	1	undefined	58e7a43767f4f81000b4d22e
	false	undefined	0							undefined	0	58e7a55967f4f81000b4d446		false	290347	599	-1	0	0	0	0	1	undefined	58e7a43767f4f81000b4d22e
	false	undefined	0							undefined	0	58e7a55a67f4f81000b4d447		true	290908	600	72	0	0	0	0	1	undefined	58e7a43767f4f81000b4d22e
	false	undefined	0							undefined	0	58e7a55b67f4f81000b4d448		true	291429	601	-1	0	0	0	0	1	undefined	58e7a43767f4f81000b4d22e
	false	undefined	0							undefined	0	58e7a55b67f4f81000b4d449		true	292028	602	-1	0	0	0	0	1	undefined	58e7a43767f4f81000b4d22e
	false	undefined	0							undefined	0	58e7a55c67f4f81000b4d44a		false	292540	603	-1	0	0	0	0	1	undefined	58e7a43767f4f81000b4d22e
	false	undefined	0							undefined	0	58e7a55c67f4f81000b4d44b		false	293149	604	-1	0	0	0	0	1	undefined	58e7a43767f4f81000b4d22e
	false	undefined	0							undefined	0	58e7a55d67f4f81000b4d44c		false	293691	605	-1	0	0	0	0	1	undefined	58e7a43767f4f81000b4d22e
	false	undefined	0							undefined	0	58e7a55d67f4f81000b4d44d		false	294302	606	-1	0	0	0	0	1	undefined	58e7a43767f4f81000b4d22e
	false	undefined	0							undefined	0	58e7a55e67f4f81000b4d44e		false	294831	607	-1	0	0	0	0	1	undefined	58e7a43767f4f81000b4d22e
	false	undefined	0							undefined	0	58e7a55e67f4f81000b4d44f		false	295432	608	-1	0	0	0	0	1	undefined	58e7a43767f4f81000b4d22e
	false	undefined	0							undefined	0	58e7a55f67f4f81000b4d450		false	295959	609	-1	0	0	0	0	1	undefined	58e7a43767f4f81000b4d22e
	false	undefined	0							undefined	0	58e7a55f67f4f81000b4d451		false	296489	610	-1	0	0	0	0	1	undefined	58e7a43767f4f81000b4d22e
	false	undefined	0							undefined	0	58e7a56067f4f81000b4d452		false	297015	611	-1	0	0	0	0	1	undefined	58e7a43767f4f81000b4d22e
	false	undefined	0							undefined	0	58e7a56167f4f81000b4d453		false	297572	612	-1	0	0	0	0	1	undefined	58e7a43767f4f81000b4d22e
	false	undefined	0							undefined	0	58e7a56167f4f81000b4d454		false	298105	613	-1	0	0	0	0	1	undefined	58e7a43767f4f81000b4d22e
	false	undefined	0							undefined	0	58e7a56267f4f81000b4d455		false	298630	617	-1	0	0	0	0	1	undefined	58e7a43767f4f81000b4d22e
	false	undefined	0							undefined	0	58e7a56267f4f81000b4d456		false	299095	618	-1	0	0	0	0	1	undefined	58e7a43767f4f81000b4d22e
	false	undefined	0							undefined	0	58e7a56367f4f81000b4d457		false	299638	619	116	0	0	0	0	1	undefined	58e7a43767f4f81000b4d22e
	false	undefined	0							undefined	0	58e7a56367f4f81000b4d458		false	300174	620	116	0	0	0	0	1	undefined	58e7a43767f4f81000b4d22e
	false	undefined	0							undefined	0	58e7a56467f4f81000b4d459		false	300708	621	111	0	0	0	0	1	undefined	58e7a43767f4f81000b4d22e
	false	undefined	0							undefined	0	58e7a56467f4f81000b4d45a		false	301238	622	110	0	0	0	0	1	undefined	58e7a43767f4f81000b4d22e
	false	undefined	0							undefined	0	58e7a56567f4f81000b4d45b		false	301720	623	113	0	0	0	0	1	undefined	58e7a43767f4f81000b4d22e
	false	undefined	0							undefined	0	58e7a56567f4f81000b4d45c		false	302290	624	120	0	0	0	0	1	undefined	58e7a43767f4f81000b4d22e
	false	undefined	0							undefined	0	58e7a56667f4f81000b4d45d		false	302825	625	122	0	0	0	0	1	undefined	58e7a43767f4f81000b4d22e
	false	undefined	0							undefined	0	58e7a56667f4f81000b4d45e		false	303310	626	119	0	0	0	0	1	undefined	58e7a43767f4f81000b4d22e
	false	undefined	0							undefined	0	58e7a56767f4f81000b4d45f		false	303848	627	111	0	0	0	0	1	undefined	58e7a43767f4f81000b4d22e
	false	undefined	0							undefined	0	58e7a56767f4f81000b4d460		false	304379	628	109	0	0	0	0	1	undefined	58e7a43767f4f81000b4d22e
	false	undefined	0							undefined	0	58e7a56867f4f81000b4d461		false	304898	629	109	0	0	0	0	1	undefined	58e7a43767f4f81000b4d22e
	false	undefined	0							undefined	0	58e7a56867f4f81000b4d462		false	305440	630	108	0	0	0	0	1	undefined	58e7a43767f4f81000b4d22e
	false	undefined	0							undefined	0	58e7a56967f4f81000b4d463		false	305972	631	108	0	0	0	0	1	undefined	58e7a43767f4f81000b4d22e
	false	undefined	0							undefined	0	58e7a56967f4f81000b4d464		false	306520	632	110	0	0	0	0	1	undefined	58e7a43767f4f81000b4d22e
	false	undefined	0							undefined	0	58e7a56a67f4f81000b4d465		false	307052	633	111	0	0	0	0	1	undefined	58e7a43767f4f81000b4d22e
	false	undefined	0							undefined	0	58e7a56b67f4f81000b4d466		false	307661	634	106	0	0	0	0	1	undefined	58e7a43767f4f81000b4d22e
	false	undefined	0							undefined	0	58e7a56b67f4f81000b4d467		false	308172	635	104	0	0	0	0	1	undefined	58e7a43767f4f81000b4d22e
	false	undefined	0							undefined	0	58e7a56c67f4f81000b4d468		false	308835	636	104	0	0	0	0	1	undefined	58e7a43767f4f81000b4d22e
	false	undefined	0							undefined	0	58e7a56c67f4f81000b4d469		false	309392	637	106	0	0	0	0	1	undefined	58e7a43767f4f81000b4d22e
	false	undefined	0							undefined	0	58e7a56d67f4f81000b4d46a		false	309917	638	111	0	0	0	0	1	undefined	58e7a43767f4f81000b4d22e
	false	undefined	0							undefined	0	58e7a56d67f4f81000b4d46b		false	310458	639	113	0	0	0	0	1	undefined	58e7a43767f4f81000b4d22e
	false	undefined	0							undefined	0	58e7a56e67f4f81000b4d46c		false	311058	640	116	0	0	0	0	1	undefined	58e7a43767f4f81000b4d22e
	false	undefined	0							undefined	0	58e7a56f67f4f81000b4d46d		false	311578	641	116	0	0	0	0	1	undefined	58e7a43767f4f81000b4d22e
	false	undefined	0							undefined	0	58e7a56f67f4f81000b4d46e		false	312113	642	117	0	0	0	0	1	undefined	58e7a43767f4f81000b4d22e
	false	undefined	0							undefined	0	58e7a57067f4f81000b4d46f		false	312672	643	115	0	0	0	0	1	undefined	58e7a43767f4f81000b4d22e
	false	undefined	0							undefined	0	58e7a57067f4f81000b4d470		false	313189	644	114	0	0	0	0	1	undefined	58e7a43767f4f81000b4d22e
	false	undefined	0							undefined	0	58e7a57167f4f81000b4d471		false	313726	645	119	0	0	0	0	1	undefined	58e7a43767f4f81000b4d22e
	false	undefined	0							undefined	0	58e7a57167f4f81000b4d472		false	314330	646	117	0	0	0	0	1	undefined	58e7a43767f4f81000b4d22e
	false	undefined	0							undefined	0	58e7a57267f4f81000b4d473		false	314790	647	118	0	0	0	0	1	undefined	58e7a43767f4f81000b4d22e
	false	undefined	0							undefined	0	58e7a57267f4f81000b4d474		false	315327	648	116	0	0	0	0	1	undefined	58e7a43767f4f81000b4d22e
	false	undefined	0							undefined	0	58e7a57367f4f81000b4d475		false	315876	649	110	0	0	0	0	1	undefined	58e7a43767f4f81000b4d22e
	false	undefined	0							undefined	0	58e7a57367f4f81000b4d476		false	316461	650	109	0	0	0	0	1	undefined	58e7a43767f4f81000b4d22e
	false	undefined	0							undefined	0	58e7a57467f4f81000b4d477		true	316983	651	113	0	0	0	0	1	undefined	58e7a43767f4f81000b4d22e
	false	undefined	0							undefined	0	58e7a57467f4f81000b4d478		false	317542	652	118	0	0	0	0	1	undefined	58e7a43767f4f81000b4d22e
	false	undefined	0							undefined	0	58e7a57567f4f81000b4d479		false	318062	653	117	0	0	0	0	1	undefined	58e7a43767f4f81000b4d22e
	false	undefined	0							undefined	0	58e7a57667f4f81000b4d47a		false	318597	654	119	0	0	0	0	1	undefined	58e7a43767f4f81000b4d22e
	false	undefined	0							undefined	0	58e7a57667f4f81000b4d47b		true	319131	655	127	0	0	0	0	1	undefined	58e7a43767f4f81000b4d22e
	false	undefined	0							undefined	0	58e7a57767f4f81000b4d47c		true	319679	656	128	0	0	0	0	1	undefined	58e7a43767f4f81000b4d22e
	false	undefined	0							undefined	0	58e7a57767f4f81000b4d47d		true	320278	657	122	0	0	0	0	1	undefined	58e7a43767f4f81000b4d22e
	false	undefined	0							undefined	0	58e7a57867f4f81000b4d47e		true	320812	658	124	0	0	0	0	1	undefined	58e7a43767f4f81000b4d22e
	false	undefined	0							undefined	0	58e7a57867f4f81000b4d47f		false	321345	659	127	0	0	0	0	1	undefined	58e7a43767f4f81000b4d22e
	false	undefined	0							undefined	0	58e7a57967f4f81000b4d480		false	321874	660	125	0	0	0	0	1	undefined	58e7a43767f4f81000b4d22e
	false	undefined	0							undefined	0	58e7a57967f4f81000b4d481		false	322361	661	123	0	0	0	0	1	undefined	58e7a43767f4f81000b4d22e
	false	undefined	0							undefined	0	58e7a57a67f4f81000b4d482		false	322877	662	116	0	0	0	0	1	undefined	58e7a43767f4f81000b4d22e
	false	undefined	0							undefined	0	58e7a57a67f4f81000b4d483		true	323417	663	110	0	0	0	0	1	undefined	58e7a43767f4f81000b4d22e
	false	undefined	0							undefined	0	58e7a57b67f4f81000b4d484		false	323939	664	109	0	0	0	0	1	undefined	58e7a43767f4f81000b4d22e
	false	undefined	0							undefined	0	58e7a57b67f4f81000b4d485		false	324474	665	116	0	0	0	0	1	undefined	58e7a43767f4f81000b4d22e
	false	undefined	0							undefined	0	58e7a57c67f4f81000b4d486		false	325002	666	124	0	0	0	0	1	undefined	58e7a43767f4f81000b4d22e
	false	undefined	0							undefined	0	58e7a57d67f4f81000b4d487		false	325827	667	130	0	0	0	0	1	undefined	58e7a43767f4f81000b4d22e
	false	undefined	0							undefined	0	58e7a57d67f4f81000b4d488		false	326168	668	134	0	0	0	0	1	undefined	58e7a43767f4f81000b4d22e
	false	undefined	0							undefined	0	58e7a57e67f4f81000b4d489		false	326553	669	128	0	0	0	0	1	undefined	58e7a43767f4f81000b4d22e
	false	undefined	0							undefined	0	58e7a57e67f4f81000b4d48a		false	327074	670	123	0	0	0	0	1	undefined	58e7a43767f4f81000b4d22e
	false	undefined	0							undefined	0	58e7a57f67f4f81000b4d48b		true	327620	671	121	0	0	0	0	1	undefined	58e7a43767f4f81000b4d22e
	false	undefined	0							undefined	0	58e7a57f67f4f81000b4d48c		true	328145	672	112	0	0	0	0	1	undefined	58e7a43767f4f81000b4d22e
	false	undefined	0							undefined	0	58e7a58067f4f81000b4d48d		true	328625	673	102	0	0	0	0	1	undefined	58e7a43767f4f81000b4d22e
	false	undefined	0							undefined	0	58e7a58067f4f81000b4d48e		true	329221	674	-1	0	0	0	0	1	undefined	58e7a43767f4f81000b4d22e
	false	undefined	0							undefined	0	58e7a58167f4f81000b4d48f		true	329760	675	-1	0	0	0	0	1	undefined	58e7a43767f4f81000b4d22e
	false	undefined	0							undefined	0	58e7a58167f4f81000b4d490		true	330279	676	-1	0	0	0	0	1	undefined	58e7a43767f4f81000b4d22e
	false	undefined	0							undefined	0	58e7a58267f4f81000b4d491		false	330827	680	128	0	0	0	0	1	undefined	58e7a43767f4f81000b4d22e
	false	undefined	0							undefined	0	58e7a58267f4f81000b4d492		false	331289	681	125	0	0	0	0	1	undefined	58e7a43767f4f81000b4d22e
	false	undefined	0							undefined	0	58e7a58367f4f81000b4d493		false	331896	682	128	0	0	0	0	1	undefined	58e7a43767f4f81000b4d22e
	false	undefined	0							undefined	0	58e7a58367f4f81000b4d494		false	332369	683	125	0	0	0	0	1	undefined	58e7a43767f4f81000b4d22e
	false	undefined	0							undefined	0	58e7a58467f4f81000b4d495		false	332909	684	126	0	0	0	0	1	undefined	58e7a43767f4f81000b4d22e
	false	undefined	0							undefined	0	58e7a58467f4f81000b4d496		false	333436	685	128	0	0	0	0	1	undefined	58e7a43767f4f81000b4d22e
	false	undefined	0							undefined	0	58e7a58567f4f81000b4d497		false	333972	686	127	0	0	0	0	1	undefined	58e7a43767f4f81000b4d22e
	false	undefined	0							undefined	0	58e7a58567f4f81000b4d498		false	334515	687	128	0	0	0	0	1	undefined	58e7a43767f4f81000b4d22e
	false	undefined	0							undefined	0	58e7a58667f4f81000b4d499		false	335096	688	127	0	0	0	0	1	undefined	58e7a43767f4f81000b4d22e
	false	undefined	0							undefined	0	58e7a58767f4f81000b4d49a		false	335645	689	126	0	0	0	0	1	undefined	58e7a43767f4f81000b4d22e
	false	undefined	0							undefined	0	58e7a58767f4f81000b4d49b		false	336108	690	121	0	0	0	0	1	undefined	58e7a43767f4f81000b4d22e
	false	undefined	0							undefined	0	58e7a58867f4f81000b4d49c		false	336711	691	121	0	0	0	0	1	undefined	58e7a43767f4f81000b4d22e
	false	undefined	0							undefined	0	58e7a58867f4f81000b4d49d		false	337239	692	124	0	0	0	0	1	undefined	58e7a43767f4f81000b4d22e
	false	undefined	0							undefined	0	58e7a58967f4f81000b4d49e		false	337785	693	120	0	0	0	0	1	undefined	58e7a43767f4f81000b4d22e
	false	undefined	0							undefined	0	58e7a58967f4f81000b4d49f		false	338297	694	113	0	0	0	0	1	undefined	58e7a43767f4f81000b4d22e
	false	undefined	0							undefined	0	58e7a58a67f4f81000b4d4a0		false	338767	695	112	0	0	0	0	1	undefined	58e7a43767f4f81000b4d22e
	false	undefined	0							undefined	0	58e7a58a67f4f81000b4d4a1		false	339384	696	117	0	0	0	0	1	undefined	58e7a43767f4f81000b4d22e
	false	undefined	0							undefined	0	58e7a58b67f4f81000b4d4a2		false	339928	697	112	0	0	0	0	1	undefined	58e7a43767f4f81000b4d22e
	false	undefined	0							undefined	0	58e7a58b67f4f81000b4d4a3		false	340532	698	108	0	0	0	0	1	undefined	58e7a43767f4f81000b4d22e
	false	undefined	0							undefined	0	58e7a58c67f4f81000b4d4a4		false	341055	699	108	0	0	0	0	1	undefined	58e7a43767f4f81000b4d22e
	false	undefined	0							undefined	0	58e7a58d67f4f81000b4d4a5		false	341588	700	112	0	0	0	0	1	undefined	58e7a43767f4f81000b4d22e
	false	undefined	0							undefined	0	58e7a58d67f4f81000b4d4a6		false	342135	701	115	0	0	0	0	1	undefined	58e7a43767f4f81000b4d22e
	false	undefined	0							undefined	0	58e7a58e67f4f81000b4d4a7		false	342583	702	113	0	0	0	0	1	undefined	58e7a43767f4f81000b4d22e
	false	undefined	0							undefined	0	58e7a58e67f4f81000b4d4a8		false	343123	703	113	0	0	0	0	1	undefined	58e7a43767f4f81000b4d22e
	false	undefined	0							undefined	0	58e7a58f67f4f81000b4d4a9		false	343736	704	111	0	0	0	0	1	undefined	58e7a43767f4f81000b4d22e
	false	undefined	0							undefined	0	58e7a58f67f4f81000b4d4aa		false	344271	705	111	0	0	0	0	1	undefined	58e7a43767f4f81000b4d22e
	false	undefined	0							undefined	0	58e7a59067f4f81000b4d4ab		false	344787	706	110	0	0	0	0	1	undefined	58e7a43767f4f81000b4d22e
	false	undefined	0							undefined	0	58e7a59067f4f81000b4d4ac		true	345332	707	113	0	0	0	0	1	undefined	58e7a43767f4f81000b4d22e
	false	undefined	0							undefined	0	58e7a59167f4f81000b4d4ad		true	345777	708	119	0	0	0	0	1	undefined	58e7a43767f4f81000b4d22e
	false	undefined	0							undefined	0	58e7a59167f4f81000b4d4ae		false	346394	709	125	0	0	0	0	1	undefined	58e7a43767f4f81000b4d22e
	false	undefined	0							undefined	0	58e7a59267f4f81000b4d4af		false	346850	710	129	0	0	0	0	1	undefined	58e7a43767f4f81000b4d22e
	false	undefined	0							undefined	0	58e7a59267f4f81000b4d4b0		true	347471	711	129	0	0	0	0	1	undefined	58e7a43767f4f81000b4d22e
	false	undefined	0							undefined	0	58e7a59367f4f81000b4d4b1		false	347999	712	121	0	0	0	0	1	undefined	58e7a43767f4f81000b4d22e
	false	undefined	0							undefined	0	58e7a59467f4f81000b4d4b2		false	348552	713	119	0	0	0	0	1	undefined	58e7a43767f4f81000b4d22e
	false	undefined	0							undefined	0	58e7a59467f4f81000b4d4b3		false	349066	714	119	0	0	0	0	1	undefined	58e7a43767f4f81000b4d22e
	false	undefined	0							undefined	0	58e7a59567f4f81000b4d4b4		false	349596	715	114	0	0	0	0	1	undefined	58e7a43767f4f81000b4d22e
	false	undefined	0							undefined	0	58e7a59567f4f81000b4d4b5		false	350120	716	114	0	0	0	0	1	undefined	58e7a43767f4f81000b4d22e
	false	undefined	0							undefined	0	58e7a59667f4f81000b4d4b6		false	350679	717	110	0	0	0	0	1	undefined	58e7a43767f4f81000b4d22e
	false	undefined	0							undefined	0	58e7a59667f4f81000b4d4b7		true	351209	718	116	0	0	0	0	1	undefined	58e7a43767f4f81000b4d22e
	false	undefined	0							undefined	0	58e7a59767f4f81000b4d4b8		true	351743	719	119	0	0	0	0	1	undefined	58e7a43767f4f81000b4d22e
	false	undefined	0							undefined	0	58e7a59767f4f81000b4d4b9		true	352269	720	115	0	0	0	0	1	undefined	58e7a43767f4f81000b4d22e
	false	undefined	0							undefined	0	58e7a59867f4f81000b4d4ba		true	352805	721	116	0	0	0	0	1	undefined	58e7a43767f4f81000b4d22e
	false	undefined	0							undefined	0	58e7a59867f4f81000b4d4bb		false	353348	722	122	0	0	0	0	1	undefined	58e7a43767f4f81000b4d22e
	false	undefined	0							undefined	0	58e7a59967f4f81000b4d4bc		false	353881	723	125	0	0	0	0	1	undefined	58e7a43767f4f81000b4d22e
	false	undefined	0							undefined	0	58e7a59967f4f81000b4d4bd		false	354418	724	126	0	0	0	0	1	undefined	58e7a43767f4f81000b4d22e
	false	undefined	0							undefined	0	58e7a59a67f4f81000b4d4be		false	354950	725	124	0	0	0	0	1	undefined	58e7a43767f4f81000b4d22e
	false	undefined	0							undefined	0	58e7a59a67f4f81000b4d4bf		false	355427	726	114	0	0	0	0	1	undefined	58e7a43767f4f81000b4d22e
	false	undefined	0							undefined	0	58e7a59b67f4f81000b4d4c0		false	356012	727	107	0	0	0	0	1	undefined	58e7a43767f4f81000b4d22e
	false	undefined	0							undefined	0	58e7a59b67f4f81000b4d4c1		false	356537	728	113	0	0	0	0	1	undefined	58e7a43767f4f81000b4d22e
	false	undefined	0							undefined	0	58e7a59c67f4f81000b4d4c2		false	357091	729	124	0	0	0	0	1	undefined	58e7a43767f4f81000b4d22e
	false	undefined	0							undefined	0	58e7a59d67f4f81000b4d4c3		false	357607	730	121	0	0	0	0	1	undefined	58e7a43767f4f81000b4d22e
	false	undefined	0							undefined	0	58e7a59d67f4f81000b4d4c4		false	358138	731	118	0	0	0	0	1	undefined	58e7a43767f4f81000b4d22e
	false	undefined	0							undefined	0	58e7a59e67f4f81000b4d4c5		false	358686	732	123	0	0	0	0	1	undefined	58e7a43767f4f81000b4d22e
	false	undefined	0							undefined	0	58e7a59e67f4f81000b4d4c6		false	359225	733	124	0	0	0	0	1	undefined	58e7a43767f4f81000b4d22e
	false	undefined	0							undefined	0	58e7a59f67f4f81000b4d4c7		false	359754	734	118	0	0	0	0	1	undefined	58e7a43767f4f81000b4d22e
	false	undefined	0							undefined	0	58e7a59f67f4f81000b4d4c8		false	360298	735	115	0	0	0	0	1	undefined	58e7a43767f4f81000b4d22e
	false	undefined	0							undefined	0	58e7a5a067f4f81000b4d4c9		true	360824	736	121	0	0	0	0	1	undefined	58e7a43767f4f81000b4d22e
	false	undefined	0							undefined	0	58e7a5a067f4f81000b4d4ca		true	361360	737	119	0	0	0	0	1	undefined	58e7a43767f4f81000b4d22e
	false	undefined	0							undefined	0	58e7a5a167f4f81000b4d4cb		false	361895	738	115	0	0	0	0	1	undefined	58e7a43767f4f81000b4d22e
	false	undefined	0							undefined	0	58e7a5a167f4f81000b4d4cc		false	362375	739	114	0	0	0	0	1	undefined	58e7a43767f4f81000b4d22e
	false	undefined	0							undefined	0	58e7a5a267f4f81000b4d4cd		false	362878	740	114	0	0	0	0	1	undefined	58e7a43767f4f81000b4d22e
	false	undefined	0							undefined	0	58e7a5a367f4f81000b4d4ce		false	363427	741	114	0	0	0	0	1	undefined	58e7a43767f4f81000b4d22e
	false	undefined	0							undefined	0	58e7a5a367f4f81000b4d4cf		true	363979	742	105	0	0	0	0	1	undefined	58e7a43767f4f81000b4d22e
	false	undefined	0							undefined	0	58e7a5a467f4f81000b4d4d0		true	364594	743	100	0	0	0	0	1	undefined	58e7a43767f4f81000b4d22e
	false	undefined	0							undefined	0	58e7a5a467f4f81000b4d4d1		true	365240	744	109	0	0	0	0	1	undefined	58e7a43767f4f81000b4d22e
	false	undefined	0							undefined	0	58e7a5a567f4f81000b4d4d2		true	365750	745	121	0	0	0	0	1	undefined	58e7a43767f4f81000b4d22e
	false	undefined	0							undefined	0	58e7a5a567f4f81000b4d4d3		false	366187	746	125	0	0	0	0	1	undefined	58e7a43767f4f81000b4d22e
	false	undefined	0							undefined	0	58e7a5a667f4f81000b4d4d4		false	366751	747	125	0	0	0	0	1	undefined	58e7a43767f4f81000b4d22e
	false	undefined	0							undefined	0	58e7a5a667f4f81000b4d4d5		true	367308	748	124	0	0	0	0	1	undefined	58e7a43767f4f81000b4d22e
	false	undefined	0							undefined	0	58e7a5a767f4f81000b4d4d6		true	367838	749	122	0	0	0	0	1	undefined	58e7a43767f4f81000b4d22e
	false	undefined	0							undefined	0	58e7a5a767f4f81000b4d4d7		false	368370	750	123	0	0	0	0	1	undefined	58e7a43767f4f81000b4d22e
	false	undefined	0							undefined	0	58e7a5a867f4f81000b4d4d8		false	368904	751	124	0	0	0	0	1	undefined	58e7a43767f4f81000b4d22e
	false	undefined	0							undefined	0	58e7a5a867f4f81000b4d4d9		false	369438	752	126	0	0	0	0	1	undefined	58e7a43767f4f81000b4d22e
	false	undefined	0							undefined	0	58e7a5a967f4f81000b4d4da		false	369975	753	127	0	0	0	0	1	undefined	58e7a43767f4f81000b4d22e
	false	undefined	0							undefined	0	58e7a5a967f4f81000b4d4db		false	370505	754	127	0	0	0	0	1	undefined	58e7a43767f4f81000b4d22e
	false	undefined	0							undefined	0	58e7a5aa67f4f81000b4d4dc		false	371051	755	128	0	0	0	0	1	undefined	58e7a43767f4f81000b4d22e
	false	undefined	0							undefined	0	58e7a5ab67f4f81000b4d4dd		false	371584	756	128	0	0	0	0	1	undefined	58e7a43767f4f81000b4d22e
	false	undefined	0							undefined	0	58e7a5ab67f4f81000b4d4de		false	372105	757	124	0	0	0	0	1	undefined	58e7a43767f4f81000b4d22e
	false	undefined	0							undefined	0	58e7a5ac67f4f81000b4d4df		false	372636	758	121	0	0	0	0	1	undefined	58e7a43767f4f81000b4d22e
	false	undefined	0							undefined	0	58e7a5ac67f4f81000b4d4e0		true	373160	759	117	0	0	0	0	1	undefined	58e7a43767f4f81000b4d22e
	false	undefined	0							undefined	0	58e7a5ad67f4f81000b4d4e1		true	373720	760	115	0	0	0	0	1	undefined	58e7a43767f4f81000b4d22e
	false	undefined	0							undefined	0	58e7a5ad67f4f81000b4d4e2		true	374255	761	113	0	0	0	0	1	undefined	58e7a43767f4f81000b4d22e
	false	undefined	0							undefined	0	58e7a5ae67f4f81000b4d4e3		true	374768	762	113	0	0	0	0	1	undefined	58e7a43767f4f81000b4d22e
	false	undefined	0							undefined	0	58e7a5af67f4f81000b4d4e4		true	375325	763	113	0	0	0	0	1	undefined	58e7a43767f4f81000b4d22e
	false	undefined	0							undefined	0	58e7a5af67f4f81000b4d4e5		true	375931	764	117	0	0	0	0	1	undefined	58e7a43767f4f81000b4d22e
	false	undefined	0							undefined	0	58e7a5af67f4f81000b4d4e6		false	376465	765	120	0	0	0	0	1	undefined	58e7a43767f4f81000b4d22e
	false	undefined	0							undefined	0	58e7a5b067f4f81000b4d4e7		false	377066	766	123	0	0	0	0	1	undefined	58e7a43767f4f81000b4d22e
	false	undefined	0							undefined	0	58e7a5b167f4f81000b4d4e8		false	377596	767	123	0	0	0	0	1	undefined	58e7a43767f4f81000b4d22e
	false	undefined	0							undefined	0	58e7a5b167f4f81000b4d4e9		true	378127	768	119	0	0	0	0	1	undefined	58e7a43767f4f81000b4d22e
	false	undefined	0							undefined	0	58e7a5b267f4f81000b4d4ea		false	378657	769	118	0	0	0	0	1	undefined	58e7a43767f4f81000b4d22e
	false	undefined	0							undefined	0	58e7a5b267f4f81000b4d4eb		false	379201	770	117	0	0	0	0	1	undefined	58e7a43767f4f81000b4d22e
	false	undefined	0							undefined	0	58e7a5b367f4f81000b4d4ec		true	379746	771	122	0	0	0	0	1	undefined	58e7a43767f4f81000b4d22e
	false	undefined	0							undefined	0	58e7a5b367f4f81000b4d4ed		true	380253	772	120	0	0	0	0	1	undefined	58e7a43767f4f81000b4d22e
	false	undefined	0							undefined	0	58e7a5b467f4f81000b4d4ee		false	380786	773	120	0	0	0	0	1	undefined	58e7a43767f4f81000b4d22e
	false	undefined	0							undefined	0	58e7a5b467f4f81000b4d4ef		false	381332	774	122	0	0	0	0	1	undefined	58e7a43767f4f81000b4d22e
	false	undefined	0							undefined	0	58e7a5b567f4f81000b4d4f0		false	381866	775	123	0	0	0	0	1	undefined	58e7a43767f4f81000b4d22e
	false	undefined	0							undefined	0	58e7a5b567f4f81000b4d4f1		false	382395	776	126	0	0	0	0	1	undefined	58e7a43767f4f81000b4d22e
	false	undefined	0							undefined	0	58e7a5b667f4f81000b4d4f2		false	382933	777	123	0	0	0	0	1	undefined	58e7a43767f4f81000b4d22e
	false	undefined	0							undefined	0	58e7a5b667f4f81000b4d4f3		false	383470	778	119	0	0	0	0	1	undefined	58e7a43767f4f81000b4d22e
	false	undefined	0							undefined	0	58e7a5b767f4f81000b4d4f4		false	384008	779	117	0	0	0	0	1	undefined	58e7a43767f4f81000b4d22e
	false	undefined	0							undefined	0	58e7a5b867f4f81000b4d4f5		false	384543	780	117	0	0	0	0	1	undefined	58e7a43767f4f81000b4d22e
	false	undefined	0							undefined	0	58e7a5b867f4f81000b4d4f6		false	385062	781	117	0	0	0	0	1	undefined	58e7a43767f4f81000b4d22e
	false	undefined	0							undefined	0	58e7a5b967f4f81000b4d4f7		false	385533	782	112	0	0	0	0	1	undefined	58e7a43767f4f81000b4d22e
	false	undefined	0							undefined	0	58e7a5b967f4f81000b4d4f8		false	386178	783	110	0	0	0	0	1	undefined	58e7a43767f4f81000b4d22e
	false	undefined	0							undefined	0	58e7a5ba67f4f81000b4d4f9		false	386678	784	110	0	0	0	0	1	undefined	58e7a43767f4f81000b4d22e
	false	undefined	0							undefined	0	58e7a5ba67f4f81000b4d4fa		true	387217	785	117	0	0	0	0	1	undefined	58e7a43767f4f81000b4d22e
	false	undefined	0							undefined	0	58e7a5bb67f4f81000b4d4fb		true	387747	786	123	0	0	0	0	1	undefined	58e7a43767f4f81000b4d22e
	false	undefined	0							undefined	0	58e7a5bc67f4f81000b4d4fc		false	388353	787	127	0	0	0	0	1	undefined	58e7a43767f4f81000b4d22e
	false	undefined	0							undefined	0	58e7a5bc67f4f81000b4d4fd		false	388942	788	132	0	0	0	0	1	undefined	58e7a43767f4f81000b4d22e
	false	undefined	0							undefined	0	58e7a5bc67f4f81000b4d4fe		false	389408	789	127	0	0	0	0	1	undefined	58e7a43767f4f81000b4d22e
	false	undefined	0							undefined	0	58e7a5bd67f4f81000b4d4ff		true	389945	790	120	0	0	0	0	1	undefined	58e7a43767f4f81000b4d22e
	false	undefined	0							undefined	0	58e7a5be67f4f81000b4d500		true	390569	791	116	0	0	0	0	1	undefined	58e7a43767f4f81000b4d22e
	false	undefined	0							undefined	0	58e7a5be67f4f81000b4d501		true	391088	792	116	0	0	0	0	1	undefined	58e7a43767f4f81000b4d22e
	false	undefined	0							undefined	0	58e7a5bf67f4f81000b4d502		true	391556	793	116	0	0	0	0	1	undefined	58e7a43767f4f81000b4d22e
	false	undefined	0							undefined	0	58e7a5bf67f4f81000b4d503		true	392079	794	112	0	0	0	0	1	undefined	58e7a43767f4f81000b4d22e
	false	undefined	0							undefined	0	58e7a5c067f4f81000b4d504		true	392693	795	111	0	0	0	0	1	undefined	58e7a43767f4f81000b4d22e
	false	undefined	0							undefined	0	58e7a5c067f4f81000b4d505		false	393231	796	117	0	0	0	0	1	undefined	58e7a43767f4f81000b4d22e
	false	undefined	0							undefined	0	58e7a5c167f4f81000b4d506		false	393752	797	123	0	0	0	0	1	undefined	58e7a43767f4f81000b4d22e
	false	undefined	0							undefined	0	58e7a5c167f4f81000b4d507		false	394293	798	123	0	0	0	0	1	undefined	58e7a43767f4f81000b4d22e
	false	undefined	0							undefined	0	58e7a5c367f4f81000b4d508		false	394827	799	122	0	0	0	0	1	undefined	58e7a43767f4f81000b4d22e
	false	undefined	0							undefined	0	58e7a5c367f4f81000b4d509		false	396078	800	120	0	0	0	0	1	undefined	58e7a43767f4f81000b4d22e
	false	undefined	0							undefined	0	58e7a5c767f4f81000b4d50a		false	396880	802	115	0	0	0	0	1	undefined	58e7a43767f4f81000b4d22e
	false	undefined	0							undefined	0	58e7a5c867f4f81000b4d50b		false	400360	804	111	0	0	0	0	1	undefined	58e7a43767f4f81000b4d22e
	false	undefined	0							undefined	0	58e7a5c967f4f81000b4d50c		false	401503	810	119	0	0	0	0	1	undefined	58e7a43767f4f81000b4d22e
	false	undefined	0							undefined	0	58e7a5c967f4f81000b4d50d		false	402055	812	123	0	0	0	0	1	undefined	58e7a43767f4f81000b4d22e
	false	undefined	0							undefined	0	58e7a5c967f4f81000b4d50e		false	402426	813	121	0	0	0	0	1	undefined	58e7a43767f4f81000b4d22e
	false	undefined	0							undefined	0	58e7a5ca67f4f81000b4d50f		true	402837	814	121	0	0	0	0	1	undefined	58e7a43767f4f81000b4d22e
	false	undefined	0							undefined	0	58e7a5ca67f4f81000b4d510		false	403362	815	123	0	0	0	0	1	undefined	58e7a43767f4f81000b4d22e
	false	undefined	0							undefined	0	58e7a5cb67f4f81000b4d511		false	403917	816	120	0	0	0	0	1	undefined	58e7a43767f4f81000b4d22e
	false	undefined	0							undefined	0	58e7a5cb67f4f81000b4d512		false	404451	817	118	0	0	0	0	1	undefined	58e7a43767f4f81000b4d22e
	false	undefined	0							undefined	0	58e7a5cc67f4f81000b4d513		true	404983	818	111	0	0	0	0	1	undefined	58e7a43767f4f81000b4d22e
	false	undefined	0							undefined	0	58e7a5cd67f4f81000b4d514		true	405578	819	107	0	0	0	0	1	undefined	58e7a43767f4f81000b4d22e
	false	undefined	0							undefined	0	58e7a5cd67f4f81000b4d515		false	406108	820	110	0	0	0	0	1	undefined	58e7a43767f4f81000b4d22e
	false	undefined	0							undefined	0	58e7a5ce67f4f81000b4d516		true	406578	821	113	0	0	0	0	1	undefined	58e7a43767f4f81000b4d22e
	false	undefined	0							undefined	0	58e7a5ce67f4f81000b4d517		true	407105	822	120	0	0	0	0	1	undefined	58e7a43767f4f81000b4d22e
	false	undefined	0							undefined	0	58e7a5cf67f4f81000b4d518		true	407632	823	120	0	0	0	0	1	undefined	58e7a43767f4f81000b4d22e
	false	undefined	0							undefined	0	58e7a5cf67f4f81000b4d519		true	408187	824	129	0	0	0	0	1	undefined	58e7a43767f4f81000b4d22e
	false	undefined	0							undefined	0	58e7a5d067f4f81000b4d51a		true	408655	825	130	0	0	0	0	1	undefined	58e7a43767f4f81000b4d22e
	false	undefined	0							undefined	0	58e7a5d067f4f81000b4d51b		true	409173	826	127	0	0	0	0	1	undefined	58e7a43767f4f81000b4d22e
	false	undefined	0							undefined	0	58e7a5d167f4f81000b4d51c		false	409712	827	125	0	0	0	0	1	undefined	58e7a43767f4f81000b4d22e
	false	undefined	0							undefined	0	58e7a5d167f4f81000b4d51d		false	410252	828	121	0	0	0	0	1	undefined	58e7a43767f4f81000b4d22e
	false	undefined	0							undefined	0	58e7a5d267f4f81000b4d51e		false	410870	829	120	0	0	0	0	1	undefined	58e7a43767f4f81000b4d22e
	false	undefined	0							undefined	0	58e7a5d267f4f81000b4d51f		false	411386	830	118	0	0	0	0	1	undefined	58e7a43767f4f81000b4d22e
	false	undefined	0							undefined	0	58e7a5d367f4f81000b4d520		false	411927	831	122	0	0	0	0	1	undefined	58e7a43767f4f81000b4d22e
	false	undefined	0							undefined	0	58e7a5d367f4f81000b4d521		false	412478	832	120	0	0	0	0	1	undefined	58e7a43767f4f81000b4d22e
	false	undefined	0							undefined	0	58e7a5d467f4f81000b4d522		false	412910	833	114	0	0	0	0	1	undefined	58e7a43767f4f81000b4d22e
	false	undefined	0							undefined	0	58e7a5d567f4f81000b4d523		false	413458	834	-1	0	0	0	0	1	undefined	58e7a43767f4f81000b4d22e
	false	undefined	0							undefined	0	58e7a5d567f4f81000b4d524		true	413981	835	-1	0	0	0	0	1	undefined	58e7a43767f4f81000b4d22e
	false	undefined	0							undefined	0	58e7a5d567f4f81000b4d525		false	414542	836	-1	0	0	0	0	1	undefined	58e7a43767f4f81000b4d22e
	false	undefined	0							undefined	0	58e7a5d667f4f81000b4d526		false	415074	840	-1	0	0	0	0	1	undefined	58e7a43767f4f81000b4d22e
	false	undefined	0							undefined	0	58e7a5d767f4f81000b4d527		false	415601	841	-1	0	0	0	0	1	undefined	58e7a43767f4f81000b4d22e
	false	undefined	0							undefined	0	58e7a5d767f4f81000b4d528		false	416125	842	-1	0	0	0	0	1	undefined	58e7a43767f4f81000b4d22e
	false	undefined	0							undefined	0	58e7a5d867f4f81000b4d529		false	416667	843	93	0	0	0	0	1	undefined	58e7a43767f4f81000b4d22e
	false	undefined	0							undefined	0	58e7a5da67f4f81000b4d52a		false	417196	844	127	0	0	0	0	1	undefined	58e7a43767f4f81000b4d22e
	false	undefined	0							undefined	0	58e7a5db67f4f81000b4d52b		false	419207	845	121	0	0	0	0	1	undefined	58e7a43767f4f81000b4d22e
	false	undefined	0							undefined	0	58e7a5db67f4f81000b4d52c		false	419948	852	105	0	0	0	0	1	undefined	58e7a43767f4f81000b4d22e
	false	undefined	0							undefined	0	58e7a5db67f4f81000b4d52d		false	420393	853	108	0	0	0	0	1	undefined	58e7a43767f4f81000b4d22e
	false	undefined	0							undefined	0	58e7a5dc67f4f81000b4d52e		true	420936	854	106	0	0	0	0	1	undefined	58e7a43767f4f81000b4d22e
	false	undefined	0							undefined	0	58e7a5dc67f4f81000b4d52f		true	421490	855	-1	0	0	0	0	1	undefined	58e7a43767f4f81000b4d22e
	false	undefined	0							undefined	0	58e7a5dd67f4f81000b4d530		false	422023	856	-1	0	0	0	0	1	undefined	58e7a43767f4f81000b4d22e
	false	undefined	0							undefined	0	58e7a5de67f4f81000b4d531		false	422553	857	-1	0	0	0	0	1	undefined	58e7a43767f4f81000b4d22e
	false	undefined	0							undefined	0	58e7a5de67f4f81000b4d532		false	423066	861	66	0	0	0	0	1	undefined	58e7a43767f4f81000b4d22e
	false	undefined	0							undefined	0	58e7a5df67f4f81000b4d533		true	423563	862	76	0	0	0	0	1	undefined	58e7a43767f4f81000b4d22e
	false	undefined	0							undefined	0	58e7a5df67f4f81000b4d534		true	424145	863	-1	0	0	0	0	1	undefined	58e7a43767f4f81000b4d22e
	false	undefined	0							undefined	0	58e7a5e067f4f81000b4d535		true	424693	864	-1	0	0	0	0	1	undefined	58e7a43767f4f81000b4d22e
	false	undefined	0							undefined	0	58e7a5e067f4f81000b4d536		true	425220	865	-1	0	0	0	0	1	undefined	58e7a43767f4f81000b4d22e
	false	undefined	0							undefined	0	58e7a5e167f4f81000b4d537		true	425756	866	-1	0	0	0	0	1	undefined	58e7a43767f4f81000b4d22e
	false	undefined	0							undefined	0	58e7a5e167f4f81000b4d538		true	426285	867	-1	0	0	0	0	1	undefined	58e7a43767f4f81000b4d22e
	false	undefined	0							undefined	0	58e7a5e267f4f81000b4d539		true	426818	868	-1	0	0	0	0	1	undefined	58e7a43767f4f81000b4d22e
	false	undefined	0							undefined	0	58e7a5e267f4f81000b4d53a		true	427366	869	-1	0	0	0	0	1	undefined	58e7a43767f4f81000b4d22e
	false	undefined	0							undefined	0	58e7a5e367f4f81000b4d53b		true	427888	870	-1	0	0	0	0	1	undefined	58e7a43767f4f81000b4d22e
	false	undefined	0							undefined	0	58e7a5e467f4f81000b4d53c		true	428428	871	-1	0	0	0	0	1	undefined	58e7a43767f4f81000b4d22e
	false	undefined	0							undefined	0	58e7a5e567f4f81000b4d53d		true	429675	872	-1	0	0	0	0	1	undefined	58e7a43767f4f81000b4d22e
	false	undefined	0							undefined	0	58e7a5e667f4f81000b4d53e		true	430577	874	-1	0	0	0	0	1	undefined	58e7a43767f4f81000b4d22e
	false	undefined	0							undefined	0	58e7a5e667f4f81000b4d53f		true	431030	876	-1	0	0	0	0	1	undefined	58e7a43767f4f81000b4d22e
	false	undefined	0							undefined	0	58e7a5e767f4f81000b4d540		true	431569	877	-1	0	0	0	0	1	undefined	58e7a43767f4f81000b4d22e
	false	undefined	0							undefined	0	58e7a5e767f4f81000b4d541		true	432105	878	-1	0	0	0	0	1	undefined	58e7a43767f4f81000b4d22e
	false	undefined	0							undefined	0	58e7a5e867f4f81000b4d542		true	432630	879	-1	0	0	0	0	1	undefined	58e7a43767f4f81000b4d22e
	false	undefined	0							undefined	0	58e7a5e867f4f81000b4d543		true	433098	880	-1	0	0	0	0	1	undefined	58e7a43767f4f81000b4d22e
	false	undefined	0							undefined	0	58e7a5e967f4f81000b4d544		false	433703	881	-1	0	0	0	0	1	undefined	58e7a43767f4f81000b4d22e
	false	undefined	0							undefined	0	58e7a5e967f4f81000b4d545		false	434243	882	-1	0	0	0	0	1	undefined	58e7a43767f4f81000b4d22e
	false	undefined	0							undefined	0	58e7a5ea67f4f81000b4d546		false	434848	883	-1	0	0	0	0	1	undefined	58e7a43767f4f81000b4d22e
	false	undefined	0							undefined	0	58e7a5eb67f4f81000b4d547		false	435441	884	-1	0	0	0	0	1	undefined	58e7a43767f4f81000b4d22e
	false	undefined	0							undefined	0	58e7a5eb67f4f81000b4d548		false	435962	885	-1	0	0	0	0	1	undefined	58e7a43767f4f81000b4d22e
	false	undefined	0							undefined	0	58e7a5eb67f4f81000b4d549		false	436441	886	-1	0	0	0	0	1	undefined	58e7a43767f4f81000b4d22e
	false	undefined	0							undefined	0	58e7a5ec67f4f81000b4d54a		false	436989	887	-1	0	0	0	0	1	undefined	58e7a43767f4f81000b4d22e
	false	undefined	0							undefined	0	58e7a5ec67f4f81000b4d54b		false	437437	888	-1	0	0	0	0	1	undefined	58e7a43767f4f81000b4d22e
	false	undefined	0							undefined	0	58e7a5ed67f4f81000b4d54c		false	437987	889	-1	0	0	0	0	1	undefined	58e7a43767f4f81000b4d22e
	false	undefined	0							undefined	0	58e7a5ee67f4f81000b4d54d		false	438509	890	-1	0	0	0	0	1	undefined	58e7a43767f4f81000b4d22e
	false	undefined	0							undefined	0	58e7a5ef67f4f81000b4d54e		true	439124	891	124	0	0	0	0	1	undefined	58e7a43767f4f81000b4d22e
	false	undefined	0							undefined	0	58e7a5ef67f4f81000b4d54f		true	439986	892	-1	0	0	0	0	1	undefined	58e7a43767f4f81000b4d22e
	false	undefined	0							undefined	0	58e7a5ef67f4f81000b4d550		true	440387	893	-1	0	0	0	0	1	undefined	58e7a43767f4f81000b4d22e
	false	undefined	0							undefined	0	58e7a5f067f4f81000b4d551		true	440968	897	125	0	0	0	0	1	undefined	58e7a43767f4f81000b4d22e
	false	undefined	0							undefined	0	58e7a5f067f4f81000b4d552		false	441434	898	121	0	0	0	0	1	undefined	58e7a43767f4f81000b4d22e
	false	undefined	0							undefined	0	58e7a5f167f4f81000b4d553		false	441991	899	119	0	0	0	0	1	undefined	58e7a43767f4f81000b4d22e
	false	undefined	0							undefined	0	58e7a5f267f4f81000b4d554		false	442525	900	119	0	0	0	0	1	undefined	58e7a43767f4f81000b4d22e
	false	undefined	0							undefined	0	58e7a5f267f4f81000b4d555		false	443036	901	117	0	0	0	0	1	undefined	58e7a43767f4f81000b4d22e
	false	undefined	0							undefined	0	58e7a5f367f4f81000b4d556		false	443571	902	116	0	0	0	0	1	undefined	58e7a43767f4f81000b4d22e
	false	undefined	0							undefined	0	58e7a5f367f4f81000b4d557		false	444126	903	123	0	0	0	0	1	undefined	58e7a43767f4f81000b4d22e
	false	undefined	0							undefined	0	58e7a5f467f4f81000b4d558		false	444656	904	130	0	0	0	0	1	undefined	58e7a43767f4f81000b4d22e
	false	undefined	0							undefined	0	58e7a5f467f4f81000b4d559		false	445117	905	124	0	0	0	0	1	undefined	58e7a43767f4f81000b4d22e
	false	undefined	0							undefined	0	58e7a5f567f4f81000b4d55a		false	445669	906	118	0	0	0	0	1	undefined	58e7a43767f4f81000b4d22e
	false	undefined	0							undefined	0	58e7a5f567f4f81000b4d55b		false	446197	907	116	0	0	0	0	1	undefined	58e7a43767f4f81000b4d22e
	false	undefined	0							undefined	0	58e7a5f667f4f81000b4d55c		false	446791	908	120	0	0	0	0	1	undefined	58e7a43767f4f81000b4d22e
	false	undefined	0							undefined	0	58e7a5f667f4f81000b4d55d		false	447331	909	121	0	0	0	0	1	undefined	58e7a43767f4f81000b4d22e
	false	undefined	0							undefined	0	58e7a5f767f4f81000b4d55e		false	447950	910	120	0	0	0	0	1	undefined	58e7a43767f4f81000b4d22e
	false	undefined	0							undefined	0	58e7a5f767f4f81000b4d55f		false	448467	911	121	0	0	0	0	1	undefined	58e7a43767f4f81000b4d22e
	false	undefined	0							undefined	0	58e7a5f867f4f81000b4d560		false	449062	912	120	0	0	0	0	1	undefined	58e7a43767f4f81000b4d22e
	false	undefined	0							undefined	0	58e7a5f967f4f81000b4d561		false	449605	913	119	0	0	0	0	1	undefined	58e7a43767f4f81000b4d22e
	false	undefined	0							undefined	0	58e7a5f967f4f81000b4d562		false	450142	914	117	0	0	0	0	1	undefined	58e7a43767f4f81000b4d22e
	false	undefined	0							undefined	0	58e7a5fa67f4f81000b4d563		false	450818	915	116	0	0	0	0	1	undefined	58e7a43767f4f81000b4d22e
	false	undefined	0							undefined	0	58e7a5fa67f4f81000b4d564		false	451356	916	117	0	0	0	0	1	undefined	58e7a43767f4f81000b4d22e
	false	undefined	0							undefined	0	58e7a5fb67f4f81000b4d565		false	452014	917	121	0	0	0	0	1	undefined	58e7a43767f4f81000b4d22e
	false	undefined	0							undefined	0	58e7a5fb67f4f81000b4d566		false	452547	918	122	0	0	0	0	1	undefined	58e7a43767f4f81000b4d22e
	false	undefined	0							undefined	0	58e7a5fc67f4f81000b4d567		false	453079	919	120	0	0	0	0	1	undefined	58e7a43767f4f81000b4d22e
	false	undefined	0							undefined	0	58e7a5fd67f4f81000b4d568		false	453676	920	120	0	0	0	0	1	undefined	58e7a43767f4f81000b4d22e
	false	undefined	0							undefined	0	58e7a5fd67f4f81000b4d569		false	454281	921	118	0	0	0	0	1	undefined	58e7a43767f4f81000b4d22e
	false	undefined	0							undefined	0	58e7a5fe67f4f81000b4d56a		false	454802	922	118	0	0	0	0	1	undefined	58e7a43767f4f81000b4d22e
	false	undefined	0							undefined	0	58e7a5fe67f4f81000b4d56b		false	455356	923	121	0	0	0	0	1	undefined	58e7a43767f4f81000b4d22e
	false	undefined	0							undefined	0	58e7a5ff67f4f81000b4d56c		false	455877	924	123	0	0	0	0	1	undefined	58e7a43767f4f81000b4d22e
	false	undefined	0							undefined	0	58e7a5ff67f4f81000b4d56d		false	456337	925	122	0	0	0	0	1	undefined	58e7a43767f4f81000b4d22e
	false	undefined	0							undefined	0	58e7a60067f4f81000b4d56e		false	456868	926	119	0	0	0	0	1	undefined	58e7a43767f4f81000b4d22e
	false	undefined	0							undefined	0	58e7a60067f4f81000b4d56f		false	457416	927	116	0	0	0	0	1	undefined	58e7a43767f4f81000b4d22e
	false	undefined	0							undefined	0	58e7a60167f4f81000b4d570		false	457949	928	115	0	0	0	0	1	undefined	58e7a43767f4f81000b4d22e
	false	undefined	0							undefined	0	58e7a60167f4f81000b4d571		false	458488	929	121	0	0	0	0	1	undefined	58e7a43767f4f81000b4d22e
	false	undefined	0							undefined	0	58e7a60267f4f81000b4d572		false	459021	930	126	0	0	0	0	1	undefined	58e7a43767f4f81000b4d22e
	false	undefined	0							undefined	0	58e7a60267f4f81000b4d573		false	459531	931	128	0	0	0	0	1	undefined	58e7a43767f4f81000b4d22e
	false	undefined	0							undefined	0	58e7a60367f4f81000b4d574		false	460026	932	122	0	0	0	0	1	undefined	58e7a43767f4f81000b4d22e
	false	undefined	0							undefined	0	58e7a60467f4f81000b4d575		false	460563	933	118	0	0	0	0	1	undefined	58e7a43767f4f81000b4d22e
	false	undefined	0							undefined	0	58e7a60467f4f81000b4d576		false	461026	934	116	0	0	0	0	1	undefined	58e7a43767f4f81000b4d22e
	false	undefined	0							undefined	0	58e7a60567f4f81000b4d577		false	461565	935	119	0	0	0	0	1	undefined	58e7a43767f4f81000b4d22e
	false	undefined	0							undefined	0	58e7a60567f4f81000b4d578		false	462145	936	123	0	0	0	0	1	undefined	58e7a43767f4f81000b4d22e
	false	undefined	0							undefined	0	58e7a60667f4f81000b4d579		false	462687	937	120	0	0	0	0	1	undefined	58e7a43767f4f81000b4d22e
	false	undefined	0							undefined	0	58e7a60667f4f81000b4d57a		false	463212	938	120	0	0	0	0	1	undefined	58e7a43767f4f81000b4d22e
	false	undefined	0							undefined	0	58e7a60767f4f81000b4d57b		false	463752	939	120	0	0	0	0	1	undefined	58e7a43767f4f81000b4d22e
	false	undefined	0							undefined	0	58e7a60767f4f81000b4d57c		false	464297	940	120	0	0	0	0	1	undefined	58e7a43767f4f81000b4d22e
	false	undefined	0							undefined	0	58e7a60867f4f81000b4d57d		false	464816	941	122	0	0	0	0	1	undefined	58e7a43767f4f81000b4d22e
	false	undefined	0							undefined	0	58e7a60867f4f81000b4d57e		false	465374	942	122	0	0	0	0	1	undefined	58e7a43767f4f81000b4d22e
	false	undefined	0							undefined	0	58e7a60967f4f81000b4d57f		true	465887	943	126	0	0	0	0	1	undefined	58e7a43767f4f81000b4d22e
	false	undefined	0							undefined	0	58e7a60967f4f81000b4d580		false	466448	944	127	0	0	0	0	1	undefined	58e7a43767f4f81000b4d22e
	false	undefined	0							undefined	0	58e7a60a67f4f81000b4d581		false	466973	945	126	0	0	0	0	1	undefined	58e7a43767f4f81000b4d22e
	false	undefined	0							undefined	0	58e7a60b67f4f81000b4d582		false	467507	946	126	0	0	0	0	1	undefined	58e7a43767f4f81000b4d22e
	false	undefined	0							undefined	0	58e7a60b67f4f81000b4d583		false	468054	947	119	0	0	0	0	1	undefined	58e7a43767f4f81000b4d22e
	false	undefined	0							undefined	0	58e7a60c67f4f81000b4d584		false	468572	948	112	0	0	0	0	1	undefined	58e7a43767f4f81000b4d22e
	false	undefined	0							undefined	0	58e7a60c67f4f81000b4d585		false	469248	949	109	0	0	0	0	1	undefined	58e7a43767f4f81000b4d22e
	false	undefined	0							undefined	0	58e7a60d67f4f81000b4d586		true	469624	950	111	0	0	0	0	1	undefined	58e7a43767f4f81000b4d22e
	false	undefined	0							undefined	0	58e7a60d67f4f81000b4d587		false	470123	951	123	0	0	0	0	1	undefined	58e7a43767f4f81000b4d22e
	false	undefined	0							undefined	0	58e7a60e67f4f81000b4d588		false	470644	952	123	0	0	0	0	1	undefined	58e7a43767f4f81000b4d22e
	false	undefined	0							undefined	0	58e7a60e67f4f81000b4d589		false	471184	953	123	0	0	0	0	1	undefined	58e7a43767f4f81000b4d22e
	false	undefined	0							undefined	0	58e7a60f67f4f81000b4d58a		false	471793	954	117	0	0	0	0	1	undefined	58e7a43767f4f81000b4d22e
	false	undefined	0							undefined	0	58e7a60f67f4f81000b4d58b		false	472393	955	113	0	0	0	0	1	undefined	58e7a43767f4f81000b4d22e
	false	undefined	0							undefined	0	58e7a61067f4f81000b4d58c		false	472908	956	116	0	0	0	0	1	undefined	58e7a43767f4f81000b4d22e
	false	undefined	0							undefined	0	58e7a61067f4f81000b4d58d		true	473444	957	126	0	0	0	0	1	undefined	58e7a43767f4f81000b4d22e
	false	undefined	0							undefined	0	58e7a61167f4f81000b4d58e		true	473991	958	138	0	0	0	0	1	undefined	58e7a43767f4f81000b4d22e
	false	undefined	0							undefined	0	58e7a61167f4f81000b4d58f		true	474519	959	132	0	0	0	0	1	undefined	58e7a43767f4f81000b4d22e
	false	undefined	0							undefined	0	58e7a61267f4f81000b4d590		true	475050	960	119	0	0	0	0	1	undefined	58e7a43767f4f81000b4d22e
	false	undefined	0							undefined	0	58e7a61367f4f81000b4d591		true	475592	961	118	0	0	0	0	1	undefined	58e7a43767f4f81000b4d22e
	false	undefined	0							undefined	0	58e7a61367f4f81000b4d592		true	476117	962	123	0	0	0	0	1	undefined	58e7a43767f4f81000b4d22e
	false	undefined	0							undefined	0	58e7a61467f4f81000b4d593		true	476656	963	115	0	0	0	0	1	undefined	58e7a43767f4f81000b4d22e
	false	undefined	0							undefined	0	58e7a61467f4f81000b4d594		true	477268	964	108	0	0	0	0	1	undefined	58e7a43767f4f81000b4d22e
	false	undefined	0							undefined	0	58e7a61567f4f81000b4d595		false	477870	965	114	0	0	0	0	1	undefined	58e7a43767f4f81000b4d22e
	false	undefined	0							undefined	0	58e7a61567f4f81000b4d596		false	478466	966	120	0	0	0	0	1	undefined	58e7a43767f4f81000b4d22e
	false	undefined	0							undefined	0	58e7a61667f4f81000b4d597		false	478997	967	125	0	0	0	0	1	undefined	58e7a43767f4f81000b4d22e
	false	undefined	0							undefined	0	58e7a61767f4f81000b4d598		false	479594	968	126	0	0	0	0	1	undefined	58e7a43767f4f81000b4d22e
	false	undefined	0							undefined	0	58e7a61767f4f81000b4d599		false	480127	969	127	0	0	0	0	1	undefined	58e7a43767f4f81000b4d22e
	false	undefined	0							undefined	0	58e7a61867f4f81000b4d59a		false	480642	970	123	0	0	0	0	1	undefined	58e7a43767f4f81000b4d22e
	false	undefined	0							undefined	0	58e7a61867f4f81000b4d59b		false	481211	971	126	0	0	0	0	1	undefined	58e7a43767f4f81000b4d22e
	false	undefined	0							undefined	0	58e7a61967f4f81000b4d59c		false	481724	972	124	0	0	0	0	1	undefined	58e7a43767f4f81000b4d22e
	false	undefined	0							undefined	0	58e7a61967f4f81000b4d59d		false	482255	973	127	0	0	0	0	1	undefined	58e7a43767f4f81000b4d22e
	false	undefined	0							undefined	0	58e7a61a67f4f81000b4d59e		false	482752	974	126	0	0	0	0	1	undefined	58e7a43767f4f81000b4d22e
	false	undefined	0							undefined	0	58e7a61a67f4f81000b4d59f		true	483336	975	123	0	0	0	0	1	undefined	58e7a43767f4f81000b4d22e
	false	undefined	0							undefined	0	58e7a61b67f4f81000b4d5a0		true	483868	976	123	0	0	0	0	1	undefined	58e7a43767f4f81000b4d22e
	false	undefined	0							undefined	0	58e7a61b67f4f81000b4d5a1		true	484417	977	123	0	0	0	0	1	undefined	58e7a43767f4f81000b4d22e
	false	undefined	0							undefined	0	58e7a61c67f4f81000b4d5a2		true	485078	978	124	0	0	0	0	1	undefined	58e7a43767f4f81000b4d22e
	false	undefined	0							undefined	0	58e7a61d67f4f81000b4d5a3		false	485546	979	122	0	0	0	0	1	undefined	58e7a43767f4f81000b4d22e
	false	undefined	0							undefined	0	58e7a61d67f4f81000b4d5a4		false	486077	980	121	0	0	0	0	1	undefined	58e7a43767f4f81000b4d22e
	false	undefined	0							undefined	0	58e7a61e67f4f81000b4d5a5		true	486592	981	123	0	0	0	0	1	undefined	58e7a43767f4f81000b4d22e
	false	undefined	0							undefined	0	58e7a61e67f4f81000b4d5a6		false	487140	982	123	0	0	0	0	1	undefined	58e7a43767f4f81000b4d22e
	false	undefined	0							undefined	0	58e7a61f67f4f81000b4d5a7		false	487669	983	129	0	0	0	0	1	undefined	58e7a43767f4f81000b4d22e
	false	undefined	0							undefined	0	58e7a61f67f4f81000b4d5a8		false	488208	984	127	0	0	0	0	1	undefined	58e7a43767f4f81000b4d22e
	false	undefined	0							undefined	0	58e7a62067f4f81000b4d5a9		true	488751	985	126	0	0	0	0	1	undefined	58e7a43767f4f81000b4d22e
	false	undefined	0							undefined	0	58e7a62067f4f81000b4d5aa		false	489279	986	123	0	0	0	0	1	undefined	58e7a43767f4f81000b4d22e
	false	undefined	0							undefined	0	58e7a62167f4f81000b4d5ab		false	489809	987	123	0	0	0	0	1	undefined	58e7a43767f4f81000b4d22e
	false	undefined	0							undefined	0	58e7a62167f4f81000b4d5ac		false	490342	988	122	0	0	0	0	1	undefined	58e7a43767f4f81000b4d22e
	false	undefined	0							undefined	0	58e7a62267f4f81000b4d5ad		false	490891	989	118	0	0	0	0	1	undefined	58e7a43767f4f81000b4d22e
	false	undefined	0							undefined	0	58e7a62267f4f81000b4d5ae		false	491416	990	119	0	0	0	0	1	undefined	58e7a43767f4f81000b4d22e
	false	undefined	0							undefined	0	58e7a62367f4f81000b4d5af		false	491938	991	122	0	0	0	0	1	undefined	58e7a43767f4f81000b4d22e
	false	undefined	0							undefined	0	58e7a62367f4f81000b4d5b0		false	492494	992	123	0	0	0	0	1	undefined	58e7a43767f4f81000b4d22e
	false	undefined	0							undefined	0	58e7a62467f4f81000b4d5b1		false	493032	993	122	0	0	0	0	1	undefined	58e7a43767f4f81000b4d22e
	false	undefined	0							undefined	0	58e7a62567f4f81000b4d5b2		true	493630	994	126	0	0	0	0	1	undefined	58e7a43767f4f81000b4d22e
	false	undefined	0							undefined	0	58e7a62567f4f81000b4d5b3		true	494158	995	126	0	0	0	0	1	undefined	58e7a43767f4f81000b4d22e
	false	undefined	0							undefined	0	58e7a62667f4f81000b4d5b4		true	494623	996	116	0	0	0	0	1	undefined	58e7a43767f4f81000b4d22e
	false	undefined	0							undefined	0	58e7a62667f4f81000b4d5b5		true	495148	997	112	0	0	0	0	1	undefined	58e7a43767f4f81000b4d22e
	false	undefined	0							undefined	0	58e7a62767f4f81000b4d5b6		false	495692	998	116	0	0	0	0	1	undefined	58e7a43767f4f81000b4d22e
	false	undefined	0							undefined	0	58e7a62867f4f81000b4d5b7		true	496206	999	121	0	0	0	0	1	undefined	58e7a43767f4f81000b4d22e
	false	undefined	0							undefined	0	58e7a62867f4f81000b4d5b8		false	497043	1000	122	0	0	0	0	1	undefined	58e7a43767f4f81000b4d22e
	false	undefined	0							undefined	0	58e7a62867f4f81000b4d5b9		false	497365	1001	126	0	0	0	0	1	undefined	58e7a43767f4f81000b4d22e
	false	undefined	0							undefined	0	58e7a62967f4f81000b4d5ba		false	497836	1002	122	0	0	0	0	1	undefined	58e7a43767f4f81000b4d22e
	false	undefined	0							undefined	0	58e7a62967f4f81000b4d5bb		false	498365	1003	121	0	0	0	0	1	undefined	58e7a43767f4f81000b4d22e
	false	undefined	0							undefined	0	58e7a62a67f4f81000b4d5bc		false	498902	1004	123	0	0	0	0	1	undefined	58e7a43767f4f81000b4d22e
	false	undefined	0							undefined	0	58e7a62a67f4f81000b4d5bd		false	499506	1005	125	0	0	0	0	1	undefined	58e7a43767f4f81000b4d22e
	false	undefined	0							undefined	0	58e7a62b67f4f81000b4d5be		false	500042	1006	121	0	0	0	0	1	undefined	58e7a43767f4f81000b4d22e
	false	undefined	0							undefined	0	58e7a62c67f4f81000b4d5bf		false	500696	1007	119	0	0	0	0	1	undefined	58e7a43767f4f81000b4d22e
	false	undefined	0							undefined	0	58e7a62c67f4f81000b4d5c0		false	501307	1008	122	0	0	0	0	1	undefined	58e7a43767f4f81000b4d22e
	false	undefined	0							undefined	0	58e7a62d67f4f81000b4d5c1		false	501840	1009	122	0	0	0	0	1	undefined	58e7a43767f4f81000b4d22e
	false	undefined	0							undefined	0	58e7a62d67f4f81000b4d5c2		false	502358	1010	121	0	0	0	0	1	undefined	58e7a43767f4f81000b4d22e
	false	undefined	0							undefined	0	58e7a62e67f4f81000b4d5c3		false	502905	1011	121	0	0	0	0	1	undefined	58e7a43767f4f81000b4d22e
	false	undefined	0							undefined	0	58e7a62e67f4f81000b4d5c4		false	503428	1012	126	0	0	0	0	1	undefined	58e7a43767f4f81000b4d22e
	false	undefined	0							undefined	0	58e7a62f67f4f81000b4d5c5		false	503970	1013	126	0	0	0	0	1	undefined	58e7a43767f4f81000b4d22e
	false	undefined	0							undefined	0	58e7a62f67f4f81000b4d5c6		false	504517	1014	123	0	0	0	0	1	undefined	58e7a43767f4f81000b4d22e
	false	undefined	0							undefined	0	58e7a63067f4f81000b4d5c7		false	505118	1015	119	0	0	0	0	1	undefined	58e7a43767f4f81000b4d22e
	false	undefined	0							undefined	0	58e7a63167f4f81000b4d5c8		true	505647	1016	118	0	0	0	0	1	undefined	58e7a43767f4f81000b4d22e
	false	undefined	0							undefined	0	58e7a63167f4f81000b4d5c9		true	506178	1017	118	0	0	0	0	1	undefined	58e7a43767f4f81000b4d22e
	false	undefined	0							undefined	0	58e7a63267f4f81000b4d5ca		true	506734	1018	131	0	0	0	0	1	undefined	58e7a43767f4f81000b4d22e
	false	undefined	0							undefined	0	58e7a63267f4f81000b4d5cb		true	507339	1019	132	0	0	0	0	1	undefined	58e7a43767f4f81000b4d22e
	false	undefined	0							undefined	0	58e7a63367f4f81000b4d5cc		false	507763	1020	131	0	0	0	0	1	undefined	58e7a43767f4f81000b4d22e
	false	undefined	0							undefined	0	58e7a63367f4f81000b4d5cd		false	508326	1021	128	0	0	0	0	1	undefined	58e7a43767f4f81000b4d22e
	false	undefined	0							undefined	0	58e7a63467f4f81000b4d5ce		false	508857	1022	130	0	0	0	0	1	undefined	58e7a43767f4f81000b4d22e
	false	undefined	0							undefined	0	58e7a63467f4f81000b4d5cf		true	509389	1023	130	0	0	0	0	1	undefined	58e7a43767f4f81000b4d22e
	false	undefined	0							undefined	0	58e7a63567f4f81000b4d5d0		true	509930	1024	129	0	0	0	0	1	undefined	58e7a43767f4f81000b4d22e
	false	undefined	0							undefined	0	58e7a63567f4f81000b4d5d1		true	510460	1025	126	0	0	0	0	1	undefined	58e7a43767f4f81000b4d22e
	false	undefined	0							undefined	0	58e7a63667f4f81000b4d5d2		false	510994	1026	125	0	0	0	0	1	undefined	58e7a43767f4f81000b4d22e
	false	undefined	0							undefined	0	58e7a63767f4f81000b4d5d3		false	511536	1027	128	0	0	0	0	1	undefined	58e7a43767f4f81000b4d22e
	false	undefined	0							undefined	0	58e7a63767f4f81000b4d5d4		false	512069	1028	126	0	0	0	0	1	undefined	58e7a43767f4f81000b4d22e
	false	undefined	0							undefined	0	58e7a63867f4f81000b4d5d5		false	512596	1029	120	0	0	0	0	1	undefined	58e7a43767f4f81000b4d22e
	false	undefined	0							undefined	0	58e7a63867f4f81000b4d5d6		false	513197	1030	119	0	0	0	0	1	undefined	58e7a43767f4f81000b4d22e
	false	undefined	0							undefined	0	58e7a63967f4f81000b4d5d7		false	513811	1031	119	0	0	0	0	1	undefined	58e7a43767f4f81000b4d22e
	false	undefined	0							undefined	0	58e7a63967f4f81000b4d5d8		false	514324	1032	120	0	0	0	0	1	undefined	58e7a43767f4f81000b4d22e
	false	undefined	0							undefined	0	58e7a63a67f4f81000b4d5d9		false	514853	1033	120	0	0	0	0	1	undefined	58e7a43767f4f81000b4d22e
	false	undefined	0							undefined	0	58e7a63a67f4f81000b4d5da		false	515406	1034	119	0	0	0	0	1	undefined	58e7a43767f4f81000b4d22e
	false	undefined	0							undefined	0	58e7a63b67f4f81000b4d5db		false	515936	1035	118	0	0	0	0	1	undefined	58e7a43767f4f81000b4d22e
	false	undefined	0							undefined	0	58e7a63b67f4f81000b4d5dc		false	516458	1036	117	0	0	0	0	1	undefined	58e7a43767f4f81000b4d22e
	false	undefined	0							undefined	0	58e7a63c67f4f81000b4d5dd		true	517006	1037	64	0	0	0	0	1	undefined	58e7a43767f4f81000b4d22e
	false	undefined	0							undefined	0	58e7a63c67f4f81000b4d5de		true	517538	1038	73	0	0	0	0	1	undefined	58e7a43767f4f81000b4d22e
	false	undefined	0							undefined	0	58e7a63d67f4f81000b4d5df		true	518090	1039	71	0	0	0	0	1	undefined	58e7a43767f4f81000b4d22e
	false	undefined	0							undefined	0	58e7a63e67f4f81000b4d5e0		true	518614	1043	63	0	0	0	0	1	undefined	58e7a43767f4f81000b4d22e
	false	undefined	0							undefined	0	58e7a63e67f4f81000b4d5e1		true	519140	1044	125	0	0	0	0	1	undefined	58e7a43767f4f81000b4d22e
	false	undefined	0							undefined	0	58e7a63f67f4f81000b4d5e2		false	519824	1045	125	0	0	0	0	1	undefined	58e7a43767f4f81000b4d22e
	false	undefined	0							undefined	0	58e7a63f67f4f81000b4d5e3		true	520332	1046	123	0	0	0	0	1	undefined	58e7a43767f4f81000b4d22e
	false	undefined	0							undefined	0	58e7a64067f4f81000b4d5e4		true	520745	1047	120	0	0	0	0	1	undefined	58e7a43767f4f81000b4d22e
	false	undefined	0							undefined	0	58e7a64067f4f81000b4d5e5		false	521238	1048	123	0	0	0	0	1	undefined	58e7a43767f4f81000b4d22e
	false	undefined	0							undefined	0	58e7a64167f4f81000b4d5e6		false	521808	1049	124	0	0	0	0	1	undefined	58e7a43767f4f81000b4d22e
	false	undefined	0							undefined	0	58e7a64167f4f81000b4d5e7		false	522279	1050	123	0	0	0	0	1	undefined	58e7a43767f4f81000b4d22e
	false	undefined	0							undefined	0	58e7a64267f4f81000b4d5e8		false	522801	1051	124	0	0	0	0	1	undefined	58e7a43767f4f81000b4d22e
	false	undefined	0							undefined	0	58e7a64267f4f81000b4d5e9		false	523265	1052	121	0	0	0	0	1	undefined	58e7a43767f4f81000b4d22e
	false	undefined	0							undefined	0	58e7a64367f4f81000b4d5ea		true	523893	1053	122	0	0	0	0	1	undefined	58e7a43767f4f81000b4d22e
	false	undefined	0							undefined	0	58e7a64367f4f81000b4d5eb		false	524489	1054	121	0	0	0	0	1	undefined	58e7a43767f4f81000b4d22e
	false	undefined	0							undefined	0	58e7a64467f4f81000b4d5ec		true	524956	1055	116	0	0	0	0	1	undefined	58e7a43767f4f81000b4d22e
	false	undefined	0							undefined	0	58e7a64467f4f81000b4d5ed		false	525486	1056	121	0	0	0	0	1	undefined	58e7a43767f4f81000b4d22e
	false	undefined	0							undefined	0	58e7a64567f4f81000b4d5ee		false	526024	1057	128	0	0	0	0	1	undefined	58e7a43767f4f81000b4d22e
	false	undefined	0							undefined	0	58e7a64667f4f81000b4d5ef		false	526554	1058	133	0	0	0	0	1	undefined	58e7a43767f4f81000b4d22e
	false	undefined	0							undefined	0	58e7a64667f4f81000b4d5f0		false	527104	1059	132	0	0	0	0	1	undefined	58e7a43767f4f81000b4d22e
	false	undefined	0							undefined	0	58e7a64767f4f81000b4d5f1		false	527688	1060	127	0	0	0	0	1	undefined	58e7a43767f4f81000b4d22e
	false	undefined	0							undefined	0	58e7a64767f4f81000b4d5f2		false	528227	1061	126	0	0	0	0	1	undefined	58e7a43767f4f81000b4d22e
	false	undefined	0							undefined	0	58e7a64867f4f81000b4d5f3		false	528765	1062	130	0	0	0	0	1	undefined	58e7a43767f4f81000b4d22e
	false	undefined	0							undefined	0	58e7a64867f4f81000b4d5f4		false	529299	1063	131	0	0	0	0	1	undefined	58e7a43767f4f81000b4d22e
	false	undefined	0							undefined	0	58e7a64967f4f81000b4d5f5		true	529826	1064	127	0	0	0	0	1	undefined	58e7a43767f4f81000b4d22e
	false	undefined	0							undefined	0	58e7a64967f4f81000b4d5f6		true	530366	1065	122	0	0	0	0	1	undefined	58e7a43767f4f81000b4d22e
	false	undefined	0							undefined	0	58e7a64a67f4f81000b4d5f7		false	530907	1066	112	0	0	0	0	1	undefined	58e7a43767f4f81000b4d22e
	false	undefined	0							undefined	0	58e7a64a67f4f81000b4d5f8		true	531442	1067	107	0	0	0	0	1	undefined	58e7a43767f4f81000b4d22e
	false	undefined	0							undefined	0	58e7a64b67f4f81000b4d5f9		true	531966	1068	97	0	0	0	0	1	undefined	58e7a43767f4f81000b4d22e
	false	undefined	0							undefined	0	58e7a64b67f4f81000b4d5fa		true	532493	1069	121	0	0	0	0	1	undefined	58e7a43767f4f81000b4d22e
	false	undefined	0							undefined	0	58e7a64c67f4f81000b4d5fb		true	533035	1070	-1	0	0	0	0	1	undefined	58e7a43767f4f81000b4d22e
	false	undefined	0							undefined	0	58e7a64d67f4f81000b4d5fc		true	533570	1071	-1	0	0	0	0	1	undefined	58e7a43767f4f81000b4d22e
	false	undefined	0							undefined	0	58e7a64d67f4f81000b4d5fd		false	534027	1075	119	0	0	0	0	1	undefined	58e7a43767f4f81000b4d22e
	false	undefined	0							undefined	0	58e7a64e67f4f81000b4d5fe		false	534583	1076	120	0	0	0	0	1	undefined	58e7a43767f4f81000b4d22e
	false	undefined	0							undefined	0	58e7a64e67f4f81000b4d5ff		false	535104	1077	124	0	0	0	0	1	undefined	58e7a43767f4f81000b4d22e
	false	undefined	0							undefined	0	58e7a64f67f4f81000b4d600		false	535645	1078	126	0	0	0	0	1	undefined	58e7a43767f4f81000b4d22e
	false	undefined	0							undefined	0	58e7a64f67f4f81000b4d601		false	536180	1079	127	0	0	0	0	1	undefined	58e7a43767f4f81000b4d22e
	false	undefined	0							undefined	0	58e7a65067f4f81000b4d602		false	536654	1080	126	0	0	0	0	1	undefined	58e7a43767f4f81000b4d22e
	false	undefined	0							undefined	0	58e7a65067f4f81000b4d603		false	537177	1081	124	0	0	0	0	1	undefined	58e7a43767f4f81000b4d22e
	false	undefined	0							undefined	0	58e7a65167f4f81000b4d604		false	537793	1082	123	0	0	0	0	1	undefined	58e7a43767f4f81000b4d22e
	false	undefined	0							undefined	0	58e7a65167f4f81000b4d605		false	538381	1083	124	0	0	0	0	1	undefined	58e7a43767f4f81000b4d22e
	false	undefined	0							undefined	0	58e7a65267f4f81000b4d606		false	538915	1084	121	0	0	0	0	1	undefined	58e7a43767f4f81000b4d22e
	false	undefined	0							undefined	0	58e7a65267f4f81000b4d607		false	539431	1085	122	0	0	0	0	1	undefined	58e7a43767f4f81000b4d22e
	false	undefined	0							undefined	0	58e7a65367f4f81000b4d608		true	539988	1086	118	0	0	0	0	1	undefined	58e7a43767f4f81000b4d22e
	false	undefined	0							undefined	0	58e7a65467f4f81000b4d609		true	540616	1087	118	0	0	0	0	1	undefined	58e7a43767f4f81000b4d22e
	false	undefined	0							undefined	0	58e7a65467f4f81000b4d60a		true	541252	1088	118	0	0	0	0	1	undefined	58e7a43767f4f81000b4d22e
	false	undefined	0							undefined	0	58e7a65567f4f81000b4d60b		true	541601	1089	130	0	0	0	0	1	undefined	58e7a43767f4f81000b4d22e
	false	undefined	0							undefined	0	58e7a65567f4f81000b4d60c		false	542187	1090	130	0	0	0	0	1	undefined	58e7a43767f4f81000b4d22e
	false	undefined	0							undefined	0	58e7a65667f4f81000b4d60d		true	542720	1091	128	0	0	0	0	1	undefined	58e7a43767f4f81000b4d22e
	false	undefined	0							undefined	0	58e7a65667f4f81000b4d60e		true	543241	1092	128	0	0	0	0	1	undefined	58e7a43767f4f81000b4d22e
	false	undefined	0							undefined	0	58e7a65767f4f81000b4d60f		true	543718	1093	129	0	0	0	0	1	undefined	58e7a43767f4f81000b4d22e
	false	undefined	0							undefined	0	58e7a65767f4f81000b4d610		true	544335	1094	133	0	0	0	0	1	undefined	58e7a43767f4f81000b4d22e
	false	undefined	0							undefined	0	58e7a65867f4f81000b4d611		false	544867	1095	131	0	0	0	0	1	undefined	58e7a43767f4f81000b4d22e
	false	undefined	0							undefined	0	58e7a65867f4f81000b4d612		true	545397	1096	125	0	0	0	0	1	undefined	58e7a43767f4f81000b4d22e
	false	undefined	0							undefined	0	58e7a65967f4f81000b4d613		true	545932	1097	117	0	0	0	0	1	undefined	58e7a43767f4f81000b4d22e
	false	undefined	0							undefined	0	58e7a65967f4f81000b4d614		false	546391	1098	114	0	0	0	0	1	undefined	58e7a43767f4f81000b4d22e
	false	undefined	0							undefined	0	58e7a65b67f4f81000b4d615		true	546994	1099	113	0	0	0	0	1	undefined	58e7a43767f4f81000b4d22e
	false	undefined	0							undefined	0	58e7a65c67f4f81000b4d616		true	548148	1100	113	0	0	0	0	1	undefined	58e7a43767f4f81000b4d22e
	false	undefined	0							undefined	0	58e7a65c67f4f81000b4d617		true	549074	1102	113	0	0	0	0	1	undefined	58e7a43767f4f81000b4d22e
	false	undefined	0							undefined	0	58e7a65d67f4f81000b4d618		true	549669	1107	89	0	0	0	0	1	undefined	58e7a43767f4f81000b4d22e
	false	undefined	0							undefined	0	58e7a65d67f4f81000b4d619		true	550187	1108	104	0	0	0	0	1	undefined	58e7a43767f4f81000b4d22e
	false	undefined	0							undefined	0	58e7a65e67f4f81000b4d61a		true	550737	1109	103	0	0	0	0	1	undefined	58e7a43767f4f81000b4d22e
	false	undefined	0							undefined	0	58e7a65e67f4f81000b4d61b		true	551267	1110	-1	0	0	0	0	1	undefined	58e7a43767f4f81000b4d22e
	false	undefined	0							undefined	0	58e7a65f67f4f81000b4d61c		false	551815	1111	-1	0	0	0	0	1	undefined	58e7a43767f4f81000b4d22e
	false	undefined	0							undefined	0	58e7a66067f4f81000b4d61d		true	552619	1112	-1	0	0	0	0	1	undefined	58e7a43767f4f81000b4d22e
	false	undefined	0							undefined	0	58e7a66067f4f81000b4d61e		true	552957	1116	-1	0	0	0	0	1	undefined	58e7a43767f4f81000b4d22e
	false	undefined	0							undefined	0	58e7a66067f4f81000b4d61f		true	553426	1117	-1	0	0	0	0	1	undefined	58e7a43767f4f81000b4d22e
	false	undefined	0							undefined	0	58e7a66167f4f81000b4d620		true	553945	1118	93	0	0	0	0	1	undefined	58e7a43767f4f81000b4d22e
	false	undefined	0							undefined	0	58e7a66167f4f81000b4d621		true	554476	1119	-1	0	0	0	0	1	undefined	58e7a43767f4f81000b4d22e
	false	undefined	0							undefined	0	58e7a66267f4f81000b4d622		true	555014	1120	-1	0	0	0	0	1	undefined	58e7a43767f4f81000b4d22e
	false	undefined	0							undefined	0	58e7a66367f4f81000b4d623		true	555608	1121	-1	0	0	0	0	1	undefined	58e7a43767f4f81000b4d22e
	false	undefined	0							undefined	0	58e7a66367f4f81000b4d624		true	556157	1122	-1	0	0	0	0	1	undefined	58e7a43767f4f81000b4d22e
	false	undefined	0							undefined	0	58e7a66467f4f81000b4d625		true	556693	1123	-1	0	0	0	0	1	undefined	58e7a43767f4f81000b4d22e
	false	undefined	0							undefined	0	58e7a66467f4f81000b4d626		true	557148	1124	-1	0	0	0	0	1	undefined	58e7a43767f4f81000b4d22e
	false	undefined	0							undefined	0	58e7a66567f4f81000b4d627		false	557690	1125	-1	0	0	0	0	1	undefined	58e7a43767f4f81000b4d22e
	false	undefined	0							undefined	0	58e7a66567f4f81000b4d628		false	558217	1126	-1	0	0	0	0	1	undefined	58e7a43767f4f81000b4d22e
	false	undefined	0							undefined	0	58e7a66667f4f81000b4d629		false	558758	1127	-1	0	0	0	0	1	undefined	58e7a43767f4f81000b4d22e
	false	undefined	0							undefined	0	58e7a66667f4f81000b4d62a		false	559287	1128	-1	0	0	0	0	1	undefined	58e7a43767f4f81000b4d22e
	false	undefined	0							undefined	0	58e7a66767f4f81000b4d62b		true	559815	1129	-1	0	0	0	0	1	undefined	58e7a43767f4f81000b4d22e
	false	undefined	0							undefined	0	58e7a66767f4f81000b4d62c		false	560236	1130	55	0	0	0	0	1	undefined	58e7a43767f4f81000b4d22e
	false	undefined	0							undefined	0	58e7a66867f4f81000b4d62d		false	560826	1131	52	0	0	0	0	1	undefined	58e7a43767f4f81000b4d22e
	false	undefined	0							undefined	0	58e7a66867f4f81000b4d62e		false	561358	1132	42	0	0	0	0	1	undefined	58e7a43767f4f81000b4d22e
	false	undefined	0							undefined	0	58e7a66967f4f81000b4d62f		false	561963	1133	42	0	0	0	0	1	undefined	58e7a43767f4f81000b4d22e
	false	undefined	0							undefined	0	58e7a66967f4f81000b4d630		false	562493	1134	40	0	0	0	0	1	undefined	58e7a43767f4f81000b4d22e
	false	undefined	0							undefined	0	58e7a66a67f4f81000b4d631		false	563103	1135	40	0	0	0	0	1	undefined	58e7a43767f4f81000b4d22e
	false	undefined	0							undefined	0	58e7a66b67f4f81000b4d632		false	563636	1136	41	0	0	0	0	1	undefined	58e7a43767f4f81000b4d22e
	false	undefined	0							undefined	0	58e7a66b67f4f81000b4d633		false	564172	1137	41	0	0	0	0	1	undefined	58e7a43767f4f81000b4d22e
	false	undefined	0							undefined	0	58e7a66c67f4f81000b4d634		false	564700	1138	43	0	0	0	0	1	undefined	58e7a43767f4f81000b4d22e
	false	undefined	0							undefined	0	58e7a66c67f4f81000b4d635		false	565231	1148	53	0	0	0	0	1	undefined	58e7a43767f4f81000b4d22e
	false	undefined	0							undefined	0	58e7a66d67f4f81000b4d636		false	565767	1149	39	0	0	0	0	1	undefined	58e7a43767f4f81000b4d22e
	false	undefined	0							undefined	0	58e7a66d67f4f81000b4d637		false	566302	1150	-1	0	0	0	0	1	undefined	58e7a43767f4f81000b4d22e
	false	undefined	0							undefined	0	58e7a66e67f4f81000b4d638		false	566828	1151	-1	0	0	0	0	1	undefined	58e7a43767f4f81000b4d22e
	false	undefined	0							undefined	0	58e7a66e67f4f81000b4d639		false	567364	1152	-1	0	0	0	0	1	undefined	58e7a43767f4f81000b4d22e
	false	undefined	0							undefined	0	58e7a66f67f4f81000b4d63a		false	567789	1153	-1	0	0	0	0	1	undefined	58e7a43767f4f81000b4d22e
	false	undefined	0							undefined	0	58e7a66f67f4f81000b4d63b		false	568375	1154	-1	0	0	0	0	1	undefined	58e7a43767f4f81000b4d22e
	false	undefined	0							undefined	0	58e7a67067f4f81000b4d63c		false	568906	1155	-1	0	0	0	0	1	undefined	58e7a43767f4f81000b4d22e
	false	undefined	0							undefined	0	58e7a67067f4f81000b4d63d		false	569442	1156	-1	0	0	0	0	1	undefined	58e7a43767f4f81000b4d22e
	false	undefined	0							undefined	0	58e7a67167f4f81000b4d63e		false	569975	1157	-1	0	0	0	0	1	undefined	58e7a43767f4f81000b4d22e
	false	undefined	0							undefined	0	58e7a67167f4f81000b4d63f		false	570509	1158	-1	0	0	0	0	1	undefined	58e7a43767f4f81000b4d22e
	false	undefined	0							undefined	0	58e7a67267f4f81000b4d640		false	571121	1159	-1	0	0	0	0	1	undefined	58e7a43767f4f81000b4d22e
	false	undefined	0							undefined	0	58e7a67367f4f81000b4d641		false	571701	1160	-1	0	0	0	0	1	undefined	58e7a43767f4f81000b4d22e
	false	undefined	0							undefined	0	58e7a67367f4f81000b4d642		false	572123	1161	-1	0	0	0	0	1	undefined	58e7a43767f4f81000b4d22e
	false	undefined	0							undefined	0	58e7a67467f4f81000b4d643		false	572738	1162	-1	0	0	0	0	1	undefined	58e7a43767f4f81000b4d22e
	false	undefined	0							undefined	0	58e7a67467f4f81000b4d644		false	573319	1163	-1	0	0	0	0	1	undefined	58e7a43767f4f81000b4d22e
	false	undefined	0							undefined	0	58e7a67567f4f81000b4d645		false	573845	1164	-1	0	0	0	0	1	undefined	58e7a43767f4f81000b4d22e
[truncated: 34 more columns]
